# Supplementary material for: Multifunctional P-ligand-controlled “silicon-centered” selectivity in Rh/Cu-catalyzed Si–C bond cleavage of silacyclobutanes
Source: Royal Society of Chemistry journal article supplement (doi:10.1039/d1qo01386f), 2021-01-01
Supplement: d1qo01386f1.pdf [file d1qo01386f1.pdf]

## Supporting Information

### **Multifunctional P-ligand -Controlled “Silicon-Centered” Selectivity in Rh/Cu -Catalyzed Si-C bond Cleavage of Silacyclobutanes**

*Xu Wang, Shuai-Shuai Huang, Feng-Jiao Zhang, Jia-Le Xie, Zhao Li, Zheng Xu, Fei Ye, Li-Wen Xu\**

## Content

|                                                                                                                                               |    |
|-----------------------------------------------------------------------------------------------------------------------------------------------|----|
| <b>1. General Information</b> .....                                                                                                           | 1  |
| <b>2. Experimental Procedures and Spectral Data of Reactants</b> .....                                                                        | 1  |
| <b>3. Experimental Procedures and Spectral Data of Products</b> .....                                                                         | 5  |
| <b>3.1. General procedure for the Rh/Cu-cocatalyzed (3+2) annulation of silacycles with internal alkynes</b> .....                            | 6  |
| <b>Table S1. The effect of Rhodium metal salts</b> .....                                                                                      | 33 |
| <b>Table S2. The effect of P-ligands</b> .....                                                                                                | 34 |
| <b>Table S3. The effect of Additive and Temperature</b> .....                                                                                 | 36 |
| <b>Table S4. The effect of the amount</b> .....                                                                                               | 37 |
| <b>Table S5. The effect of solvent</b> .....                                                                                                  | 38 |
| <b>Table S6. Control Experiments</b> .....                                                                                                    | 39 |
| <b>3.2. General procedure for the synthesis of Ar-BINMOL-Phos</b> .....                                                                       | 40 |
| <b>3.3. General procedure for the asymmetric version for the Rh/Cu-cocatalyzed (3+2) annulation of silacycles with internal alkynes</b> ..... | 46 |
| <b>Table S7. The effect of chiral phosphoramidite ligands</b> .....                                                                           | 56 |
| <b>Table S8. The effect of temperature</b> .....                                                                                              | 58 |
| <b>Table S9. Comparative Experiment</b> .....                                                                                                 | 58 |
| <b>3.4. General procedure for the synthesis of 4a</b> .....                                                                                   | 59 |
| <b>4. Downstream transformation of product 3g</b> .....                                                                                       | 60 |
| <b>5. Supplementary Figures</b> .....                                                                                                         | 61 |
| <b>Figure S1. NOESY spectrum of 3g. The determination of the structure of product 3g</b> .....                                                | 61 |
| <b>Figure S2. NOESY spectrum of <i>anti</i>-4a. The determination of the structure of product <i>anti</i>-4a</b> .....                        | 62 |
| <b>6. Determination of Absolute Configuration by ECD Experiments</b> .....                                                                    | 63 |
| <b>Figure S3. DFT calculation for the ECD spectrum of chiral product 3p</b> .....                                                             | 64 |
| <b>Figure S4. Experimentally tested ECD spectrum of chiral product 3p</b> .....                                                               | 66 |
| <b>Figure S5. DFT calculation for the ECD spectrum of chiral product 3g</b> .....                                                             | 67 |

|                                                                                      |     |
|--------------------------------------------------------------------------------------|-----|
| <b>Figure S6. Experimentally tested ECD spectrum of chiral product 3g</b> .....      | 67  |
| <b>7. References</b> .....                                                           | 68  |
| <b>8. <sup>1</sup>H NMR, <sup>13</sup>C NMR and <sup>31</sup>P NMR Spectra</b> ..... | 69  |
| <b>9. HPLC Spectra</b> .....                                                         | 138 |

## 1. General Information

Unless specifically stated, all reagents were commercially obtained and where appropriate, purified prior to use. For example, all the aldehydes recrystallized or distilled prior to use. Dichloromethane, toluene, were freshly distilled from  $\text{CaH}_2$ , tetrahydrofuran (THF) and 1,4-dioxane were dried and distilled from metal sodium and benzophenone.  $\text{Et}_3\text{N}$  solvents were dried. Other commercially available reagents and solvents were used directly without purification. Reactions were monitored by thin layer chromatography (TLC) using silica gel plates. Flash column chromatography was performed over silica (300-400 mesh).  $^1\text{H}$  NMR,  $^{13}\text{C}$  NMR spectra were recorded on a Bruker 400 MHz or 500 MHz spectrometer in  $\text{CDCl}_3$ . Multiplicities were given as: s (singlet); d (doublet); dd (doublets of doublet); t (triplet); q (quartet); or m (multiplets). High resolution mass spectra (HRMS) of the products were obtained on a Bruker Daltonics micro TOF spectrometer. HPLC was carried out with a Agilent 1260 infinity, Waters AcQuity HPLC or Waters AcQuity UPLC using a chiralcel AD-H column, a chiralcel OJ-H column, a chiralcel IA column, a chiralcel OD-H column, a chiralcel IC column, or a chiralcel OX-H column, a chiralcel OP column, a chiralcel Phenomenex column.

## 2. Experimental Procedures and Spectral Data of Reactants

### 2.1. General procedure for the synthesis of Silacyclobutanes (S3).<sup>1</sup>

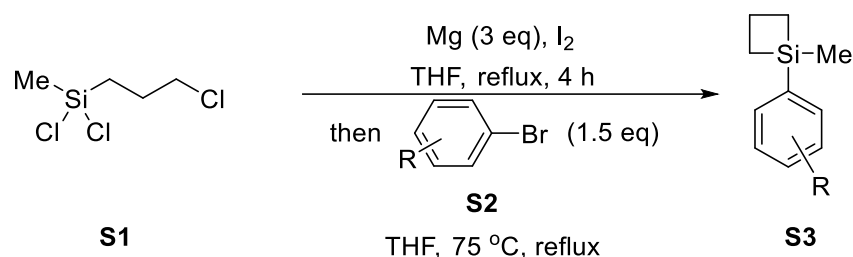

Magnesium (60 mmol), 5 mL solution of the **S1** in THF (3.12 mL of the **S1** was dissolved in 20 mL THF) and a grain of  $\text{I}_2$  in dry THF was heated to reflux. The rest of the **S1** solution was added dropwise over a period of 1 h and the resulting solution was refluxed for additional 4 h. **S2** (30 mmol) dissolved in 30 mL THF was added dropwise



over a period of 3 h and the resulting solution was refluxed overnight. The reaction was allowed to cool to room temperature before quenching with 15 mL aq.  $\text{NH}_4\text{Cl}$ . The mixture was extracted with EtOAc ( $3 \times 15$  mL). The combined organic layers were then dried over  $\text{Na}_2\text{SO}_4$  and concentrated under reduced vacuum. The residue was purified by silica gel flash column chromatography (eluent: petroleum ether) to afford **S3** as colorless oil.

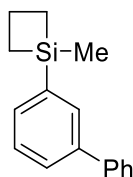

### 1-([1,1'-biphenyl]-3-yl)-1-methylsiletane (**1x**):

Colorless oil,  $^1\text{H}$  NMR (400 MHz, Chloroform-*d*)  $\delta$  8.16 (s, 1H), 7.93-7.85 (m, 4H), 7.77-7.67 (m, 3H), 7.61 (t,  $J = 6.8$  Hz, 1H), 2.60-2.45 (m, 2H), 1.74-1.60 (m, 2H), 1.58-1.43 (m, 2H), 0.89 (d,  $J = 1.1$  Hz, 3H).  $^{13}\text{C}$  NMR (100 MHz, Chloroform-*d*)  $\delta$  142.6, 141.9, 140.3, 133.5, 133.4, 129.9, 129.5, 129.4, 128.4, 128.3, 15.6, -0.5. GC MS (EI)  $m/z$ : 238.1, 210.1, 195.1, 181.0, 165.1, 152.1.

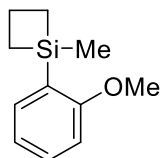

### 1-(2-methoxyphenyl)-1-methylsiletane (**1aq**):

Colorless oil,  $^1\text{H}$  NMR (400 MHz, Chloroform-*d*)  $\delta$  7.55 (dd,  $J = 7.1, 1.8$  Hz, 1H), 7.50-7.40 (m, 1H), 7.06 (t,  $J = 7.2$  Hz, 1H), 6.92 (d,  $J = 8.1$  Hz, 1H), 3.87 (s, 3H), 2.28-2.13 (m, 2H), 1.45-1.32 (m, 2H), 1.29-1.15 (m, 2H), 0.58 (s, 3H).  $^{13}\text{C}$  NMR (100 MHz, Chloroform-*d*)  $\delta$  164.2, 135.1, 131.4, 126.8, 120.7, 109.7, 55.3, 18.4, 14.5, -0.6. GC MS (EI)  $m/z$ : 192.1, 164.1, 149.0, 134.1, 121.1, 105.0, 59.0.

## 2.2. General procedure for the synthesis of propyl 3-(*m*-tolyl)propiolate (**S6**).<sup>2</sup>

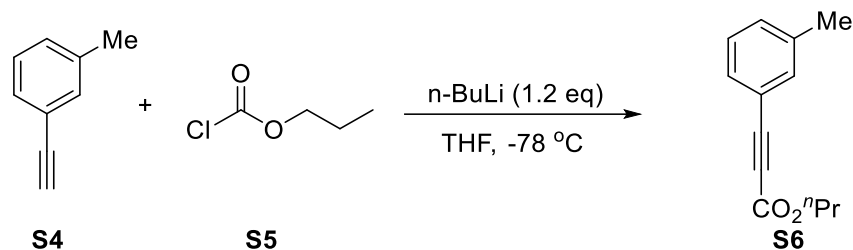

Dry THF (20 mL) was added to the **S4** (1 equiv, 10.0 mmol) in a round-bottom flask equipped with a stir bar. The solution was cooled to  $-78\text{ }^\circ\text{C}$ , and n-BuLi (2.5 M in hexanes, 12.0 mmol) was added dropwise, and the resulting solution was stirred. After 1 hours, **S5** (1.2 equiv, 12.0 mmol) was added dropwise to the mixture at  $-78\text{ }^\circ\text{C}$  and the resulting mixture was stirred for 8 h. The reaction was then diluted with ethyl acetate, and water was added. The organic layer was washed with brine and dried over anhydrous sodium sulfate. Concentration in vacuo yielded a yellow oil which, upon purification by column chromatography, yielded the corresponding ester **S6**.

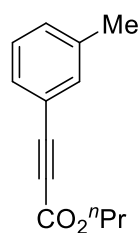

#### Propyl 3-(m-tolyl)propiolate (**2d**):

Yellow oil,  $^1\text{H}$  NMR (400 MHz, Chloroform-d)  $\delta$  7.31-7.26 (m, 2H), 7.18-7.11 (m, 2H), 4.09 (t,  $J = 6.7$  Hz, 2H), 2.23 (s, 3H), 1.73-1.51 (m, 2H), 0.89 (t,  $J = 7.4$  Hz, 3H).  $^{13}\text{C}$  NMR (100 MHz, Chloroform-d)  $\delta$  154.2, 138.4, 133.4, 131.5, 130.1, 128.5, 119.4, 86.3, 80.4, 67.5, 21.9, 21.1, 10.3. HRMS (ESI-TOF)  $m/z$ :  $[\text{M} + \text{Na}]^+$  calculated for  $\text{C}_{13}\text{H}_{14}\text{NaO}_2$ : 225.0886, found: 225.0873.

#### 2.3. General procedure for the synthesis of tert-butyl 3-phenylpropiolate (**S9**).<sup>3</sup>

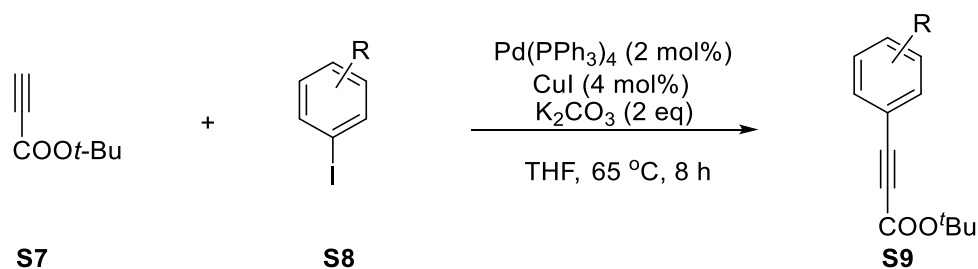

The reaction of **S8** (1.2 eq, 36 mmol) with **S7** (30 mmol) in THF at 65 °C in the presence of Pd(PPh<sub>3</sub>)<sub>4</sub> (2 mol%), copper(I) iodide (4 mol %) and K<sub>2</sub>CO<sub>3</sub> (2 eq) afforded the ester **S9** after 6 h. The mixture was extracted with EtOAc (3 × 15 mL). The combined organic layers were then dried over Na<sub>2</sub>SO<sub>4</sub> and concentrated under reduced vacuum. The residue was purified by silica gel flash column chromatography (eluent: EA/PE = 50/1) to afford **S9**.

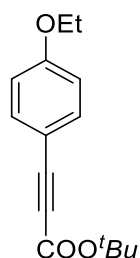

**Tert-butyl 3-(4-ethoxyphenyl)propiolate (2l):**

White solid, mp 48 - 51 °C <sup>1</sup>H NMR (400 MHz, Chloroform-*d*) δ 7.43 (d, *J* = 8.8 Hz, 2H), 6.77 (d, *J* = 8.8 Hz, 2H), 3.96 (q, *J* = 7.0 Hz, 2H), 1.46 (s, 6H), 1.34 (t, *J* = 7.0 Hz, 2H). <sup>13</sup>C NMR (100 MHz, Chloroform-*d*) δ 159.8, 152.5, 133.9, 113.7, 110.6, 83.8, 82.3, 80.5, 62.7, 27.2, 13.8. HRMS (ESI-TOF) *m/z*: [M+ Na]<sup>+</sup> calculated for C<sub>15</sub>H<sub>18</sub>NaO<sub>3</sub>: 269.1148, found: 269.1154.

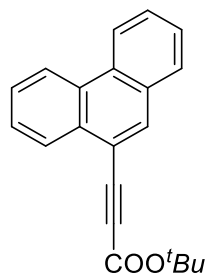

**Tert-butyl 3-(phenanthren-9-yl)propiolate (2ad):**

White solid, mp 73 - 76 °C; <sup>1</sup>H NMR (400 MHz, Chloroform-*d*) δ 8.58-8.46 (m, 2H), 8.35-8.26 (m, 1H), 8.04 (s, 1H), 7.76-7.70 (m, 1H), 7.61-7.54 (m, 3H), 7.53-7.44 (m, 1H), 1.51 (s, 9H). <sup>13</sup>C NMR (100 MHz, Chloroform-*d*) δ 153.4, 135.2, 131.1, 130.8, 130.7, 130.0, 129.1, 128.6, 127.6, 127.5, 127.2, 126.8, 122.9, 122.8, 116.5, 86.3, 83.7, 82.4, 28.2. HRMS (ESI-TOF) *m/z*: [M+ Na]<sup>+</sup> calculated for C<sub>21</sub>H<sub>18</sub>NaO<sub>2</sub>: 325.1199, found: 325.1194.

## 2.4. General procedure for the synthesis of triisopropylsilyl 3-(*m*-tolyl)propiolate (**S13**).<sup>4</sup>

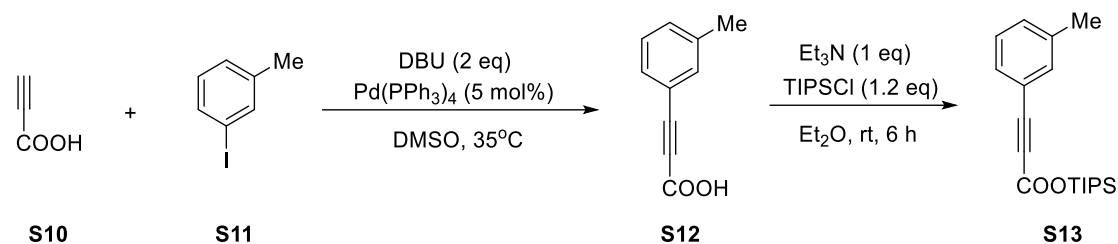

a) An oven dried 25 mL round-bottomed glass flask equipped with a magnetic stirring bar was charged with the **S11** (20 mmol), Pd(PPh<sub>3</sub>)<sub>4</sub> (1 mmol), and DBU (40 mmol) in dimethyl sulfoxide (40 mL), to which was added **S10** (22 mmol). The reaction mixture was stirred at 35 °C for 12 h. The corresponding **S12** was isolated after addition of 30 mL of saturated Na<sub>2</sub>CO<sub>3</sub> solution and extraction with ethyl acetate. The crude product was recrystallized or purified by column chromatography.

b) To a solution of **S12** (10 mmol) and triethylamine (10 mmol) in Et<sub>2</sub>O (20 mL) was slowly added TIPSCl (12 mmol) at room temperature. Volatiles were removed under reduced pressure. And then, hexane (20 mL) was added to the crude product and the residue was purified by silica gel flash column chromatography (eluent: EA/PE = 50/1) to afford **S13**.

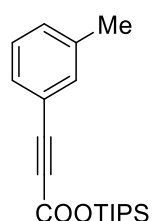

### Triisopropylsilyl 3-(*m*-tolyl)propiolate (**2ae**):

Yellow oil, <sup>1</sup>H NMR (400 MHz, Chloroform-*d*) δ 7.35-7.27 (m, 2H), 7.19-7.13 (m, 2H), 2.25 (s, 3H), 1.34-1.21 (m, 3H), 1.04 (d, *J* = 7.5 Hz, 18H). <sup>13</sup>C NMR (100 MHz, Chloroform-*d*) δ 153.3, 138.4, 133.6, 131.4, 130.2, 128.5, 119.9, 85.5, 82.0, 21.2, 17.8, 12.1. HRMS (ESI-TOF) *m/z*: [M+ Na]<sup>+</sup> calculated for C<sub>19</sub>H<sub>28</sub>NaO<sub>2</sub>Si:339.1751, found:339.1760.

## 3. Experimental Procedures and Spectral Data of Products

### 3.1. General procedure for the Rh/Cu-cocatalyzed (3+2) annulation of silacycles with internal alkynes

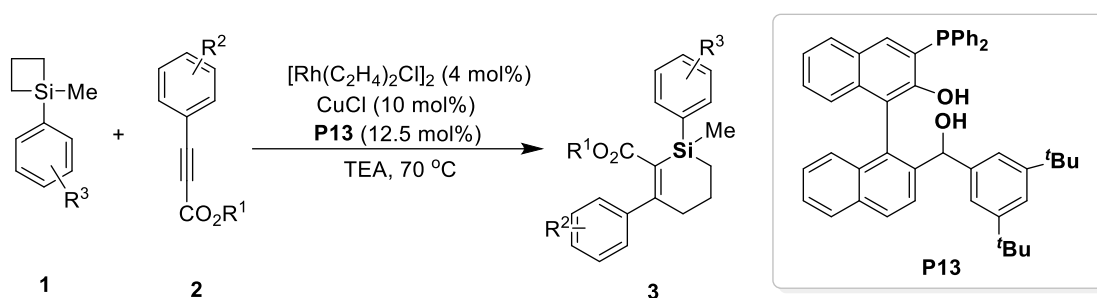

Silacyclobutane **1** (0.2 mmol),  $[\text{Rh}(\text{C}_2\text{H}_4)_2\text{Cl}]_2$  (3.2 mg, 0.008 mmol), CuCl (2.0 mg, 0.02 mmol) and **P13** (16.8 mg, 0.025 mmol) in TEA (2 mL) was stirred at room temperature for 30 min. Then the substrate **2** (2.5 eq, 0.5 mmol) was added to the reaction mixture, and the reaction was stirred at 70 °C for 14 h. Upon reaction completion, the mixture was concentrated under reduced vacuum. The residue was purified by silica gel flash column chromatography (eluent: PE and EtOAc) to afford **3**.

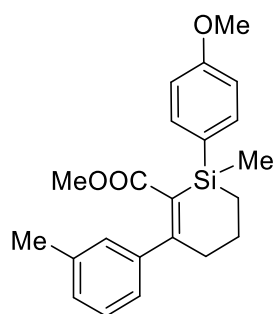

#### Methyl 1-(4-methoxyphenyl)-1-methyl-3-(m-tolyl)-1,4,5,6-tetrahydro-1H-silole-2-carboxylate (**3a**):

Yellow oil (52 mg, 71% yield).  $^1\text{H}$  NMR (400 MHz, Chloroform-*d*)  $\delta$  7.45 (d,  $J = 8.4$  Hz, 2H), 7.08 (t,  $J = 7.6$  Hz, 1H), 6.99-6.88 (m, 3H), 6.82 (d,  $J = 8.5$  Hz, 2H), 3.68 (s, 3H), 3.21 (s, 3H), 2.59-2.40 (m, 2H), 2.23 (s, 3H), 1.91-1.83 (m, 2H), 1.01-0.91 (m, 1H), 0.84-0.74 (m, 1H), 0.44 (s, 3H);  $^{13}\text{C}$  NMR (100 MHz, Chloroform-*d*)  $\delta$  171.8, 163.3, 160.7, 144.6, 137.7, 135.8, 129.6, 128.4, 128.1, 127.7, 127.1, 123.7, 113.7, 55.1, 51.1, 37.0, 21.5, 21.3, 11.3, -3.2; IR (KBr,  $\text{cm}^{-1}$ ): 2917.8, 1700.0, 1591.9, 1502.9, 1277.9, 1245.8, 1181.8, 1110.9, 1028.8, 800.4, 703.9; HRMS (ESI-TOF)  $m/z$ :  $[\text{M} + \text{Na}]^+$  calculated for  $\text{C}_{22}\text{H}_{26}\text{NaO}_3\text{Si}$ : 389.1543, found: 389.1529.

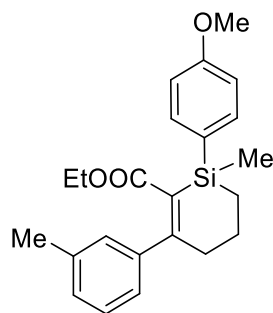

**Ethyl 1-(4-methoxyphenyl)-1-methyl-3-(m-tolyl)-1,4,5,6-tetrahydrosilane-2-carboxylate (3b):**

Colorless oil (50 mg, 65% yield).  $^1\text{H}$  NMR (400 MHz, Chloroform-*d*)  $\delta$  7.48 (d,  $J = 8.6$  Hz, 2H), 7.10 (t,  $J = 7.5$  Hz, 1H), 7.02-6.90 (m, 3H), 6.83 (d,  $J = 8.5$  Hz, 2H), 3.75-3.67 (m, 5H), 2.61-2.50 (m, 1H), 2.51-2.39 (m, 1H), 2.24 (s, 3H), 1.94-1.85 (m, 2H), 1.04-0.92 (m, 1H), 0.87-0.76 (m, 1H), 0.72 (t,  $J = 7.1$  Hz, 3H), 0.46 (s, 3H);  $^{13}\text{C}$  NMR (100 MHz, Chloroform-*d*)  $\delta$  171.3, 163.2, 160.7, 144.7, 137.6, 135.8, 129.8, 128.3, 128.0, 127.8, 127.25, 123.8, 113.6, 59.8, 55.1, 37.1, 21.5, 21.3, 13.8, 11.3, -3.1; IR (KBr,  $\text{cm}^{-1}$ ): 2920.9, 1695.5, 1592.3, 1502.9, 1278.2, 1181.2, 1111.1, 805.6, 703.8; HRMS (ESI-TOF)  $m/z$ :  $[\text{M} + \text{Na}]^+$  calculated for  $\text{C}_{23}\text{H}_{28}\text{NaO}_3\text{Si}$ : 403.1700, found: 403.1717.

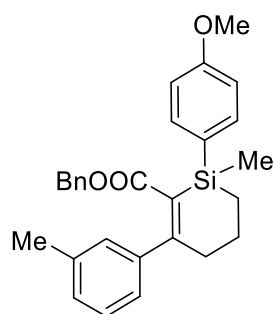

**Benzyl 1-(4-methoxyphenyl)-1-methyl-3-(m-tolyl)-1,4,5,6-tetrahydrosilane-2-carboxylate (3c):**

Colorless oil (71.6 mg, 81% yield).  $^1\text{H}$  NMR (400 MHz, Chloroform-*d*)  $\delta$  7.43 (d,  $J = 8.5$  Hz, 2H), 7.12-7.04 (m, 4H), 7.00-6.90 (m, 3H), 6.80 (d,  $J = 8.5$  Hz, 2H), 6.72-6.67 (m, 2H), 4.64 (dd, 2H), 3.71 (s, 3H), 2.59-2.41 (m, 2H), 2.20 (s, 3H), 1.94-1.84 (m, 2H), 0.99-0.92 (m, 1H), 0.86-0.75 (m, 1H), 0.43 (s, 3H);  $^{13}\text{C}$  NMR (100 MHz, Chloroform-*d*)  $\delta$  171.2, 163.4, 160.7, 144.7, 137.8, 135.9, 135.9, 129.5, 128.4, 128.2, 128.2, 127.7, 127.6, 127.2, 123.8, 113.7, 65.9, 55.1, 37.1, 21.5, 21.2, 11.4, -3.3; IR (KBr,  $\text{cm}^{-1}$ ):

2918.8, 1696.2, 1592.2, 1502.5, 1278.3, 1180.5, 1111.3, 806.8, 696.9; HRMS (ESI-TOF)  $m/z$ :  $[M+Na]^+$  calculated for  $C_{28}H_{30}NaO_3Si$ : 465.1856, found: 465.1870.

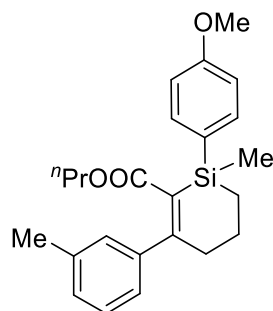

**Propyl 1-(4-methoxyphenyl)-1-methyl-3-(m-tolyl)-1,4,5,6-tetrahydrosilole-2-carboxylate (3d):**

Colorless oil (53 mg, 67% yield).  $^1H$  NMR (400 MHz, Chloroform-*d*)  $\delta$  7.48 (d,  $J = 8.5$  Hz, 2H), 7.10 (t,  $J = 7.5$  Hz, 1H), 7.01-6.90 (m, 3H), 6.83 (d,  $J = 8.5$  Hz, 2H), 3.72 (s, 3H), 3.64-3.57 (m, 1H), 2.60-2.51 (m, 1H), 2.50-2.39 (m, 1H), 2.24 (s, 3H), 1.97-1.79 (m, 2H), 1.22-1.09 (m, 2H), 1.00-0.91 (m, 1H), 0.85-0.75 (m, 1H), 0.50 (t,  $J = 7.4$  Hz, 3H), 0.46 (s, 3H);  $^{13}C$  NMR (100 MHz, Chloroform-*d*)  $\delta$  171.5, 162.9, 160.7, 144.7, 137.7, 135.8, 129.8, 128.3, 128.1, 127.9, 127.3, 123.7, 113.6, 65.7, 55.1, 37.1, 21.7, 21.5, 21.3, 11.4, 10.3, -3.2; IR (KBr,  $cm^{-1}$ ): 2920.6, 1694.3, 1592.4, 1502.9, 1278.2, 1181.1, 1111.2, 802.0; HRMS (ESI-TOF)  $m/z$ :  $[M+Na]^+$  calculated for  $C_{24}H_{30}NaO_3Si$ : 417.1856, found: 417.1881.

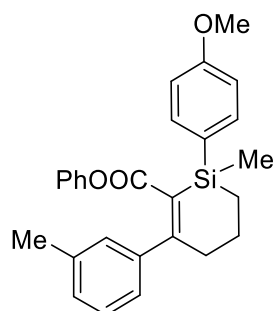

**Phenyl 1-(4-methoxyphenyl)-1-methyl-3-(m-tolyl)-1,4,5,6-tetrahydrosilole-2-carboxylate (3e):**

Colorless oil (66 mg, 77% yield).  $^1H$  NMR (400 MHz, Chloroform-*d*)  $\delta$  7.54 (d,  $J = 8.4$  Hz, 2H), 7.15 (t,  $J = 7.4$  Hz, 1H), 7.10-7.02 (m, 5H), 6.96 (t,  $J = 7.4$  Hz, 1H), 6.85 (d,  $J = 8.4$  Hz, 2H), 6.32 (d,  $J = 7.8$  Hz, 2H), 3.71 (s, 3H), 2.73-2.58 (m, 1H), 2.58-2.47 (m, 1H), 2.26 (s, 3H), 2.09-1.82 (m, 2H), 1.10-1.01 (m, 1H), 0.93-0.81 (m, 1H), 0.55

(s, 3H);  $^{13}\text{C}$  NMR (100 MHz, Chloroform-*d*)  $\delta$  169.9, 163.7, 160.9, 150.7, 144.5, 137.9, 136.0, 129.4, 129.1, 128.7, 128.3, 127.4, 127.2, 125.4, 124.0, 121.6, 113.8, 55.1, 36.9, 21.5, 21.3, 11.2, -3.3; IR (KBr,  $\text{cm}^{-1}$ ): 2912.1, 1717.1, 1591.4, 1278.2, 1248.1, 1159.0, 1110.7, 971.3, 802.2; HRMS (ESI-TOF)  $m/z$ :  $[\text{M} + \text{Na}]^+$  calculated for  $\text{C}_{27}\text{H}_{28}\text{NaO}_3\text{Si}$ : 451.1700, found: 451.1716.

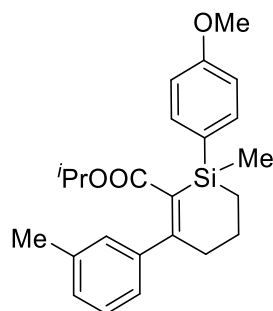

**Isopropyl 1-(4-methoxyphenyl)-1-methyl-3-(m-tolyl)-1,4,5,6-tetrahydrosilole-2-carboxylate (3f):**

Colorless oil (59 mg, 75% yield).  $^1\text{H}$  NMR (400 MHz, Chloroform-*d*)  $\delta$  7.48 (d,  $J = 8.4$  Hz, 2H), 7.09 (t,  $J = 7.4$  Hz, 1H), 7.00-6.93 (m, 3H), 6.82 (d,  $J = 8.5$  Hz, 2H), 4.66-4.56 (m, 1H), 3.71 (s, 3H), 2.60-2.50 (m, 1H), 2.48-2.38 (m, 1H), 2.23 (s, 3H), 1.94-1.84 (m, 2H), 1.01-0.92 (m, 1H), 0.85-0.78 (m, 1H), 0.75 (d,  $J = 6.3$  Hz, 3H), 0.68 (d,  $J = 6.3$  Hz, 3H), 0.47 (s, 3H);  $^{13}\text{C}$  NMR (100 MHz, Chloroform-*d*)  $\delta$  170.8, 162.2, 160.7, 144.6, 137.5, 135.9, 130.2, 128.2, 128.0, 127.8, 127.4, 123.8, 113.6, 67.0, 55.1, 36.9, 21.5, 21.5, 21.3, 21.3, 11.3, -3.2; IR (KBr,  $\text{cm}^{-1}$ ): 2919.5, 1692.9, 1592.7, 1503.3, 1278.8, 1245.2, 1181.7, 1109.9, 803.1; HRMS (ESI-TOF)  $m/z$ :  $[\text{M} + \text{Na}]^+$  calculated for  $\text{C}_{24}\text{H}_{30}\text{NaO}_3\text{Si}$ : 417.1856, found: 417.1841.

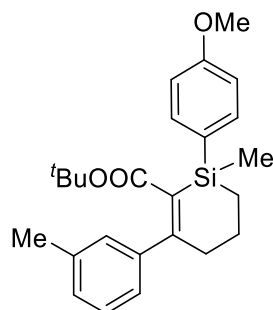

**Tert-butyl 1-(4-methoxyphenyl)-1-methyl-3-(m-tolyl)-1,4,5,6-tetrahydrosilole-2-carboxylate (3g):**



Yellow oil (63.4 mg, 78% yield).  $^1\text{H}$  NMR (400 MHz, Chloroform-*d*)  $\delta$  7.49 (d,  $J = 8.5$  Hz, 2H), 7.11 (t,  $J = 7.6$  Hz, 1H), 7.02-6.91 (m, 3H), 6.83 (d,  $J = 8.6$  Hz, 2H), 3.72 (s, 3H), 2.57-2.38 (m, 2H), 2.24 (s, 3H), 1.93-1.84 (m, 2H), 0.97 (s, 10H), 0.83-0.74 (m, 1H), 0.46 (s, 3H);  $^{13}\text{C}$  NMR (100 MHz, Chloroform-*d*)  $\delta$  170.6, 161.6, 160.7, 144.8, 137.4, 136.0, 131.3, 128.1 (d,  $J = 2.8$  Hz), 128.0, 127.6, 123.9, 113.5, 79.8, 55.1, 36.8, 27.7, 21.5, 21.3, 11.5, -3.2; IR (KBr,  $\text{cm}^{-1}$ ): 2912.9, 1691.3, 1592.9, 1503.2, 1278.5, 1246.2, 1156.6, 1111.3, 806.8, 696.9; HRMS (ESI-TOF)  $m/z$ :  $[\text{M} + \text{Na}]^+$  calculated for  $\text{C}_{25}\text{H}_{32}\text{NaO}_3\text{Si}$ : 431.2013, found: 431.2026.

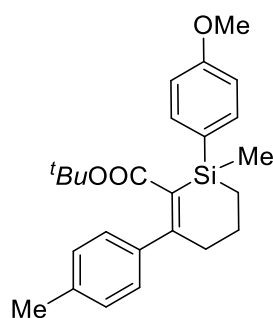

**Tert-butyl 1-(4-methoxyphenyl)-1-methyl-3-(p-tolyl)-1,4,5,6-tetrahydrosilole-2-carboxylate (3h):**

Yellow oil (69.4 mg, 85% yield).  $^1\text{H}$  NMR (400 MHz, Chloroform-*d*)  $\delta$  7.48 (d,  $J = 8.5$  Hz, 2H), 7.07-6.99 (m, 4H), 6.82 (d,  $J = 8.5$  Hz, 2H), 3.71 (s, 3H), 2.57-2.39 (m, 2H), 2.25 (s, 3H), 1.94-1.82 (m, 2H), 0.98 (s, 9H), 0.95-0.89 (m, 1H), 0.83-0.75 (m, 1H), 0.45 (s, 3H);  $^{13}\text{C}$  NMR (100 MHz, Chloroform-*d*)  $\delta$  170.5, 161.8, 160.7, 142.0, 137.0, 135.9, 131.1, 128.7, 128.2, 126.8, 113.5, 79.8, 55.1, 37.0, 27.8, 21.4, 21.3, 11.6, -3.2; IR (KBr,  $\text{cm}^{-1}$ ): 2920.9, 1689.9, 1592.7, 1503.1, 1365.4, 1278.4, 1245.9, 1156.1, 1111.1, 803.5; HRMS (ESI-TOF)  $m/z$ :  $[\text{M} + \text{Na}]^+$  calculated for  $\text{C}_{25}\text{H}_{32}\text{NaO}_3\text{Si}$ : 431.2013, found: 431.2001.

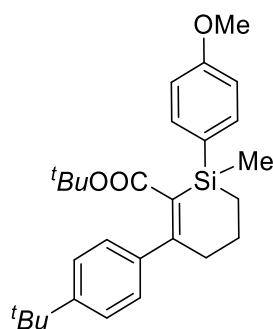

**Tert-butyl 3-(4-(tert-butyl)phenyl)-1-(4-methoxyphenyl)-1-methyl-1,4,5,6-**

**tetrahydrosilane-2-carboxylate (3i):**

Yellow oil (83.7 mg, 93% yield).  $^1\text{H}$  NMR (400 MHz, Chloroform-*d*)  $\delta$  7.49 (d,  $J = 8.5$  Hz, 2H), 7.23 (d,  $J = 8.3$  Hz, 2H), 7.08 (d,  $J = 8.3$  Hz, 2H), 6.83 (d,  $J = 8.5$  Hz, 2H), 3.72 (s, 3H), 2.59-2.39 (m, 2H), 1.91-1.85 (m, 2H), 1.23 (s, 9H), 0.94 (s, 9H), 0.90-0.73 (m, 2H), 0.46 (s, 3H);  $^{13}\text{C}$  NMR (100 MHz, Chloroform-*d*)  $\delta$  170.7, 161.3, 160.7, 150.3, 142.0, 136.0, 131.3, 128.2, 126.7, 124.8, 113.6, 79.8, 55.1, 36.7, 34.6, 31.5, 27.7, 21.4, 11.5, -3.1; IR (KBr,  $\text{cm}^{-1}$ ): 2961.9, 1689.4, 1592.7, 1503.1, 1364.8, 1278.3, 1245.8, 1158.1, 1111.2, 801.1; HRMS (ESI-TOF)  $m/z$ :  $[\text{M} + \text{Na}]^+$  calculated for  $\text{C}_{28}\text{H}_{38}\text{NaO}_3\text{Si}$ : 473.2482, found: 473.2467.

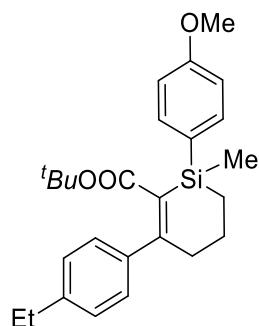

**Tert-butyl 3-(4-ethylphenyl)-1-(4-methoxyphenyl)-1-methyl-1,4,5,6-tetrahydrosilane-2-carboxylate (3j):**

Yellow oil (78.4 mg, 93% yield).  $^1\text{H}$  NMR (400 MHz, Chloroform-*d*)  $\delta$  7.49 (d,  $J = 8.4$  Hz, 2H), 7.10-7.02 (m, 4H), 6.83 (d,  $J = 8.5$  Hz, 2H), 3.72 (s, 3H), 2.59-2.49 (m, 3H), 2.47-2.37 (m, 1H), 1.93-1.82 (m, 2H), 1.14 (t,  $J = 7.6$  Hz, 3H), 0.97 (s, 9H), 0.95-0.90 (m, 1H), 0.83-0.75 (m, 1H), 0.46 (s, 3H);  $^{13}\text{C}$  NMR (100 MHz, Chloroform-*d*)  $\delta$  170.6, 161.7, 160.6, 143.5, 142.2, 136.0, 131.1, 128.2, 127.5, 126.9, 113.5, 79.8, 55.1, 36.9, 28.7, 27.7, 21.3, 15.8, 11.5, -3.2; IR (KBr,  $\text{cm}^{-1}$ ): 2965.8, 1690.0, 1592.7, 1503.1, 1365.5, 1278.6, 1246.1, 1156.8, 1111.2, 802.4; HRMS (ESI-TOF)  $m/z$ :  $[\text{M} + \text{Na}]^+$  calculated for  $\text{C}_{26}\text{H}_{34}\text{NaO}_3\text{Si}$ : 445.2169, found: 445.2175.

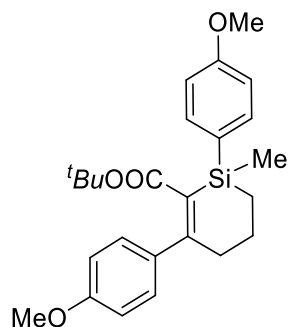

**Tert-butyl 1,3-bis(4-methoxyphenyl)-1-methyl-1,4,5,6-tetrahydrosilane-2-**

**carboxylate (3k):**

Colorless oil (74.9 mg, 88% yield).  $^1\text{H}$  NMR (400 MHz, Chloroform-*d*)  $\delta$  7.48 (d,  $J = 8.4$  Hz, 2H), 7.10 (d,  $J = 8.6$  Hz, 2H), 6.83 (d,  $J = 8.5$  Hz, 2H), 6.75 (d,  $J = 8.6$  Hz, 2H), 3.72 (d,  $J = 2.7$  Hz, 6H), 2.59-2.35 (m, 2H), 1.93-1.80 (m, 2H), 1.00 (s, 9H), 0.98-0.88 (m, 1H), 0.83-0.74 (m, 1H), 0.46 (s, 3H);  $^{13}\text{C}$  NMR (100 MHz, Chloroform-*d*)  $\delta$  170.7, 161.1, 160.6, 159.1, 137.3, 136.0, 130.9, 128.2, 128.2, 113.5, 113.4, 79.9, 55.3, 55.1, 36.9, 27.8, 21.4, 11.6, -3.2; IR (KBr,  $\text{cm}^{-1}$ ): 2907.6, 1688.3, 1592.6, 1503.9, 1278.6, 1244.5, 1154.9, 1110.5, 1029.7, 802.0; HRMS (ESI-TOF)  $m/z$ :  $[\text{M}^+ \text{Na}]^+$  calculated for  $\text{C}_{25}\text{H}_{32}\text{NaO}_4\text{Si}$ : 447.1962, found: 447.1951.

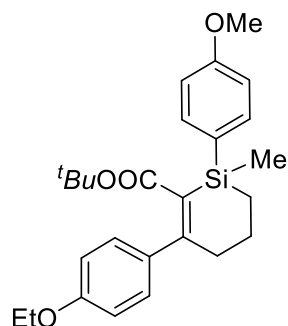**Tert-butyl 3-(4-ethoxyphenyl)-1-(4-methoxyphenyl)-1-methyl-1,4,5,6-tetrahydro-silole-2-carboxylate (3l):**

Colorless oil (82.9 mg, 95% yield).  $^1\text{H}$  NMR (400 MHz, Chloroform-*d*)  $\delta$  7.48 (d,  $J = 8.5$  Hz, 2H), 7.09 (d,  $J = 8.7$  Hz, 2H), 6.83 (d,  $J = 8.5$  Hz, 2H), 6.74 (d,  $J = 8.7$  Hz, 2H), 3.94 (q,  $J = 7.0$  Hz, 2H), 3.72 (s, 3H), 2.57-2.37 (m, 2H), 1.91-1.83 (m, 2H), 1.32 (t,  $J = 7.0$  Hz, 3H), 1.00 (s, 9H), 0.99-0.89 (m, 1H), 0.82-0.73 (m, 1H), 0.45 (s, 3H);  $^{13}\text{C}$  NMR (100 MHz, Chloroform-*d*)  $\delta$  170.8, 161.1, 160.6, 158.4, 137.2, 136.0, 130.9, 128.2, 128.2, 113.9, 113.5, 79.9, 63.5, 55.1, 36.9, 27.8, 21.4, 14.9, 11.6, -3.2; IR (KBr,  $\text{cm}^{-1}$ ): 2975.9, 1689.2, 1593.0, 1477.2, 1278.9, 1243.8, 1155.9, 1111.3, 804.2; HRMS (ESI-TOF)  $m/z$ :  $[\text{M}^+ \text{Na}]^+$  calculated for  $\text{C}_{26}\text{H}_{34}\text{NaO}_4\text{Si}$ : 461.2119, found: 461.2122.

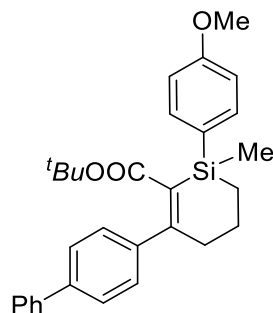

**Tert-butyl 3-([1,1'-biphenyl]-4-yl)-1-(4-methoxyphenyl)-1-methyl-1,4,5,6-tetrahydrosilole-2-carboxylate (3m):**

Yellow oil (86.8 mg, 92% yield).  $^1\text{H}$  NMR (400 MHz, Chloroform-*d*)  $\delta$  7.52-7.48 (m, 4H), 7.45 (d,  $J = 8.3$  Hz, 2H), 7.34 (t,  $J = 7.6$  Hz, 2H), 7.27-7.20 (m, 3H), 6.83 (d,  $J = 8.5$  Hz, 2H), 3.71 (s, 3H), 2.62-2.41 (m, 2H), 1.96-1.85 (m, 2H), 0.97 (s, 9H), 0.95-0.76 (m, 2H), 0.48 (s, 3H);  $^{13}\text{C}$  NMR (100 MHz, Chloroform-*d*)  $\delta$  170.5, 161.0, 160.7, 143.9, 141.0, 140.2, 136.0, 131.7, 128.8, 127.9, 127.4, 127.3, 127.1, 126.7, 113.5, 80.0, 55.1, 36.8, 27.8, 21.3, 11.5, -3.2; IR (KBr,  $\text{cm}^{-1}$ ): 2922.8, 1688.9, 1592.3, 1502.6, 1278.4, 1246.1, 1155.8, 1110.9, 801.2, 759.9, 696.4; HRMS (ESI-TOF)  $m/z$ :  $[\text{M}^+ \text{Na}]^+$  calculated for  $\text{C}_{30}\text{H}_{34}\text{NaO}_3\text{Si}$ : 493.2169, found: 493.2154.

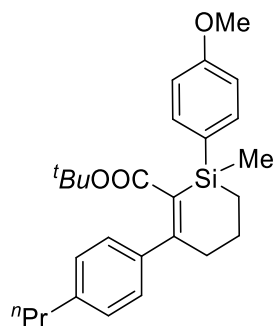

**Tert-butyl 1-(4-methoxyphenyl)-1-methyl-3-(4-propylphenyl)-1,4,5,6-tetrahydrosilole-2-carboxylate (3ae):**

Yellow oil (72.8 mg, 83% yield).  $^1\text{H}$  NMR (400 MHz, Chloroform-*d*)  $\delta$  7.49 (d,  $J = 8.4$  Hz, 2H), 7.04 (q,  $J = 8.1$  Hz, 4H), 6.83 (d,  $J = 8.4$  Hz, 2H), 3.72 (s, 3H), 2.56-2.41 (m, 4H), 1.95-1.82 (m, 2H), 1.54 (q,  $J = 7.5$  Hz, 2H), 0.96 (s, 9H), 0.93-0.75 (m, 5H), 0.46 (s, 3H);  $^{13}\text{C}$  NMR (100 MHz, Chloroform-*d*)  $\delta$  170.7, 161.4, 160.6, 142.2, 141.9, 136.0, 131.1, 128.1, 126.8, 113.5, 79.8, 55.1, 37.9, 36.8, 27.7, 24.7, 21.3, 13.9, 11.5, -3.2; IR (KBr,  $\text{cm}^{-1}$ ): 2927.7, 1691.1, 1592.8, 1564.2, 1278.2, 1246.4, 1157.5, 1111.2, 1031.7, 805.5; HRMS (ESI-TOF)  $m/z$ :  $[\text{M}^+ \text{Na}]^+$  calculated for  $\text{C}_{27}\text{H}_{36}\text{NaO}_3\text{Si}$ : 459.2326, found: 459.2315.

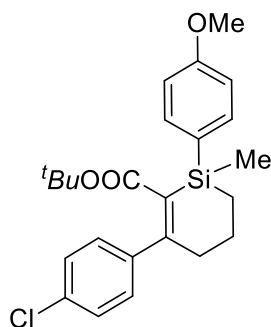

**Tert-butyl 3-(4-chlorophenyl)-1-(4-methoxyphenyl)-1-methyl-1,4,5,6-tetrahydro-silole-2-carboxylate (3o):**

Light yellow oil (69.5 mg, 81% yield).  $^1\text{H}$  NMR (400 MHz, Chloroform-*d*)  $\delta$  7.47 (d,  $J = 8.5$  Hz, 2H), 7.20 (d,  $J = 8.5$  Hz, 2H), 7.09 (d,  $J = 8.4$  Hz, 2H), 6.83 (d,  $J = 8.5$  Hz, 2H), 3.73 (s, 3H), 2.55-2.35 (m, 2H), 1.93-1.84 (m, 2H), 0.99 (s, 9H), 0.97-0.89 (m, 1H), 0.84-0.75 (m, 1H), 0.46 (s, 3H);  $^{13}\text{C}$  NMR (100 MHz, Chloroform-*d*)  $\delta$  170.2, 160.7, 160.0, 143.3, 136.0, 133.1, 132.3, 128.3, 128.2, 127.7, 113.6, 80.2, 55.1, 36.8, 27.8, 21.3, 11.4, -3.3; IR (KBr,  $\text{cm}^{-1}$ ): 2925.3, 1693.1, 1592.9, 1503.0, 1278.8, 1181.9, 1111.1, 800.6; HRMS (ESI-TOF)  $m/z$ :  $[\text{M}^+ \text{Na}]^+$  calculated for  $\text{C}_{24}\text{H}_{29}\text{ClNaO}_3\text{Si}$ : 451.1467, found: 451.1459.

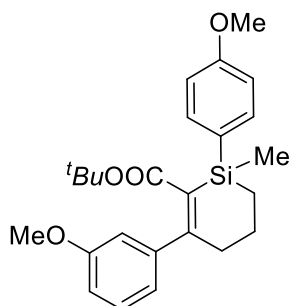

**Tert-butyl 3-(3-methoxyphenyl)-1-(4-methoxyphenyl)-1-methyl-1,4,5,6-tetrahydro-silole-2-carboxylate (3p):**

Colorless oil (66.9 mg, 79% yield).  $^1\text{H}$  NMR (400 MHz, Chloroform-*d*)  $\delta$  7.49 (d,  $J = 8.5$  Hz, 2H), 7.13 (t,  $J = 7.8$  Hz, 1H), 6.83 (d,  $J = 8.5$  Hz, 2H), 6.77-6.66 (m, 3H), 3.72 (d,  $J = 5.4$  Hz, 6H), 2.59-2.37 (m, 2H), 1.88 (t,  $J = 5.9$  Hz, 2H), 0.97 (s, 9H), 0.98-0.89 (m, 1H), 0.86-0.77 (m, 1H), 0.46 (s, 3H);  $^{13}\text{C}$  NMR (100 MHz, Chloroform-*d*)  $\delta$  170.4, 161.1, 160.7, 159.3, 146.3, 136.0, 131.5, 129.1, 127.9, 119.4, 113.5, 113.0, 112.3, 79.9, 55.3, 55.1, 36.8, 27.7, 21.3, 11.4, -3.2; IR (KBr,  $\text{cm}^{-1}$ ): 2924.7, 1690.3, 1592.0, 1503.0, 1278.6, 1246.1, 1156.3, 1110.9, 1031.1, 806.1; HRMS (ESI-TOF)  $m/z$ :  $[\text{M}^+ \text{Na}]^+$

calculated for C<sub>25</sub>H<sub>32</sub>NaO<sub>4</sub>Si: 447.1962, found: 447.1951.

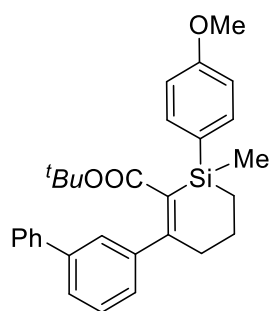

**Tert-butyl 3-([1,1'-biphenyl]-3-yl)-1-(4-methoxyphenyl)-1-methyl-1,4,5,6-tetrahydro-silole-2-carboxylate (3q):**

Colorless oil (81.6 mg, 86% yield). <sup>1</sup>H NMR (400 MHz, Chloroform-*d*)  $\delta$  7.50 (d,  $J$  = 8.4 Hz, 4H), 7.40 (d,  $J$  = 9.1 Hz, 1H), 7.39-7.21 (m, 5H), 7.12 (d,  $J$  = 7.7 Hz, 1H), 6.83 (d,  $J$  = 8.5 Hz, 2H), 3.71 (s, 3H), 2.65-2.42 (m, 2H), 1.95-1.85 (m, 2H), 1.02-0.95 (m, 1H), 0.92 (s, 9H), 0.87-0.76 (m, 1H), 0.48 (s, 3H); <sup>13</sup>C NMR (100 MHz, Chloroform-*d*)  $\delta$  170.5, 161.1, 160.7, 145.5, 141.1, 141.0, 136.0, 131.8, 128.8, 128.5, 127.9, 127.4, 127.3, 126.0, 125.8, 125.7, 113.6, 80.0, 55.1, 36.9, 27.7, 21.3, 11.4, -3.2; IR (KBr, cm<sup>-1</sup>): 2924.9, 1691.7, 1592.1, 1502.7, 1246.3, 1155.6, 1111.1, 802.9, 755.3, 703.4; HRMS (ESI-TOF)  $m/z$ : [M+ Na]<sup>+</sup> calculated for C<sub>30</sub>H<sub>34</sub>NaO<sub>3</sub>Si: 493.2169, found: 493.2172.

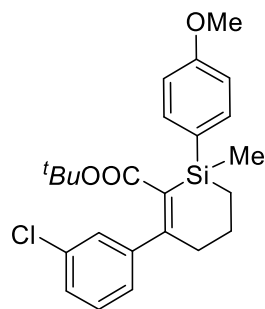

**Tert-butyl 3-(3-chlorophenyl)-1-(4-methoxyphenyl)-1-methyl-1,4,5,6-tetrahydro-silole-2-carboxylate (3r):**

Colorless oil (45.9 mg, 53% yield). <sup>1</sup>H NMR (400 MHz, Chloroform-*d*)  $\delta$  7.48 (d,  $J$  = 8.5 Hz, 2H), 7.19-7.15 (m, 3H), 7.07-7.00 (m, 1H), 6.84 (d,  $J$  = 8.5 Hz, 2H), 3.73 (s, 3H), 2.57-2.33 (m, 2H), 1.94-1.82 (m, 2H), 0.99 (s, 9H), 0.97-0.90 (m, 1H), 0.85-0.77 (m, 1H), 0.47 (s, 3H); <sup>13</sup>C NMR (100 MHz, Chloroform-*d*)  $\delta$  170.1, 160.8, 159.3, 146.5, 136.0, 133.9, 132.7, 129.4, 127.6, 127.4, 127.1, 125.0, 113.6, 80.3, 55.2, 36.6, 27.8, 21.2, 11.3, -3.3; IR (KBr, cm<sup>-1</sup>): 2925.2, 1693.4, 1592.0, 1503.0, 1278.8, 1246.3,

1155.6, 1111.2, 803.6, 779.8, 696.0; HRMS (ESI-TOF)  $m/z$ :  $[M+Na]^+$  calculated for  $C_{24}H_{29}ClNaO_3Si$ : 451.1467, found: 451.1483.

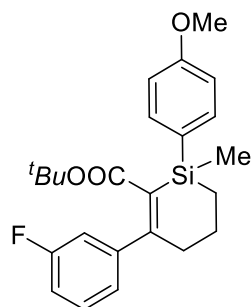

**Tert-butyl 3-(3-fluorophenyl)-1-(4-methoxyphenyl)-1-methyl-1,4,5,6-tetrahydro-silole-2-carboxylate (3s):**

Yellow oil (47.7 mg, 57% yield).  $^1H$  NMR (400 MHz, Chloroform-*d*)  $\delta$  7.48 (d,  $J = 8.5$  Hz, 2H), 7.22-7.16 (m, 1H), 6.95-6.82 (m, 5H), 3.73 (s, 3H), 2.56-2.35 (m, 2H), 1.94-1.84 (m, 2H), 0.99 (s, 9H), 0.96-0.89 (m, 1H), 0.85-0.78 (m, 1H), 0.47 (s, 3H);  $^{13}C$  NMR (100 MHz, Chloroform-*d*)  $\delta$  170.2, 163.8, 161.4, 160.8, 159.5, 147.0 (d,  $J = 7.3$  Hz), 136.0, 132.5, 129.6 (d,  $J = 8.1$  Hz), 127.6, 122.6 (d,  $J = 2.9$  Hz), 114.1 (dd,  $J = 21.3, 11.7$  Hz), 113.6, 80.2, 55.2, 36.6, 27.7, 21.2, 11.3, -3.3; IR (KBr,  $cm^{-1}$ ): 2928.3, 1694.0, 1592.8, 1503.4, 1279.3, 1246.8, 1152.9, 1111.9, 945.7, 810.8; HRMS (ESI-TOF)  $m/z$ :  $[M+Na]^+$  calculated for  $C_{24}H_{29}FNaO_3Si$ : 435.1762, found: 435.1747.

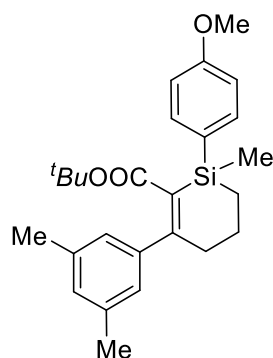

**Tert-butyl 3-(3,5-dimethylphenyl)-1-(4-methoxyphenyl)-1-methyl-1,4,5,6-tetrahydro-silole-2-carboxylate (3t):**

Yellow oil (70.5 mg, 84% yield).  $^1H$  NMR (400 MHz, Chloroform-*d*)  $\delta$  7.49 (d,  $J = 8.6$  Hz, 2H), 6.86-6.81 (m, 3H), 6.77 (d,  $J = 1.7$  Hz, 2H), 3.72 (s, 3H), 2.59-2.37 (m, 2H), 2.20 (s, 6H), 1.92-1.82 (m, 2H), 0.98 (s, 9H), 0.96-0.90 (m, 1H), 0.81-0.75 (m, 1H), 0.46 (s, 3H);  $^{13}C$  NMR (100 MHz, Chloroform-*d*)  $\delta$  170.7, 161.8, 160.6, 144.8, 137.4,

136.0, 131.1, 129.0, 128.1, 124.6, 113.5, 79.8, 55.1, 36.8, 27.7, 21.4, 21.3, 11.5, -3.1; IR (KBr,  $\text{cm}^{-1}$ ): 2915.8, 1690.9, 1592.6, 1503.1, 1277.8, 1246.3, 1156.3, 1111.4, 804.4; HRMS (ESI-TOF)  $m/z$ :  $[\text{M}^+ \text{Na}]^+$  calculated for  $\text{C}_{26}\text{H}_{34}\text{NaO}_3\text{Si}$ : 445.2169, found: 445.2172.

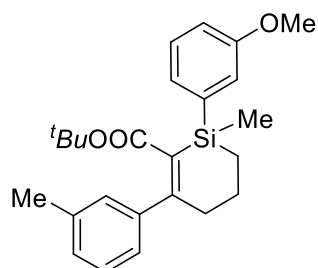

**Tert-butyl 1-(3-methoxyphenyl)-1-methyl-3-(m-tolyl)-1,4,5,6-tetrahydrosilole-2-carboxylate (3u):**

Colorless oil (45 mg, 55% yield).  $^1\text{H}$  NMR (400 MHz, Chloroform-*d*)  $\delta$  7.24-7.19 (m, 1H), 7.18-7.07 (m, 3H), 7.02-6.91 (m, 3H), 6.86-6.78 (m, 1H), 3.74 (s, 3H), 2.60-2.36 (m, 2H), 2.24 (s, 3H), 1.93-1.83 (m, 2H), 0.97 (s, 9H), 0.88-0.74 (m, 2H), 0.48 (s, 3H);  $^{13}\text{C}$  NMR (100 MHz, Chloroform-*d*)  $\delta$  170.4, 162.3, 159.0, 144.8, 139.0, 137.5, 130.8, 128.9, 128.1, 128.0, 127.6, 126.8, 123.9, 120.0, 114.5, 79.9, 55.2, 36.9, 27.7, 21.5, 21.3, 11.3, -3.3; IR (KBr,  $\text{cm}^{-1}$ ): 2922.1, 1690.8, 1570.5, 1282.8, 1245.0, 1228.2, 1155.8, 779.3, 695.2; HRMS (ESI-TOF)  $m/z$ :  $[\text{M}^+ \text{Na}]^+$  calculated for  $\text{C}_{25}\text{H}_{32}\text{NaO}_3\text{Si}$ : 431.2013, found: 431.2004.

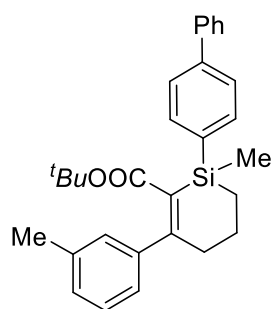

**Tert-butyl 1-([1,1'-biphenyl]-4-yl)-1-methyl-3-(m-tolyl)-1,4,5,6-tetrahydrosilole-2-carboxylate (3v):**

Colorless oil (66.1 mg, 73% yield).  $^1\text{H}$  NMR (400 MHz, Chloroform-*d*)  $\delta$  7.64 (d,  $J$  = 8.1 Hz, 2H), 7.55-7.47 (m, 4H), 7.34 (t,  $J$  = 7.6 Hz, 2H), 7.29-7.20 (m, 1H), 7.16-7.07 (m, 1H), 7.02-6.92 (m, 3H), 2.59-2.43 (m, 2H), 2.24 (s, 3H), 1.95-1.86 (m, 2H), 1.07-1.00 (m, 1H), 0.97 (s, 9H), 0.89-0.77 (m, 1H), 0.51 (s, 3H);  $^{13}\text{C}$  NMR (100 MHz,



Chloroform-*d*)  $\delta$  170.5, 162.2, 144.8, 142.0, 141.3, 137.5, 136.1, 135.0, 130.9, 128.9, 128.1, 128.0, 127.6, 127.4, 127.3, 126.5, 123.9, 80.0, 36.9, 27.7, 21.5, 21.3, 11.3, -3.3; IR (KBr,  $\text{cm}^{-1}$ ): 2921.1, 1689.1, 1365.5, 1246.8, 1156.4, 804.8, 755.9, 697.6; HRMS (ESI-TOF)  $m/z$ :  $[\text{M}^+ \text{Na}]^+$  calculated for  $\text{C}_{30}\text{H}_{34}\text{NaO}_2\text{Si}$ : 477.2220, found: 477.2201.

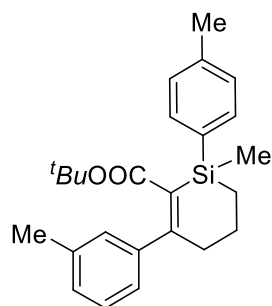

**Tert-butyl 1-methyl-3-(m-tolyl)-1-(p-tolyl)-1,4,5,6-tetrahydrosilane-2-carboxylate (3w):**

Colorless oil (46 mg, 59% yield).  $^1\text{H}$  NMR (400 MHz, Chloroform-*d*)  $\delta$  7.46 (d,  $J = 7.6$  Hz, 2H), 7.13-7.07 (m, 3H), 7.02-6.91 (m, 3H), 2.57-2.39 (m, 2H), 2.25 (d,  $J = 7.7$  Hz, 6H), 1.93-1.81 (m, 2H), 0.97 (s, 9H), 0.95-0.92 (m, 1H), 0.83-0.73 (m, 1H), 0.47 (s, 3H);  $^{13}\text{C}$  NMR (100 MHz, Chloroform-*d*)  $\delta$  170.5, 161.8, 144.9, 139.1, 137.5, 134.5, 133.6, 131.1, 128.6, 128.1, 128.0, 127.6, 123.9, 79.9, 36.9, 27.7, 21.6, 21.5, 21.3, 11.4, -3.2; IR (KBr,  $\text{cm}^{-1}$ ): 2917.4, 1691.7, 1246.3, 1157.1, 781.6; HRMS (ESI-TOF)  $m/z$ :  $[\text{M}^+ \text{Na}]^+$  calculated for  $\text{C}_{25}\text{H}_{32}\text{NaO}_2\text{Si}$ : 415.2064, found: 415.2052.

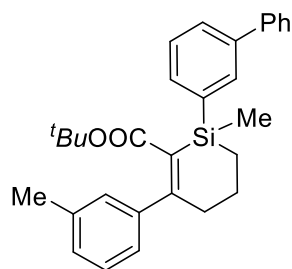

**Tert-butyl 1-([1,1'-biphenyl]-3-yl)-1-methyl-3-(m-tolyl)-1,4,5,6-tetrahydrosilane-2-carboxylate (3x):**

Colorless oil (47.2 mg, 52% yield).  $^1\text{H}$  NMR (400 MHz, Chloroform-*d*)  $\delta$  7.75 (s, 1H), 7.59-7.46 (m, 4H), 7.40-7.30 (m, 3H), 7.30-7.20 (m, 3H), 7.16-7.07 (m, 1H), 7.02-6.92 (m, 3H), 2.59-2.52 (m, 1H), 2.49-2.40 (m, 1H), 2.24 (s, 3H), 1.94-1.87 (m, 2H), 1.05-0.95 (m, 1H), 0.94 (s, 9H), 0.90-0.77 (m, 1H), 0.53 (s, 3H);  $^{13}\text{C}$  NMR (100 MHz, Chloroform-*d*)  $\delta$  170.5, 162.4, 144.8, 141.7, 140.5, 137.9, 137.5, 133.5, 133.2, 130.8,

128.8, 128.2, 128.0, 127.7, 127.4, 127.3, 123.9, 80.0, 36.9, 27.7, 21.5, 21.4, 11.4, -3.2; IR (KBr,  $\text{cm}^{-1}$ ): 2920.2, 1689.7, 1246.2, 1155.7, 812.9, 752.1, 699.9; HRMS (ESI-TOF)  $m/z$ :  $[\text{M}^+ \text{Na}]^+$  calculated for  $\text{C}_{30}\text{H}_{34}\text{NaO}_2\text{Si}$ : 477.2220, found: 477.2222.

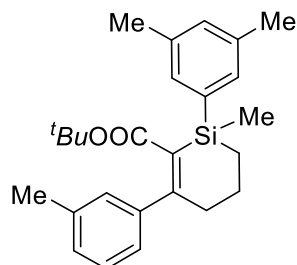

**Tert-butyl 1-(3,5-dimethylphenyl)-1-methyl-3-(m-tolyl)-1,4,5,6-tetrahydrosilole-2-carboxylate (3y):**

Colorless oil (38 mg, 47% yield).  $^1\text{H}$  NMR (400 MHz, Chloroform-*d*)  $\delta$  7.17-7.10 (m, 3H), 7.03-6.89 (m, 4H), 2.61-2.52 (m, 1H), 2.45-2.37 (m, 1H), 2.24 (d,  $J = 4.2$  Hz, 9H), 1.93-1.85 (m, 2H), 1.05-1.01 (m, 1H), 0.98 (s, 9H), 0.83-0.77 (m, 1H), 0.48 (s, 3H);  $^{13}\text{C}$  NMR (100 MHz, Chloroform-*d*)  $\delta$  170.7, 161.7, 144.9, 137.5, 136.9, 136.9, 132.1, 131.2, 131.0, 128.1, 128.0, 127.7, 123.9, 79.8, 36.9, 27.7, 21.5, 21.4, 11.2, 1.2, -2.9; IR (KBr,  $\text{cm}^{-1}$ ): 2918.5, 1691.9, 1365.2, 1246.0, 1157.6, 1139.9, 781.2; HRMS (ESI-TOF)  $m/z$ :  $[\text{M}^+ \text{Na}]^+$  calculated for  $\text{C}_{26}\text{H}_{34}\text{NaO}_2\text{Si}$ : 429.2220, found: 429.2229.

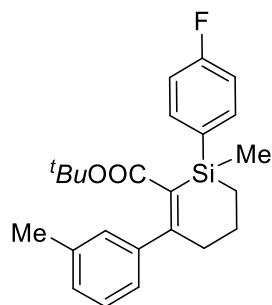

**Tert-butyl 1-(4-fluorophenyl)-1-methyl-3-(m-tolyl)-1,4,5,6-tetrahydrosilole-2-carboxylate (3z):**

Colorless oil (53.6 mg, 68% yield).  $^1\text{H}$  NMR (400 MHz, Chloroform-*d*)  $\delta$  7.57-7.51 (m, 2H), 7.12 (t,  $J = 7.5$  Hz, 1H), 7.03-6.91 (m, 5H), 2.58-2.51 (m, 1H), 2.48-2.39 (m, 1H), 2.24 (s, 3H), 1.95-1.80 (m, 2H), 0.96 (s, 9H), 0.93-0.90 (m, 1H), 0.85-0.78 (m, 1H), 0.48 (s, 3H);  $^{13}\text{C}$  NMR (100 MHz, Chloroform-*d*)  $\delta$  170.4, 165.2, 162.7, 162.4, 144.7, 137.5, 136.5, 136.4, 132.8, 132.8, 130.7, 128.2, 128.0, 127.6, 123.8, 115.0, 114.8, 80.0, 36.8, 27.7, 21.5, 21.3, 11.4, -3.3; IR (KBr,  $\text{cm}^{-1}$ ): 2922.7, 1689.5, 1587.1, 1231.2,

1160.4, 812.8, 782.1; HRMS (ESI-TOF)  $m/z$ :  $[M+Na]^+$  calculated for  $C_{24}H_{29}FNaO_2Si$ : 419.1813, found: 419.1802.

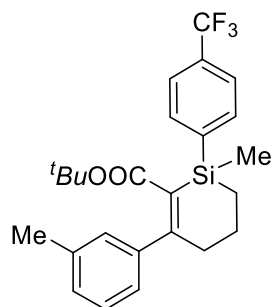

**Tert-butyl 1-methyl-3-(m-tolyl)-1-(4-(trifluoromethyl)phenyl)-1,4,5,6-tetrahydro-2-carboxylate (3aa):**

Colorless oil (28 mg, 31% yield).  $^1H$  NMR (400 MHz, Chloroform-*d*)  $\delta$  7.69 (d,  $J = 7.3$  Hz, 2H), 7.52 (d,  $J = 7.1$  Hz, 2H), 7.13 (t,  $J = 7.5$  Hz, 1H), 7.01 (d,  $J = 7.6$  Hz, 1H), 6.95 (d,  $J = 9.1$  Hz, 2H), 2.61-2.41 (m, 2H), 2.26 (s, 3H), 1.97-1.80 (m, 2H), 0.96 (s, 9H), 0.95-0.79 (m, 2H), 0.51 (s, 3H);  $^{13}C$  NMR (100 MHz, Chloroform-*d*)  $\delta$  170.2, 163.5, 144.6, 142.7, 137.6, 134.8, 129.9, 128.3, 128.1, 127.6, 124.3, 124.3, 124.3, 124.2, 123.8, 80.3, 36.9, 27.7, 21.5, 21.2, 11.1, -3.5; IR (KBr,  $cm^{-1}$ ): 2924.2, 1688.5, 1323.5, 1158.6, 1124.6, 1059.3, 805.4, 698.3; HRMS (ESI-TOF)  $m/z$ :  $[M+Na]^+$  calculated for  $C_{25}H_{29}F_3NaO_2Si$ : 469.1781, found: 469.1783.

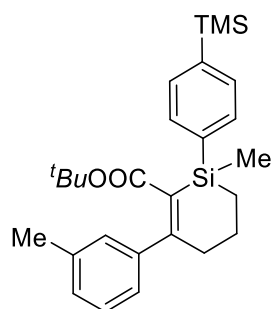

**Tert-butyl 1-methyl-3-(m-tolyl)-1-(4-(trimethylsilyl)phenyl)-1,4,5,6-tetrahydro-2-carboxylate (3ab):**

Colorless oil (37.8 mg, 42% yield).  $^1H$  NMR (400 MHz, Chloroform-*d*)  $\delta$  7.55 (d,  $J = 7.2$  Hz, 2H), 7.43 (d,  $J = 7.9$  Hz, 2H), 7.12 (t,  $J = 7.5$  Hz, 1H), 7.03-6.89 (m, 3H), 2.58-2.38 (m, 2H), 2.25 (s, 3H), 1.95-1.83 (m, 2H), 1.05-0.97 (m, 1H), 0.96 (s, 9H), 0.86-0.75 (m, 1H), 0.48 (s, 3H), 0.18 (s, 9H);  $^{13}C$  NMR (100 MHz, Chloroform-*d*)  $\delta$  170.5, 161.9, 144.9, 141.5, 137.8, 137.5, 133.7, 132.6, 131.0, 128.1, 128.0, 127.6, 123.9, 80.0,

36.9, 27.7, 21.5, 21.3, 11.1, -1.1, -3.4; IR (KBr,  $\text{cm}^{-1}$ ): 2954.7, 1692.2, 1247.2, 1157.6, 1134.2, 837.4, 800.5, 782.5, 752.7; HRMS (ESI-TOF)  $m/z$ :  $[\text{M}^+ \text{Na}]^+$  calculated for  $\text{C}_{27}\text{H}_{38}\text{NaO}_2\text{Si}_2$ : 473.2303, found: 473.2299.

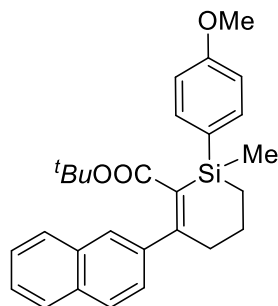

**Tert-butyl 1-(4-methoxyphenyl)-1-methyl-3-(naphthalen-2-yl)-1,4,5,6-tetrahydro-silole-2-carboxylate (3ac):**

White solid (81.9 mg, 92% yield), mp 79 - 83 °C,  $^1\text{H}$  NMR (400 MHz, Chloroform-*d*)  $\delta$  7.75-7.66 (m, 3H), 7.61 (s, 1H), 7.52 (d,  $J = 8.5$  Hz, 2H), 7.39-7.31 (m, 2H), 7.29 (dd,  $J = 8.5, 1.8$  Hz, 1H), 6.84 (d,  $J = 8.5$  Hz, 2H), 3.71 (s, 3H), 2.66-2.59 (m, 1H), 2.55-2.47 (m, 1H), 1.97-1.88 (m, 2H), 1.03-0.95 (m, 1H), 0.88 (s, 9H), 0.84-0.75 (m, 1H), 0.50 (s, 3H).  $^{13}\text{C}$  NMR (100 MHz, Chloroform-*d*)  $\delta$  170.6, 161.2, 160.7, 142.3, 136.0, 133.2, 132.7, 132.1, 128.1, 127.9, 127.7, 127.6, 126.2, 125.9, 125.5, 125.4, 113.6, 80.0, 55.1, 36.8, 27.7, 21.4, 11.5, -3.1. IR (KBr,  $\text{cm}^{-1}$ ): 2914.7, 1688.1, 1592.3, 1502.6, 1278.4, 1245.9, 1155.5, 1111.0, 806.5, 745.6; HRMS (ESI-TOF)  $m/z$ :  $[\text{M}^+ \text{Na}]^+$  calculated for  $\text{C}_{28}\text{H}_{32}\text{NaO}_3\text{Si}$ : 467.2013, found: 467.2010.

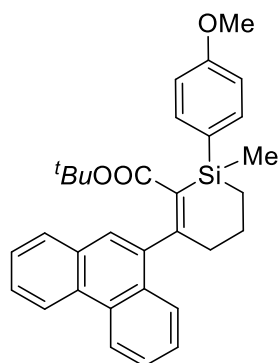

**Tert-butyl 1-(4-methoxyphenyl)-1-methyl-3-(phenanthren-9-yl)-1,4,5,6-tetrahydro-silole-2-carboxylate (3ad):**

Yellow oil (37.0 mg, 37% yield), mp 104 - 108 °C,  $^1\text{H}$  NMR (400 MHz, Chloroform-*d*)  $\delta$  8.66-8.53 (m, 2H), 7.85-7.71 (m, 2H), 7.63-7.46 (m, 6H), 7.40 (d,  $J = 11.7$  Hz, 1H),

6.92-6.86 (m, 2H), 3.75 (s, 3H), 2.68-2.38 (m, 2H), 2.06-1.92 (m, 2H), 1.13-0.84 (m, 2H), 0.64-0.45 (m, 12H).  $^{13}\text{C}$  NMR (100 MHz, Chloroform-*d*)  $\delta$  169.8 (d,  $J = 46.1$  Hz), 161.5 (d,  $J = 37.3$  Hz), 160.7, 141.6 (d,  $J = 24.2$  Hz), 136.0, 135.9, 133.4, 131.7 (d,  $J = 7.2$  Hz), 130.4 (d,  $J = 3.0$  Hz), 130.1, 130.0-129.7 (m), 128.6 (d,  $J = 3.5$  Hz), 128.3, 128.1, 126.9, 126.8 (d,  $J = 3.7$  Hz), 126.7 (d,  $J = 4.1$  Hz), 126.4 (d,  $J = 4.5$  Hz), 124.1, 123.8, 122.9 (d,  $J = 4.6$  Hz), 122.6, 113.7, 79.7, 55.2, 37.3 (d,  $J = 50.2$  Hz), 27.3 (d,  $J = 7.2$  Hz), 21.5, 11.8 (d,  $J = 10.5$  Hz), -2.8 (d,  $J = 50.5$  Hz). IR (KBr,  $\text{cm}^{-1}$ ): 2922.6, 1697.2, 1590.8, 1277.7, 1246.9, 1160.6, 1110.4, 1028.3, 810.5, 758.3, 726.9; HRMS (ESI-TOF)  $m/z$ :  $[\text{M} + \text{Na}]^+$  calculated for  $\text{C}_{32}\text{H}_{34}\text{NaO}_3\text{Si}$ : 517.2169, found: 517.2159.

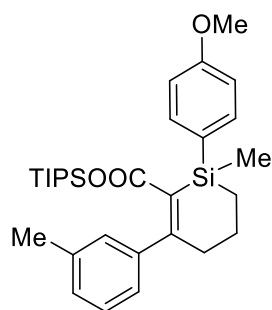

**Triisopropylsilyl 1-(4-methoxyphenyl)-1-methyl-3-(m-tolyl)-1,4,5,6-tetrahydro-silole-2-carboxylate (3ae):**

Colorless oil (45.7 mg, 45% yield).  $^1\text{H}$  NMR (400 MHz, Chloroform-*d*)  $\delta$  7.50 (d,  $J = 8.5$  Hz, 2H), 7.10 (t,  $J = 7.9$  Hz, 1H), 6.99-6.93 (m, 3H), 6.82 (d,  $J = 8.5$  Hz, 2H), 3.73 (s, 3H), 2.57-2.47 (m, 1H), 2.46-2.36 (m, 1H), 2.23 (s, 3H), 1.91-1.81 (m, 2H), 0.93-0.76 (m, 5H), 0.72-0.64 (m, 18H), 0.51 (s, 3H);  $^{13}\text{C}$  NMR (100 MHz, Chloroform-*d*)  $\delta$  171.2, 162.4, 160.8, 145.3, 137.8 136.1, 131.1, 128.2, 128.2, 128.1, 127.6, 124.0, 113.7, 55.2, 37.8, 21.5, 21.3, 17.8, 12.2, 12.1, 1.2, -3.4; IR (KBr,  $\text{cm}^{-1}$ ): 2923.9, 2865.9, 1686.7, 1593.1, 1502.8, 1279.2, 1245.7, 1111.9, 802.8, 705.0; HRMS (ESI-TOF)  $m/z$ :  $[\text{M} + \text{Na}]^+$  calculated for  $\text{C}_{30}\text{H}_{44}\text{NaO}_3\text{Si}_2$ : 531.2721, found: 531.2725.

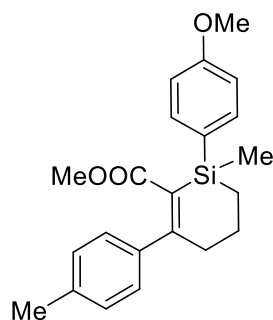

**Methyl 1-(4-methoxyphenyl)-1-methyl-3-(p-tolyl)-1,4,5,6-tetrahydrosilole-2-carboxylate (3af):**

Light yellow oil (52.8 mg, 72% yield).  $^1\text{H}$  NMR (400 MHz, Chloroform-*d*)  $\delta$  7.56 (d,  $J = 8.5$  Hz, 2H), 7.13 (s, 4H), 6.94 (d,  $J = 8.5$  Hz, 2H), 3.82 (s, 3H), 3.35 (s, 3H), 2.71-2.62 (m, 1H), 2.60-2.51 (m, 1H), 2.35 (s, 3H), 2.04-1.95 (m, 2H), 1.12-1.03 (m, 1H), 0.95-0.86 (m, 1H), 0.55 (s, 3H);  $^{13}\text{C}$  NMR (100 MHz, Chloroform-*d*)  $\delta$  171.9, 163.4, 160.7, 141.7, 137.4, 135.8, 129.4, 128.9, 127.8, 126.5, 113.7, 55.1, 51.1, 37.1, 21.3 (d,  $J = 4.4$  Hz), 11.3, -3.2; IR (KBr,  $\text{cm}^{-1}$ ): 2918.3, 1698.2, 1592.0, 1502.9, 1277.9, 1246.1, 1181.8, 1110.8, 798.8; HRMS (ESI-TOF)  $m/z$ :  $[\text{M} + \text{Na}]^+$  calculated for  $\text{C}_{22}\text{H}_{26}\text{NaO}_3\text{Si}$ : 389.1543, found: 389.1547.

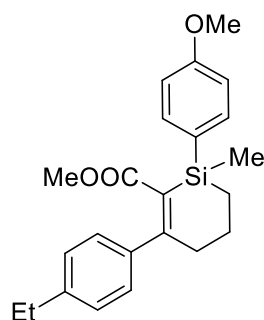

**Methyl 3-(4-ethylphenyl)-1-(4-methoxyphenyl)-1-methyl-1,4,5,6-tetrahydrosilole-2-carboxylate (3ag):**

Yellow oil (51 mg, 67% yield).  $^1\text{H}$  NMR (400 MHz, Chloroform-*d*)  $\delta$  7.57 (d,  $J = 8.5$  Hz, 2H), 7.16 (s, 4H), 6.94 (d,  $J = 8.5$  Hz, 2H), 3.82 (s, 3H), 3.35 (s, 3H), 2.71-2.53 (m, 4H), 2.05-1.95 (m, 2H), 1.25 (t,  $J = 7.6$  Hz, 3H), 1.10-1.03 (m, 1H), 0.96-0.86 (m, 1H), 0.56 (s, 3H);  $^{13}\text{C}$  NMR (100 MHz, Chloroform-*d*)  $\delta$  172.0, 163.2, 160.7, 143.7, 141.9, 135.8, 129.4, 127.8, 127.6, 126.6, 55.1, 51.1, 37.0, 28.6, 21.3, 15.5, 11.3, -3.2; IR (KBr,  $\text{cm}^{-1}$ ): 2928.9, 1698.5, 1591.9, 1502.9, 1277.9, 1246.3, 1181.9, 1110.9, 798.8; HRMS (ESI-TOF)  $m/z$ :  $[\text{M} + \text{Na}]^+$  calculated for  $\text{C}_{23}\text{H}_{28}\text{NaO}_3\text{Si}$ : 403.1700, found: 403.1690.

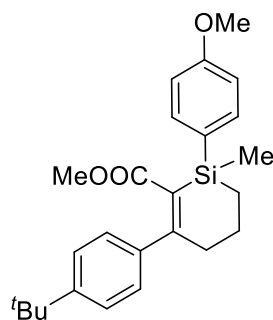

**Methyl 3-(4-(tert-butyl)phenyl)-1-(4-methoxyphenyl)-1-methyl-1,4,5,6-tetrahydrosilole-2-carboxylate (3ah):**

Yellow oil (51 mg, 62% yield).  $^1\text{H}$  NMR (400 MHz, Chloroform-*d*)  $\delta$  7.56 (d,  $J = 8.6$  Hz, 2H), 7.34 (d,  $J = 8.4$  Hz, 2H), 7.18 (d,  $J = 8.4$  Hz, 2H), 6.93 (d,  $J = 8.5$  Hz, 2H), 3.82 (s, 3H), 3.33 (s, 3H), 2.73-2.52 (m, 2H), 2.05-1.95 (m, 2H), 1.33 (s, 9H), 1.12-1.03 (m, 1H), 0.95-0.88 (m, 1H), 0.56 (s, 3H);  $^{13}\text{C}$  NMR (100 MHz, Chloroform-*d*)  $\delta$  172.0, 162.9, 160.7, 150.6, 141.5, 135.8, 129.4, 127.8, 126.3, 125.0, 113.7, 55.1, 51.0, 36.9, 34.6, 31.4, 21.3, 11.3, -3.2; IR (KBr,  $\text{cm}^{-1}$ ): 2956.8, 1699.9, 1592.1, 1503.2, 1278.1, 1247.1, 1115.2, 798.8; HRMS (ESI-TOF)  $m/z$ :  $[\text{M} + \text{Na}]^+$  calculated for  $\text{C}_{25}\text{H}_{32}\text{NaO}_3\text{Si}$ : 431.2013, found: 431.2014.

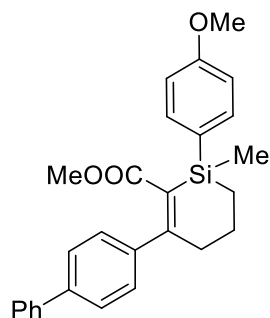

**Methyl 3-([1,1'-biphenyl]-4-yl)-1-(4-methoxyphenyl)-1-methyl-1,4,5,6-tetrahydrosilole-2-carboxylate (3ai):**

Yellow oil (40 mg, 47% yield).  $^1\text{H}$  NMR (400 MHz, Chloroform-*d*)  $\delta$  7.66-7.55 (m, 6H), 7.49-7.42 (m, 2H), 7.39-7.30 (m, 3H), 6.95 (d,  $J = 8.6$  Hz, 2H), 3.83 (s, 3H), 3.37 (s, 3H), 2.77-2.56 (m, 2H), 2.08-1.98 (m, 2H), 1.15-1.07 (m, 1H), 0.98-0.90 (m, 1H), 0.58 (s, 3H);  $^{13}\text{C}$  NMR (100 MHz, Chloroform-*d*)  $\delta$  171.9, 162.6, 160.8, 143.6, 140.7, 140.4, 135.8, 130.0, 128.9, 127.6, 127.4, 127.1 (d,  $J = 2.5$  Hz), 126.9, 113.7, 55.1, 51.2, 37.0, 21.3, 11.3, -3.2; IR (KBr,  $\text{cm}^{-1}$ ): 2917.7, 1697.8, 1591.4, 1502.4, 1277.8, 1245.9, 1181.9, 1110.5, 761.9, 696.3; HRMS (ESI-TOF)  $m/z$ :  $[\text{M} + \text{Na}]^+$  calculated for  $\text{C}_{27}\text{H}_{28}\text{NaO}_3\text{Si}$ : 451.1700, found: 451.1688.

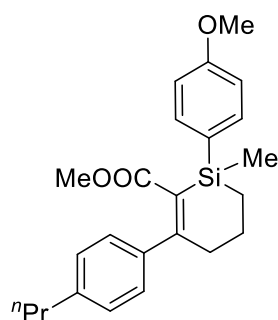

**Methyl 1-(4-methoxyphenyl)-1-methyl-3-(4-propylphenyl)-1,4,5,6-tetrahydro-silole-2-carboxylate (3aj):**

Yellow oil (50.5 mg, 64% yield).  $^1\text{H}$  NMR (400 MHz, Chloroform-*d*)  $\delta$  7.46 (d,  $J = 8.5$  Hz, 2H), 7.09-6.99 (m, 4H), 6.83 (d,  $J = 8.6$  Hz, 2H), 3.72 (s, 3H), 3.23 (s, 3H), 2.63-2.40 (m, 4H), 1.96-1.84 (m, 2H), 1.64-1.48 (m, 2H), 1.03-0.93 (m, 1H), 0.84 (t,  $J = 7.3$  Hz, 4H), 0.45 (s, 3H);  $^{13}\text{C}$  NMR (100 MHz, Chloroform-*d*)  $\delta$  172.0, 163.1, 160.7, 142.2, 141.9, 135.8, 129.4, 128.2, 127.8, 126.5, 113.7, 55.1, 51.0, 37.8, 36.9, 24.5, 21.3, 13.9, 11.3, -3.2; IR (KBr,  $\text{cm}^{-1}$ ): 2926.1, 1698.8, 1591.9, 1502.8, 1277.9, 1246.0, 1181.8, 1110.8, 798.2; HRMS (ESI-TOF)  $m/z$ :  $[\text{M} + \text{Na}]^+$  calculated for  $\text{C}_{24}\text{H}_{30}\text{NaO}_3\text{Si}$ : 417.1856, found: 417.1848.

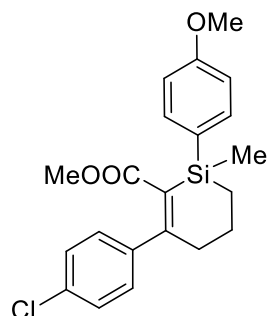

**Methyl 3-(4-chlorophenyl)-1-(4-methoxyphenyl)-1-methyl-1,4,5,6-tetrahydro-silole-2-carboxylate (3ak):**

Yellow oil (30.9 mg, 40% yield).  $^1\text{H}$  NMR (400 MHz, Chloroform-*d*)  $\delta$  7.45 (d,  $J = 9.0$  Hz, 2H), 7.19 (t,  $J = 5.4$  Hz, 2H), 7.06 (d,  $J = 6.5$  Hz, 2H), 6.84 (d,  $J = 8.6$  Hz, 2H), 3.74 (s, 3H), 3.26 (s, 3H), 2.58-2.36 (m, 2H), 1.97-1.85 (m, 2H), 1.05-0.92 (m, 1H), 0.87-0.74 (m, 1H), 0.46 (s, 3H);  $^{13}\text{C}$  NMR (100 MHz, Chloroform-*d*)  $\delta$  171.5, 161.8, 160.8, 143.0, 135.8, 133.5, 130.7, 128.4, 128.0, 127.4, 113.8, 55.1, 51.2, 37.0, 21.2, 11.2, -3.2; IR (KBr,  $\text{cm}^{-1}$ ): 2912.0, 1700.2, 1592.41, 1502.8, 1278.3, 1246.4, 1181.9,



1110.9, 798.4; HRMS (ESI-TOF)  $m/z$ :  $[M+ Na]^+$  calculated for  $C_{21}H_{23}ClNaO_3Si$ : 409.0997, found: 409.0987.

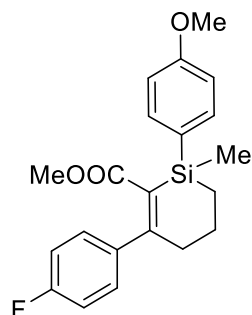

**Methyl 3-(4-fluorophenyl)-1-(4-methoxyphenyl)-1-methyl-1,4,5,6-tetrahydro-silole-2-carboxylate (3al):**

Colorless oil (28.16 mg, 38% yield).  $^1H$  NMR (400 MHz, Chloroform-*d*)  $\delta$  7.45 (d,  $J = 8.5$  Hz, 2H), 7.14-7.08 (m, 2H), 6.91 (t,  $J = 8.7$  Hz, 2H), 6.84 (d,  $J = 8.5$  Hz, 2H), 3.73 (s, 3H), 3.25 (s, 3H), 2.61-2.38 (m, 2H), 1.95-1.85 (m, 2H), 1.05-0.93 (m, 1H), 0.86-0.78 (m, 1H), 0.46 (s, 3H);  $^{13}C$  NMR (100 MHz, Chloroform-*d*)  $\delta$  171.7, 163.5, 161.9, 161.1, 160.8, 140.6 (d,  $J = 3.5$  Hz), 135.8, 130.4, 128.3 (d,  $J = 8.1$  Hz), 127.5, 115.2, 115.0, 113.7, 55.1, 51.2, 37.2, 21.3, 11.2, -3.2; IR (KBr,  $cm^{-1}$ ): 2911.9, 1699.5, 1593.3, 1503.6, 1278.2, 1246.3, 1182.2, 1110.8, 798.8; HRMS (ESI-TOF)  $m/z$ :  $[M+ Na]^+$  calculated for  $C_{21}H_{23}FNaO_3Si$ : 393.1293, found: 393.1279.

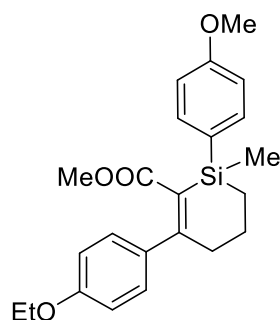

**Methyl 3-(4-ethoxyphenyl)-1-(4-methoxyphenyl)-1-methyl-1,4,5,6-tetrahydro-silole-2-carboxylate (3am):**

Colorless oil (28.6 mg, 36% yield).  $^1H$  NMR (400 MHz, Chloroform-*d*)  $\delta$  7.54 (d,  $J = 8.5$  Hz, 2H), 7.16 (d,  $J = 8.7$  Hz, 2H), 6.92 (d,  $J = 8.4$  Hz, 2H), 6.83 (d,  $J = 8.7$  Hz, 2H), 4.02 (q,  $J = 7.0$  Hz, 2H), 3.81 (s, 3H), 3.35 (s, 3H), 2.74-2.48 (m, 2H), 2.04-1.91 (m, 2H), 1.41 (t,  $J = 7.0$  Hz, 3H), 1.10-0.98 (m, 1H), 0.94-0.84 (m, 1H), 0.53 (s, 3H);  $^{13}C$  NMR (100 MHz, Chloroform-*d*)  $\delta$  172.2, 162.6, 160.7, 158.6, 136.8, 135.8, 129.1,

128.0, 127.8, 114.0, 113.7, 63.5, 55.1, 51.2, 36.9, 21.3, 15.0, 11.3, -3.2; IR (KBr,  $\text{cm}^{-1}$ ): 2924.1, 1697.3, 1592.2, 1503.8, 1242.0, 1179.7, 1110.6, 1044.5, 798.7; HRMS (ESI-TOF)  $m/z$ :  $[\text{M} + \text{Na}]^+$  calculated for  $\text{C}_{23}\text{H}_{28}\text{NaO}_4\text{Si}$ : 419.1649, found: 419.1654.

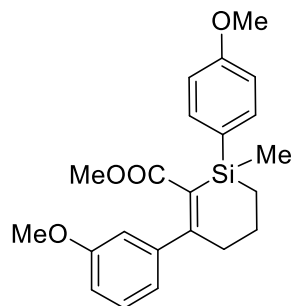

**Methyl 3-(3-methoxyphenyl)-1-(4-methoxyphenyl)-1-methyl-1,4,5,6-tetrahydro-silole-2-carboxylate (3an):**

Yellow oil (50 mg, 65% yield).  $^1\text{H}$  NMR (400 MHz, Chloroform-*d*)  $\delta$  7.46 (d,  $J = 8.7$  Hz, 2H), 7.17-7.08 (m, 1H), 6.83 (d,  $J = 8.6$  Hz, 2H), 6.75-6.66 (m, 3H), 3.70 (d,  $J = 6.2$  Hz, 6H), 3.24 (s, 3H), 2.61-2.39 (m, 2H), 1.94-1.83 (m, 2H), 1.02-0.93 (m, 1H), 0.85-0.76 (m, 1H), 0.45 (s, 3H);  $^{13}\text{C}$  NMR (100 MHz, Chloroform-*d*)  $\delta$  171.7, 162.5, 160.7, 159.4, 146.0, 135.8, 129.9, 129.2, 127.5, 119.0, 113.7, 113.3, 112.0, 55.3, 55.1, 51.1, 36.8, 21.2, 11.2, -3.2; IR (KBr,  $\text{cm}^{-1}$ ): 2910.1, 1699.1, 1591.4, 1502.9, 1278.0, 1245.4, 1181.6, 1110.8, 1033.2, 799.9; HRMS (ESI-TOF)  $m/z$ :  $[\text{M} + \text{Na}]^+$  calculated for  $\text{C}_{22}\text{H}_{26}\text{NaO}_4\text{Si}$ : 405.1493, found: 405.1498.

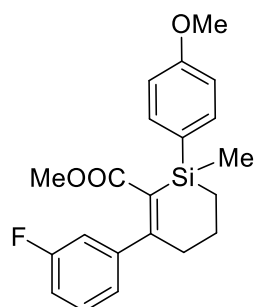

**Methyl 3-(3-fluorophenyl)-1-(4-methoxyphenyl)-1-methyl-1,4,5,6-tetrahydro-silole-2-carboxylate (3ao):**

Colorless oil (23.7 mg, 32% yield).  $^1\text{H}$  NMR (400 MHz, Chloroform-*d*)  $\delta$  7.46 (d,  $J = 8.5$  Hz, 2H), 7.24-7.14 (m, 1H), 6.94-6.78 (m, 5H), 3.74 (s, 3H), 3.26 (s, 3H), 2.62-2.38 (m, 2H), 1.95-1.86 (m, 2H), 1.04-0.93 (m, 1H), 0.88-0.76 (m, 1H), 0.46 (s, 3H);  $^{13}\text{C}$  NMR (100 MHz, Chloroform-*d*)  $\delta$  171.4, 163.9, 161.4 (d,  $J = 6.0$  Hz), 160.8, 146.8 (d,

$J = 7.3$  Hz), 135.8, 130.8, 129.7 (d,  $J = 8.4$  Hz), 127.3, 122.3 (d,  $J = 2.5$  Hz), 114.5 (d,  $J = 21.1$  Hz), 113.7 (d,  $J = 3.0$  Hz), 113.5, 55.1, 51.2, 36.9, 21.2, 11.2, -3.3; IR (KBr,  $\text{cm}^{-1}$ ): 2948.6, 1703.4, 1592.4, 1503.1, 1278.6, 1246.9, 1111.4, 801.1, 697.2; HRMS (ESI-TOF)  $m/z$ :  $[M+Na]^+$  calculated for  $\text{C}_{21}\text{H}_{23}\text{FNaO}_3\text{Si}$ : 393.1293, found: 393.1307.

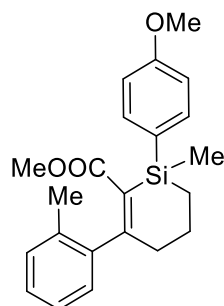

**Methyl 1-(4-methoxyphenyl)-1-methyl-3-(o-tolyl)-1,4,5,6-tetrahydrosililine-2-carboxylate (3ap):**

Yellow oil (33 mg, 45% yield).  $^1\text{H}$  NMR (400 MHz, Chloroform- $d$ )  $\delta$  7.49-7.42 (m, 2H), 7.11-7.03 (m, 3H), 6.95-6.83 (m, 3H), 3.74 (s, 3H), 3.20 (d,  $J = 5.4$  Hz, 3H), 2.43-2.25 (m, 2H), 2.18 (d,  $J = 24.0$  Hz, 3H), 1.95-1.80 (m, 2H), 1.02-0.94 (m, 1H), 0.89-0.77 (m, 1H), 0.47 (d,  $J = 7.8$  Hz, 3H);  $^{13}\text{C}$  NMR (100 MHz, Chloroform- $d$ )  $\delta$  170.3, 166.4 (d,  $J = 18.3$  Hz), 160.7, 144.7 (d,  $J = 13.8$  Hz), 135.7 (d,  $J = 6.6$  Hz), 133.4 (d,  $J = 60.0$  Hz), 129.8 (d,  $J = 10.3$  Hz), 129.0 (d,  $J = 24.0$  Hz), 128.1 (d,  $J = 21.1$  Hz), 127.0 (d,  $J = 5.0$  Hz), 126.2 (d,  $J = 60.0$  Hz), 125.5 (d,  $J = 10.4$  Hz), 113.7 (d,  $J = 3.7$  Hz), 55.1, 51.0, 37.8 (d,  $J = 21.8$  Hz), 21.2 (d,  $J = 11.9$  Hz), 19.5 (d,  $J = 27.5$  Hz), 11.8 (d,  $J = 20.4$  Hz), -3.0 (d,  $J = 8.8$  Hz); IR (KBr,  $\text{cm}^{-1}$ ): 2909.4, 1716.3, 1591.9, 1502.7, 1277.5, 1246.6, 1181.9, 1110.8, 799.7; HRMS (ESI-TOF)  $m/z$ :  $[M+Na]^+$  calculated for  $\text{C}_{22}\text{H}_{26}\text{NaO}_3\text{Si}$ : 389.1543, found: 389.1534.

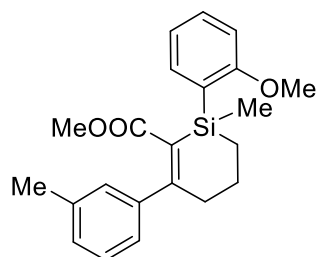

**Methyl 1-(2-methoxyphenyl)-1-methyl-3-(m-tolyl)-1,4,5,6-tetrahydrosililine-2-carboxylate (3aq):**

Yellow oil (22 mg, 30% yield).  $^1\text{H}$  NMR (400 MHz, Chloroform-*d*)  $\delta$  7.51-7.44 (m, 1H), 7.32-7.25 (m, 1H), 7.12 (t,  $J = 7.5$  Hz, 1H), 7.04-6.85 (m, 4H), 6.76 (d,  $J = 8.2$  Hz, 1H), 3.72 (s, 3H), 3.27 (s, 3H), 2.53-2.42 (m, 2H), 2.26 (s, 3H), 1.91-1.75 (m, 2H), 1.18-1.07 (m, 1H), 0.82-0.71 (m, 1H), 0.44 (s, 3H);  $^{13}\text{C}$  NMR (100 MHz, Chloroform-*d*)  $\delta$  172.2, 164.3, 162.8, 144.9, 137.7, 136.6, 131.2, 129.9, 128.3, 128.1, 127.2, 124.9, 123.8, 120.6, 109.6, 55.2, 51.1, 37.1, 21.6, 21.3, 10.8, -2.8; IR (KBr,  $\text{cm}^{-1}$ ): 2909.0, 1703.9, 1587.3, 1427.5, 1233.8, 1044.9, 802.6, 756.7; HRMS (ESI-TOF)  $m/z$ :  $[\text{M} + \text{Na}]^+$  calculated for  $\text{C}_{22}\text{H}_{26}\text{NaO}_3\text{Si}$ : 389.1543, found: 389.1563.

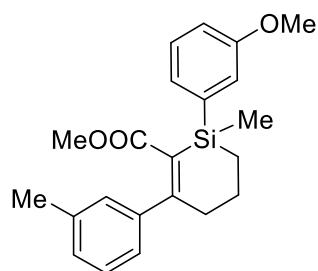

**Methyl 1-(3-methoxyphenyl)-1-methyl-3-(m-tolyl)-1,4,5,6-tetrahydrosilole-2-carboxylate (3ar):**

Yellow oil (41.1 mg, 56% yield).  $^1\text{H}$  NMR (400 MHz, Chloroform-*d*)  $\delta$  7.31 (t,  $J = 8.2$  Hz, 1H), 7.25-7.17 (m, 3H), 7.13-7.00 (m, 3H), 6.93 (dd,  $J = 8.2, 2.7$  Hz, 1H), 3.83 (s, 3H), 3.35 (s, 3H), 2.71-2.51 (m, 2H), 2.35 (s, 3H), 2.06-1.93 (m, 2H), 1.14-1.05 (m, 1H), 0.96-0.87 (m, 1H), 0.57 (s, 3H);  $^{13}\text{C}$  NMR (100 MHz, Chloroform-*d*)  $\delta$  171.7, 164.1, 159.0, 144.6, 138.7, 137.7, 129.1, 129.0, 128.5, 128.1, 127.1, 126.6, 123.7, 119.8, 114.6, 55.2, 51.1, 37.1, 21.6, 21.2, 11.1, -3.3; IR (KBr,  $\text{cm}^{-1}$ ): 2918.1, 1699.5, 1570.1, 1281.7, 1227.4, 1045.3, 782.1, 695.5; HRMS (ESI-TOF)  $m/z$ :  $[\text{M} + \text{Na}]^+$  calculated for  $\text{C}_{22}\text{H}_{26}\text{NaO}_3\text{Si}$ : 389.1543, found: 389.1561.

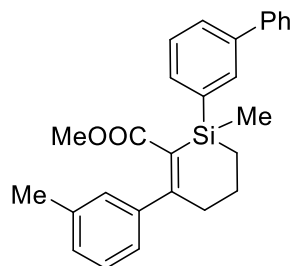

**Methyl 1-([1,1'-biphenyl]-3-yl)-1-methyl-3-(m-tolyl)-1,4,5,6-tetrahydrosilole-2-carboxylate (3as):**

Colorless oil (31.4 mg, 38% yield).  $^1\text{H}$  NMR (400 MHz, Chloroform-*d*)  $\delta$  7.74 (s, 1H), 7.56-7.48 (m, 4H), 7.37 (t,  $J = 8.1$  Hz, 3H), 7.27 (t,  $J = 10.7$  Hz, 1H), 7.12 (t,  $J = 7.5$  Hz, 1H), 7.04-6.92 (m, 3H), 3.27 (s, 3H), 2.64-2.42 (m, 2H), 2.26 (s, 3H), 1.97-1.87 (m, 2H), 1.10-1.02 (m, 1H), 0.91-0.83 (m, 1H), 0.52 (s, 3H);  $^{13}\text{C}$  NMR (100 MHz, Chloroform-*d*)  $\delta$  171.8, 164.1, 144.6, 141.7, 140.6, 137.8, 137.7, 133.3, 133.1, 129.1, 128.9, 128.5, 128.3, 128.1, 127.4, 127.3, 127.1, 123.7, 51.2, 37.1, 21.6, 21.3, 11.1, -3.2; IR (KBr,  $\text{cm}^{-1}$ ): 2919.6, 1699.2, 1428.6, 1228.9, 1046.6, 799.5, 699.6, 646.4; HRMS (ESI-TOF)  $m/z$ :  $[\text{M} + \text{Na}]^+$  calculated for  $\text{C}_{27}\text{H}_{28}\text{NaO}_2\text{Si}$ : 435.1751, found: 435.1737.

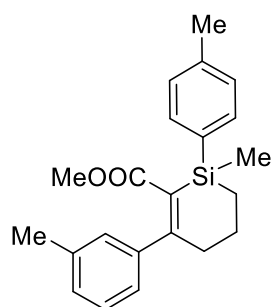

**Methyl 1-methyl-3-(m-tolyl)-1-(p-tolyl)-1,4,5,6-tetrahydrosilole-2-carboxylate (3at):**

Colorless oil (36.5 mg, 52% yield).  $^1\text{H}$  NMR (400 MHz, Chloroform-*d*)  $\delta$  7.54 (d,  $J = 7.9$  Hz, 2H), 7.25-7.18 (m, 3H), 7.12-7.01 (m, 3H), 3.35 (s, 3H), 2.70-2.52 (m, 2H), 2.36 (d,  $J = 5.5$  Hz, 6H), 2.08-1.93 (m, 2H), 1.15-1.02 (m, 1H), 0.96-0.88 (m, 1H), 0.56 (s, 3H);  $^{13}\text{C}$  NMR (100 MHz, Chloroform-*d*)  $\delta$  171.8, 163.7, 144.7, 139.3, 137.7, 134.3, 133.3, 129.4, 128.8, 128.4, 128.1, 127.1, 123.7, 51.1, 37.1, 21.6, 21.5, 21.3, 11.2, -3.3; IR (KBr,  $\text{cm}^{-1}$ ): 2919.1, 1700.6, 1578.8, 1429.8, 1229.1, 1106.5, 786.5, 703.9; HRMS (ESI-TOF)  $m/z$ :  $[\text{M} + \text{Na}]^+$  calculated for  $\text{C}_{22}\text{H}_{26}\text{NaO}_2\text{Si}$ : 373.1594, found: 373.1607.

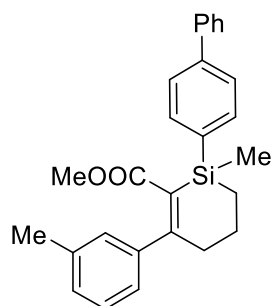

**Methyl 1-([1,1'-biphenyl]-4-yl)-1-methyl-3-(m-tolyl)-1,4,5,6-tetrahydrosilole-2-carboxylate (3au):**

Light yellow oil (43 mg, 52% yield).  $^1\text{H}$  NMR (400 MHz, Chloroform-*d*)  $\delta$  7.61 (d,  $J$  = 8.2 Hz, 2H), 7.52 (d,  $J$  = 9.8 Hz, 4H), 7.35 (t,  $J$  = 7.6 Hz, 2H), 7.27 (t,  $J$  = 7.4 Hz, 1H), 7.12 (t,  $J$  = 8.0 Hz, 1H), 7.03-6.91 (m, 3H), 3.26 (s, 3H), 2.64-2.46 (m, 2H), 2.26 (s, 3H), 1.98-1.87 (m, 2H), 1.10-0.98 (m, 1H), 0.90-0.81 (m, 1H), 0.51 (s, 3H);  $^{13}\text{C}$  NMR (100 MHz, Chloroform-*d*)  $\delta$  171.8, 164.1, 144.6, 142.1, 141.2, 137.8, 135.8, 134.8, 129.1, 128.9, 128.5, 128.1, 127.5, 127.3, 127.1, 126.7, 123.7, 51.1, 37.1, 21.6, 21.3, 11.2, -3.3; IR (KBr,  $\text{cm}^{-1}$ ): 2919.2, 1698.9, 1203.1, 1112.9, 798.3, 755.1, 697.2; HRMS (ESI-TOF)  $m/z$ :  $[\text{M} + \text{Na}]^+$  calculated for  $\text{C}_{27}\text{H}_{28}\text{NaO}_2\text{Si}$ : 435.1751, found: 435.1774.

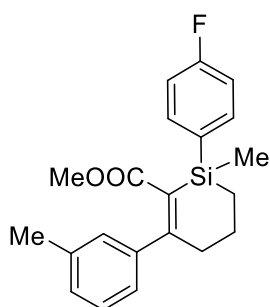

**Methyl 1-(4-fluorophenyl)-1-methyl-3-(m-tolyl)-1,4,5,6-tetrahydrosilole-2-carboxylate (3av):**

Yellow oil (41.8 mg, 59% yield).  $^1\text{H}$  NMR (400 MHz, Chloroform-*d*)  $\delta$  7.60 (dd,  $J$  = 2.1 Hz, 2H), 7.20 (t,  $J$  = 7.5 Hz, 1H), 7.13-6.97 (m, 5H), 3.32 (s, 3H), 2.70-2.49 (m, 2H), 2.35 (s, 3H), 2.04-1.89 (m, 2H), 1.16-0.99 (m, 1H), 0.99-0.87 (m, 1H), 0.56 (s, 3H);  $^{13}\text{C}$  NMR (100 MHz, Chloroform-*d*)  $\delta$  171.7, 165.2, 164.2, 162.8, 144.5, 137.8, 136.3 (d,  $J$  = 7.8 Hz), 132.5 (d,  $J$  = 3.7 Hz), 129.0, 128.6, 128.1, 127.1, 123.6, 115.2, 115.0, 51.1, 37.1, 21.6, 21.2, 11.2, -3.3; IR (KBr,  $\text{cm}^{-1}$ ): 2919.9, 1699.3, 1586.2 1498.9, 1228.9, 1163.0, 1114.1, 824.5, 798.4, 703.5; HRMS (ESI-TOF)  $m/z$ :  $[\text{M} + \text{Na}]^+$  calculated for  $\text{C}_{21}\text{H}_{23}\text{FNaO}_2\text{Si}$ : 377.1344, found: 377.1331.

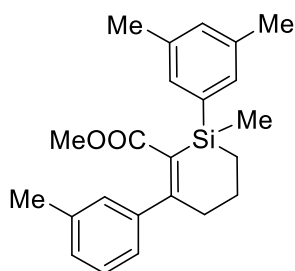

**Methyl 1-(3,5-dimethylphenyl)-1-methyl-3-(m-tolyl)-1,4,5,6-tetrahydrosilole-2-carboxylate (3aw):**

Yellow oil (29.2 mg, 40% yield).  $^1\text{H}$  NMR (400 MHz, Chloroform-*d*)  $\delta$  7.15-7.08 (m, 3H), 7.03-6.91 (m, 4H), 3.26 (s, 3H), 2.64-2.54 (m, 1H), 2.50-2.40 (m, 1H), 2.25 (d,  $J$  = 5.9 Hz, 9H), 1.96-1.86 (m, 2H), 1.05-0.97 (m, 1H), 0.84-0.77 (m, 1H), 0.46 (s, 3H);  $^{13}\text{C}$  NMR (100 MHz, Chloroform-*d*)  $\delta$  171.8, 163.6, 144.7, 137.7, 137.1, 136.7, 132.0, 131.2, 129.5, 128.5, 128.1, 127.1, 123.7, 51.1, 37.1, 21.6, 21.3, 11.2, -3.1; IR (KBr,  $\text{cm}^{-1}$ ): 2916.9, 1701.3, 1428.9, 1229.0, 1139.3, 856.5, 784.2, 694.9; HRMS (ESI-TOF)  $m/z$ :  $[\text{M} + \text{Na}]^+$  calculated for  $\text{C}_{23}\text{H}_{28}\text{NaO}_2\text{Si}$ : 387.1751, found: 387.1735.

**Table S1. The effect of Rhodium metal salts in this reaction.<sup>a</sup>**

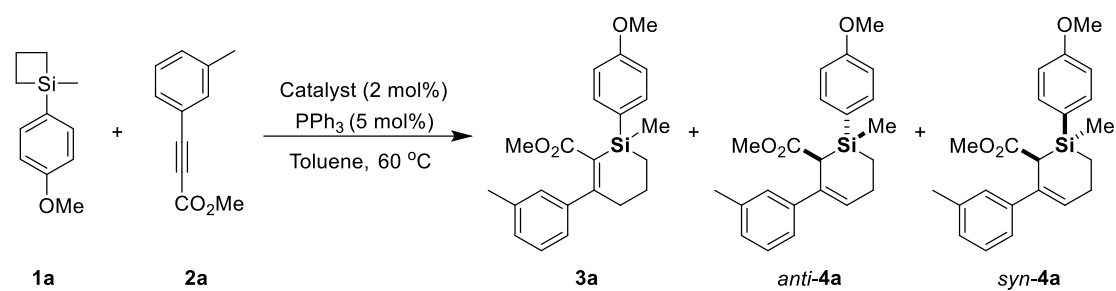

| Entry | Catalyst                                                          | Con.(%) <sup>b</sup> | 3a:4a (%) <sup>b</sup> | dr of 4a (%) <sup>b</sup> |
|-------|-------------------------------------------------------------------|----------------------|------------------------|---------------------------|
| 1     | [Rh(nbd) <sub>2</sub> Cl] <sub>2</sub>                            | nr                   | /                      |                           |
| 2     | [Rh(OAc) <sub>2</sub> ]                                           | nr                   | /                      |                           |
| 3     | Rh(CO) <sub>4</sub> Cl <sub>2</sub>                               | nr                   | /                      |                           |
| 4     | Rh(acac)(CO) <sub>2</sub>                                         | nr                   | /                      |                           |
| 5     | [Rh(cod) <sub>2</sub> Cl] <sub>2</sub>                            | nr                   | /                      |                           |
| 6     | [Rh(C <sub>2</sub> H <sub>4</sub> ) <sub>2</sub> Cl] <sub>2</sub> | 15                   | 7:93                   | 32:68                     |
| 7     | [Rh(cod) <sub>2</sub> ] <sub>2</sub> BF <sub>4</sub>              | nr                   | /                      |                           |
| 8     | Rh(PPh <sub>3</sub> ) <sub>3</sub> Cl                             | nr                   | /                      |                           |
| 9     | RhCl <sub>3</sub>                                                 | nr                   | /                      |                           |

<sup>a</sup>All the reactions were run on a 0.2 mmol scale in 2.0 mL solvents for 14 h. <sup>b</sup>Determined by GC-MS.



**Table S2. The effect of P-ligands in this reaction.<sup>a</sup>**

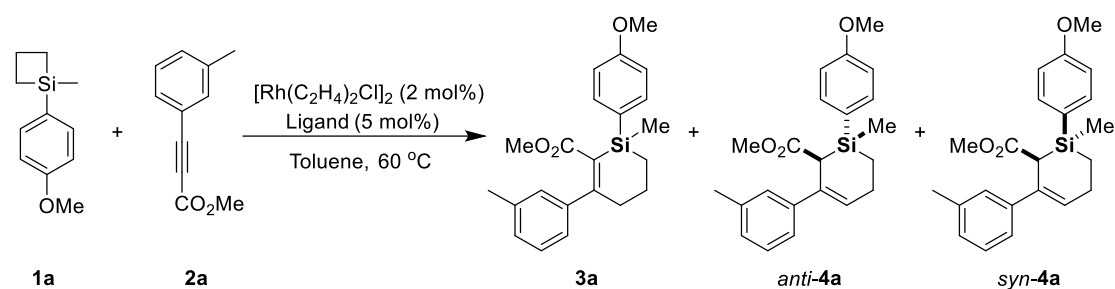

| Entry     | Ligand     | Con.(%) <sup>b</sup> | <b>3a:4a</b> (%) <sup>b</sup> | <i>dr</i> of <b>4a</b> (%) <sup>b</sup> |
|-----------|------------|----------------------|-------------------------------|-----------------------------------------|
| 1         | DPEphos    | 15                   | 28:72                         | 17:83                                   |
| 2         | JohnPhos   | trace                | /                             | /                                       |
| 3         | Xantphos   | nr                   | /                             | /                                       |
| 4         | DavePhos   | nr                   | /                             | /                                       |
| 5         | S-Phos     | nr                   | /                             | /                                       |
| 6         | RuPhos     | nr                   | /                             | /                                       |
| 7         | CyJohnPhos | nr                   | /                             | /                                       |
| 8         | Xphos      | nr                   | /                             | /                                       |
| 9         | Brettphos  | nr                   | /                             | /                                       |
| 10        | <b>P1</b>  | 76                   | 31:69                         | 74:26                                   |
| 11        | <b>P2</b>  | 36                   | 11:89                         | 56:44                                   |
| 12        | <b>P3</b>  | 19                   | 12:87                         | 59:41                                   |
| <b>13</b> | <b>P4</b>  | <b>30</b>            | <b>90:10</b>                  | <b>13:87</b>                            |
| 14        | <b>P5</b>  | 25                   | 24:76                         | 61:39                                   |
| 15        | <b>P6</b>  | nr                   | /                             | /                                       |
| 16        | <b>P7</b>  | nr                   | /                             | /                                       |
| 17        | <b>P8</b>  | nr                   | /                             | /                                       |
| 18        | <b>P9</b>  | nr                   | /                             | /                                       |
| 19        | <b>P10</b> | nr                   | /                             | /                                       |
| 20        | <b>P11</b> | nr                   | /                             | /                                       |
| 21        | <b>P12</b> | nr                   | /                             | /                                       |

<sup>a</sup>All the reactions were run on a 0.2 mmol scale in 2.0 mL solvents for 14 h. <sup>b</sup>Determined by GC-MS.

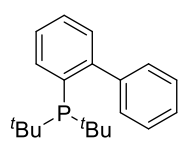

JohnPhos

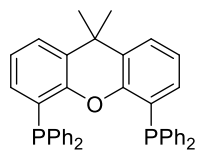

XantPhos

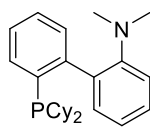

DavePhos

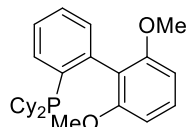

S-Phos

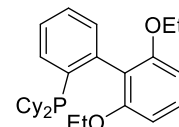

RuPhos

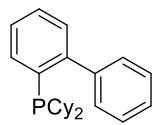

CyJohnPhos

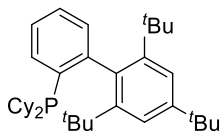

Xphos

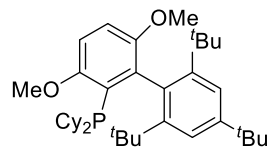

Brettphos

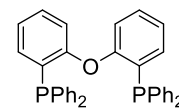

DPEphos

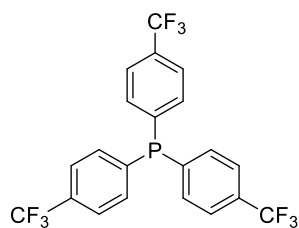

P1

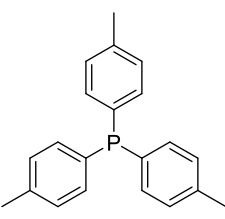

P2

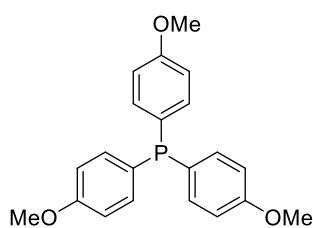

P3

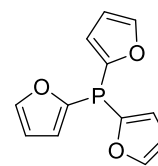

P4

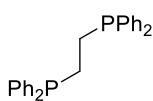

P5

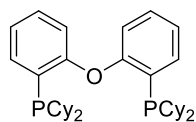

P6

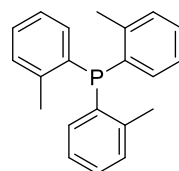

P7

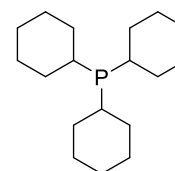

P8

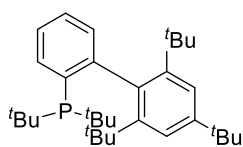

P9

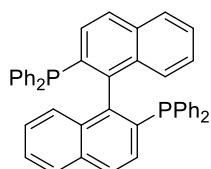

P10

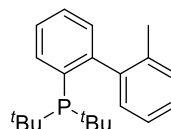

P11

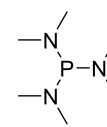

P12

**Table S3. The effect of Additive and Temperature in this reaction.<sup>a</sup>**

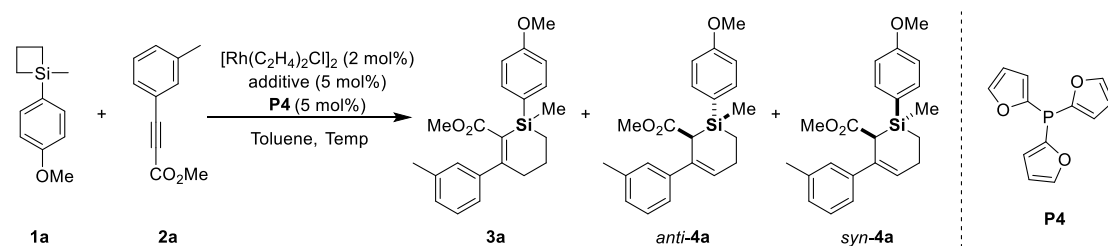

| Entry | additive                                            | Temp (°C) | Con.(%) <sup>b</sup> | 3a:4a (%) <sup>b</sup> | dr of 4a (%) <sup>b</sup> | 3a (%) <sup>c</sup> |
|-------|-----------------------------------------------------|-----------|----------------------|------------------------|---------------------------|---------------------|
| 1     | Cu(CH <sub>3</sub> CN) <sub>4</sub> PF <sub>6</sub> | 60        | nr                   | /                      | /                         | /                   |
| 2     | Cu(CH <sub>3</sub> CN) <sub>4</sub> BF <sub>4</sub> | 60        | 35                   | 90:10                  | 20:80                     | /                   |
| 3     | CuF <sub>2</sub>                                    | 60        | 18                   | 94:6                   | 17:83                     | /                   |
| 4     | Cu(OTf) <sub>2</sub>                                | 60        | nr                   | /                      | /                         | /                   |
| 5     | CuI                                                 | 60        | 46                   | 55:45                  | 38:62                     | /                   |
| 6     | Cu(acac) <sub>2</sub>                               | 60        | 23                   | 94:6                   | 13:87                     | /                   |
| 7     | Cu(OAc) <sub>2</sub>                                | 60        | 18                   | 92:8                   | 14:86                     | /                   |
| 8     | CuCl <sub>2</sub>                                   | 60        | 43                   | 89:11                  | 9:91                      | 19                  |
| 9     | Cu <sub>2</sub> SO <sub>4</sub>                     | 60        | 12                   | 95:5                   | 17:83                     | /                   |
| 10    | CuBr <sub>2</sub>                                   | 60        | 48                   | 41:59                  | 55:45                     | /                   |
| 11    | <b>CuCl<sub>2</sub></b>                             | <b>70</b> | <b>54</b>            | <b>88:12</b>           | <b>10:90</b>              | <b>21</b>           |
| 12    | CuCl <sub>2</sub>                                   | 80        | 58                   | 76:24                  | 8:92                      | 18                  |
| 13    | <b>CuCl</b>                                         | <b>70</b> | <b>65</b>            | <b>80:20</b>           | <b>28:72</b>              | <b>28</b>           |
| 14    | CuCN                                                | 70        | 67                   | 65:35                  | 14:86                     | 15                  |
| 15    | CuBr                                                | 70        | 10                   | 64:36                  | 26:74                     | 6                   |
| 16    | LiBF <sub>4</sub>                                   | 70        | 21                   | 94:6                   | 21:79                     | 10                  |
| 17    | ZnCl <sub>2</sub>                                   | 70        | 39                   | 82:18                  | 23:77                     | 16                  |
| 18    | NaSbF <sub>6</sub>                                  | 70        | nr                   | /                      | /                         | /                   |
| 19    | NaBH <sub>4</sub>                                   | 70        | nr                   | /                      | /                         | /                   |
| 20    | <sup>t</sup> BuONa                                  | 70        | nr                   | /                      | /                         | /                   |
| 21    | Et <sub>3</sub> NaBH                                | 70        | nr                   | /                      | /                         | /                   |
| 22    | <sup>i</sup> Pr <sub>2</sub> NH                     | 70        | nr                   | /                      | /                         | /                   |
| 23    | <sup>t</sup> BuOK                                   | 70        | nr                   | /                      | /                         | /                   |
| 24    | AgSbF <sub>6</sub>                                  | 70        | nr                   | /                      | /                         | /                   |
| 25    | AgBF <sub>4</sub>                                   | 70        | nr                   | /                      | /                         | /                   |

<sup>a</sup>All the reactions were run on a 0.2 mmol scale in 2.0 mL solvents for 14 h. <sup>b</sup>Determined by GC-MS. <sup>c</sup>Determined by <sup>1</sup>H NMR. <sup>c</sup>Yield of the isolated product.

**Table S4. The effect of the amount of 2a/catalyst/L8/additive in this reaction.<sup>a</sup>**

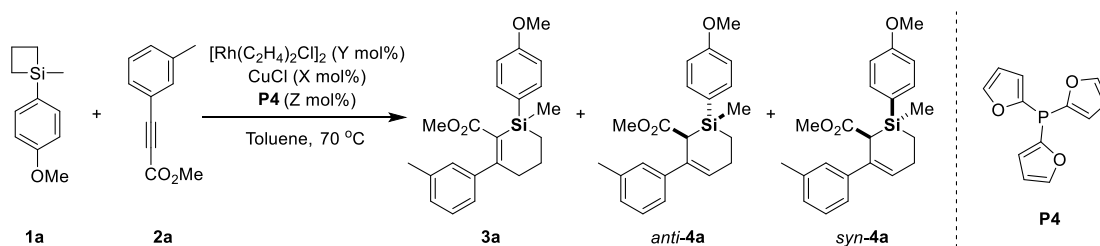

| Entry | 2a     | X  | Y | Z    | Con.(%) <sup>b</sup> | 3a:4a (%) <sup>b</sup> | dr of 4a (%) <sup>b</sup> | 3a (%) <sup>c</sup> | 3a (%) <sup>d</sup> |
|-------|--------|----|---|------|----------------------|------------------------|---------------------------|---------------------|---------------------|
| 1     | 1.2 eq | 5  | 2 | 5    | 65                   | 80:20                  | 28:72                     | 28                  | 25                  |
| 2     | 2.5 eq | 5  | 2 | 5    | 67                   | 85:15                  | 19:81                     | 42                  | 40                  |
| 3     | 2.5 eq | 10 | 2 | 5    | 85                   | 82:18                  | 22:78                     | 52                  | 48                  |
| 4     | 2.5 eq | 10 | 4 | 5    | 95                   | 83:17                  | 17:83                     | 62                  | 58                  |
| 5     | 2.5 eq | 10 | 4 | 12.5 | 96                   | 93:7                   | 22:78                     | 70                  | 65                  |

<sup>a</sup>All the reactions were run on a 0.2 mmol scale in 2.0 mL solvents for 14 h. <sup>b</sup>Determined by GC-MS. <sup>c</sup>Determined by <sup>1</sup>H NMR. <sup>d</sup>Determined by <sup>1</sup>H NMR. <sup>d</sup>Yield of the isolated product.

**Table S5. The effect of solvent in this reaction.<sup>a</sup>**

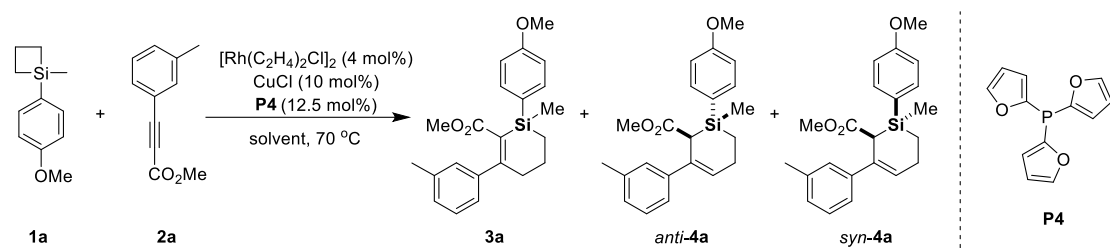

| Entry | Solvent            | Con.(%) <sup>b</sup> | 3a:4a(%) <sup>b</sup> | dr of 4a (%) <sup>b</sup> | 3a (%) <sup>c</sup> | 3a (%) <sup>d</sup> |
|-------|--------------------|----------------------|-----------------------|---------------------------|---------------------|---------------------|
| 1     | Tol                | 96                   | 93:7                  | 22:78                     | 70                  | 65                  |
| 2     | PhCl               | 92                   | 89:11                 | 17:83                     | 63                  | 51                  |
| 4     | EA                 | 80                   | 92:8                  | 17:83                     | /                   | /                   |
| 5     | 1,4-Dioxane        | 80                   | 81:19                 | 10:90                     | /                   | /                   |
| 6     | CH <sub>3</sub> CN | 49                   | 52:48                 | 30:70                     | /                   | /                   |
| 7     | <i>p</i> -xylene   | 74                   | 75:25                 | 29:71                     | /                   | /                   |
| 8     | Benzotrifluoride   | 35                   | 95:5                  | 27:73                     | /                   | /                   |

<sup>a</sup>All the reactions were run on a 0.2 mmol scale in 2.0 mL solvents for 14 h. <sup>b</sup>Determined by GC-MS. <sup>c</sup>Determined by <sup>1</sup>H NMR. <sup>d</sup>Yield of the isolated product.

**Table S6. Control Experiments.<sup>a</sup>**

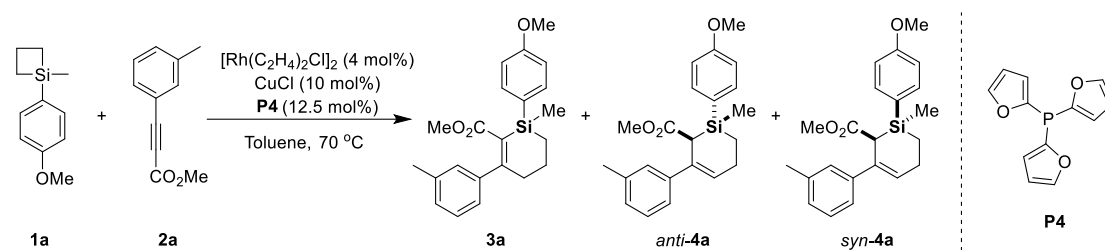

| Entry | Without                                          | Con.(%) <sup>b</sup> | <b>3a:4a</b> (%) <sup>b</sup> | <i>dr</i> of <b>4a</b> (%) <sup>b</sup> |
|-------|--------------------------------------------------|----------------------|-------------------------------|-----------------------------------------|
| 1     | <b>CuCl</b> and <b>P4</b>                        | nr                   | /                             | /                                       |
| 2     | $[\text{Rh}(\text{C}_2\text{H}_4)_2\text{Cl}]_2$ | < 5%                 | /                             | /                                       |
| 3     | <b>CuCl</b>                                      | 30                   | 90:10                         | 13:87                                   |

<sup>a</sup>All the reactions were run on a 0.2 mmol scale in 2.0 mL solvents for 14 h. <sup>b</sup>Determined by GC-MS.

### 3.2. General procedure for the synthesis of Ar-BINMOL-Phos.<sup>5</sup>

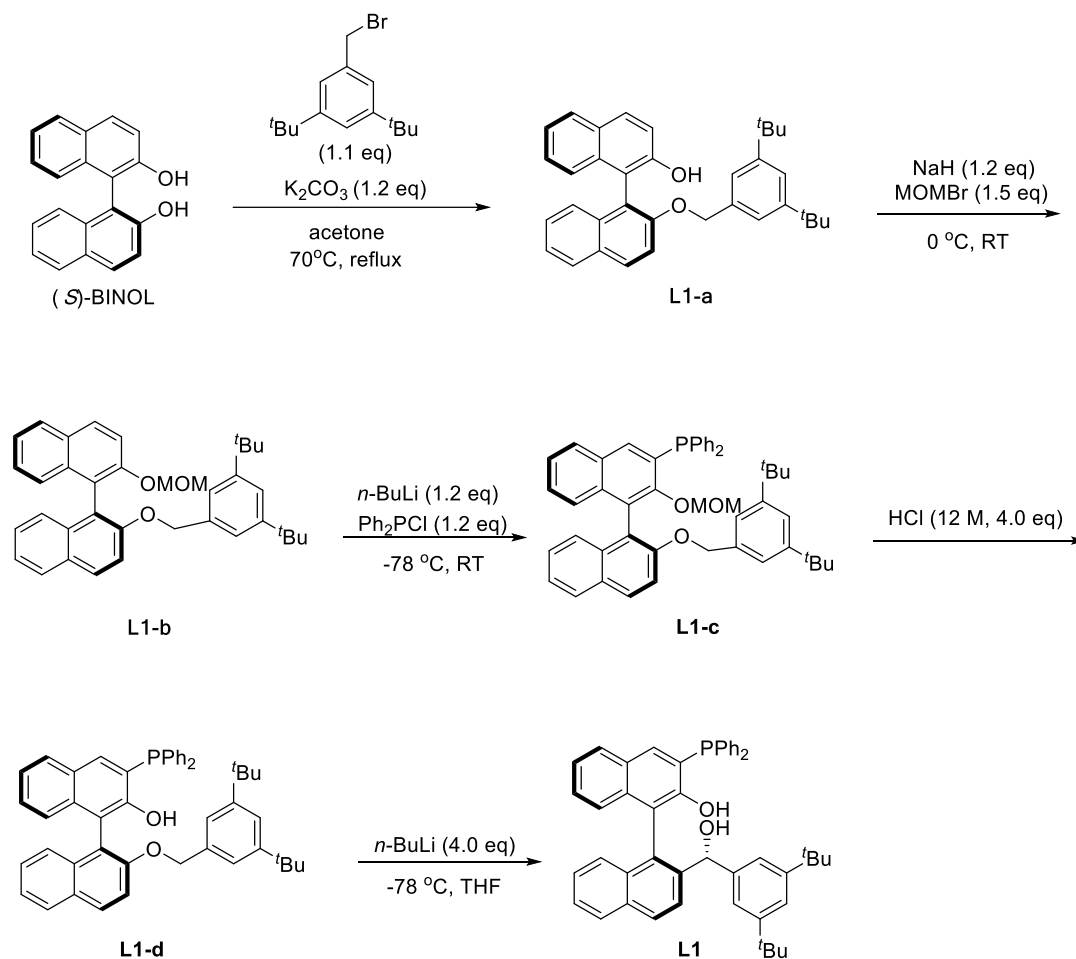

a) (S)-BINOL (30 mmol, 8.6 g) and K<sub>2</sub>CO<sub>3</sub> (1.2 eq, 5g) in acetone solution was heated to reflux and stir for 1 hour. Then 3,5-*t*Bu-PhCH<sub>2</sub>Br (1.1 eq, 8.3 ml) was added to the reaction mixture, and the reaction was stirred at 70 °C for 2 h. After the completion of the reaction was detected by TLC, the reaction flask was removed and cooled to room temperature, and the reactants were suction filtered. Wash with EtOAc. Take the lower layer of filtrate and spin dry under reduced pressure to obtain a concentrated organic phase, which is separated by chromatographic column (PE/EA, 50/1) to obtain **L1-a** (71% yield, 10.40 g)

b) Dry THF (20 mL) was added to the NaH (1.5 eq, 0.77g) in a round-bottom flask equipped with a stir bar. The solution was cooled to 0 °C, slowly drop the **L1-a** solution into the flask, continue to stir at 0 °C for 1 hour, then extract MOMBr (1.5 eq, 0.90 ml) and slowly drop it into the reaction system, and then add the reaction system Transfer

to room temperature and stir overnight. After the completion of the reaction was detected by TLC, the reaction was quenched with saturated aqueous  $\text{NH}_4\text{Cl}$  at low temperature. After stirring for 5 min, it was extracted with EtOAc. The organic phases were combined and spin-dried under reduced pressure to obtain a concentrated organic phase. Column separation (PE/EA, 50/1) to obtain **L1-b** (67% yield, 7.60 g )

c) 6.85 mL (17.1 mmol) of 2.5M solution n-BuLi in hexanes was added dropwise to a solution of compound **L1-b** (7.6 g, 14.3 mmol) in 30 mL of THF at  $-78\text{ }^\circ\text{C}$ . The resulting solution was stirred at  $-78\text{ }^\circ\text{C}$  for 1 h, and then 5 mL of  $\text{PPh}_2\text{Cl}$  (3.08 mL, 17.16 mmol, 1.2 equiv) in THF was added slowly at the same temperature. The reaction mixture was stirred for 6 hours. When the reaction is completed, it was quenched with saturated aqueous  $\text{NH}_4\text{Cl}$  (5 mL) and stirred vigorously for 5 minutes. The aqueous phase was extracted with ethyl acetate ( $3\times 20\text{ mL}$ ). The combined organic layers were dried over  $\text{Na}_2\text{SO}_4$  and concentrated under reduced pressure. The residue was purified by silica gel column chromatography (PE/EA, 10/1 ) to give 3.07 g (30% yield, 4.29 mmol) of the compound **L1-c**.

d) To a solution of **L1-c** (3.07 g, 4.29 mmol) in 10 mL of THF, 2 mL of 12M aqueous HCl was added at  $40\text{ }^\circ\text{C}$  for 2 h. The organic phase was extracted with water ( $3\times 30\text{ mL}$ ) and ethyl acetate ( $3\times 30\text{ mL}$ ). The combined organic layers were dried over  $\text{Na}_2\text{SO}_4$  and concentrated under reduced pressure. the residue was purified by silica gel column chromatography (PE/EA, 10/1 to 5/1) to give 2.59 g (90% yield) of compound **L1-d**.

e) To a solution of **L1-d** (2.59 g, 3.86 mmol) in 10 mL of THF, 6.18 mL (15.44 mmol, 4 equiv) of 2.5M solution n-BuLi in hexanes was added at  $-78\text{ }^\circ\text{C}$  for 5 min and the color of the mixture turn to jasper. Then the reaction continued to stir at room temperature for additional 2 h. At last, it was quenched with saturated aqueous  $\text{NH}_4\text{Cl}$  (10 mL) and stirred for 5 minutes. The aqueous phase was extracted with ethyl acetate ( $3\times 20\text{ mL}$ ). The combined organic layers were dried over  $\text{Na}_2\text{SO}_4$  and concentrated under reduced pressure. The residue was purified by silica gel column chromatography (PE/EA, 10/1 to 5/1) to give 1.82 g (2.7 mmol, 70% yield ) of **L1**. The synthesis of **L8/L9** are similarly to that of **L1**.



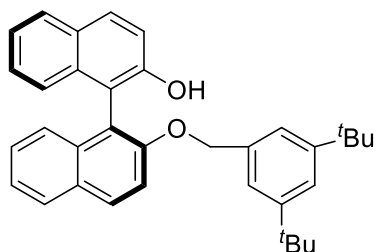

**(S)-2'-((3,5-di-tert-butylbenzyl)oxy)-[1,1'-binaphthalen]-2-ol (L1-a):**

White Solid, mp 67 – 77 °C;  $^1\text{H}$  NMR (400 MHz, Chloroform-*d*)  $\delta$  7.95 (d,  $J = 9.0$  Hz, 1H), 7.86-7.73 (m, 3H), 7.47 (d,  $J = 9.1$  Hz, 1H), 7.31-7.26 (m, 2H), 7.25-7.16 (m, 2H), 7.18-7.10 (m, 3H), 7.04 (d,  $J = 7.9$  Hz, 1H), 6.81 (d,  $J = 1.8$  Hz, 2H), 5.06-4.95 (m, 2H), 1.09 (s, 18H);  $^{13}\text{C}$  NMR (100 MHz, Chloroform-*d*)  $\delta$  155.4, 151.4, 150.9, 135.9, 134.2, 134.0, 131.1, 129.9, 129.8, 129.3, 128.3, 128.2, 127.4, 126.6, 125.2, 125.0, 124.5, 123.4, 121.6, 121.2, 117.7, 116.5, 115.7, 115.3, 71.7, 34.8, 31.5; HRMS (ESI-TOF)  $m/z$ :  $[\text{M} + \text{Na}]^+$  calculated for  $\text{C}_{35}\text{H}_{36}\text{NaO}_2$ : 511.2608, found: 511.2587.

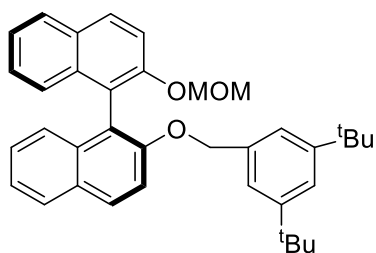

**(S)-2'-((3,5-di-tert-butylbenzyl)oxy)-2'-(methoxymethoxy)-1,1'-binaphthalene (L1-b):**

White Solid, mp 92 – 95 °C;  $^1\text{H}$  NMR (400 MHz, Chloroform-*d*)  $\delta$  7.86 (t,  $J = 9.1$  Hz, 2H), 7.77 (dd,  $J = 8.2, 3.7$  Hz, 2H), 7.50 (d,  $J = 9.0$  Hz, 1H), 7.42 (d,  $J = 9.0$  Hz, 1H), 7.27-7.18 (m, 2H), 7.14-7.10 (m, 5H), 6.72 (d,  $J = 1.8$  Hz, 2H), 4.99-4.83 (m, 4H), 3.01 (s, 3H), 1.06 (s, 18H);  $^{13}\text{C}$  NMR (100 MHz, Chloroform-*d*)  $\delta$  154.4, 152.8, 150.7, 136.5, 134.3, 134.2, 130.1, 129.5, 129.5, 128.1, 128.0, 126.5, 126.4, 125.7, 125.6, 124.2, 123.8, 121.5, 121.3, 121.1, 120.7, 117.5, 116.0, 95.3, 71.9, 55.9, 34.8, 31.5; HRMS (ESI-TOF)  $m/z$ :  $[\text{M} + \text{Na}]^+$  calculated for  $\text{C}_{37}\text{H}_{40}\text{NaO}_3$ : 555.2870, found: 555.2852.

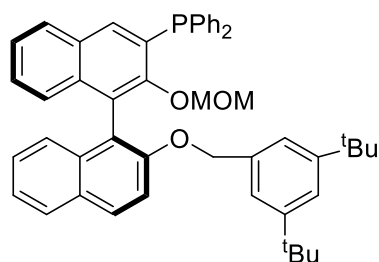

**(S)-2'-((3,5-di-tert-butylbenzyl)oxy)-2-(methoxymethoxy)-[1,1'-binaphthalen]-3-yl)diphenylphosphane (L1-c):**

White Solid, mp 113-116 °C;  $^1\text{H}$  NMR (400 MHz, Chloroform-*d*)  $\delta$  7.84 (d,  $J = 9.0$  Hz, 1H), 7.72 (d,  $J = 8.0, 1.2$  Hz, 1H), 7.51 (d,  $J = 7.9$  Hz, 1H), 7.37 (d,  $J = 9.0$  Hz, 1H), 7.28 (d,  $J = 3.8$  Hz, 5H), 7.21-7.06 (m, 11H), 6.84 (t,  $J = 7.7$  Hz, 2H), 6.73 (d,  $J = 1.8$  Hz, 2H), 5.01 (q,  $J = 11.9$  Hz, 2H), 4.62 (d,  $J = 5.4$  Hz, 1H), 4.51 (d,  $J = 5.5$  Hz, 1H), 2.60 (s, 3H), 1.03 (s, 18H);  $^{13}\text{C}$  NMR (100 MHz, Chloroform-*d*)  $\delta$  155.2, 155.0, 154.7, 150.7, 137.2, 137.1, 136.8, 136.7, 136.4, 134.7, 134.7, 134.5, 134.4, 134.2, 134.0, 133.9, 132.8, 132.7, 131.1, 129.9, 129.2, 129.0, 128.6, 128.6, 128.5, 128.4, 128.3, 127.9, 126.8, 126.7, 125.8, 125.7, 125.1-124.8 (m), 123.8, 121.5, 121.0, 120.0, 114.8, 99.0 (d,  $J = 6.3$  Hz), 71.5, 56.8 (d,  $J = 5.0$  Hz), 34.8, 31.5; HRMS (ESI-TOF)  $m/z$ :  $[\text{M} + \text{H}]^+$  calculated for  $\text{C}_{49}\text{H}_{50}\text{O}_3\text{P}$ : 717.3492, found: 717.3461.

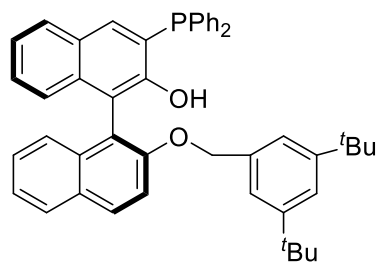

**(S)-2'-((3,5-di-tert-butylbenzyl)oxy)-3-(diphenylphosphanyl)-[1,1'-binaphthalen]-2-ol (L1-d):**

White Solid, mp 127 – 133 °C;  $^1\text{H}$  NMR (400 MHz, Chloroform-*d*)  $\delta$  8.11 (d,  $J = 9.0$  Hz, 1H), 7.98 (d,  $J = 8.0$  Hz, 1H), 7.79-7.72 (m, 1H), 7.62 (d,  $J = 9.1$  Hz, 1H), 7.59-7.51 (m, 2H), 7.52-7.27 (m, 14H), 7.08 (t,  $J = 6.8$  Hz, 2H), 6.98 (d,  $J = 2.0$  Hz, 2H), 5.21 (s, 2H), 1.28 (s, 18H);  $^{13}\text{C}$  NMR (100 MHz, Chloroform-*d*)  $\delta$  155.3, 152.4, 152.3, 150.8, 136.3, 136.2, 136.2, 136.1, 134.6, 134.5, 134.4, 134.1, 133.9, 133.7, 131.1, 129.7, 129.3, 129.3, 129.1, 128.7, 128.6 (d,  $J = 2.1$  Hz), 128.5, 128.4, 128.4, 128.3, 127.4,

127.1, 126.4, 126.3, 125.0, 124.8, 124.4, 123.5, 121.6, 121.0, 116.3, 115.5, 115.3 (d,  $J = 2.0$  Hz), 71.7, 34.8, 31.5; HRMS (ESI-TOF)  $m/z$ :  $[M+H]^+$  calculated for  $C_{47}H_{46}O_2P$ : 673.3230, found: 673.3207.

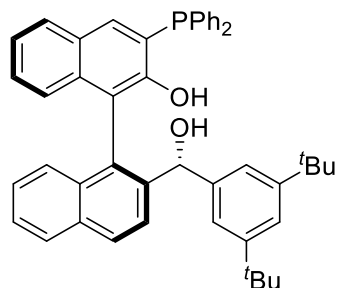

**(S)-2'-((R)-(3,5-di-tert-butylphenyl)(hydroxy)methyl)-3-(diphenylphosphanyl)-[1,1'-binaphthalen]-2-ol (L1):**

White Solid, mp 93 – 106 °C;  $^1H$  NMR (400 MHz, Chloroform-*d*)  $\delta$  7.86 (d,  $J = 8.7$  Hz, 1H), 7.81 (d,  $J = 8.1$  Hz, 1H), 7.58-7.53 (m, 2H), 7.44-7.30 (m, 12H), 7.22-7.18 (m, 1H), 7.16-7.08 (m, 3H), 7.07-7.02 (m, 1H), 6.87 (d,  $J = 1.8$  Hz, 2H), 6.81 (d,  $J = 8.3$  Hz, 1H), 5.85 (s, 1H), 5.64 (s, 1H), 1.09 (s, 18H);  $^{13}C$  NMR (100 MHz, Chloroform-*d*)  $\delta$  152.5, 152.4, 150.5, 142.2, 142.0, 135.2, 135.2, 135.0, 134.7, 134.2, 134.1, 134.0, 133.9, 133.5, 132.8, 129.8, 129.6, 129.5, 129.1, 129.1, 129.0, 128.9, 128.9, 128.9, 128.4, 128.3, 127.5, 126.8, 126.5, 126.4, 126.0, 125.7, 125.2, 124.0, 121.2, 120.5, 117.9, 73.8, 34.9, 31.5;  $^{31}P$  NMR (162 MHz, Chloroform-*d*)  $\delta$  -17.18; HRMS (ESI-TOF)  $m/z$ :  $[M+H]^+$  calculated for  $C_{47}H_{46}O_2P$ : 673.3230, found: 673.3241.

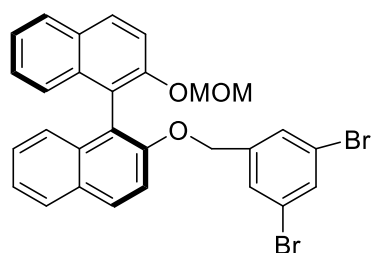

**(S)-2-((3,5-dibromobenzyl)oxy)-2'-(methoxymethoxy)-1,1'-binaphthalene (L8-a):**

White Solid, mp 68 - 71 °C;  $^1H$  NMR (400 MHz, Chloroform-*d*)  $\delta$  7.92-7.76 (m, 4H), 7.51 (d,  $J = 9.0$  Hz, 1H), 7.34 (s, 1H), 7.29-7.22 (m, 3H), 7.18-7.14 (m, 3H), 7.04 (d,  $J = 9.5$  Hz, 1H), 6.91 (d,  $J = 1.7$  Hz, 2H), 5.03 (d,  $J = 6.8$  Hz, 1H), 4.92-4.87 (m, 2H), 4.82 (d,  $J = 13.0$  Hz, 1H), 3.00 (s, 3H).  $^{13}C$  NMR (100 MHz, Chloroform-*d*)  $\delta$  153.5, 152.8, 141.6, 134.2, 134.0, 133.1, 130.0, 129.9, 129.7, 129.6, 128.4, 128.3, 128.0, 126.7,

126.6, 125.7, 125.3, 124.3, 124.2, 122.9, 121.2, 120.9, 117.3, 115.8, 95.2, 69.8, 55.9.  
 HRMS (ESI-TOF)  $m/z$ :  $[M+ Na]^+$  calculated for  $C_{29}H_{22}Br_2NaO_3$ : 598.9828, found:  
 600.9807.

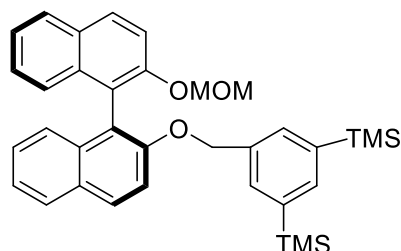

**(S)-5-(((2'-(methoxymethoxy)-[1,1'-binaphthalen]-2-yl)oxy)methyl)-1,3-phenylene bis(trimethylsilane) (L8-b):**

White Solid, mp 87 – 94 °C;  $^1H$  NMR (400 MHz, Chloroform-*d*)  $\delta$  7.82 (dd,  $J = 11.0$ , 9.0 Hz, 2H), 7.76-7.70 (m, 2H), 7.44 (d,  $J = 9.0$  Hz, 1H), 7.37 (d,  $J = 9.0$  Hz, 1H), 7.31 (s, 1H), 7.22-7.16 (m, 2H), 7.11-7.04 (m, 4H), 6.98 (s, 2H), 4.94-4.80 (m, 4H), 2.96 (s, 3H), -0.00 (s, 18H).  $^{13}C$  NMR (100 MHz, Chloroform-*d*)  $\delta$  155.4, 153.8, 140.5, 138.4, 136.6, 135.3, 135.2, 133.4, 131.0, 130.6, 130.5, 129.1, 129.0, 127.5, 126.6, 125.2, 124.9, 122.4, 121.8, 118.5, 117.1, 96.3, 72.9, 56.9, -0.0. HRMS (ESI-TOF)  $m/z$ :  $[M+ Na]^+$  calculated for  $C_{35}H_{40}NaO_3Si_2$ : 587.2408, found: 587.2427.

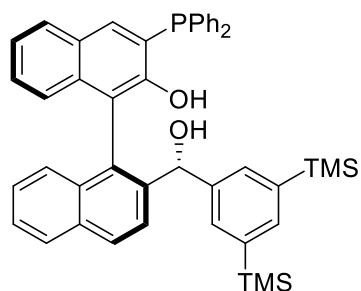

**(S)-2'-((R)-(3,5-bis(trimethylsilyl)phenyl)(hydroxy)methyl)-3-(diphenylphosphanyl)-[1,1'-binaphthalen]-2-ol (L8):**

White Solid, mp 92 – 104 °C;  $^1H$  NMR (400 MHz, Chloroform-*d*)  $\delta$  7.78 (d,  $J = 8.6$  Hz, 1H), 7.71 (d,  $J = 8.0$  Hz, 1H), 7.47 (dd,  $J = 8.4$ , 3.5 Hz, 2H), 7.31-7.19 (m, 13H), 7.11-7.04 (m, 5H), 6.96 (t,  $J = 7.1$  Hz, 1H), 6.71 (d,  $J = 8.3$  Hz, 1H), 5.71 (s, 1H), 5.59 (s, 1H), -0.00 (s, 18H).  $^{13}C$  NMR (100 MHz, Chloroform-*d*)  $\delta$  153.5, 153.4, 143.0, 142.0, 140.2, 138.0, 136.7, 136.6, 136.5, 136.4, 136.1 (d,  $J = 4.1$  Hz), 135.8, 135.2, 135.1, 135.0, 134.9, 134.5, 133.8, 132.8, 130.8, 130.7, 130.3, 130.2, 130.1 (d,  $J = 2.2$  Hz),

129.9, 129.8 (d,  $J = 2.2$  Hz), 129.8, 129.4, 129.3, 128.4, 127.8, 127.5, 126.6, 126.0, 124.9, 118.6, 74.6, 0.0.  $^{31}\text{P}$  NMR (162 MHz, Chloroform-*d*)  $\delta$  -17.57; HRMS (ESI-TOF)  $m/z$ :  $[\text{M} + \text{Na}]^+$  calculated for  $\text{C}_{45}\text{H}_{45}\text{NaO}_2\text{PSi}_2$ : 727.2588, found: 727.2590.

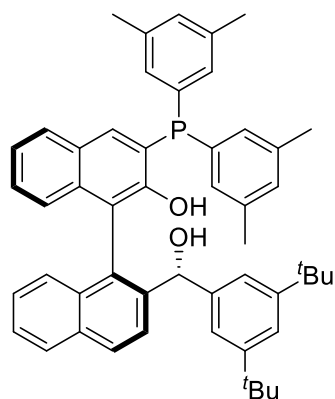

**(*S*)-3-(bis(3,5-dimethylphenyl)phosphaneyl)-2'-((*R*)-(3,5-di-tert-butylphenyl)(hydroxy)methyl)-[1,1'-binaphthalen]-2-ol (L9):**

White Solid, mp 99 – 115 °C;  $^1\text{H}$  NMR (400 MHz, Chloroform-*d*)  $\delta$  7.86 (d,  $J = 8.7$  Hz, 1H), 7.80 (d,  $J = 8.1$  Hz, 1H), 7.59 (dd,  $J = 13.7$  Hz, 2H), 7.44-7.30 (m, 2H), 7.21-6.79 (m, 14H), 5.65 (s, 1H), 2.27 (d,  $J = 6.3$  Hz, 1H), 2.20 (d,  $J = 5.3$  Hz, 11H), 1.09 (s, 18H).  $^{13}\text{C}$  NMR (100 MHz,  $\text{CDCl}_3$ )  $\delta$  152.5, 152.3, 150.4, 142.3, 141.9, 138.5, 138.4, 138.4, 138.3, 135.4, 135.4, 135.0, 133.5, 132.8, 131.8, 131.6, 131.6, 131.5, 131.4, 129.8, 129.6, 129.1, 129.1, 128.4, 128.3, 127.4, 126.7, 126.5, 126.3, 125.7, 125.2, 123.9, 121.0, 120.5, 117.9, 73.7, 34.9, 31.5, 21.5.  $^{31}\text{P}$  NMR (162 MHz, Chloroform-*d*)  $\delta$  -16.84; HRMS (ESI-TOF)  $m/z$ :  $[\text{M} + \text{Na}]^+$  calculated for  $\text{C}_{51}\text{H}_{53}\text{NaO}_2\text{P}$ : 751.3675, found: 751.3665.

**3.3. General procedure for the asymmetric version for the Rh/Cu-cocatalyzed (3+2) annulation of silacycles with internal alkynes.**

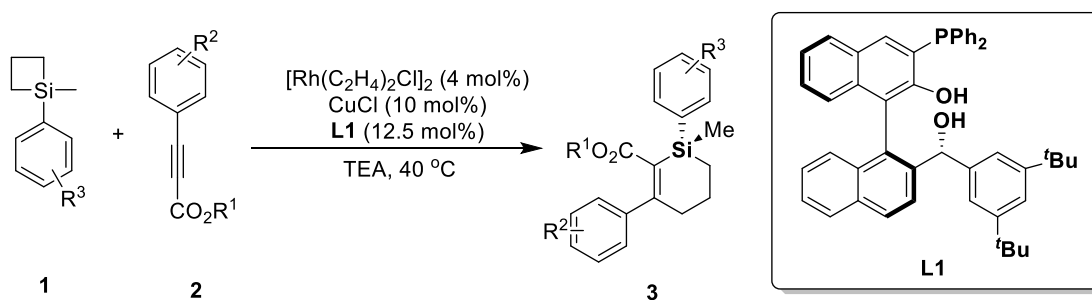

Silacyclobutane **1** (0.2 mmol),  $[\text{Rh}(\text{C}_2\text{H}_4)_2\text{Cl}]_2$  (3.2 mg, 0.008 mmol), CuCl (2.0 mg,

0.02 mmol) and chiral Ar-BINMOL-Phos (**L1**) (16.8 mg, 0.025 mmol) in TEA (2 mL) was stirred at room temperature for 30 min. Then the substrate **2** (2.5 eq, 0.5 mmol) was added to the reaction mixture, and the reaction was stirred at 40 °C for 14 h. Upon reaction completion, the mixture was concentrated under reduced vacuum. The residue was purified by silica gel flash column chromatography (eluent: PE and EtOAc) to afford **3**. The *er* value was detected by chiral HPLC.

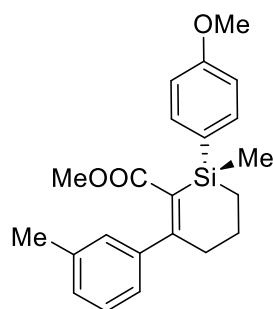

**Methyl (S)-1-(4-methoxyphenyl)-1-methyl-3-(m-tolyl)-1,4,5,6-tetrahydrosilole-2-carboxylate (3a):**

Yellow oil (38.1 mg, 52% yield),  $[\alpha]_D^{25} = + 8.3$  (c = 1.09, CHCl<sub>3</sub>). Enantiomeric excess was determined by HPLC with a Chiralpak AD-H column (hexanes: 2-propanol = 99:1, 0.8 mL/min, 254 nm, 80:20 *er*); major enantiomer  $t_r = 9.558$  min, minor enantiomer  $t_r = 8.253$  min.

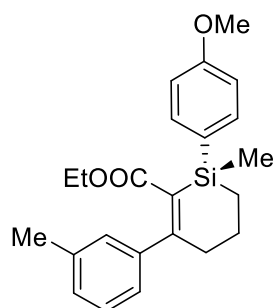

**Ethyl (S)-1-(4-methoxyphenyl)-1-methyl-3-(m-tolyl)-1,4,5,6-tetrahydrosilole-2-carboxylate (3b):**

Colorless oil (25.1 mg, 33% yield),  $[\alpha]_D^{25} = + 14.6$  (c = 0.67, CHCl<sub>3</sub>). Enantiomeric excess was determined by HPLC with a Chiralpak AD-H column (hexanes: 2-propanol = 99:1, 0.8 mL/min, 254 nm, 82:18 *er*); major enantiomer  $t_r = 9.597$  min, minor enantiomer  $t_r = 8.538$  min.

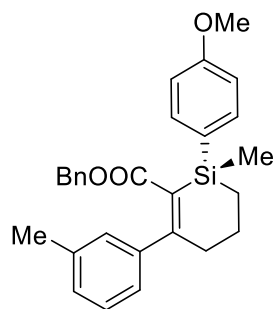

**Benzyl (S)-1-(4-methoxyphenyl)-1-methyl-3-(m-tolyl)-1,4,5,6-tetrahydrosililine-2-carboxylate (3c):**

Colorless oil (36.3 mg, 41% yield),  $[\alpha]_D^{25} = +5.6$  ( $c = 0.97$ ,  $\text{CHCl}_3$ ). Enantiomeric excess was determined by HPLC with a Chiralpak OX-H column (hexanes: 2-propanol = 98:2, 0.8 mL/min, 254 nm, 82:18 *er*); major enantiomer  $t_r = 10.021$  min, minor enantiomer  $t_r = 8.941$  min.

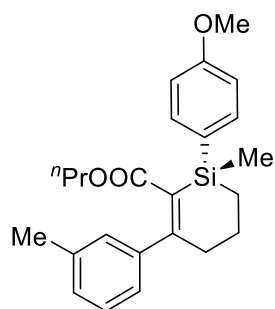

**Propyl (S)-1-(4-methoxyphenyl)-1-methyl-3-(m-tolyl)-1,4,5,6-tetrahydrosililine-2-carboxylate (3d):**

Colorless oil (23.7 mg, 30% yield),  $[\alpha]_D^{25} = +9.5$  ( $c = 0.66$ ,  $\text{CHCl}_3$ ). Enantiomeric excess was determined by HPLC with a Chiralpak AD-H column (hexanes: 2-propanol = 95:5, 0.8 mL/min, 254 nm, 83:17 *er*); major enantiomer  $t_r = 6.401$  min, minor enantiomer  $t_r = 5.811$  min.

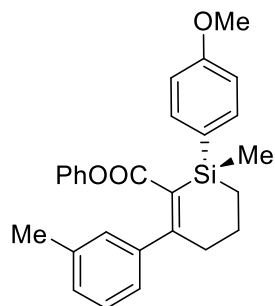

**Phenyl (S)-1-(4-methoxyphenyl)-1-methyl-3-(m-tolyl)-1,4,5,6-tetrahydrosililine-2-carboxylate (3e):**

Colorless oil (30.0 mg, 35% yield),  $[\alpha]_D^{25} = +16.2$  ( $c = 0.54$ ,  $\text{CHCl}_3$ ). Enantiomeric

excess was determined by HPLC with a Chiralpak OX-H column (hexanes: 2-propanol = 99:1, 0.5 mL/min, 254 nm, 85:15 *er*); major enantiomer  $t_r = 13.431$  min, minor enantiomer  $t_r = 15.078$  min.

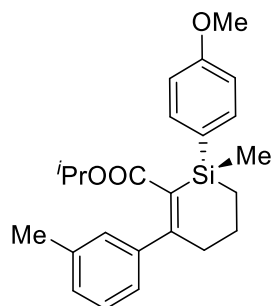

**Isopropyl (*S*)-1-(4-methoxyphenyl)-1-methyl-3-(*m*-tolyl)-1,4,5,6-tetrahydrosilole-2-carboxylate (**3f**):**

Colorless oil (37.9 mg, 48% yield),  $[\alpha]_D^{25} = +10.4$  ( $c = 1.19$ ,  $\text{CHCl}_3$ ). Enantiomeric excess was determined by HPLC with a Chiralpak AD-H column (hexanes: 2-propanol = 98:2, 0.8 mL/min, 254 nm, 86:14 *er*); major enantiomer  $t_r = 9.165$  min, minor enantiomer  $t_r = 8.271$  min.

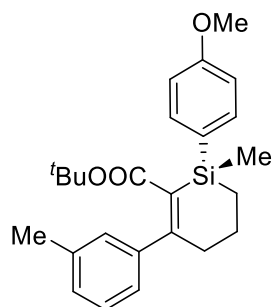

**Tert-butyl (*S*)-1-(4-methoxyphenyl)-1-methyl-3-(*m*-tolyl)-1,4,5,6-tetrahydrosilole-2-carboxylate (**3g**):**

Yellow oil (36.7 mg, 45% yield),  $[\alpha]_D^{25} = +9$  ( $c = 0.91$ ,  $\text{CHCl}_3$ ). Enantiomeric excess was determined by HPLC with a Chiralpak OJ-H column (hexanes: 2-propanol = 95:5, 0.6 mL/min, 254 nm, 91:9 *er*); major enantiomer  $t_r = 7.238$  min, minor enantiomer  $t_r = 11.427$  min.

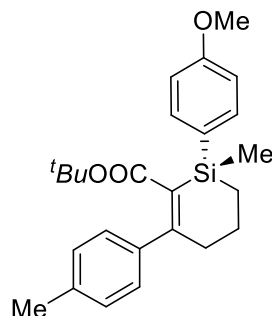



**Tert-butyl (S)-1-(4-methoxyphenyl)-1-methyl-3-(p-tolyl)-1,4,5,6-tetrahydrosilole-2-carboxylate (3h):**

Yellow oil (44.5 mg, 52% yield),  $[\alpha]_D^{25} = + 3.1$  ( $c = 0.64$ ,  $\text{CHCl}_3$ ). Enantiomeric excess was determined by HPLC with a Chiralpak OJ-H column (hexanes: 2-propanol = 98:2, 0.8 mL/min, 254 nm, 87:13 *er*); major enantiomer  $t_r = 14.725$  min, minor enantiomer  $t_r = 22.732$  min.

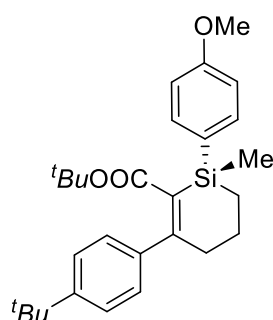

**Tert-butyl (S)-3-(4-(tert-butyl)phenyl)-1-(4-methoxyphenyl)-1-methyl-1,4,5,6-tetrahydrosilole-2-carboxylate (3i):**

Yellow oil (47.7 mg, 53% yield),  $[\alpha]_D^{25} = + 11.7$  ( $c = 0.44$ ,  $\text{CHCl}_3$ ). Enantiomeric excess was determined by HPLC with a Chiralpak OJ-H column (hexanes: 2-propanol = 99:1, 0.4 mL/min, 254 nm, 88:12 *er*); major enantiomer  $t_r = 29.537$  min, minor enantiomer  $t_r = 42.964$  min.

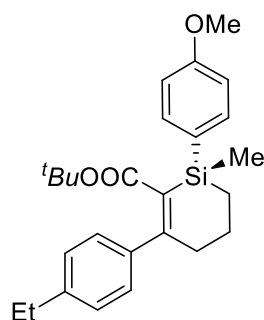

**Tert-butyl (S)-3-(4-ethylphenyl)-1-(4-methoxyphenyl)-1-methyl-1,4,5,6-tetrahydrosilole-2-carboxylate (3j):**

Yellow oil (45.6 mg, 54% yield),  $[\alpha]_D^{25} = + 13.2$  ( $c = 0.54$ ,  $\text{CHCl}_3$ ). Enantiomeric excess was determined by HPLC with a Chiralpak OJ-H column (hexanes: 2-propanol = 99:1, 0.4 mL/min, 254 nm, 87:13 *er*); major enantiomer  $t_r = 45.383$  min, minor enantiomer  $t_r = 68.063$  min.

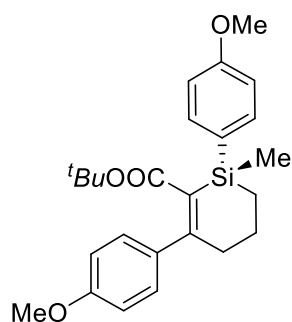

**Tert-butyl (S)-1,3-bis(4-methoxyphenyl)-1-methyl-1,4,5,6-tetrahydrosililine-2-carboxylate (3k):**

Colorless oil (36.5 mg, 43% yield),  $[\alpha]_D^{25} = +10.1$  ( $c = 0.47$ ,  $\text{CHCl}_3$ ). Enantiomeric excess was determined by HPLC with a Chiralpak OJ-H column (hexanes: 2-propanol = 97:3, 0.6 mL/min, 254 nm, 86:14 *er*); major enantiomer  $t_r = 13.998$  min, minor enantiomer  $t_r = 26.843$  min.

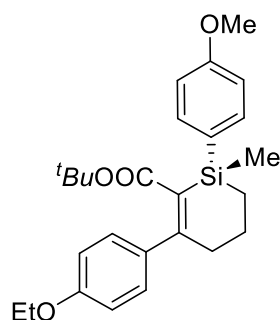

**Tert-butyl (S)-3-(4-ethoxyphenyl)-1-(4-methoxyphenyl)-1-methyl-1,4,5,6-tetrahydrosililine-2-carboxylate (3l):**

Colorless oil (44.7 mg, 51% yield),  $[\alpha]_D^{25} = +8.7$  ( $c = 1.01$ ,  $\text{CHCl}_3$ ). Enantiomeric excess was determined by HPLC with a Chiralpak OJ-H column (hexanes: 2-propanol = 99:1, 0.6 mL/min, 254 nm, 94:6 *er*); major enantiomer  $t_r = 16.134$  min, minor enantiomer  $t_r = 35.521$  min.

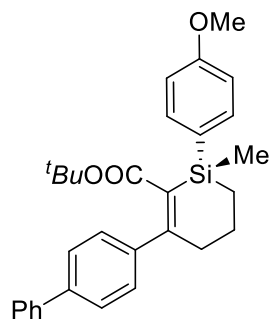

**Tert-butyl (S)-3-([1,1'-biphenyl]-4-yl)-1-(4-methoxyphenyl)-1-methyl-1,4,5,6-tetrahydrosililine-2-carboxylate (3m):**

Yellow oil (45.2 mg, 48% yield),  $[\alpha]_D^{25} = -6.7$  ( $c = 0.30$ ,  $\text{CHCl}_3$ ). Enantiomeric excess

was determined by HPLC with a Chiralpak OD-H + OD-H column (hexanes: 2-propanol = 98:2, 0.8 mL/min, 254 nm, 85:15 *er*); major enantiomer  $t_r$  = 41.056 min, minor enantiomer  $t_r$  = 45.257 min.

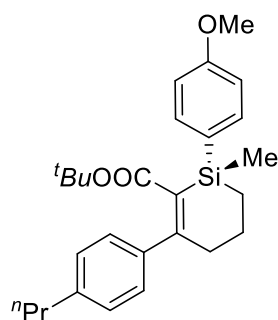

**Tert-butyl (S)-1-(4-methoxyphenyl)-1-methyl-3-(4-propylphenyl)-1,4,5,6-tetrahydrosilole-2-carboxylate (3n):**

Yellow oil (42.7 mg, 49% yield),  $[\alpha]_D^{25} = +2.3$  ( $c = 0.55$ ,  $\text{CHCl}_3$ ). Enantiomeric excess was determined by HPLC with a Chiralpak OJ-H column (hexanes: 2-propanol = 99:1, 0.4 mL/min, 254 nm, 86:14 *er*); major enantiomer  $t_r$  = 40.847 min, minor enantiomer  $t_r$  = 59.647 min.

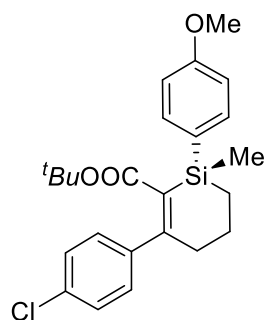

**Tert-butyl (S)-3-(4-chlorophenyl)-1-(4-methoxyphenyl)-1-methyl-1,4,5,6-tetrahydrosilole-2-carboxylate (3o):**

Light yellow oil (35.1 mg, 41% yield),  $[\alpha]_D^{25} = +10.5$  ( $c = 0.33$ ,  $\text{CHCl}_3$ ). Enantiomeric excess was determined by HPLC with a Chiralpak OJ-H column (hexanes: 2-propanol = 99:1, 0.6 mL/min, 254 nm, 90:10 *er*); major enantiomer  $t_r$  = 11.111 min, minor enantiomer  $t_r$  = 26.919 min.

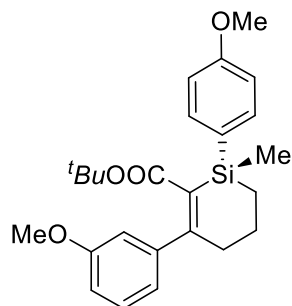

**Tert-butyl (S)-3-(3-methoxyphenyl)-1-(4-methoxyphenyl)-1-methyl-1,4,5,6-tetrahydrosiline-2-carboxylate (3p):**

Colorless oil (38.2 mg, 45% yield),  $[\alpha]_{\text{D}}^{25} = +2.3$  ( $c = 0.65$ ,  $\text{CHCl}_3$ ). Enantiomeric excess was determined by HPLC with a Chiralpak OJ-H column (hexanes: 2-propanol = 99:1, 0.6 mL/min, 254 nm, 92:8 *er*); major enantiomer  $t_{\text{r}} = 13.94$  min, minor enantiomer  $t_{\text{r}} = 29.795$  min.

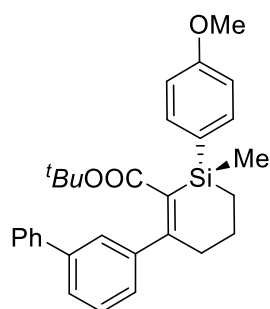

**Tert-butyl (S)-3-([1,1'-biphenyl]-3-yl)-1-(4-methoxyphenyl)-1-methyl-1,4,5,6-tetrahydrosiline-2-carboxylate (3q):**

Yellow oil (45.1 mg, 48% yield),  $[\alpha]_{\text{D}}^{25} = +2.84$  ( $c = 0.58$ ,  $\text{CHCl}_3$ ). Enantiomeric excess was determined by HPLC with a Chiralpak OP-H column (hexanes: 2-propanol = 99:1, 0.6 mL/min, 254 nm, 86:14 *er*); major enantiomer  $t_{\text{r}} = 21.172$  min, minor enantiomer  $t_{\text{r}} = 27.967$  min.

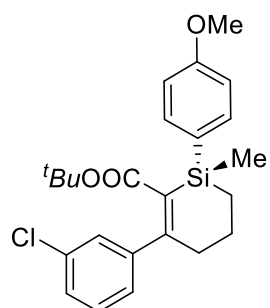

**Tert-butyl (S)-3-(3-chlorophenyl)-1-(4-methoxyphenyl)-1-methyl-1,4,5,6-tetrahydrosiline-2-carboxylate (3r):**

Colorless oil (19.7 mg, 23% yield),  $[\alpha]_{\text{D}}^{25} = -27$  ( $c = 0.1$ ,  $\text{CHCl}_3$ ). Enantiomeric excess was determined by HPLC with a Chiralpak OJ-H column (hexanes: 2-propanol = 98:2, 0.6 mL/min, 254 nm, 87:13 *er*); major enantiomer  $t_{\text{r}} = 9.685$  min, minor enantiomer  $t_{\text{r}} = 19.648$  min.

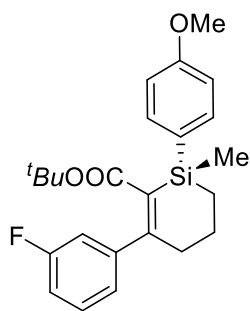

**Tert-butyl (S)-3-(3-fluorophenyl)-1-(4-methoxyphenyl)-1-methyl-1,4,5,6-tetrahydrosililine-2-carboxylate (3s):**

Yellow oil (20.6 mg, 25% yield),  $[\alpha]_D^{25} = -7.4$  ( $c = 0.22$ ,  $\text{CHCl}_3$ ). Enantiomeric excess was determined by HPLC with a Chiralpak OJ-H column (hexanes: 2-propanol = 98:2, 0.6 mL/min, 254 nm, 87:13 *er*); major enantiomer  $t_r = 9.112$  min, minor enantiomer  $t_r = 24.856$  min.

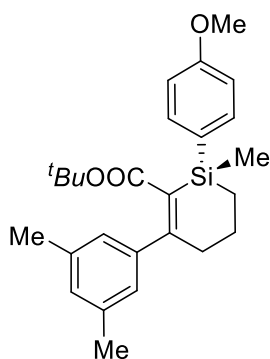

**Tert-butyl (S)-3-(3,5-dimethylphenyl)-1-(4-methoxyphenyl)-1-methyl-1,4,5,6-tetrahydrosililine-2-carboxylate (3t):**

Yellow oil (38.0 mg, 45% yield),  $[\alpha]_D^{25} = +5.8$  ( $c = 0.72$ ,  $\text{CHCl}_3$ ). Enantiomeric excess was determined by HPLC with a Chiralpak OJ-H column (hexanes: 2-propanol = 99:1, 0.4 mL/min, 254 nm, 90:10 *er*); major enantiomer  $t_r = 43.165$  min, minor enantiomer  $t_r = 82.033$  min.

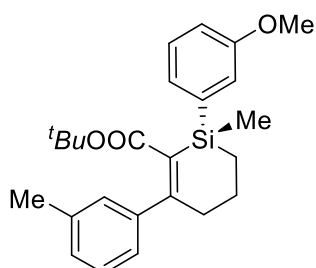

**Tert-butyl (S)-1-(3-methoxyphenyl)-1-methyl-3-(m-tolyl)-1,4,5,6-tetrahydrosililine-2-carboxylate (3u):**

Colorless oil (22.1 mg, 27% yield),  $[\alpha]_D^{25} = +8.6$  ( $c = 0.22$ ,  $\text{CHCl}_3$ ). Enantiomeric

excess was determined by HPLC with a Chiralpak OJ-H column (hexanes: 2-propanol = 98:2, 0.6 mL/min, 254 nm, 75:25 *er*); major enantiomer  $t_r = 22.798$  min, minor enantiomer  $t_r = 30.510$  min.

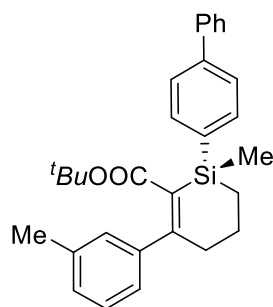

**Tert-butyl**                      **(S)-1-([1,1'-biphenyl]-4-yl)-1-methyl-3-(m-tolyl)-1,4,5,6-tetrahydrosilole-2-carboxylate (3v):**

Colorless oil (37.2 mg, 41% yield),  $[\alpha]_D^{25} = -5.2$  ( $c = 0.31$ ,  $\text{CHCl}_3$ ). Enantiomeric excess was determined by HPLC with a Chiralpak phenomenex column (hexanes: 2-propanol = 99:1, 0.8 mL/min, 254 nm, 84:16 *er*); major enantiomer  $t_r = 5.662$  min, minor enantiomer  $t_r = 5.176$  min.

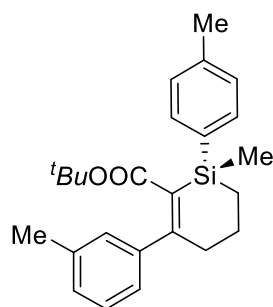

**Tert-butyl**                      **(S)-1-methyl-3-(m-tolyl)-1-(p-tolyl)-1,4,5,6-tetrahydrosilole-2-carboxylate (3w):**

Colorless oil (24.3 mg, 31% yield),  $[\alpha]_D^{25} = +7.4$  ( $c = 0.20$ ,  $\text{CHCl}_3$ ). Enantiomeric excess was determined by HPLC with a Chiralpak AD-H + OJ-H column (hexanes: 2-propanol = 99.5:0.5, 0.8 mL/min, 254 nm, 83:17 *er*); major enantiomer  $t_r = 53.514$  min, minor enantiomer  $t_r = 60.933$  min.

**Table S7. The effect of chiral phosphoramidite ligands in this reaction.<sup>a</sup>**

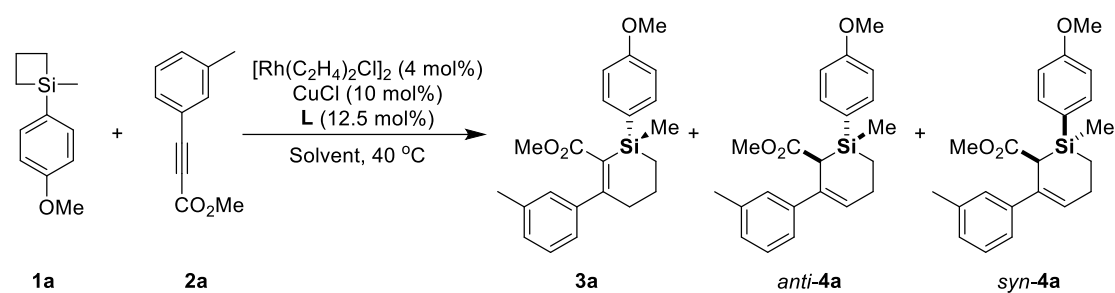

| Entry | Ligand | solvent | Con.(%) <sup>b</sup> | 3a:4a (%) <sup>b</sup> | dr of 4a (%) <sup>b</sup> | er of 3a (%) <sup>c</sup> |
|-------|--------|---------|----------------------|------------------------|---------------------------|---------------------------|
| 1     | L1     | Tol     | 17                   | 77:23                  | 73:27                     | 64:36                     |
| 2     | L2     | Tol     | 25                   | 63:37                  | 69:31                     | 62:38                     |
| 3     | L3     | Tol     | 40                   | 77:23                  | 68:32                     | 64:36                     |
| 4     | L4     | Tol     | 36                   | 59:41                  | 55:45                     | 56:44                     |
| 5     | L5     | Tol     | 20                   | 79:21                  | 64:36                     | 61:39                     |
| 6     | L6     | Tol     | 24                   | 72:68                  | 70:30                     | 64:36                     |
| 7     | L7     | Tol     | 52                   | 83:17                  | 59:41                     | 58:42                     |
| 8     | L10    | Tol     | < 5                  | /                      | /                         | 67:33                     |
| 9     | L11    | Tol     | nr                   | /                      | /                         | /                         |
| 10    | L12    | Tol     | < 5                  | /                      | /                         | 84:16                     |
| 11    | L13    | Tol     | nr                   | /                      | /                         | /                         |
| 12    | L14    | Tol     | nr                   | /                      | /                         | /                         |
| 13    | L15    | Tol     | < 5                  | /                      | /                         | 50:50                     |
| 14    | L16    | Tol     | nr                   | /                      | /                         | /                         |
| 15    | L17    | Tol     | < 5                  | /                      | /                         | 53:47                     |
| 16    | L1     | TEA     | 54                   | 100:0                  | /                         | 80:20                     |
| 17    | L2     | TEA     | 10                   | 100:0                  | /                         | 81:19                     |
| 18    | L3     | TEA     | 9                    | 100:0                  | /                         | 81:19                     |
| 19    | L4     | TEA     | 21                   | 100:0                  | /                         | 72:22                     |
| 20    | L5     | TEA     | 11                   | 100:0                  | /                         | 81:19                     |
| 21    | L6     | TEA     | 10                   | 100:0                  | /                         | 81:19                     |
| 22    | L7     | TEA     | 13                   | 100:0                  | /                         | 67:33                     |
| 23    | L8     | TEA     | 21                   | 100:0                  | /                         | 79:21                     |
| 24    | L9     | TEA     | 56                   | 100:0                  | /                         | 80:20                     |
| 25    | L10    | TEA     | nr                   | /                      | /                         | /                         |
| 26    | L11    | TEA     | nr                   | /                      | /                         | /                         |
| 27    | L12    | TEA     | nr                   | /                      | /                         | /                         |
| 28    | L13    | TEA     | nr                   | /                      | /                         | /                         |
| 29    | L14    | TEA     | nr                   | /                      | /                         | /                         |
| 30    | L15    | TEA     | nr                   | /                      | /                         | /                         |
| 31    | L16    | TEA     | nr                   | /                      | /                         | /                         |
| 32    | L17    | TEA     | nr                   | /                      | /                         | /                         |
| 33    | L18    | TEA     | nr                   | /                      | /                         | /                         |

|    |            |     |    |   |   |   |
|----|------------|-----|----|---|---|---|
| 34 | <b>L19</b> | TEA | nr | / | / | / |
| 35 | <b>L20</b> | TEA | nr | / | / | / |

<sup>a</sup>All the reactions were run on a 0.2 mmol scale in 2.0 mL solvents for 14 h. <sup>b</sup>Determined by GC-MS. <sup>c</sup>*er* of **3a** was determined by chiral HPLC analysis.

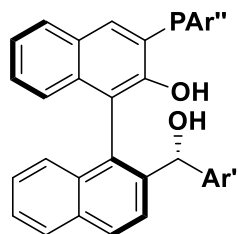

**Ar-BINMOL-Phos**

|           |                                                             |                  |
|-----------|-------------------------------------------------------------|------------------|
| <b>L1</b> | Ar' = 3,5-( <i>t</i> -Bu) <sub>2</sub> -Ph                  | Ar'' = Ph        |
| <b>L2</b> | Ar' = 3,5-(C <sub>6</sub> H <sub>5</sub> ) <sub>2</sub> -Ph | Ar'' = Ph        |
| <b>L3</b> | Ar' = 3,5-(OMe) <sub>2</sub> -Ph                            | Ar'' = Ph        |
| <b>L4</b> | Ar' = 2-SiMe <sub>3</sub> -Ph                               | Ar'' = Ph        |
| <b>L5</b> | Ar' = 3-OMe-Ph                                              | Ar'' = Ph        |
| <b>L6</b> | Ar' = 4-Me-Ph                                               | Ar'' = Ph        |
| <b>L7</b> | Ar' = naphthy                                               | Ar'' = Ph        |
| <b>L8</b> | Ar' = 3,5-(SiMe <sub>3</sub> ) <sub>2</sub> -Ph             | Ar'' = Ph        |
| <b>L9</b> | Ar' = 3,5-( <i>t</i> -Bu) <sub>2</sub> -Ph                  | Ar'' = 3,5-Me-Ph |

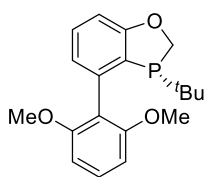

**L10**

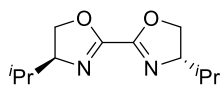

**L11**

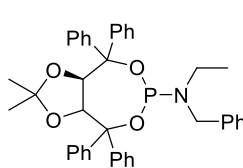

**L12**

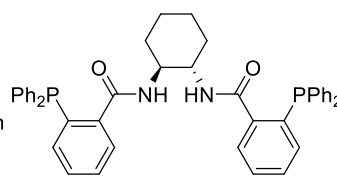

**L13**

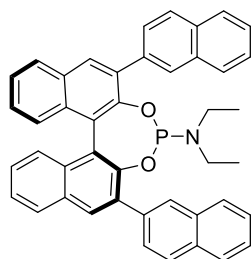

**L14**

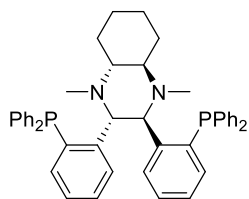

**L15**

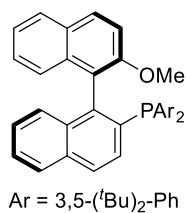

**L16**

Ar = 3,5-(*t*-Bu)<sub>2</sub>-Ph

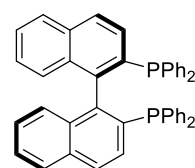

**L17**

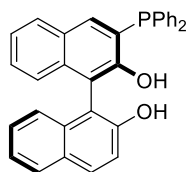

**L18**

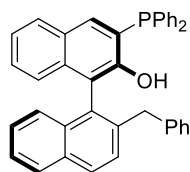

**L19**

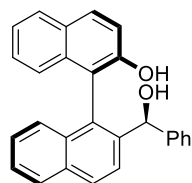

**L20**



**Table S8. The effect of temperature in this reaction.<sup>a</sup>**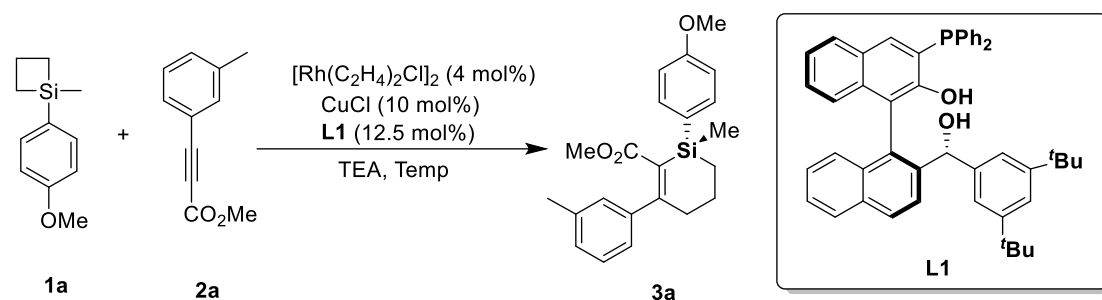

| Entry | Temp | <b>3a</b> (%) <sup>b</sup> | <i>er</i> of <b>3a</b> (%) <sup>c</sup> |
|-------|------|----------------------------|-----------------------------------------|
| 1     | 30   | 18                         | 83:17                                   |
| 2     | 40   | 54                         | 80:20                                   |
| 3     | 50   | 55                         | 77:23                                   |
| 4     | 70   | 85                         | 74:26                                   |

<sup>a</sup>All the reactions were run on a 0.2 mmol scale in 2.0 mL solvents for 14 h. <sup>b</sup>Determined by <sup>1</sup>H NMR.

<sup>c</sup>*er* of **3a** was determined by chiral HPLC analysis.

**Table S9. Comparative Experiment.<sup>a</sup>**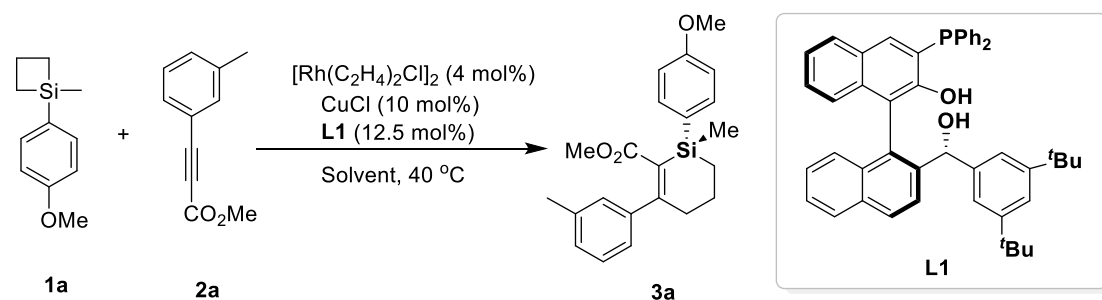

| Entry          | additive     | Solvent | <b>3a</b> (%) <sup>b</sup> | <i>er</i> of <b>3a</b> (%) <sup>c</sup> |
|----------------|--------------|---------|----------------------------|-----------------------------------------|
| 1 <sup>d</sup> | Without CuCl | TEA     | < 10% yield                | /                                       |
| 2 <sup>e</sup> | KOt-Bu       | TEA     | 38                         | 81:19                                   |
| 3 <sup>e</sup> | KOt-Bu       | Tol     | nr                         | /                                       |

<sup>a</sup>All the reactions were run on a 0.2 mmol scale in 2.0 mL solvents for 14 h. <sup>b</sup>Determined by <sup>1</sup>H NMR.

<sup>c</sup>*er* of **3a** was determined by chiral HPLC analysis. <sup>d</sup>Without CuCl. <sup>e</sup>KOt-Bu (12.5 mol%).

### 3.4. General procedure for the synthesis of 4a.

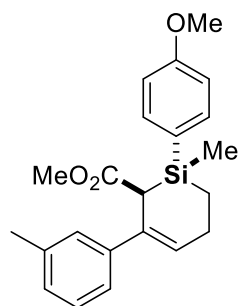

**Methyl** (1*R*,2*S*)-1-(4-methoxyphenyl)-1-methyl-3-(*m*-tolyl)-1,2,5,6-tetrahydro-silole-2-carboxylate (*anti*-4a):

Yellow oil,  $^1\text{H}$  NMR (400 MHz, Chloroform-*d*)  $\delta$  7.48 (d,  $J = 8.4$  Hz, 2H), 7.20-7.07 (m, 3H), 7.02 (d,  $J = 7.4$  Hz, 1H), 6.91 (d,  $J = 8.3$  Hz, 2H), 6.34 (t,  $J = 4.9$  Hz, 1H), 3.81 (s, 3H), 3.65 (s, 3H), 3.51 (s, 1H), 2.76-2.62 (m, 1H), 2.56-2.46 (m, 1H), 2.32 (s, 3H), 1.13-1.01 (m, 2H), 0.39 (s, 3H).  $^{13}\text{C}$  NMR (100 MHz, Chloroform-*d*)  $\delta$  173.9, 161.0, 144.4, 137.9, 135.3, 134.7, 132.8, 128.3, 127.6, 126.7, 123.0, 114.0, 55.2, 51.7, 37.4, 23.2, 21.7, 7.5, -4.8. HRMS (ESI-TOF)  $m/z$ :  $[\text{M}^+ \text{Na}]^+$  calculated for  $\text{C}_{22}\text{H}_{26}\text{NaO}_3\text{Si}$ : 389.1543, found: 389.1547.

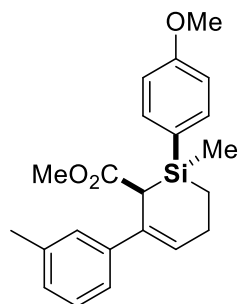

**Methyl** (1*S*,2*S*)-1-(4-methoxyphenyl)-1-methyl-3-(*m*-tolyl)-1,2,5,6-tetrahydro-silole-2-carboxylate (*syn*-4a):

Yellow oil,  $^1\text{H}$  NMR (400 MHz, Chloroform-*d*)  $\delta$  7.48 (d,  $J = 8.6$  Hz, 2H), 7.20-7.10 (m, 3H), 7.03 (d,  $J = 7.2$  Hz, 1H), 6.93 (d,  $J = 8.6$  Hz, 2H), 6.34 (t,  $J = 4.8$  Hz, 1H), 3.82 (s, 3H), 3.34 (s, 1H), 3.18 (s, 3H), 2.94-2.82 (m, 1H), 2.64-2.48 (m, 1H), 2.33 (s, 3H), 1.45-1.36 (m, 1H), 0.96-0.87 (m, 1H), 0.44 (s, 3H).  $^{13}\text{C}$  NMR (100 MHz, Chloroform-*d*)  $\delta$  173.6, 161.1, 144.5, 137.9, 135.8, 134.4, 132.1, 128.3, 127.6, 126.8, 125.6, 123.0, 113.7, 55.2, 51.3, 38.8, 23.7, 21.7, 5.6, -4.3. HRMS (ESI-TOF)  $m/z$ :  $[\text{M}^+ \text{H}]^+$  calculated for  $\text{C}_{22}\text{H}_{27}\text{O}_3\text{Si}$ : 367.1724, found: 367.1715.

#### 4. Downstream transformation of product **3g**.

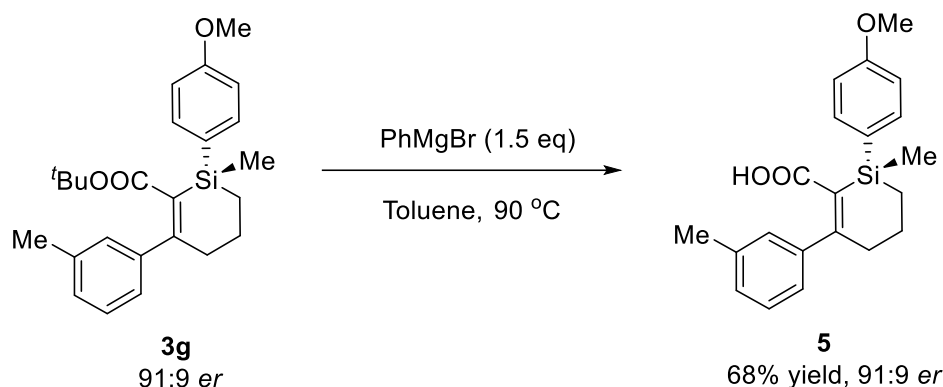

Add toluene (0.1 mL) solution of **3g** (0.2 mol) to PhMgBr (1.5 eq, 0.3 mol) in toluene (0.1 mL). Reflux the mixture for 6 hours under N<sub>2</sub>. After completion of the reaction, pour the mixture into 3% aqueous HCl at 0 °C. Extract the mixture with ethyl acetate. The residue was purified by silica gel flash column chromatography (eluent: PE /EA = 2/1) to afford **5**.

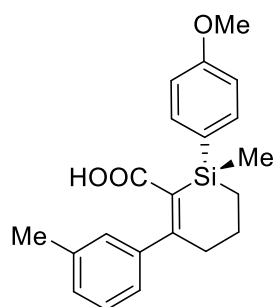

#### **(S)-1-(4-methoxyphenyl)-1-methyl-3-(m-tolyl)-1,4,5,6-tetrahydrosilole-2-carboxylic acid (5):**

White solid (23.9 mg, 68% yield), mp 112 - 118 °C;  $[\alpha]_D^{25} = -2.23$  (c = 0.47, CHCl<sub>3</sub>). <sup>1</sup>H NMR (400 MHz, Chloroform-*d*)  $\delta$  7.45 (d, *J* = 8.6 Hz, 2H), 7.06 (t, *J* = 7.5 Hz, 1H), 7.01-6.89 (m, 3H), 6.82 (d, *J* = 8.5 Hz, 2H), 3.73 (s, 3H), 2.58-2.40 (m, 2H), 2.22 (s, 3H), 1.96-1.80 (m, 2H), 1.01-0.92 (m, 1H), 0.84-0.75 (m, 1H), 0.43 (s, 3H). <sup>13</sup>C NMR (100 MHz, Chloroform-*d*)  $\delta$  175.8, 164.5, 160.8, 144.2, 137.9, 135.9, 128.8, 128.7, 128.2, 127.6, 127.2, 123.8, 113.7, 55.1, 37.3, 21.5, 21.2, 11.4, -3.3. HRMS (ESI-TOF) *m/z*: [M+ Na]<sup>+</sup> calculated for C<sub>21</sub>H<sub>24</sub>NaO<sub>3</sub>Si:375.1387, found:375.1374. Enantiomeric excess was determined by HPLC with a Chiralpak OJ-H column (hexanes: 2-propanol = 90:10, 0.8 mL/min, 254 nm, 91:9 *er*); major enantiomer *t<sub>r</sub>* = 8.439 min, minor enantiomer *t<sub>r</sub>* = 15.628 min.

## 5. Supplementary Figures

Figure S1. NOESY spectrum of 3g. The determination of the structure of product 3g

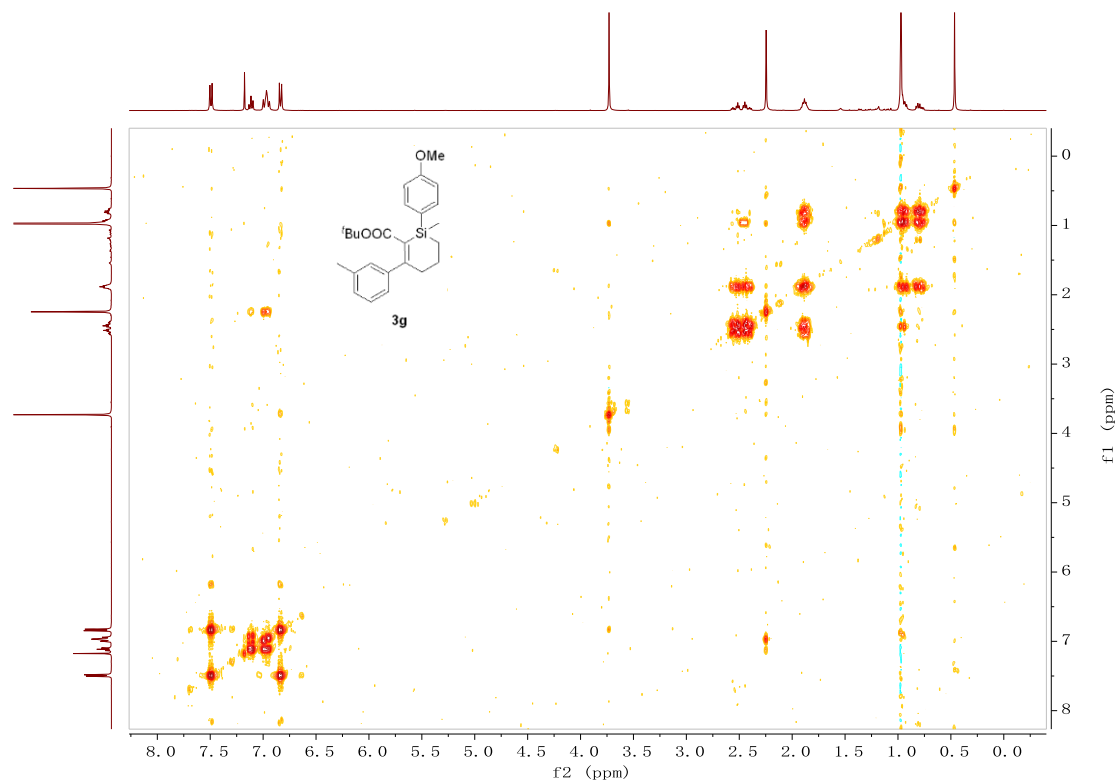

Figure S2. NOESY spectrum of *anti*-4a. The determination of the structure of product *anti*-4a

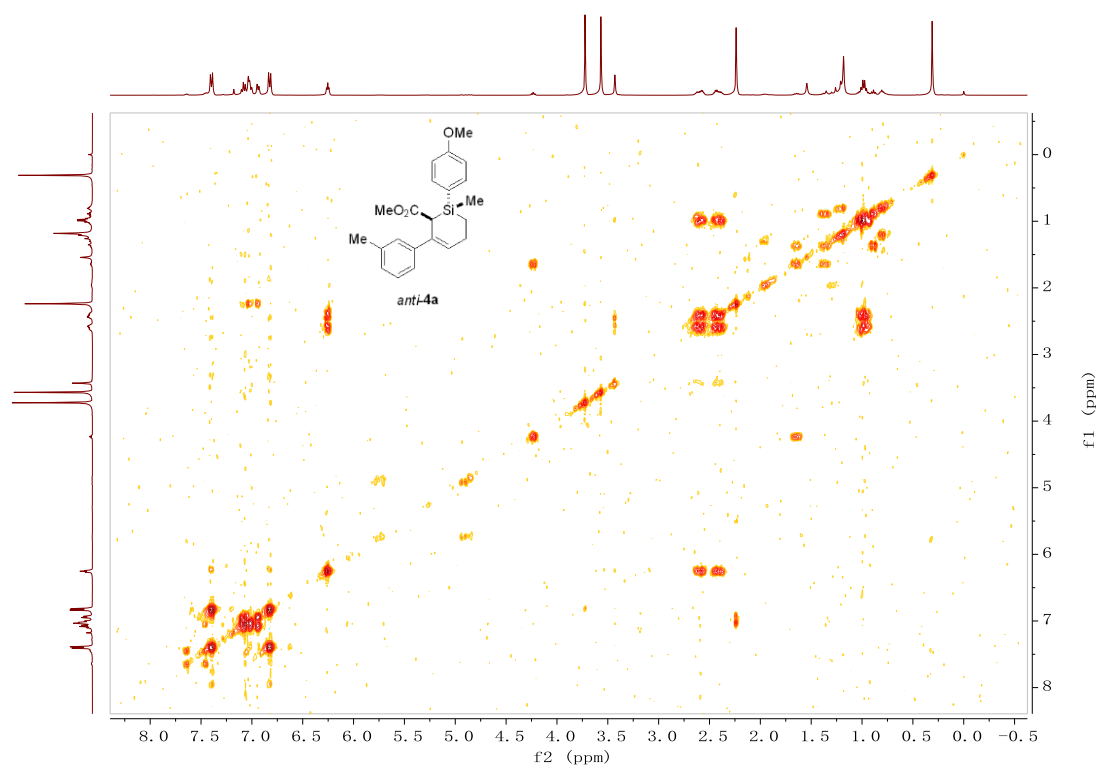

## 6. Determination of Absolute Configuration by ECD Experiments

**ECD experiments:** ECD spectra of **3g**, **3p** at a concentration of  $1.0 \times 10^{-3}$  M in acetonitrile, were recorded in a 1 mm pathlength quartz cuvette, using a MOS-450/AF Circular Dichroism Spectrometer (Bio-Logic, France). The experimental conditions were as follows: bandwidth, 1 nm; wavelength range, 200-600 nm; wavelength step size, 1 nm; time-per-point, 1.0 s; temperature, 25 °C. Acetonitrile was measured under the same conditions to obtain baseline.

**ECD computations:** Geometry optimization of the conformers were carried out in the framework of density functional theory (DFT) using the M06L hybrid density functional and 6-311G(d,p) basis set, IEFPCM in acetonitrile with Gaussian 09 (Gaussian Inc., Wallingford, CT). Frequency calculations were also carried out to confirm the geometries obtained were true minima of the potential energy surface by exhibiting no imaginary frequencies. Rotatory strengths in velocity form (Rvel) and length form (Rlen), oscillator strengths and excitation energies of the 30 lowest electronic transitions were calculated for each conformer employing time-dependent density functional theory (TD-DFT) at M06L/6-311G(d,p), IEFPCM in acetonitrile. Boltzmann-population-weighted composite ECD spectra were then generated with SpecDis.

Figure S3. DFT calculation for the ECD spectrum of chiral product 3p.

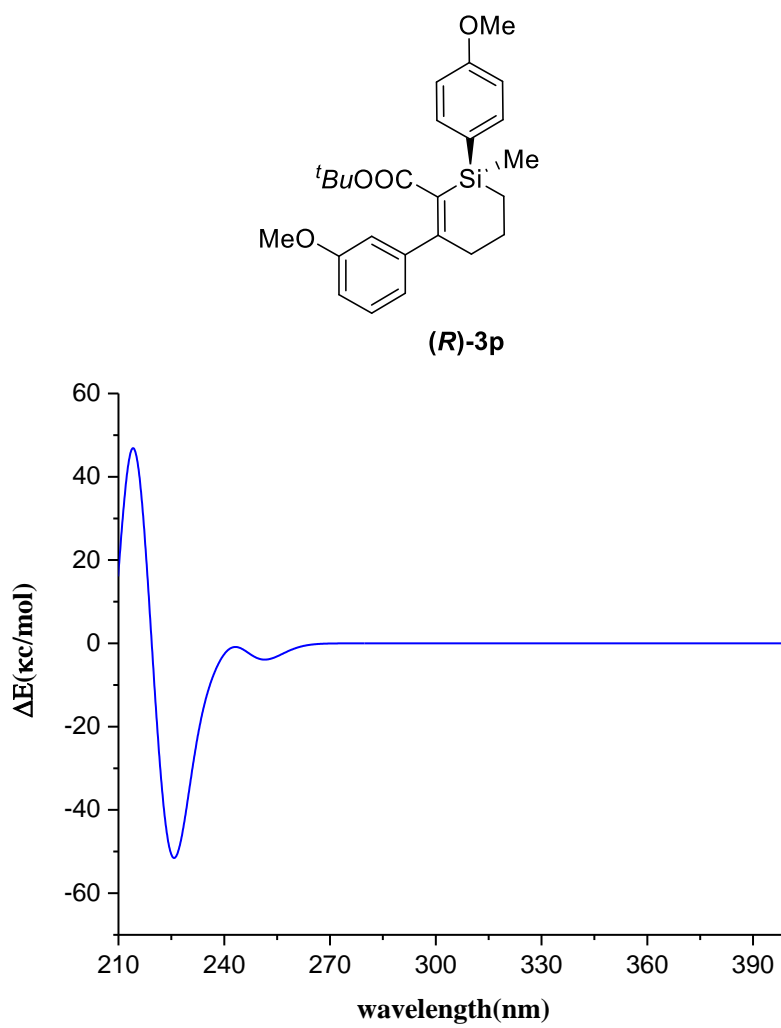

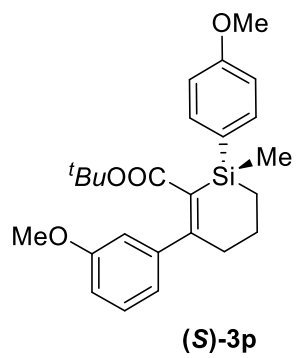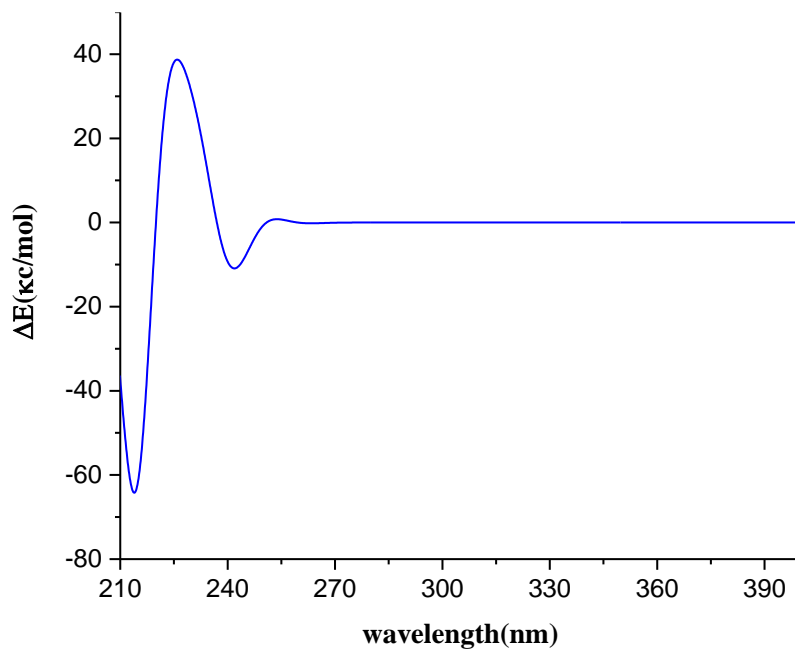



**Figure S4. Experimentally tested ECD spectrum of chiral product 3p ( $1.0 \times 10^{-3}$  M) in  $\text{CH}_3\text{CN}$ .**

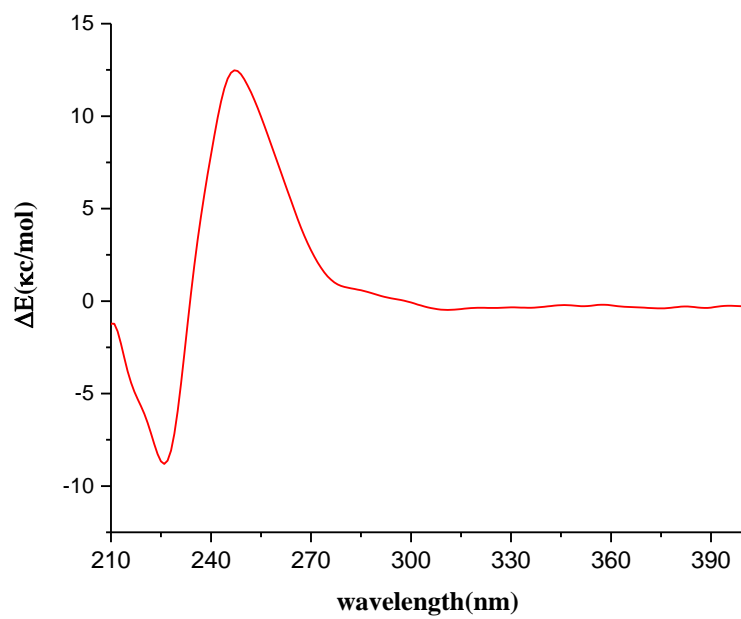

Figure S5. DFT calculation for the ECD spectrum of chiral product 3g.

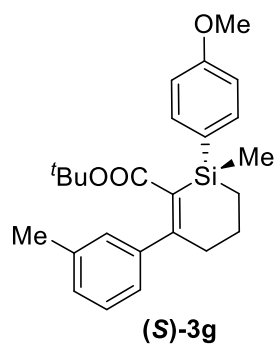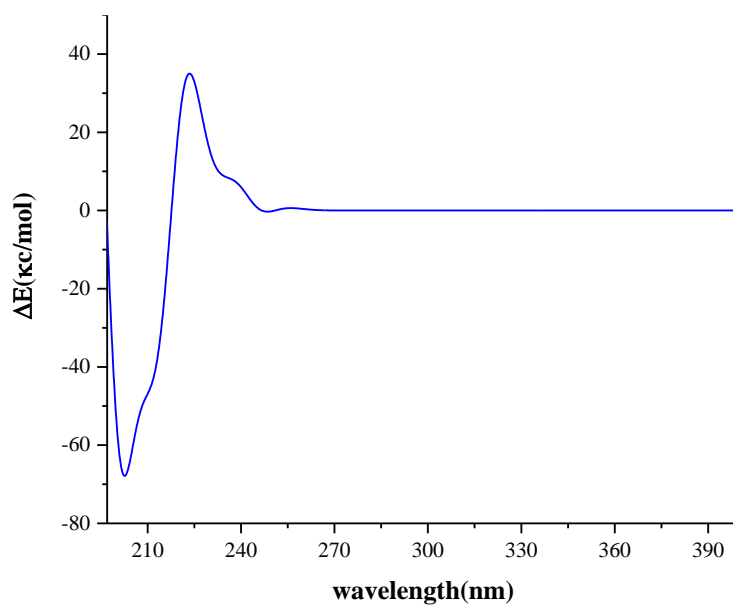

Figure S6. Experimentally tested ECD spectrum of chiral product 3g ( $1.0 \times 10^{-3}$  M) in  $\text{CH}_3\text{CN}$ .

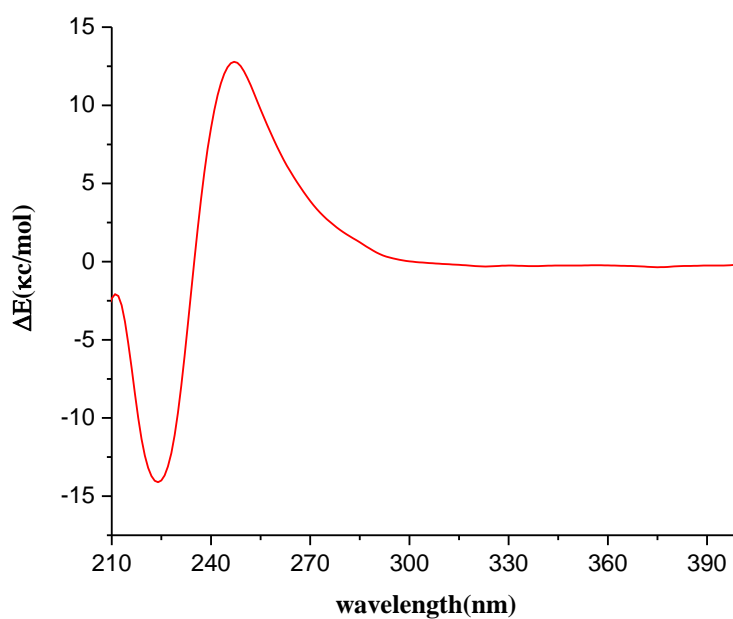

## 7. References

1. Zhen-Lei Song, et al. *Angew. Chem. Int. Ed.* **2019**, 58, 4695-4699.
2. Webster L. Santos, et al. *J. Org. Chem.* **2018**, 83, 17, 10436-10444
3. Eckert, Thomas, Ipaktschi, Junes, *Synthetic ommunications.* **1998**, 8, 327-335.
4. Yan-Hong He, et al. *Tetrahedron.* **2019**, 75, 130763
5. Li-Wen Xu, et al. *Org. Lett.* **2019**, 21, 4355–4358

## 8. $^1\text{H}$ NMR, $^{13}\text{C}$ NMR and $^{31}\text{P}$ NMR Spectra

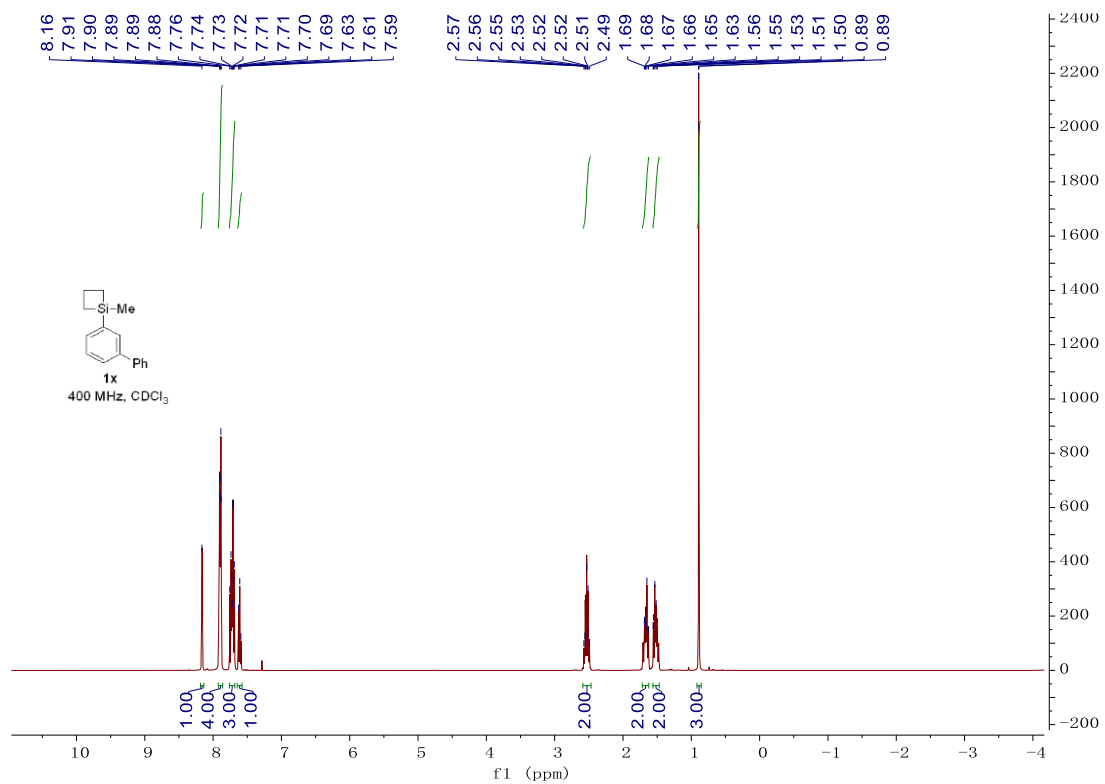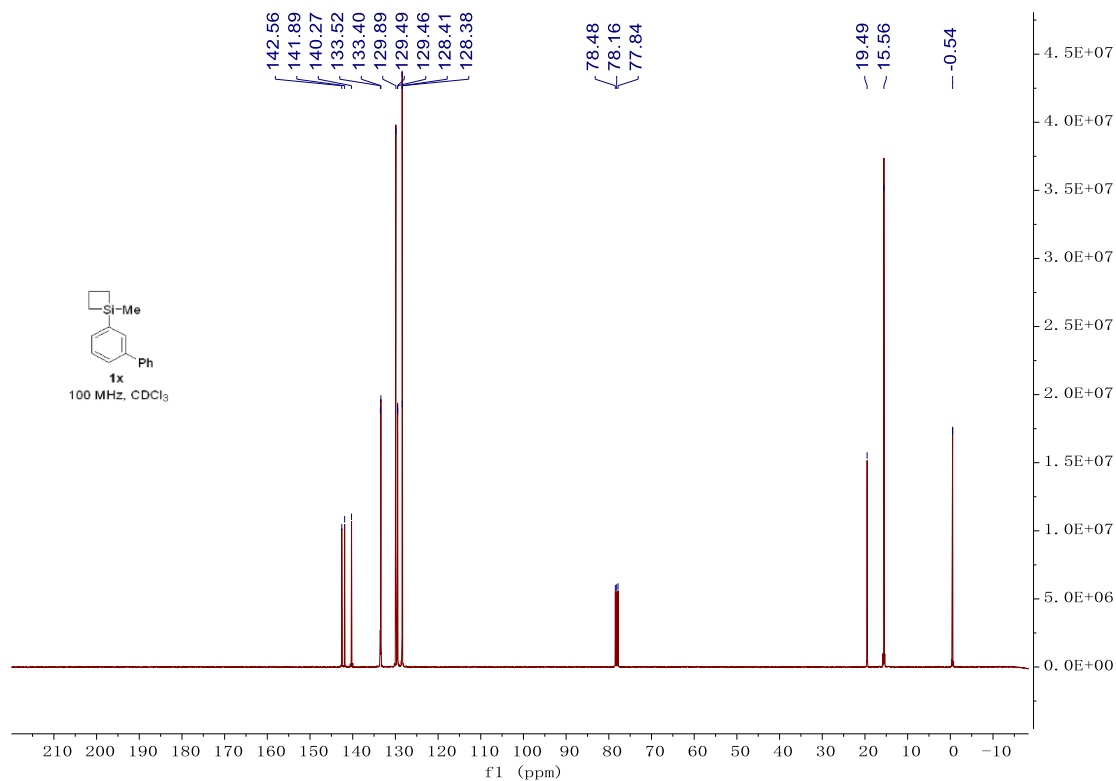

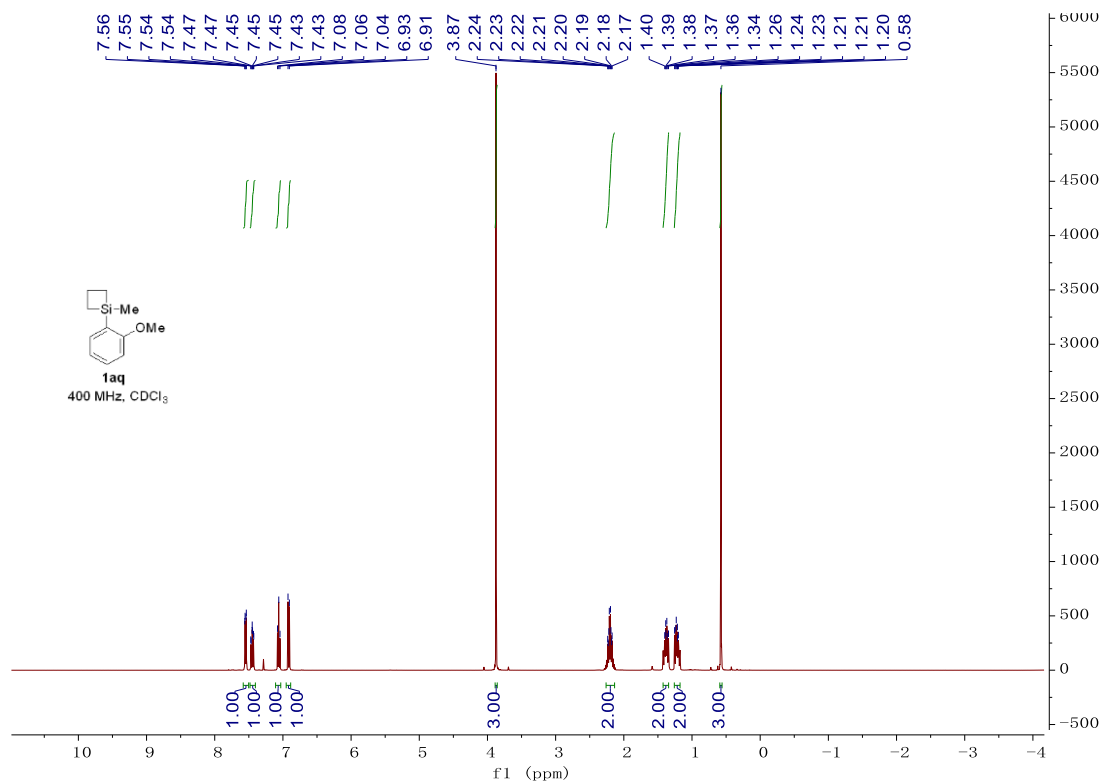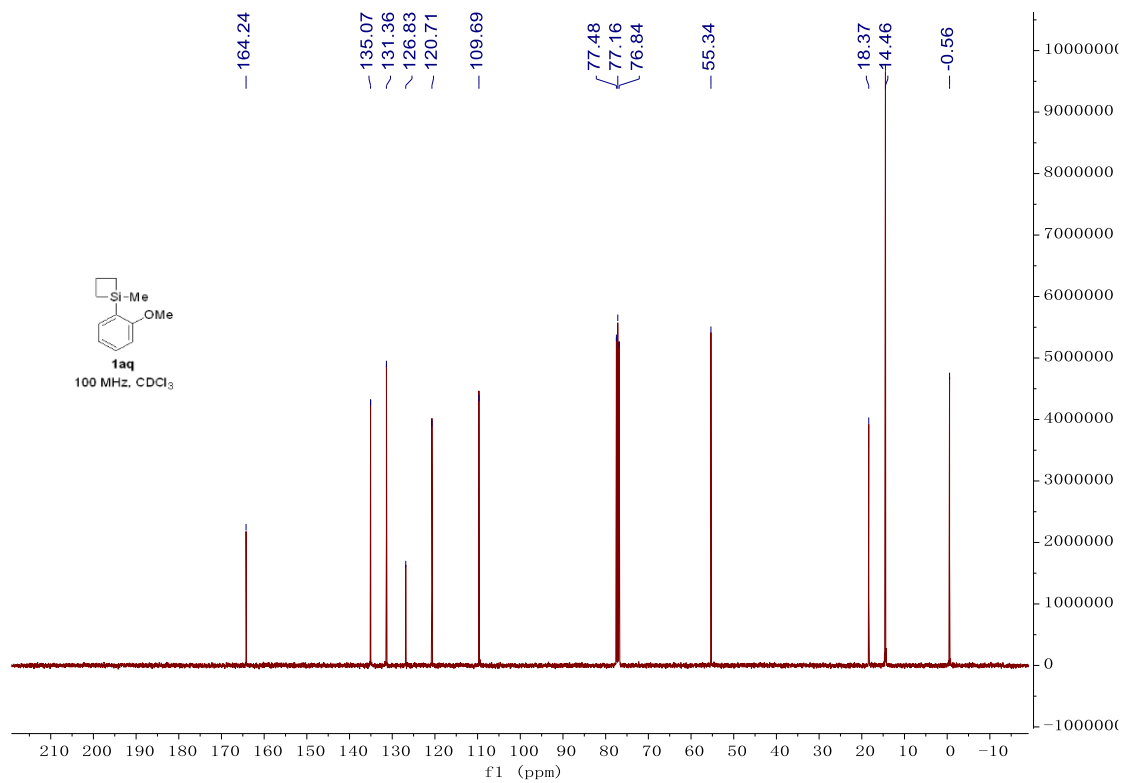

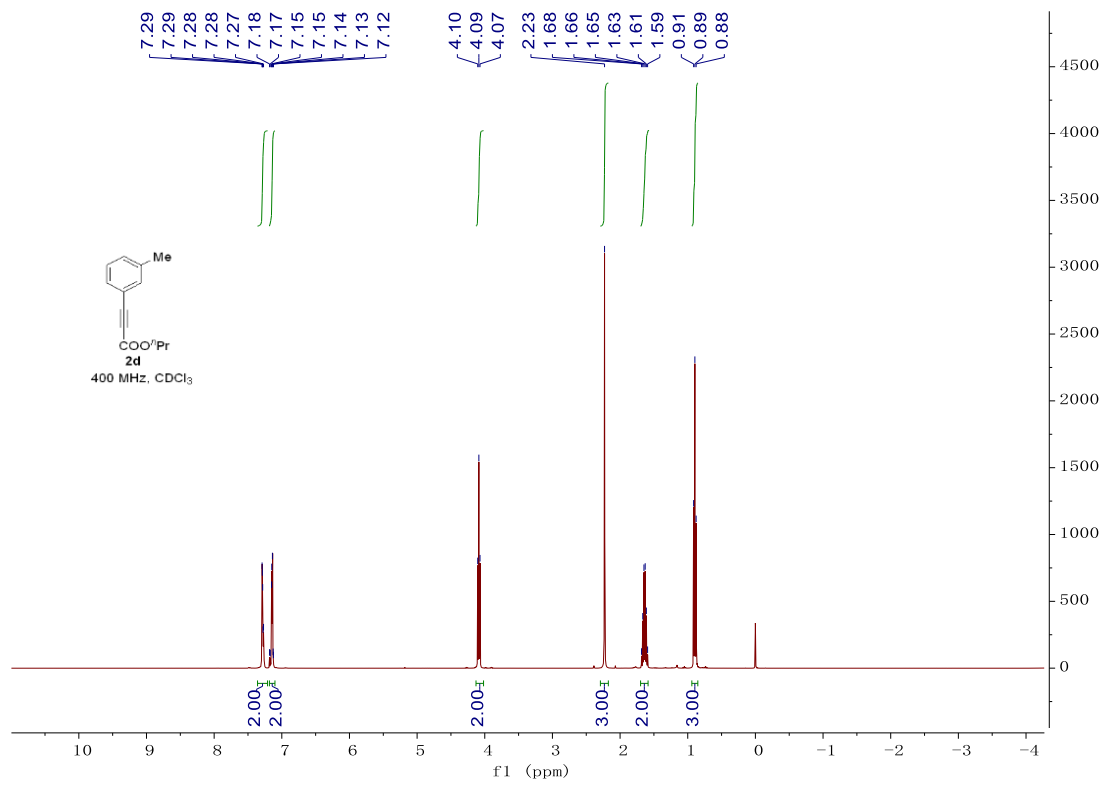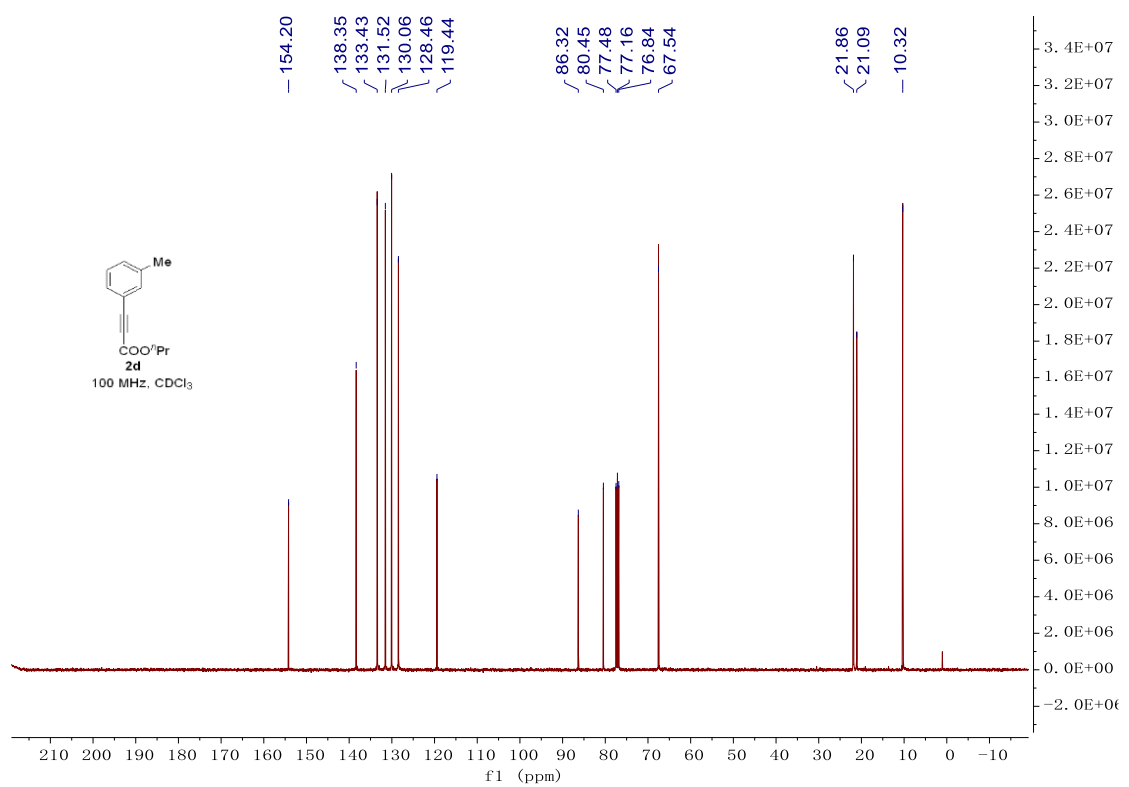

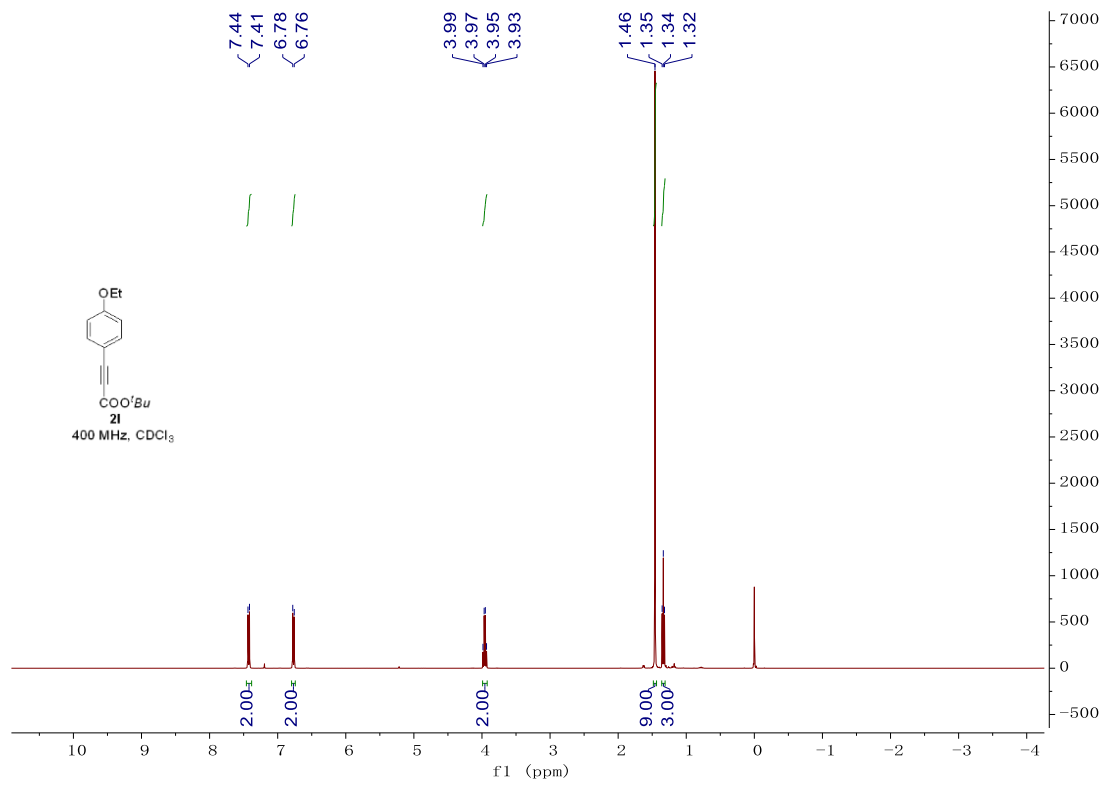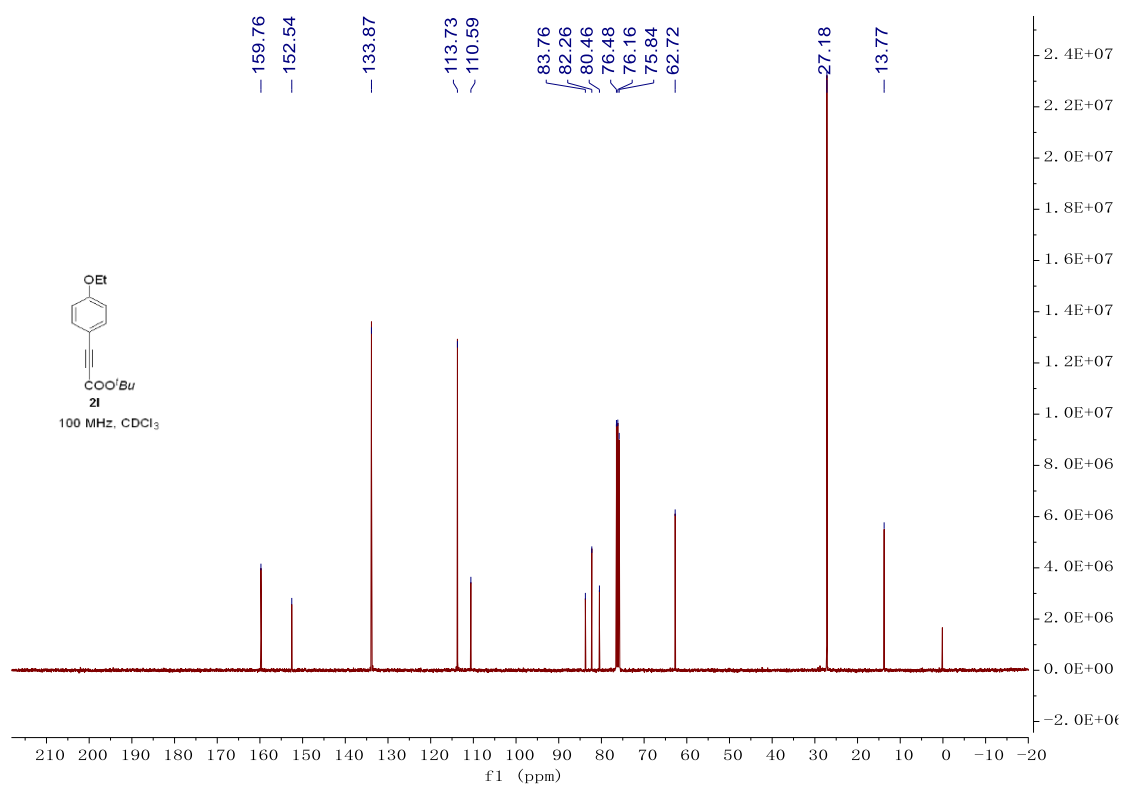

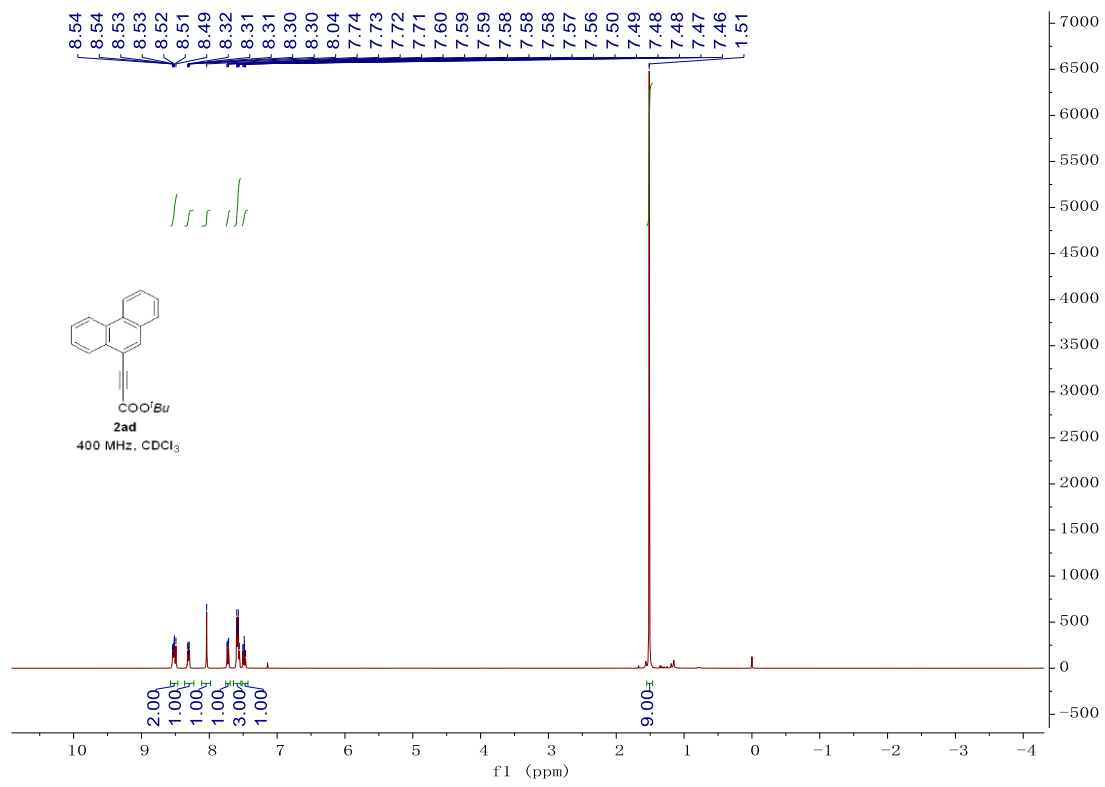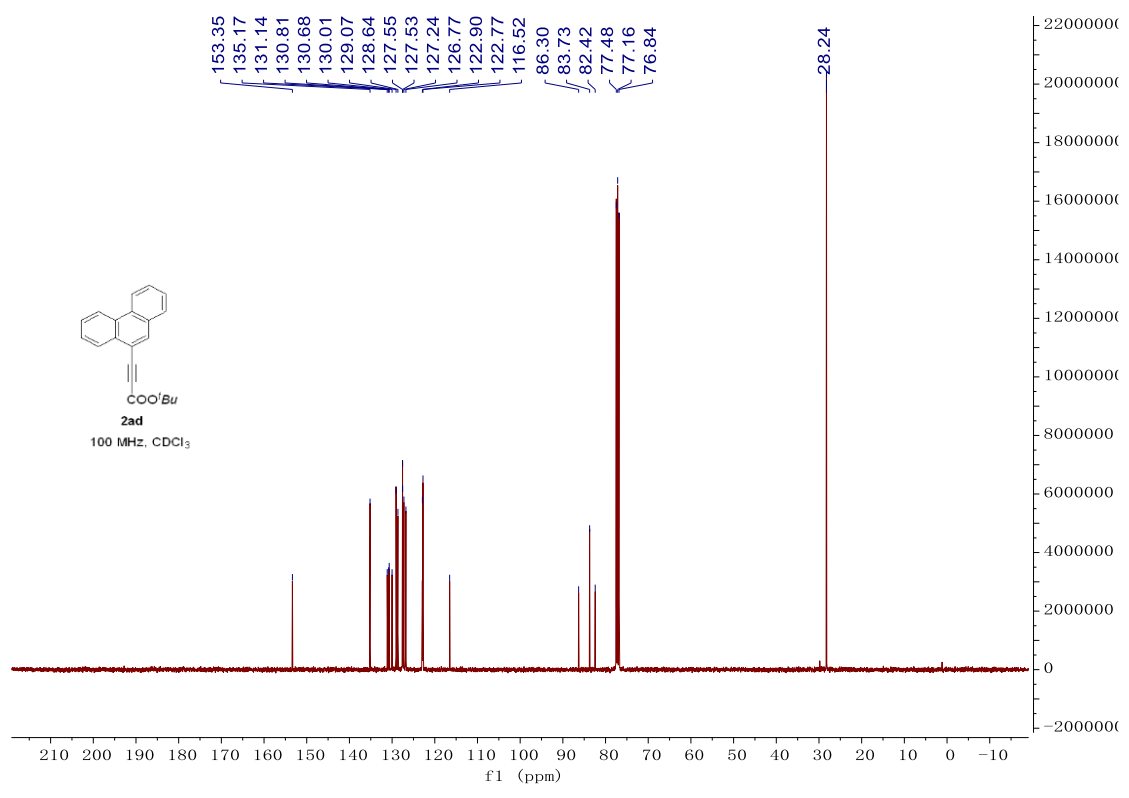



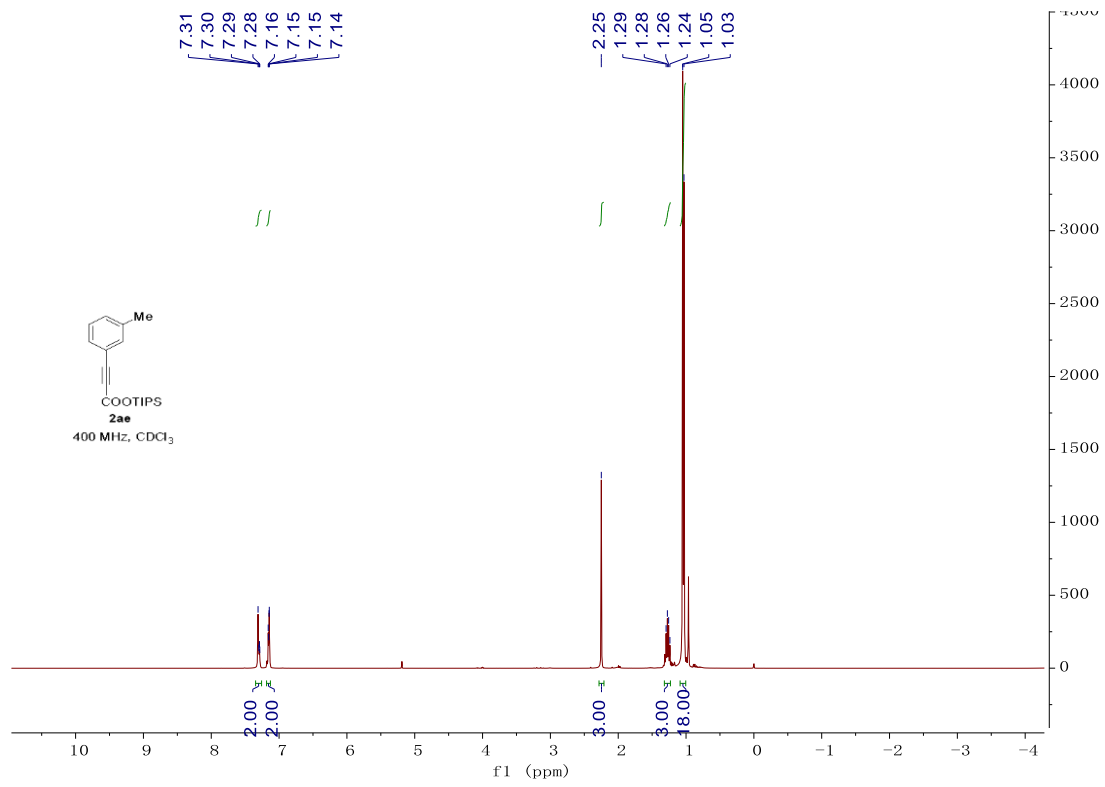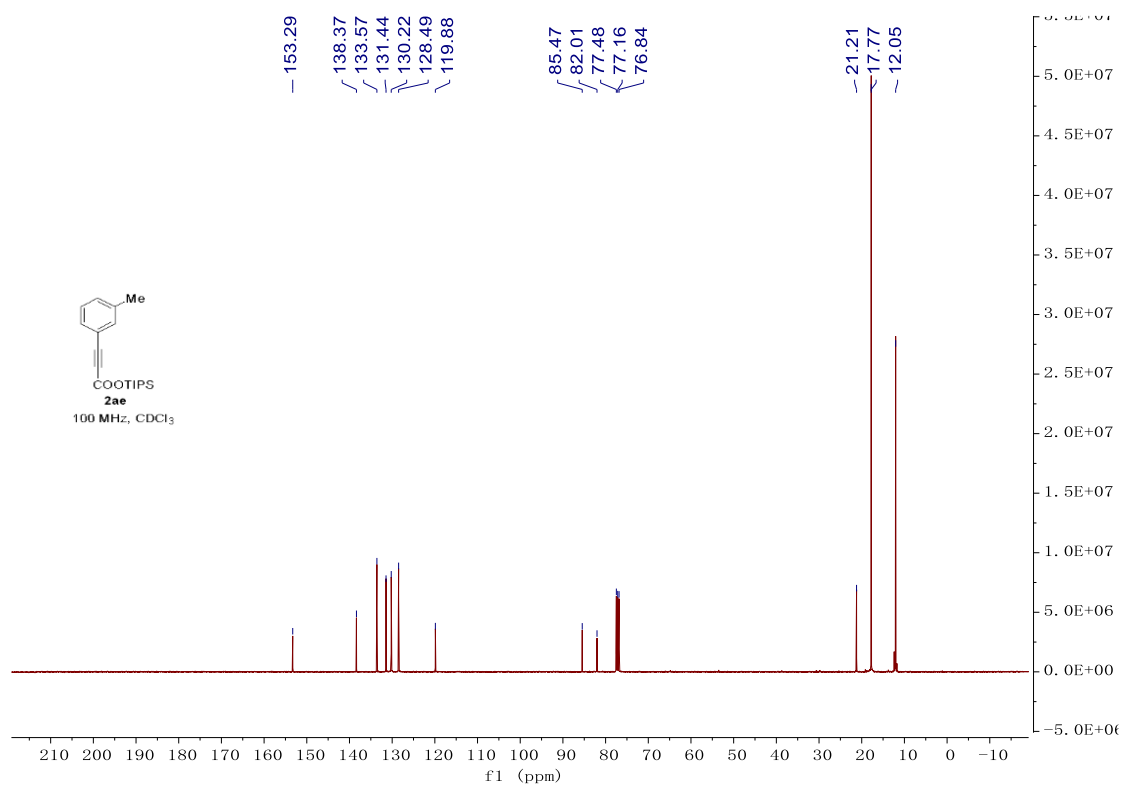

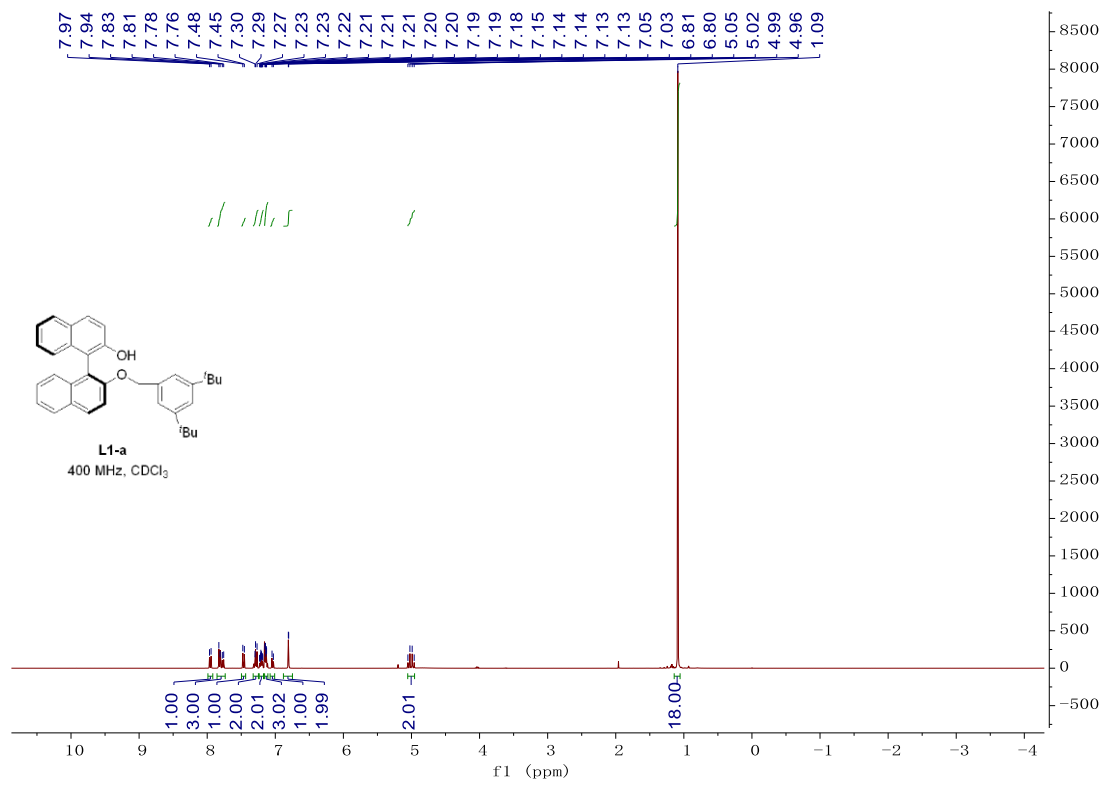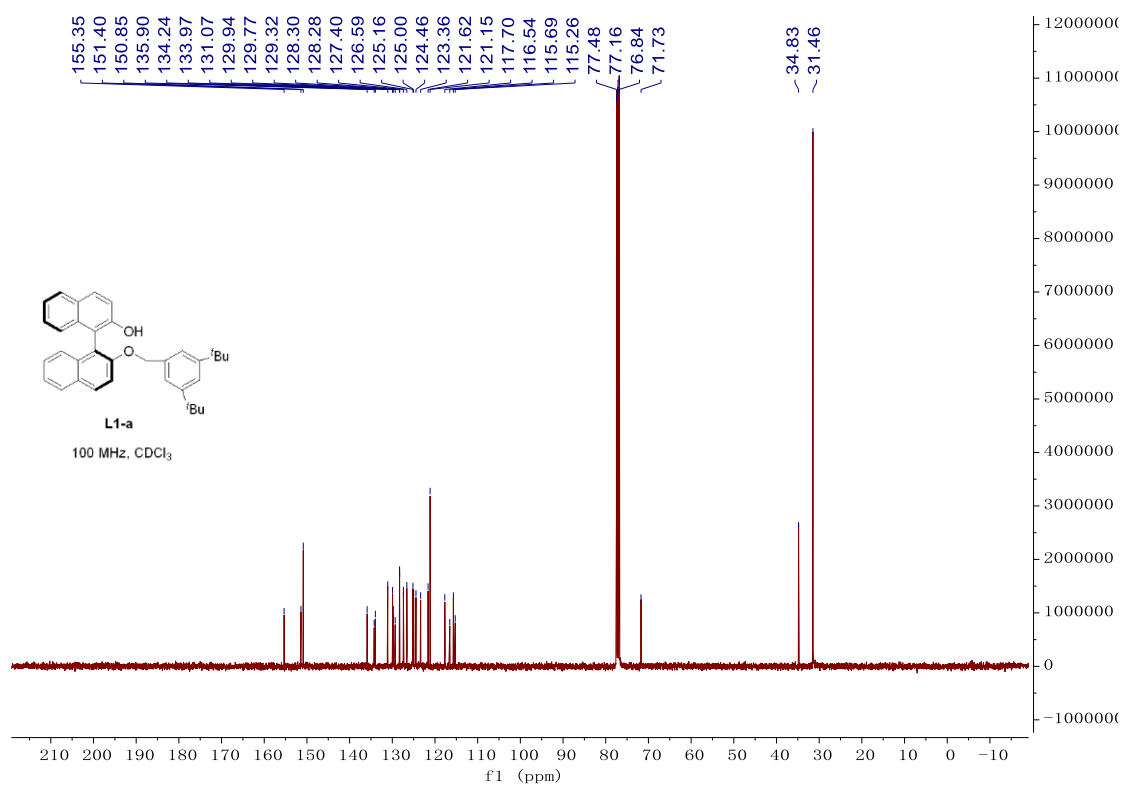

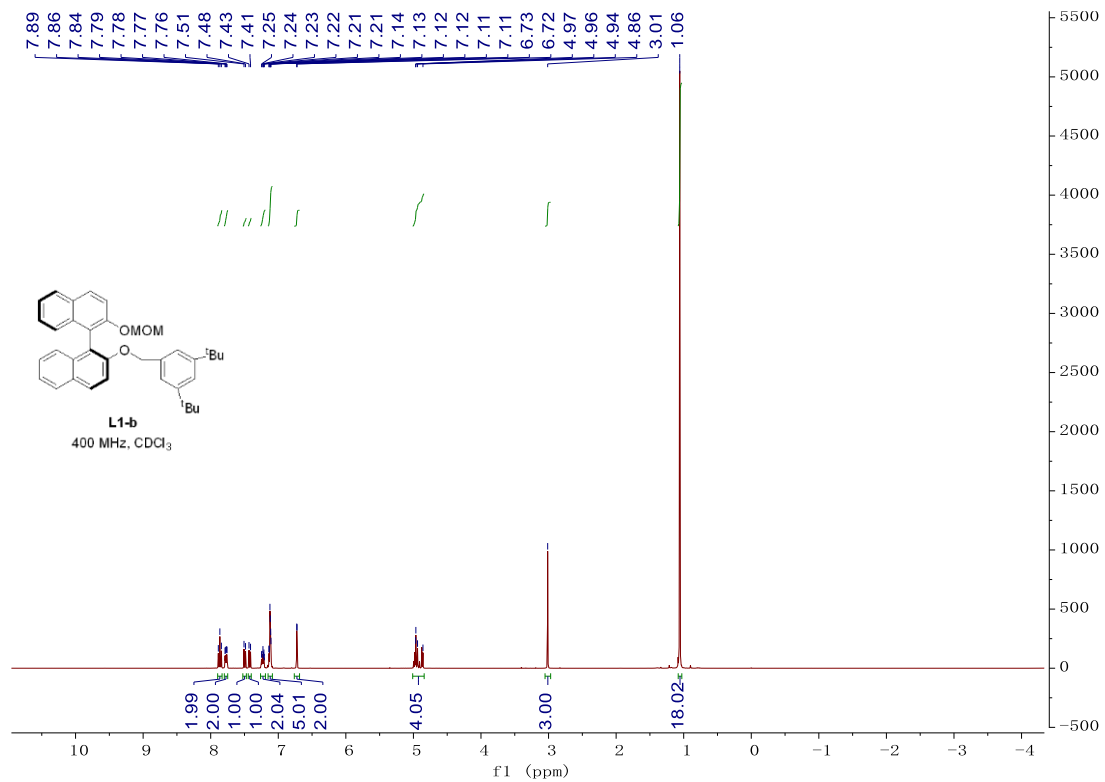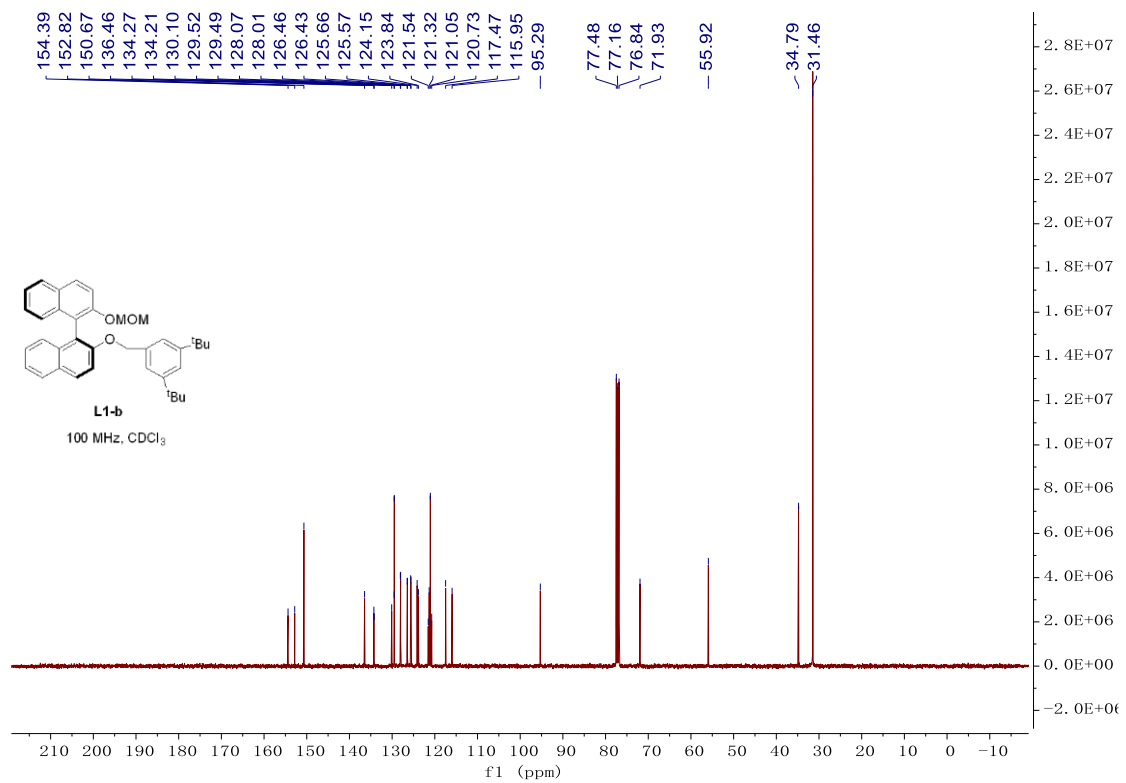

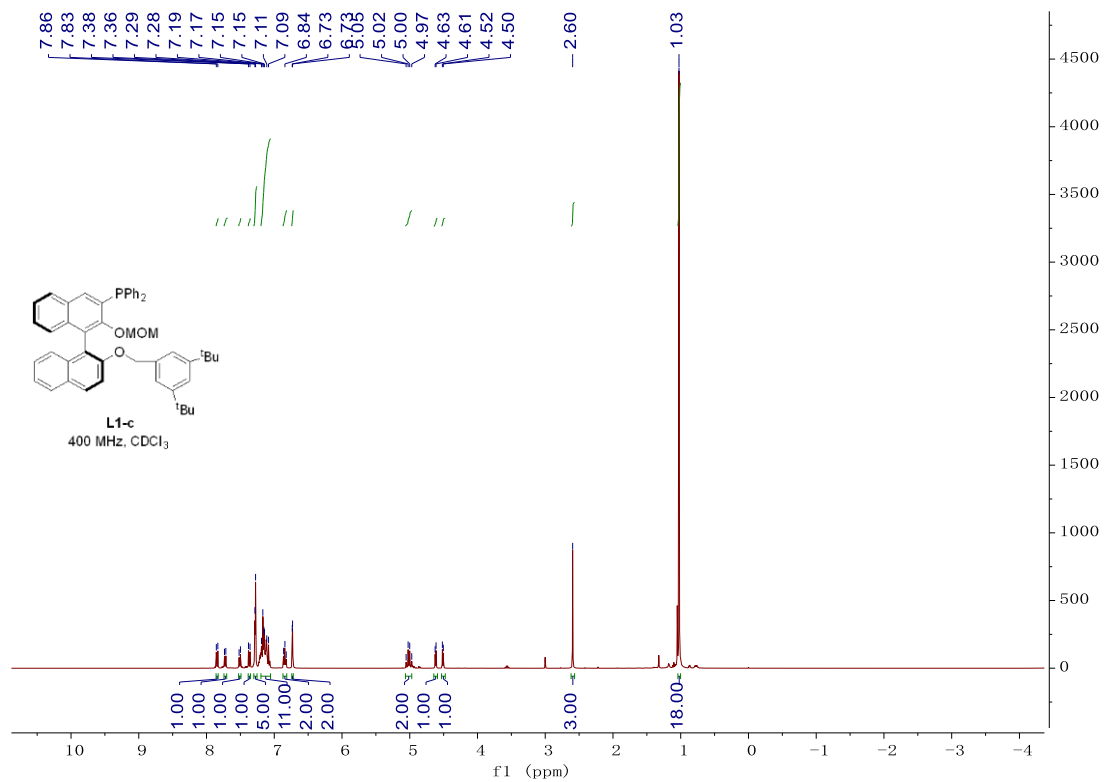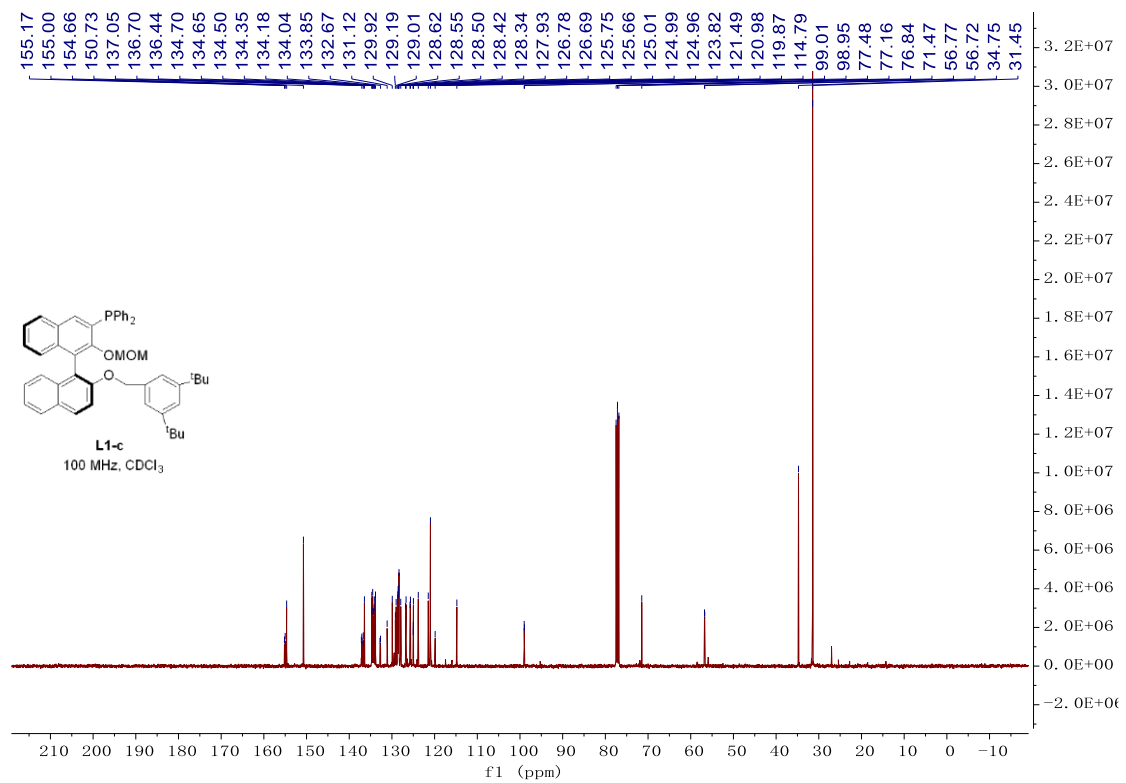

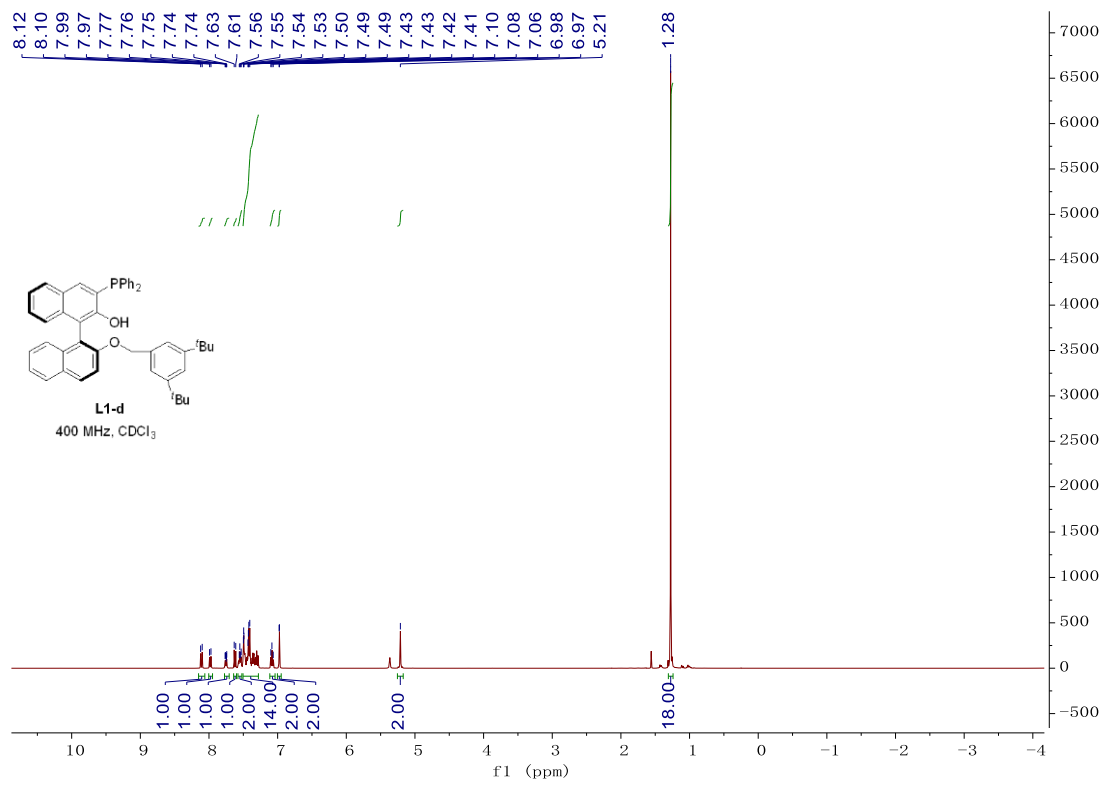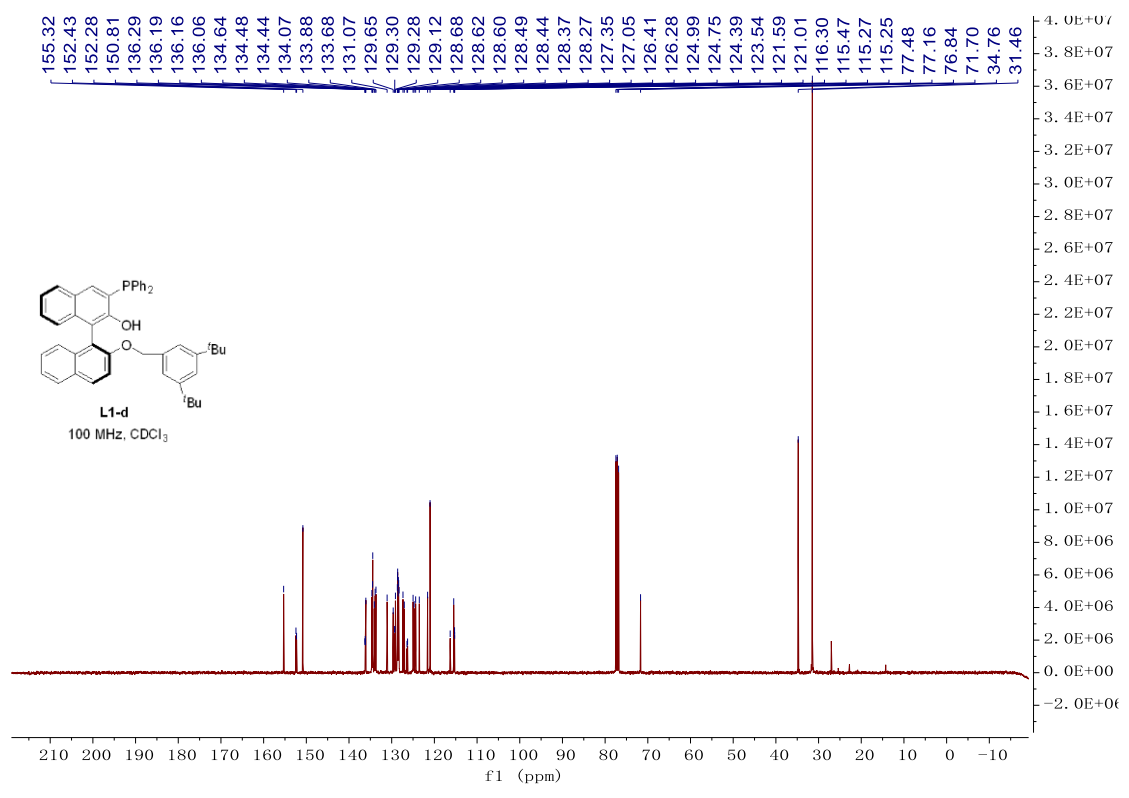



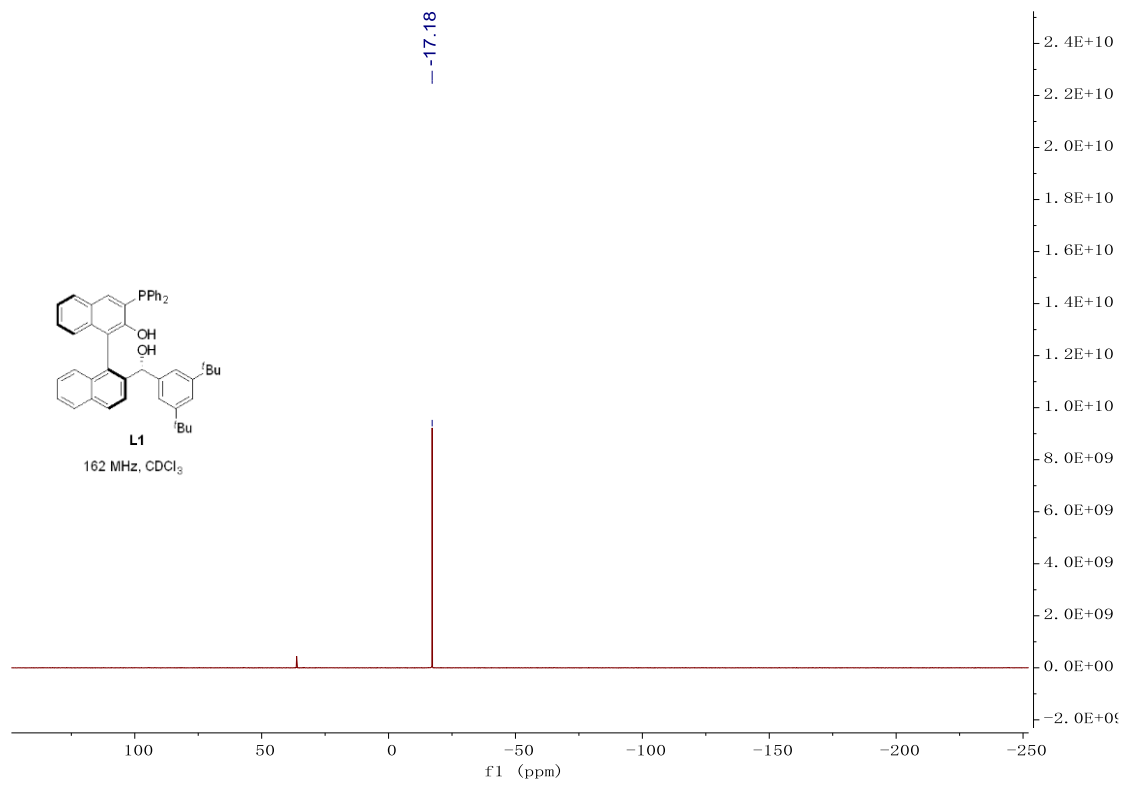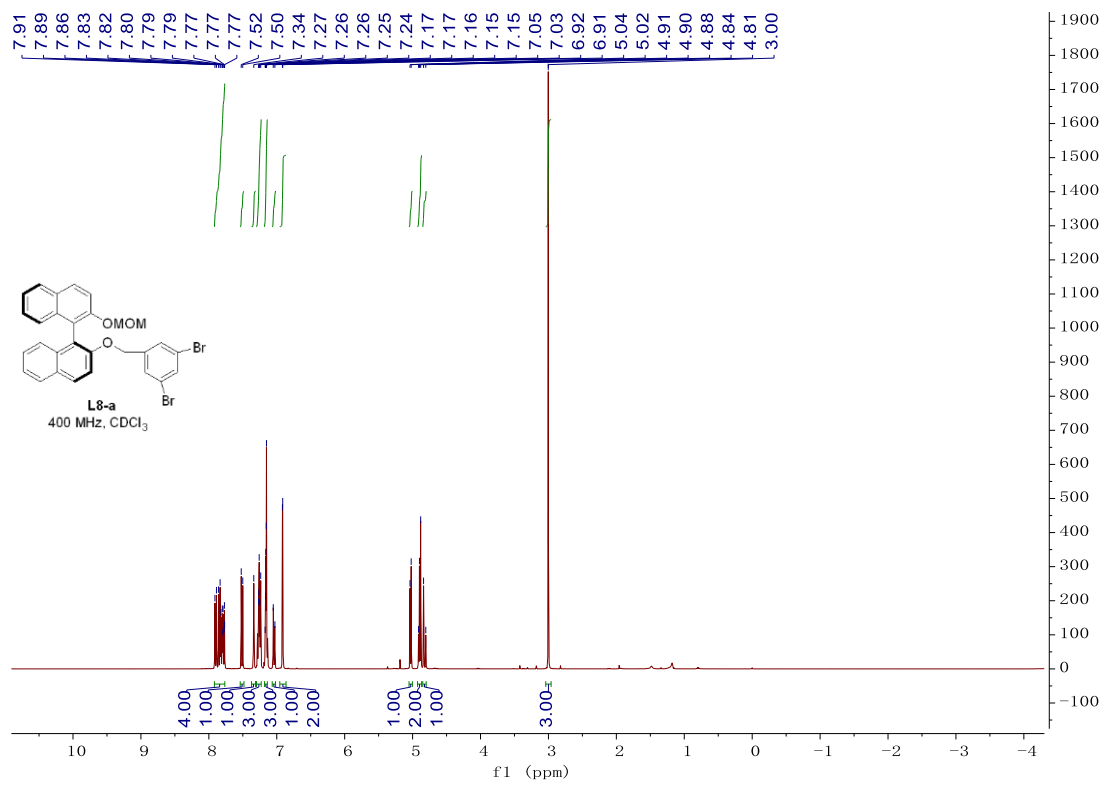

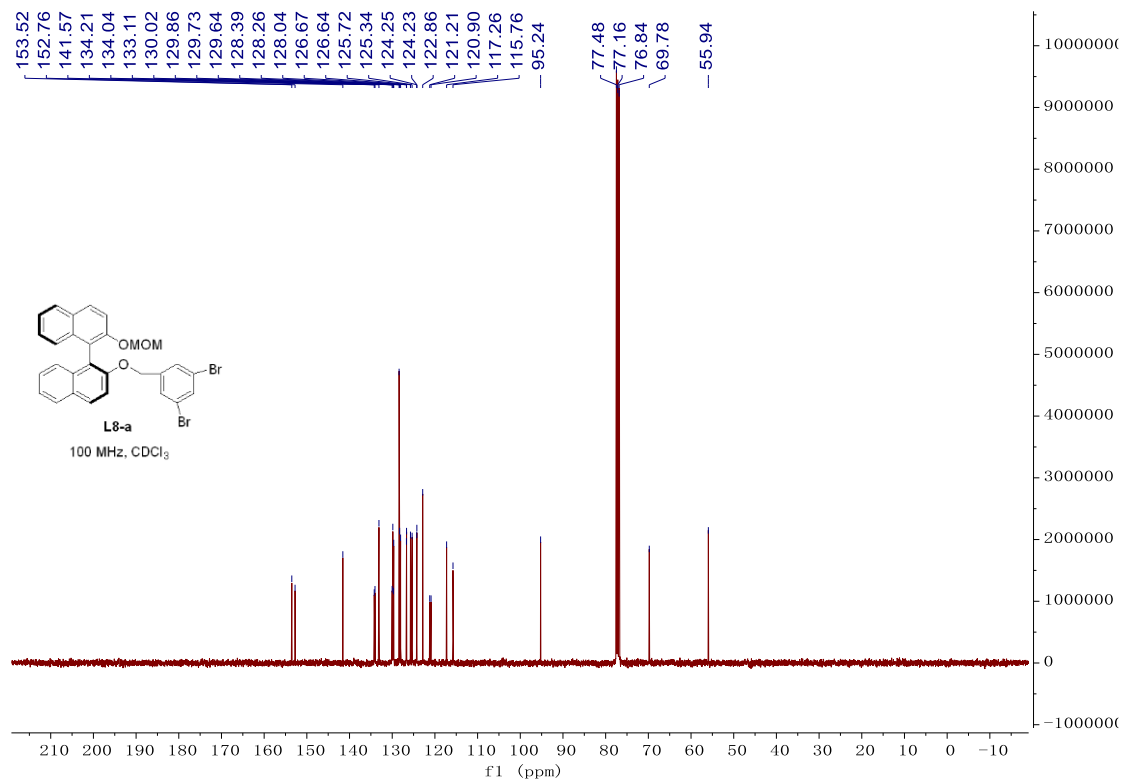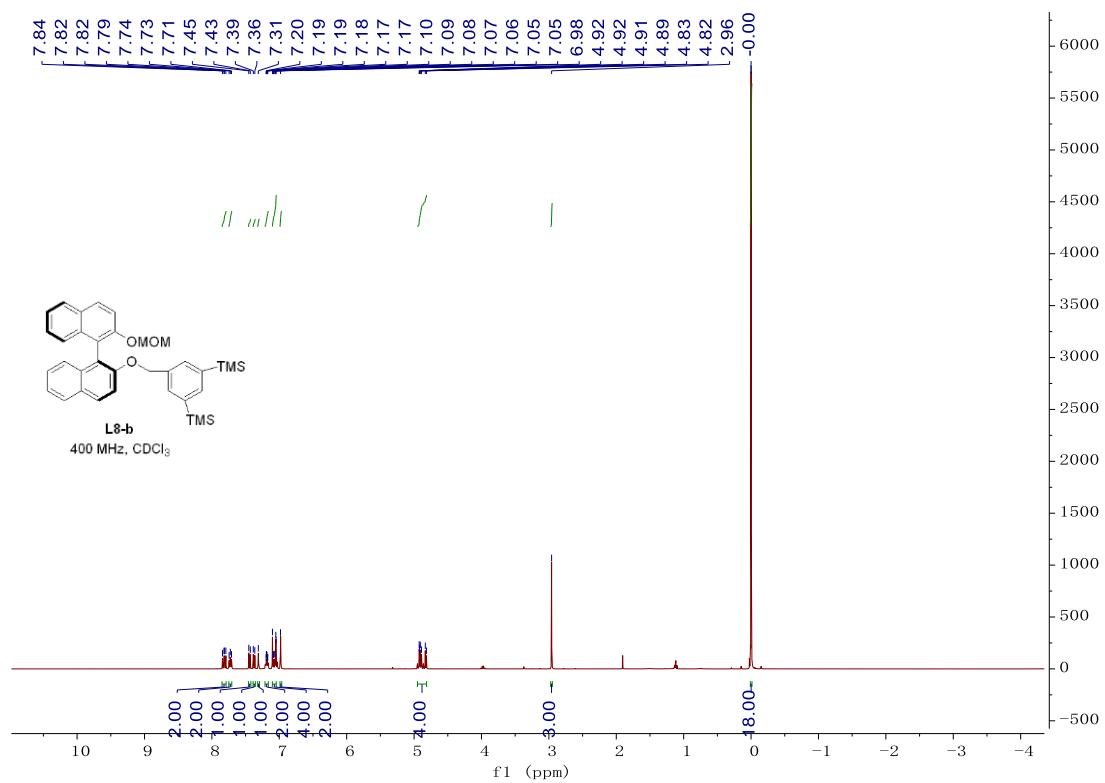



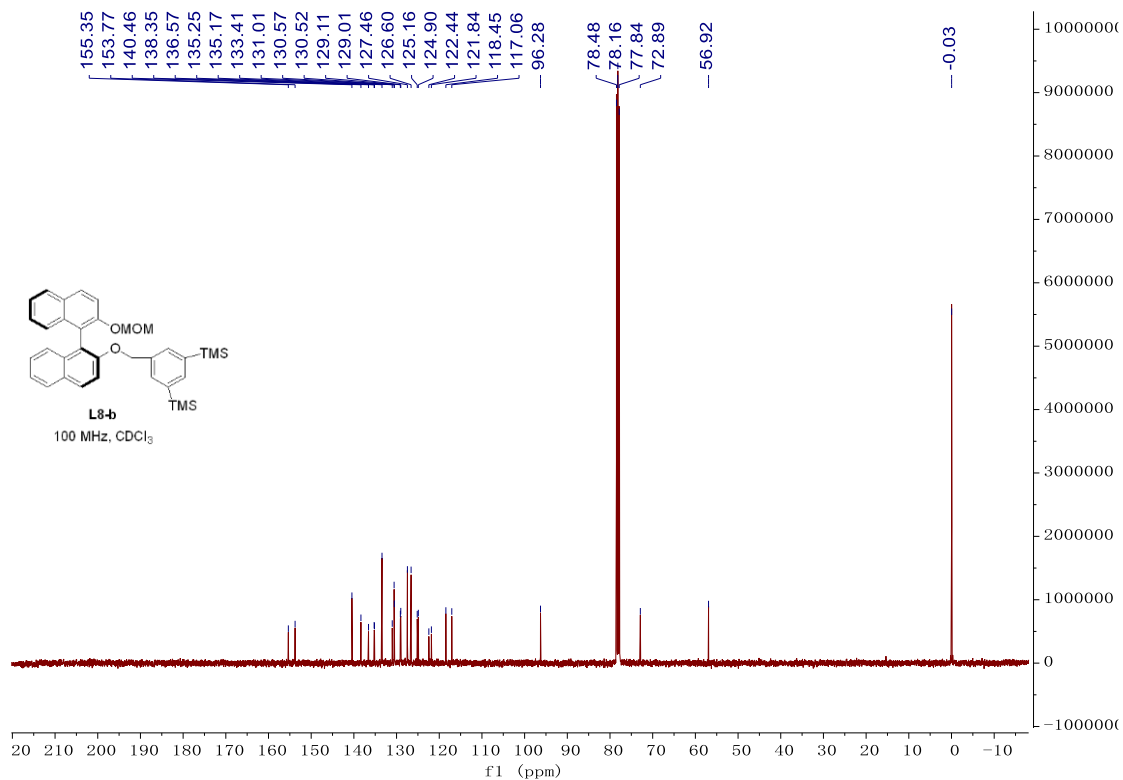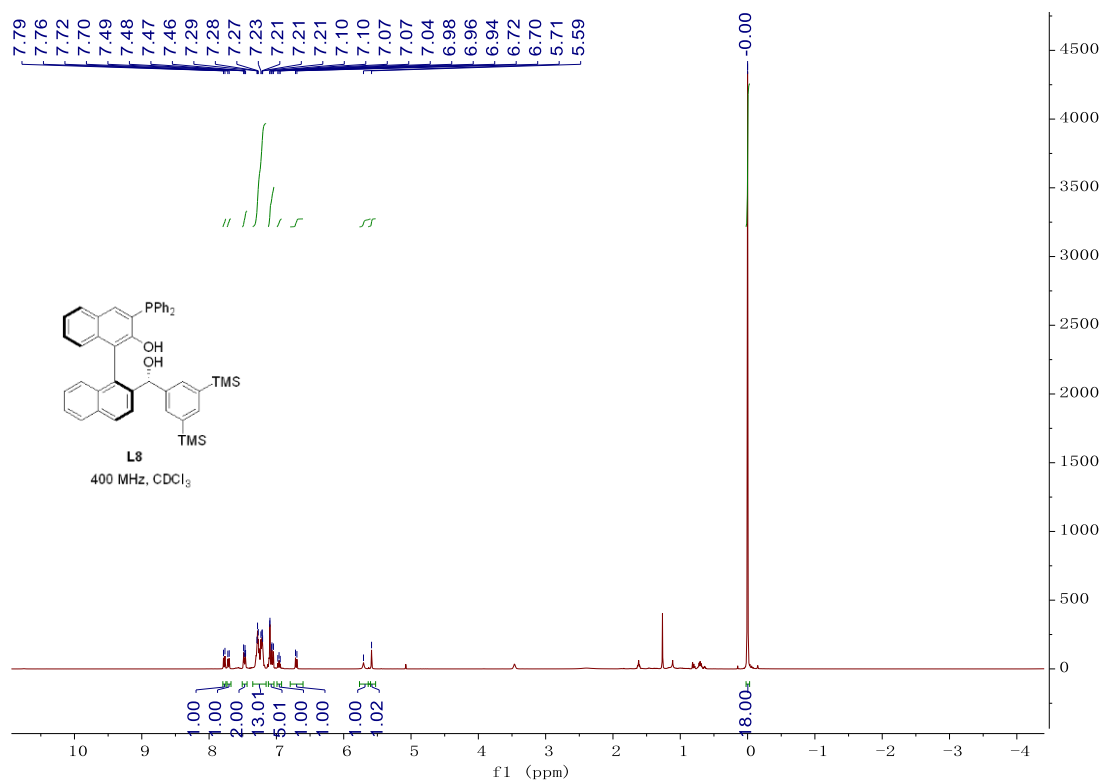

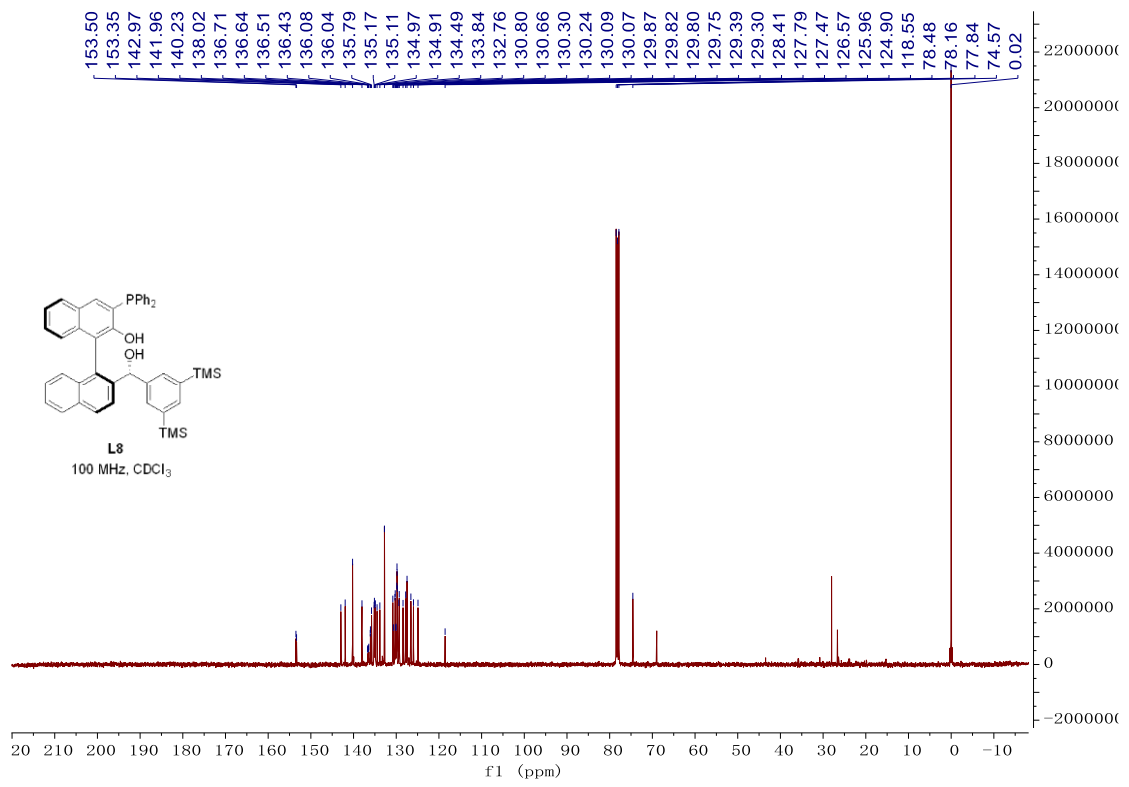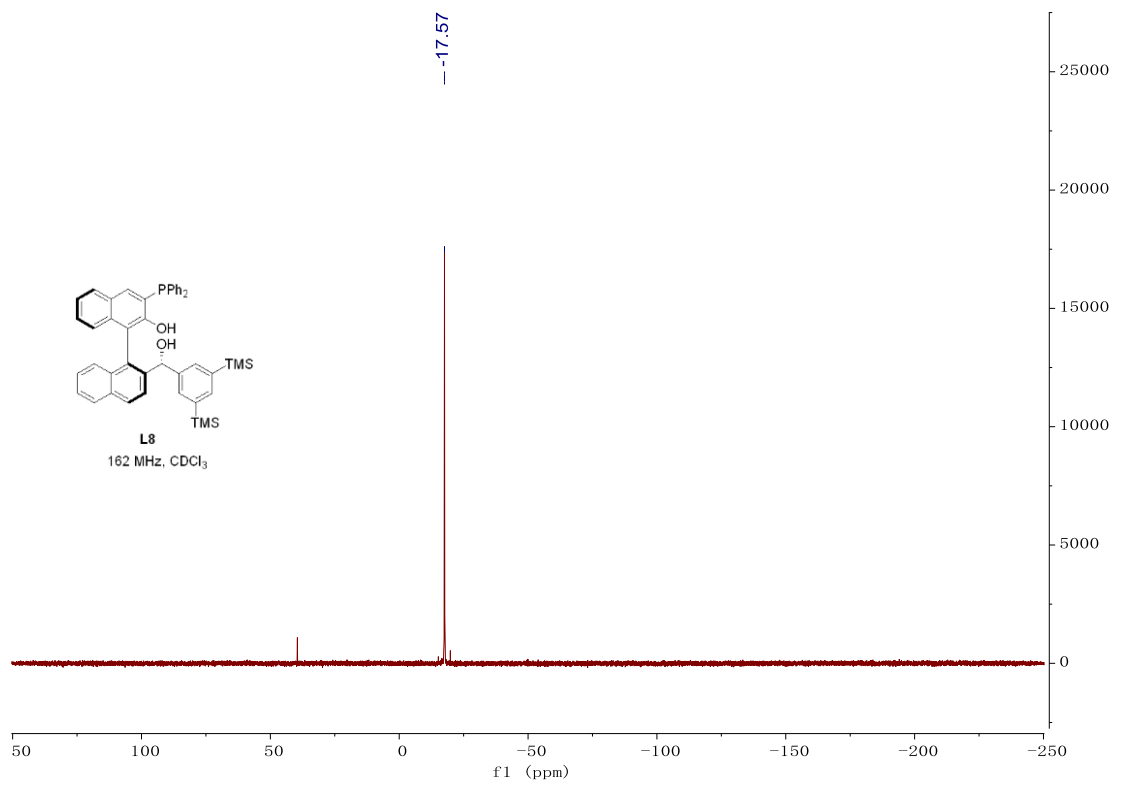

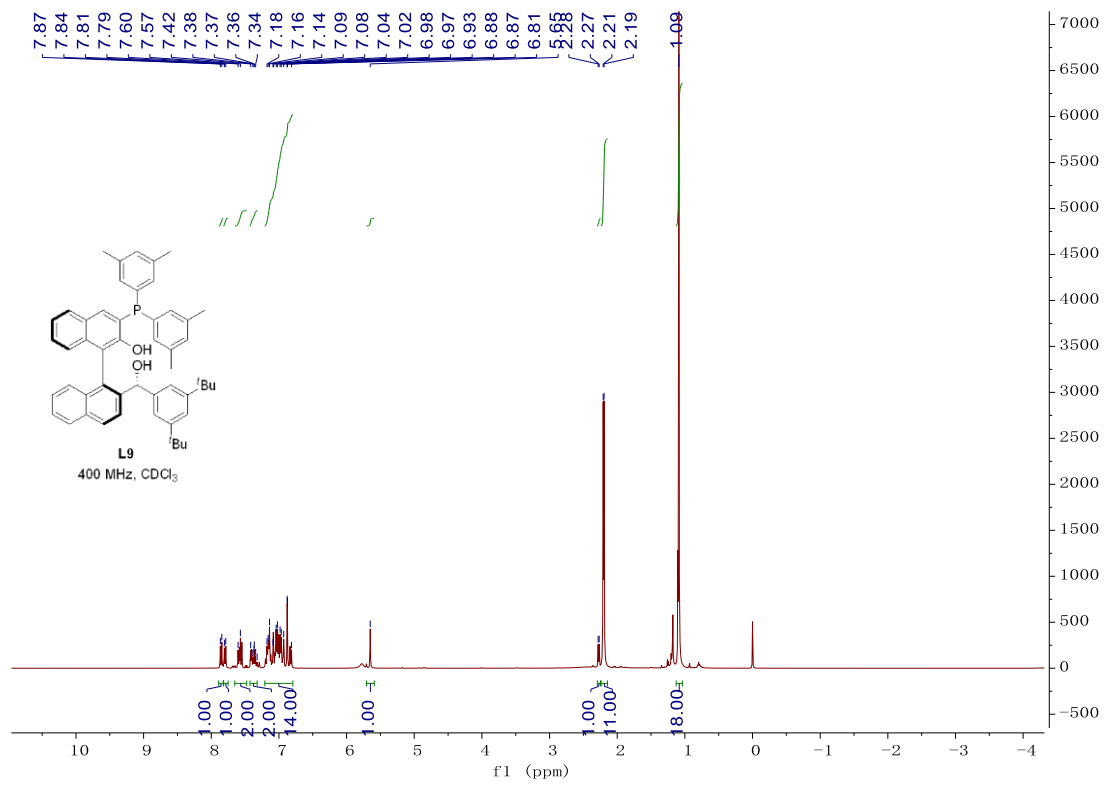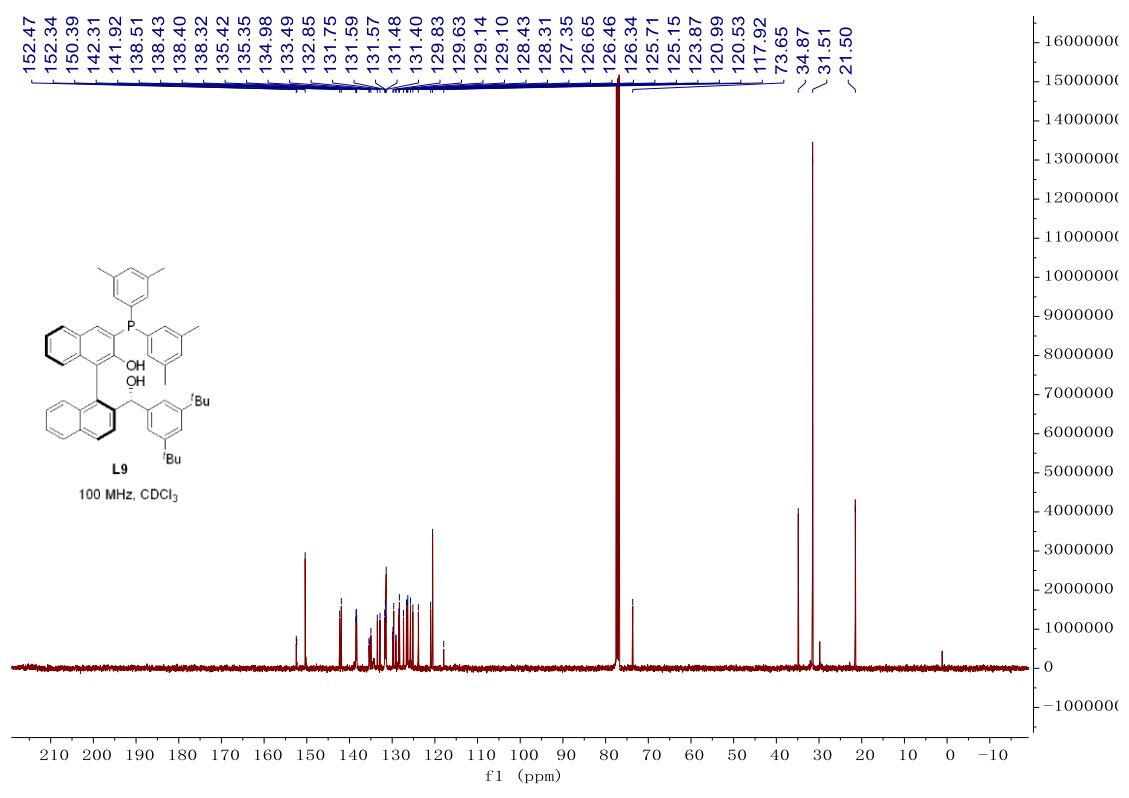

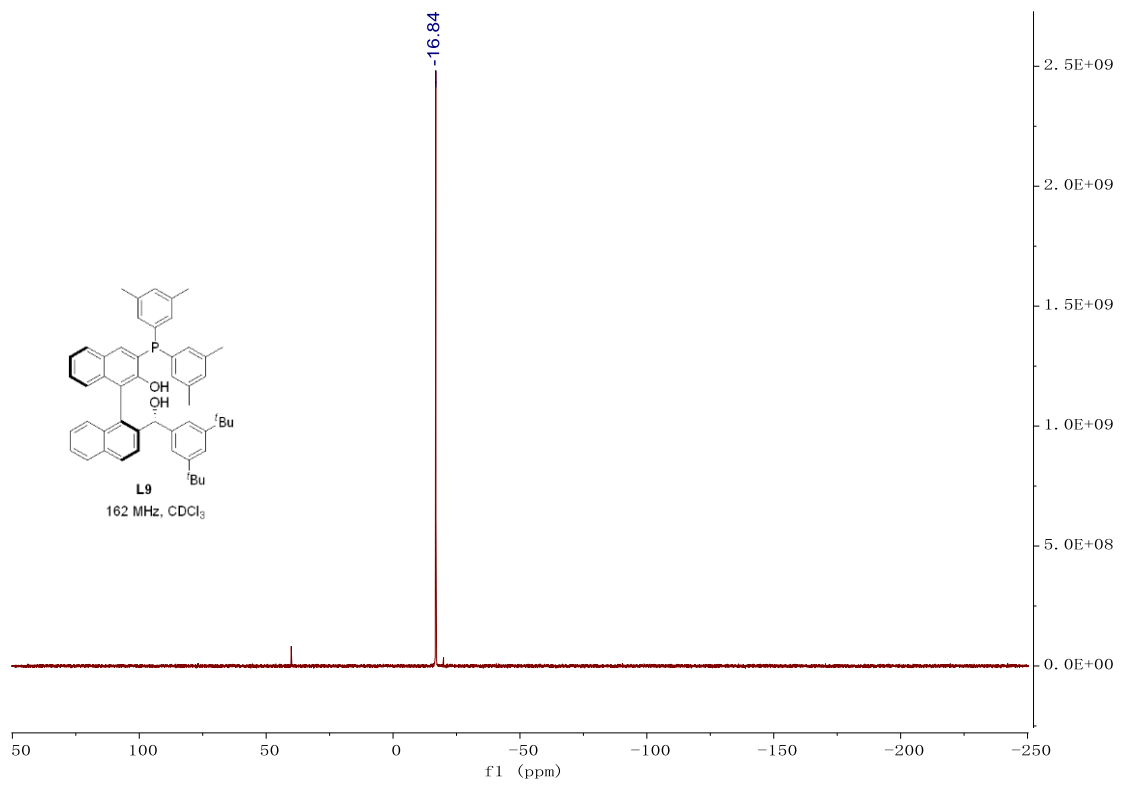

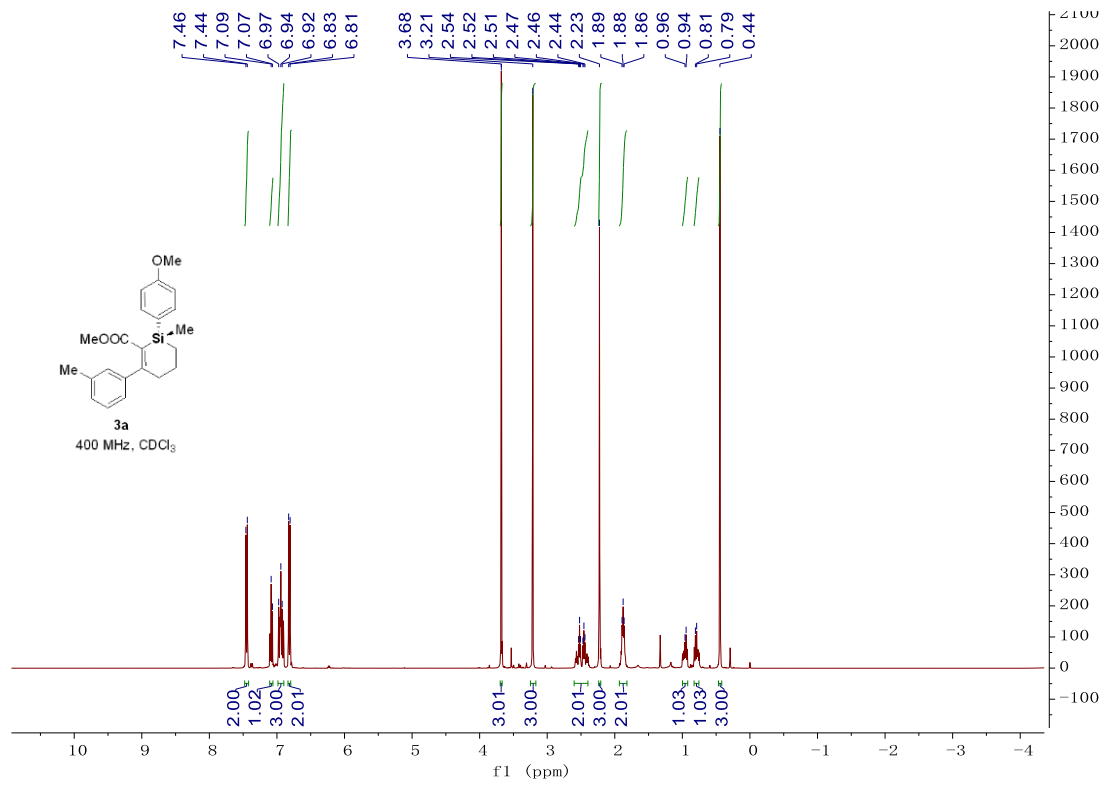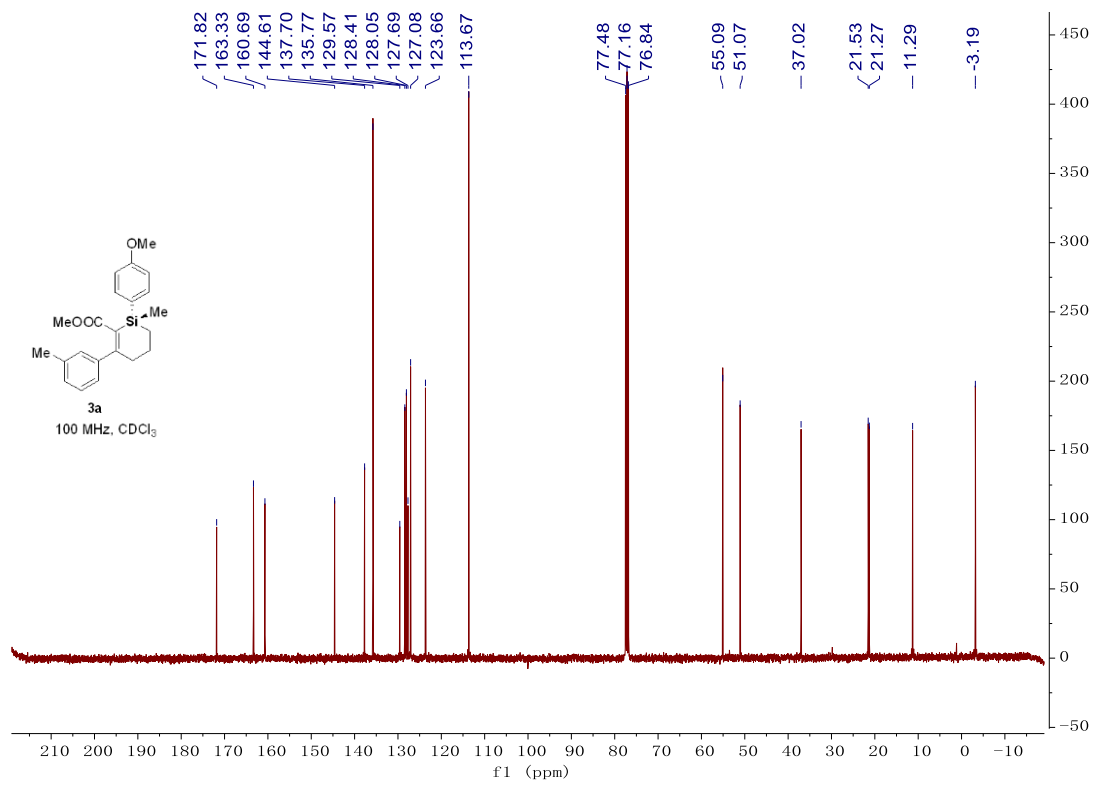

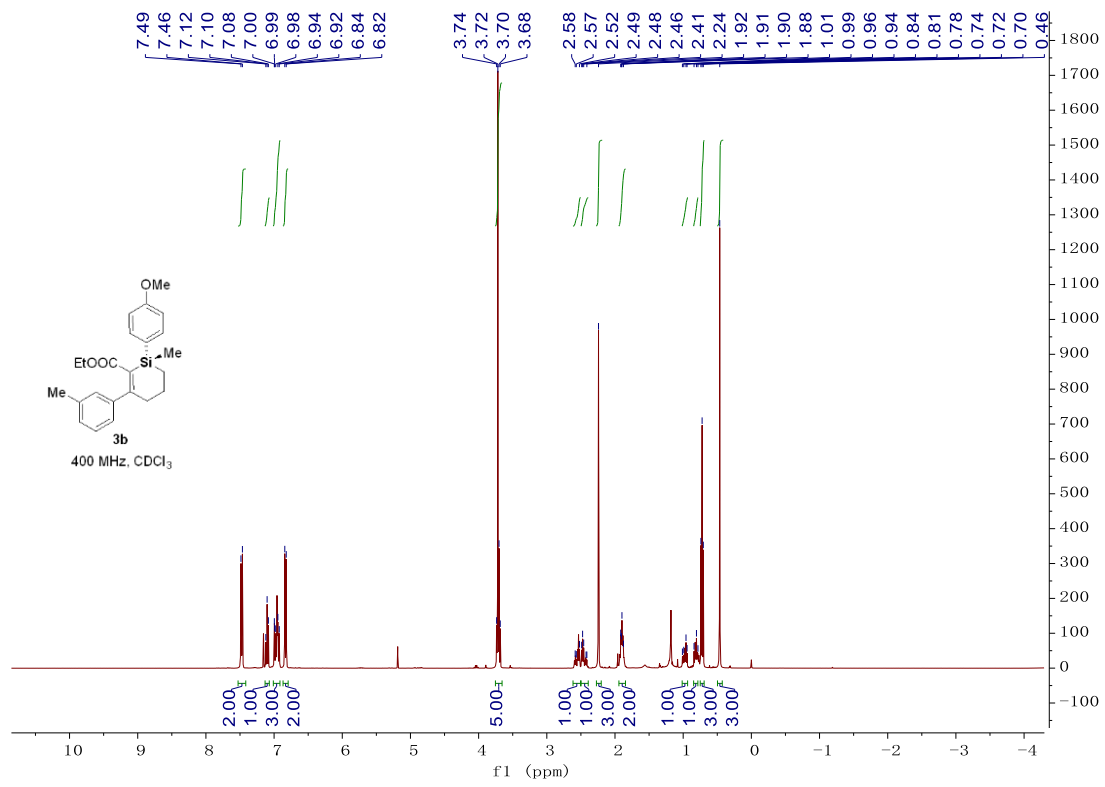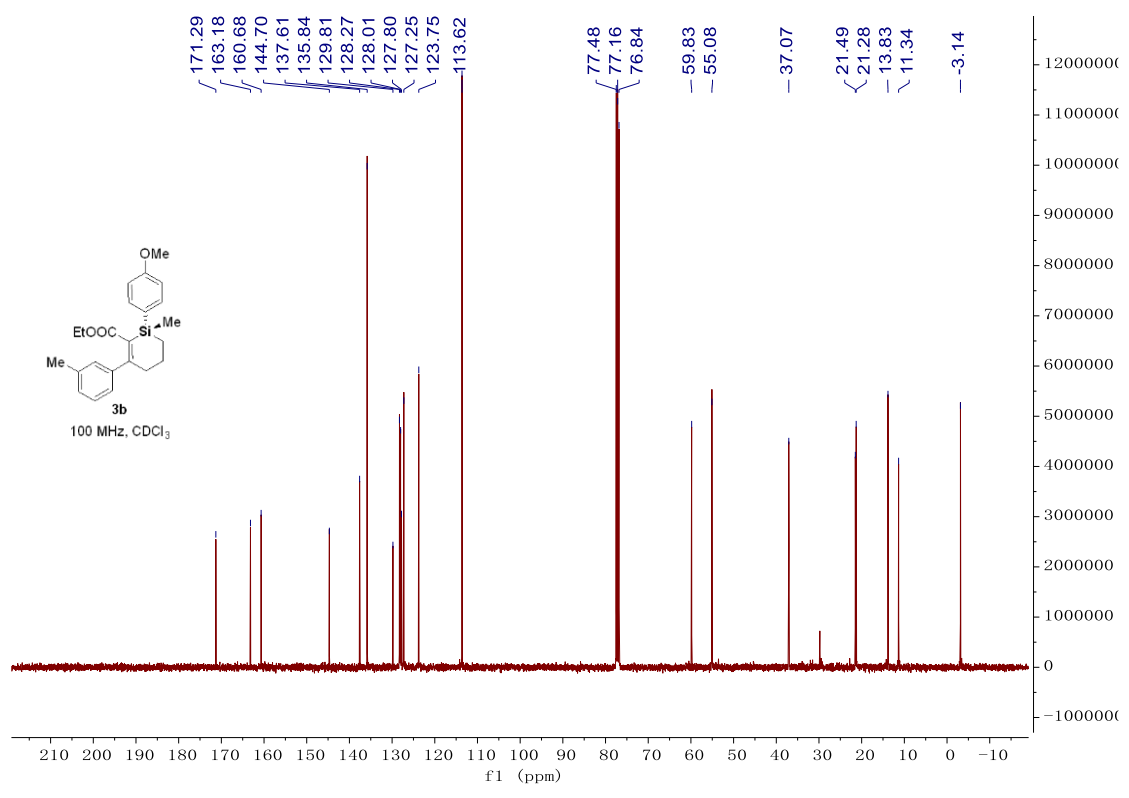

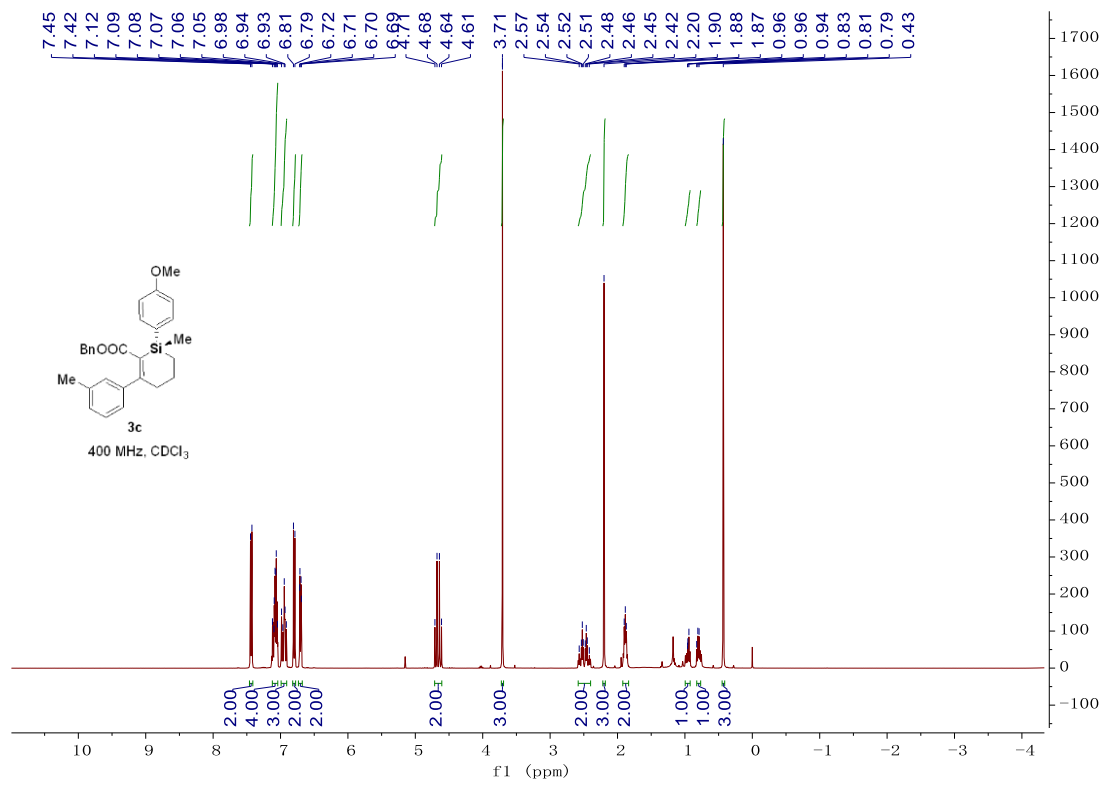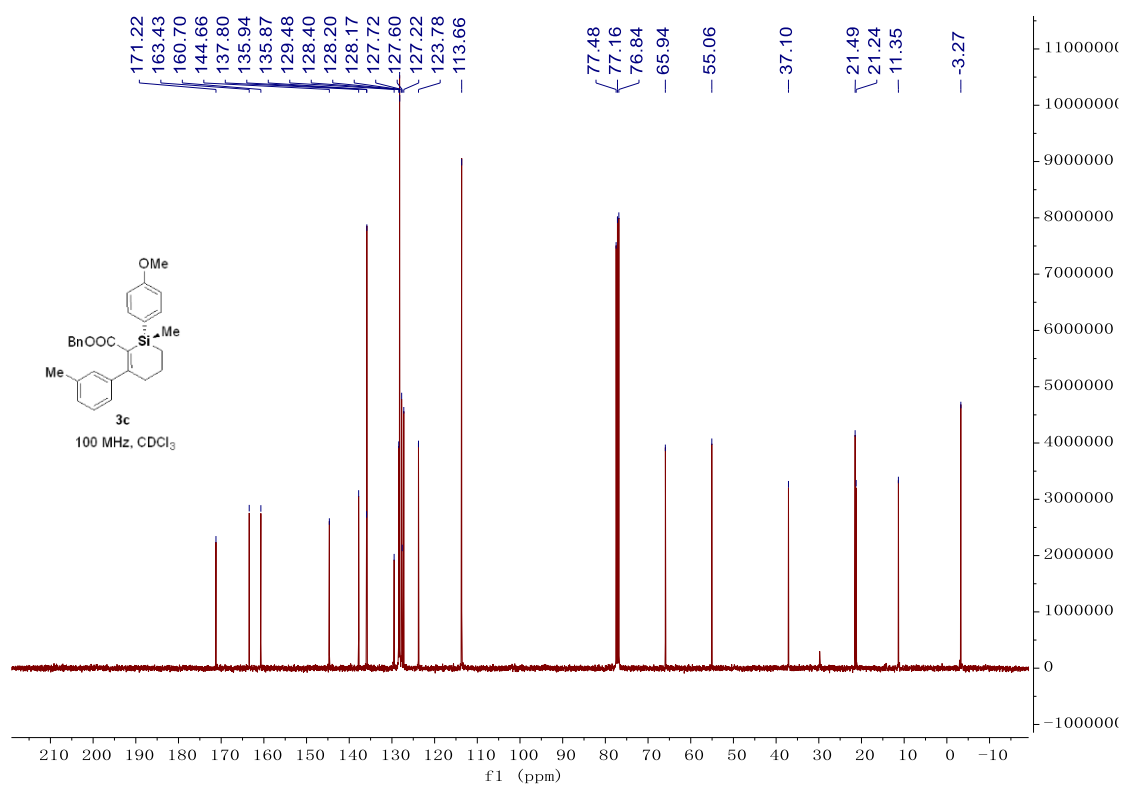

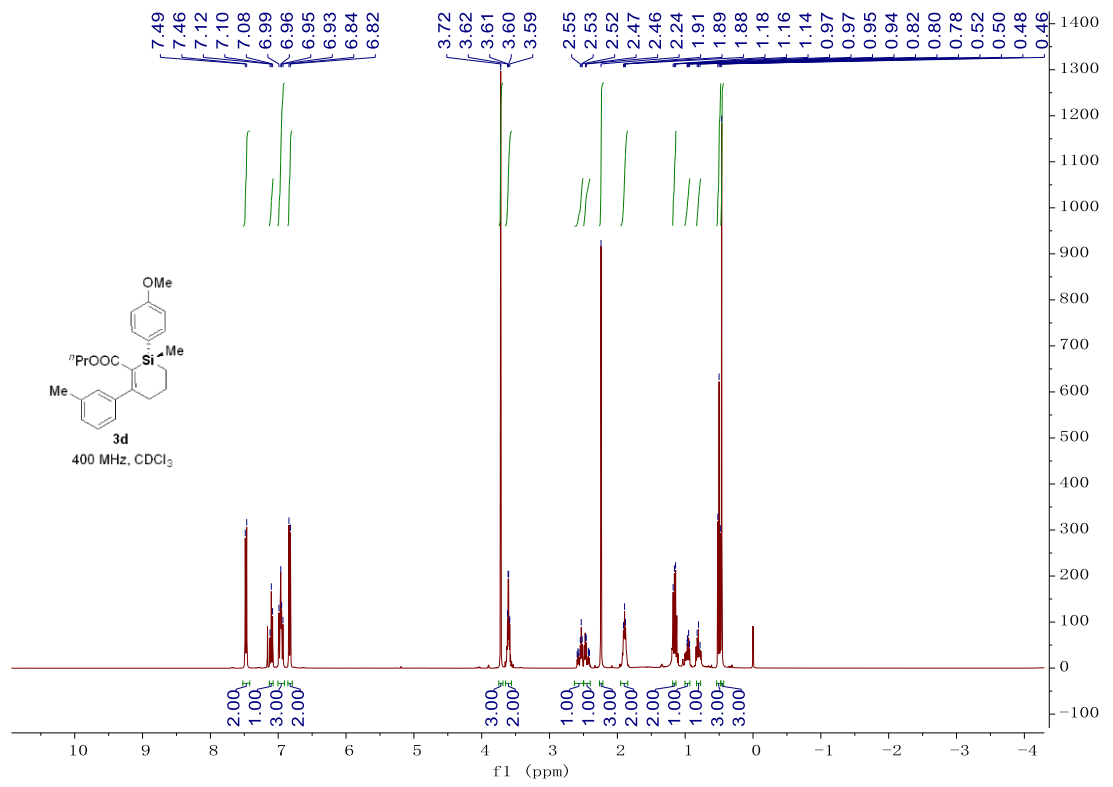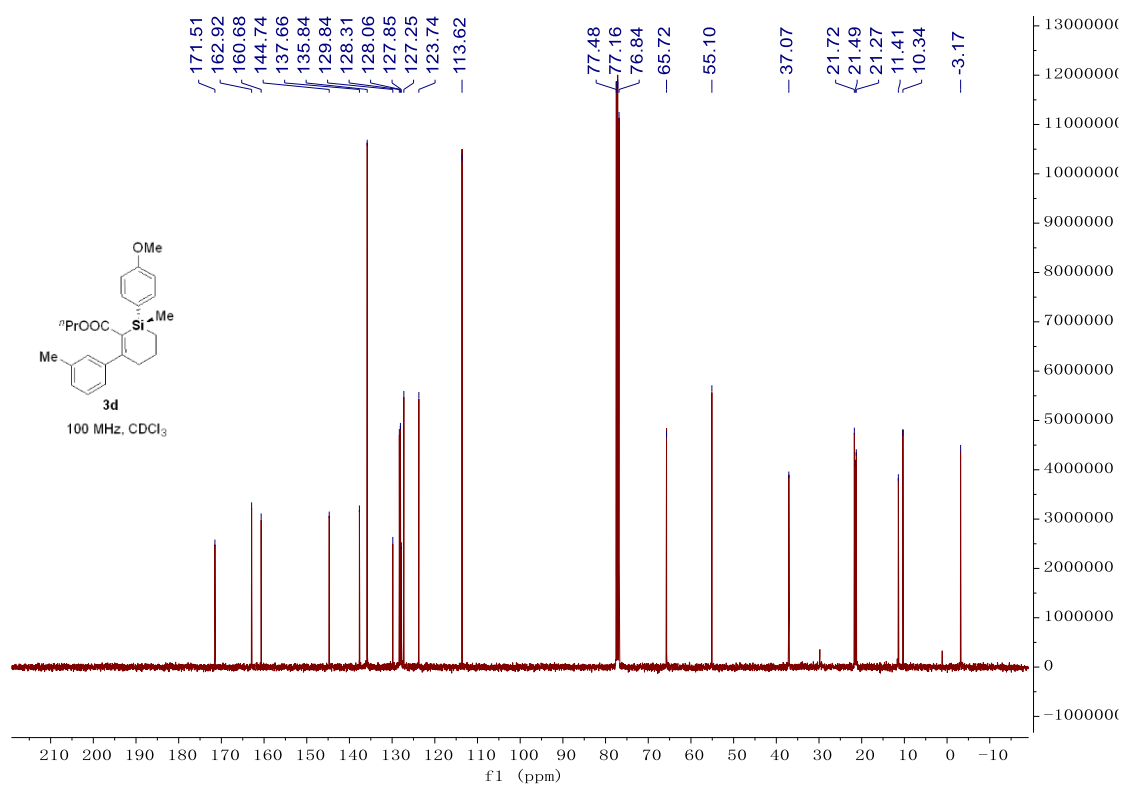



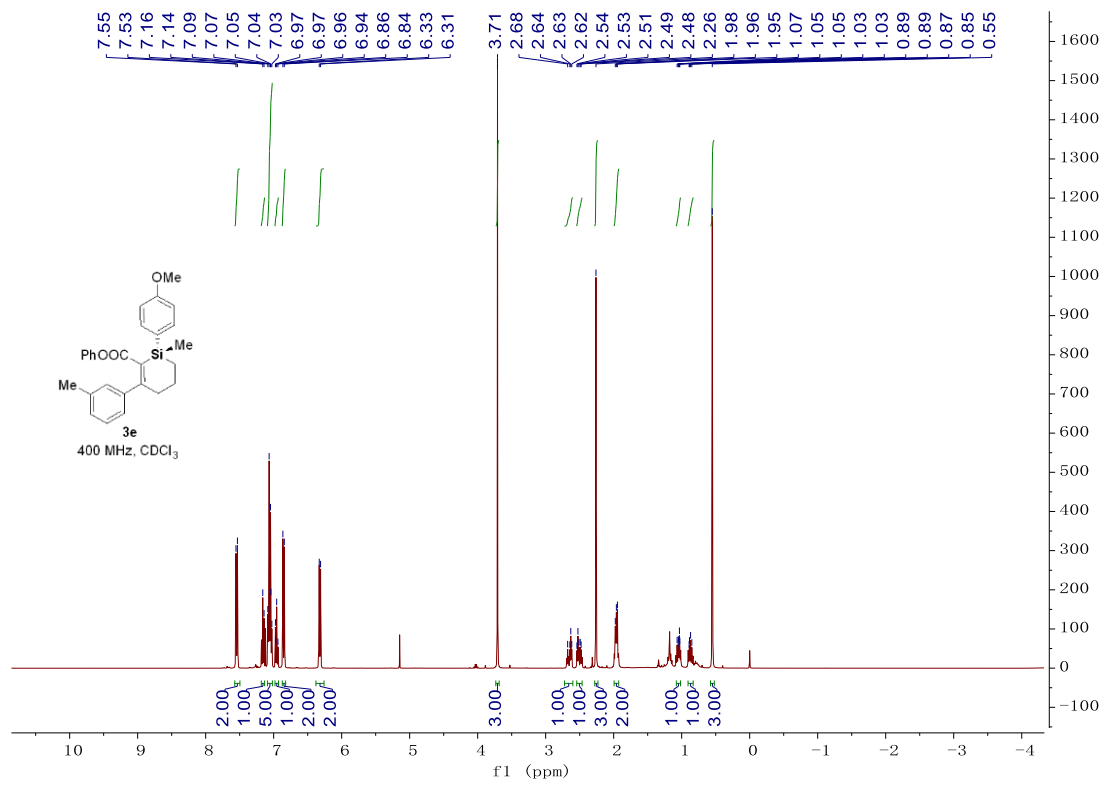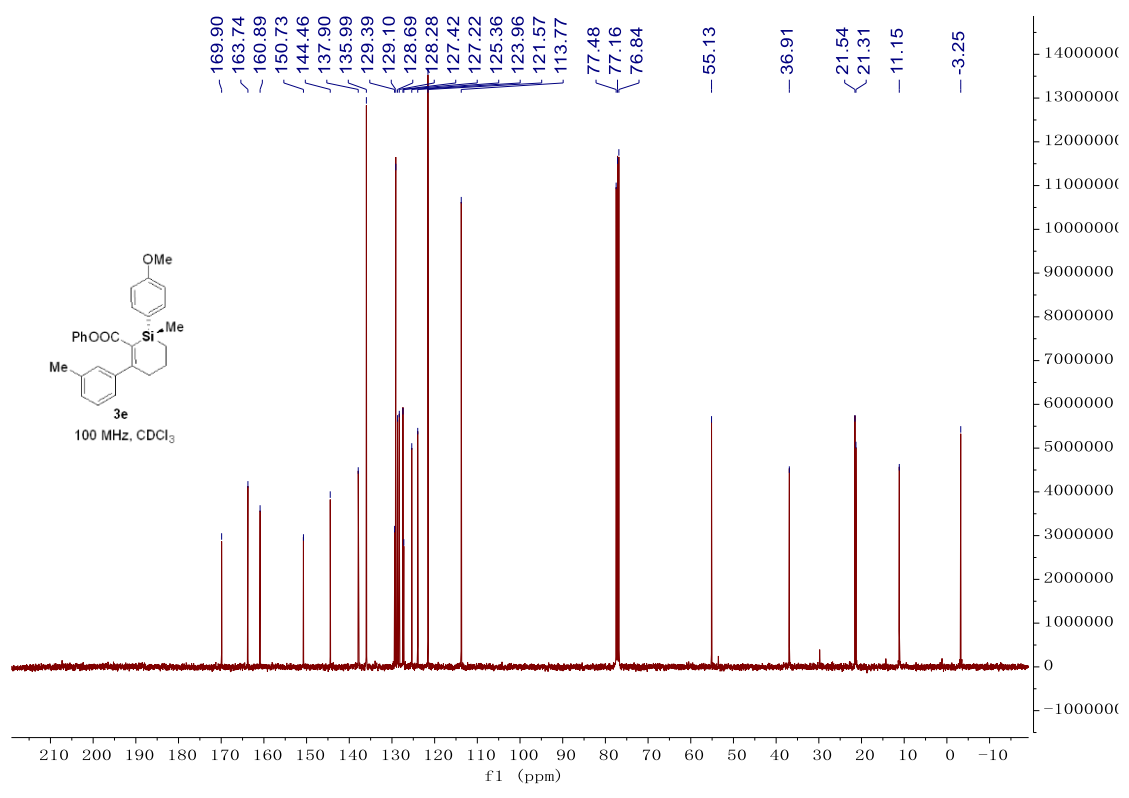

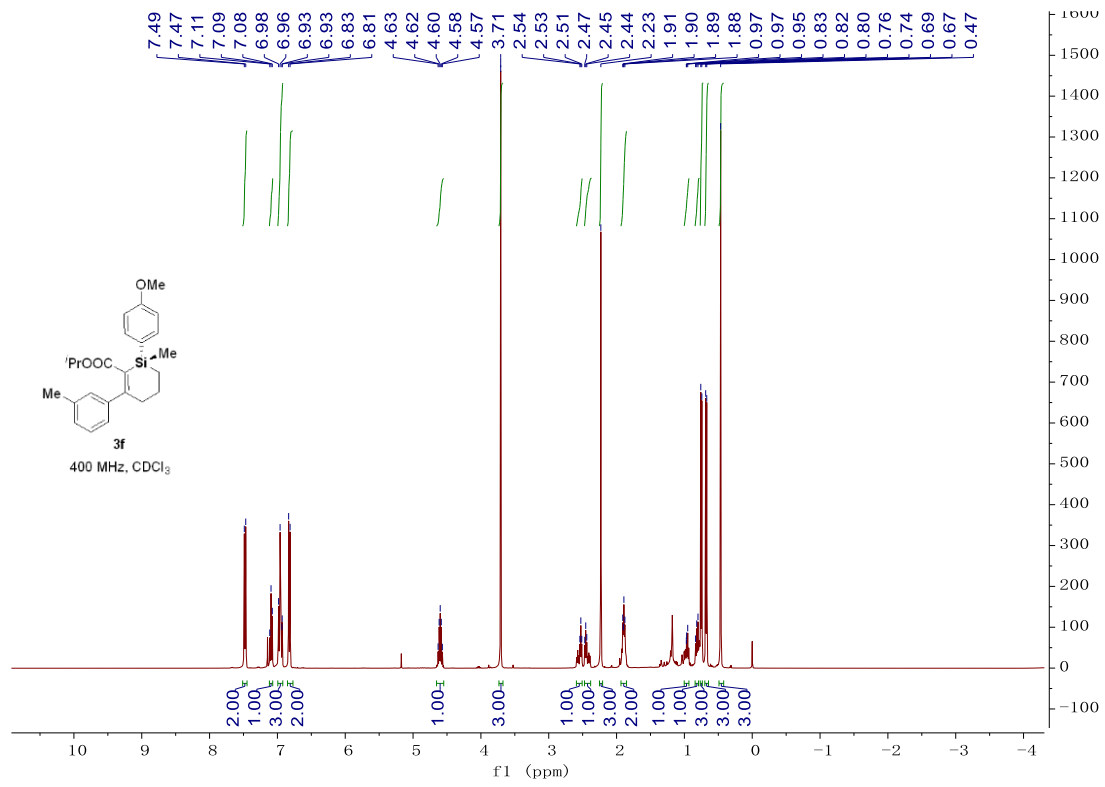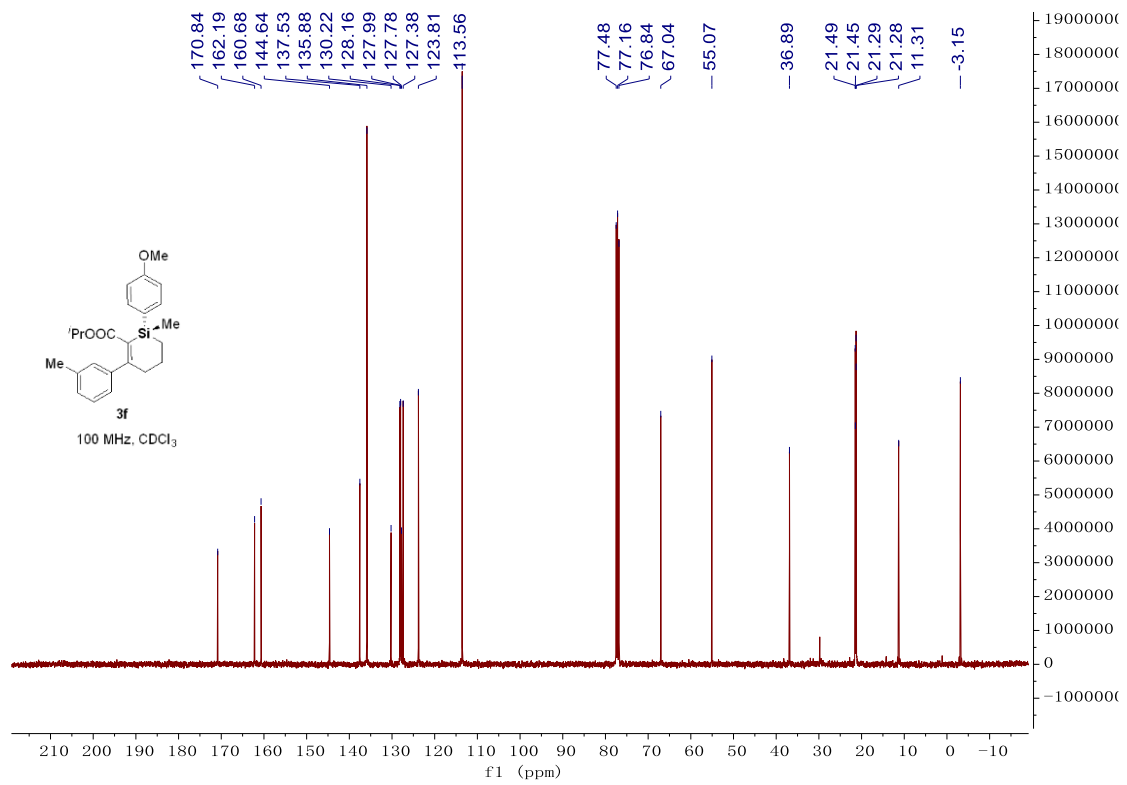

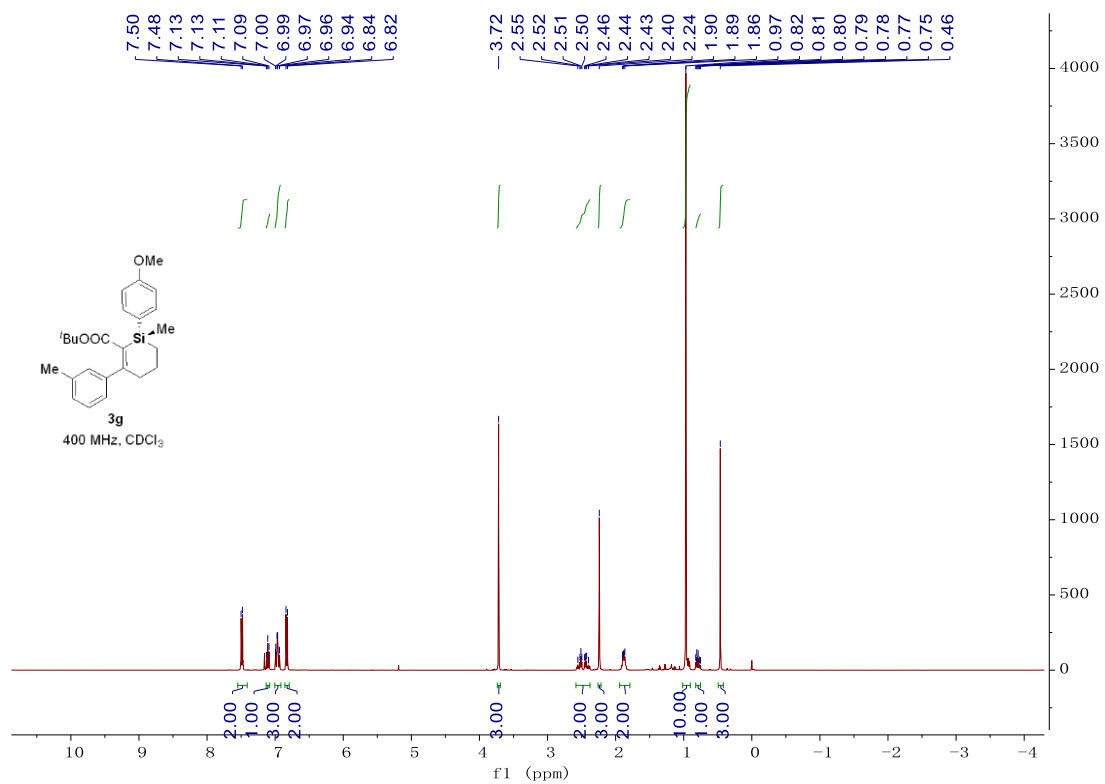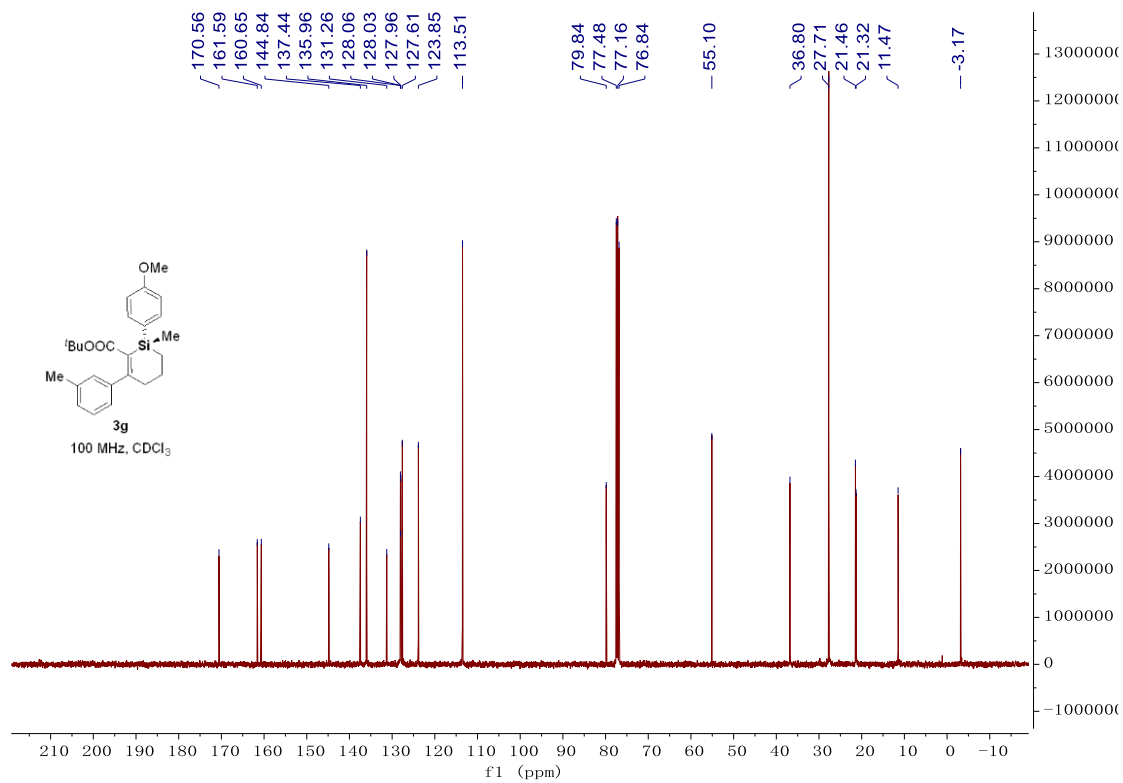



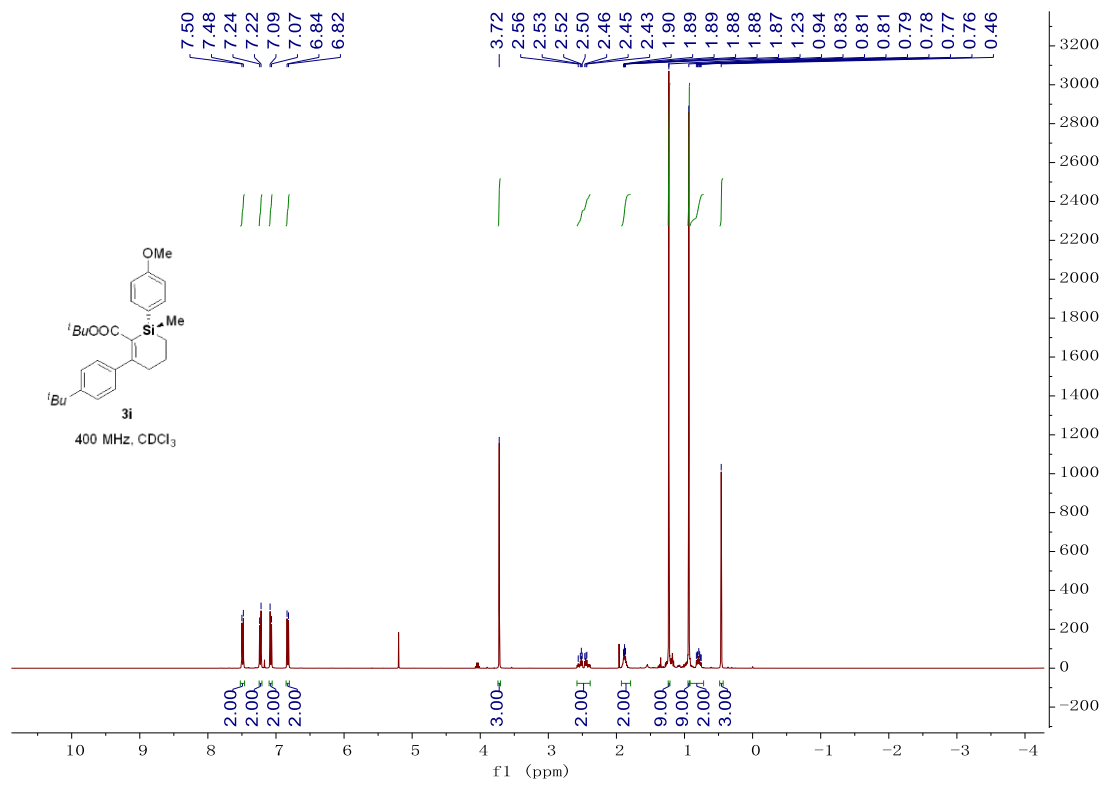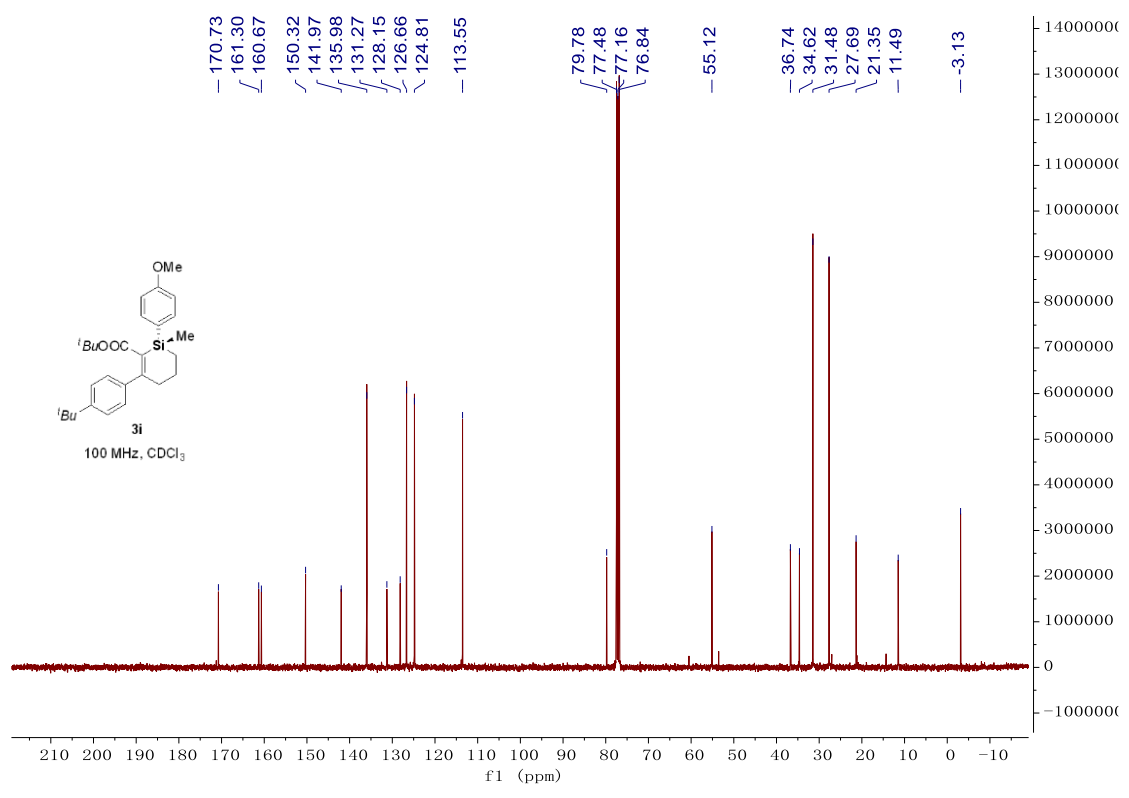

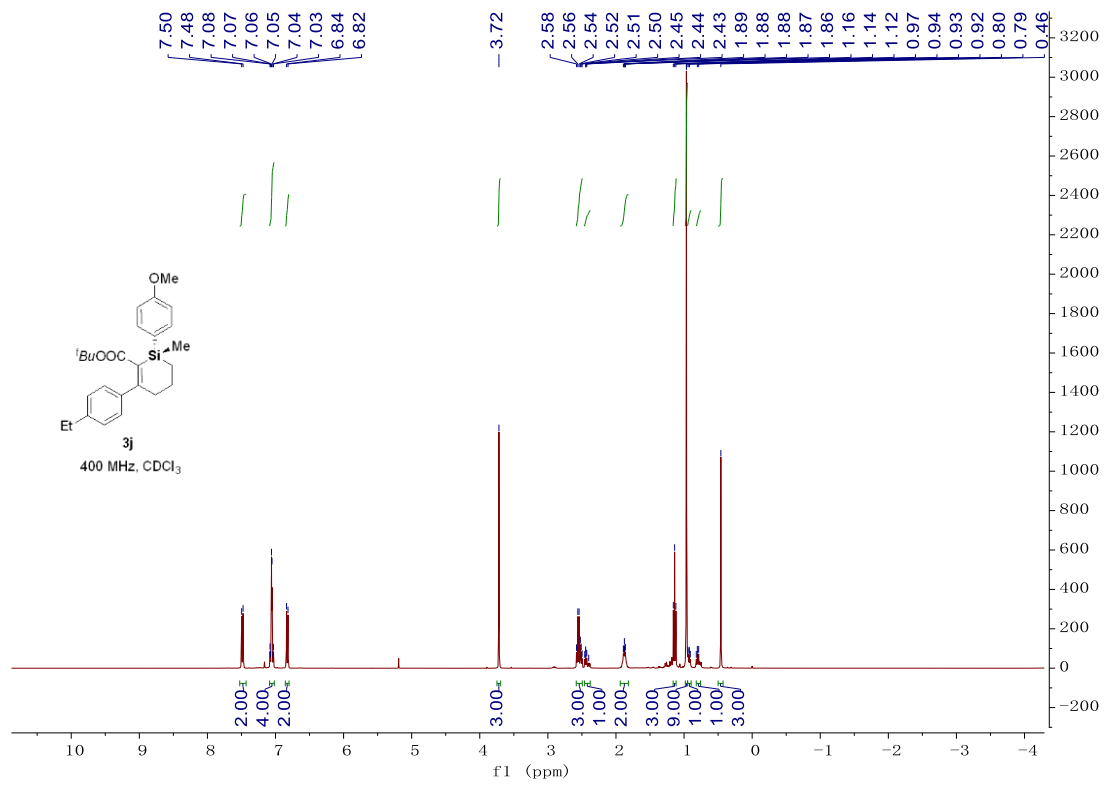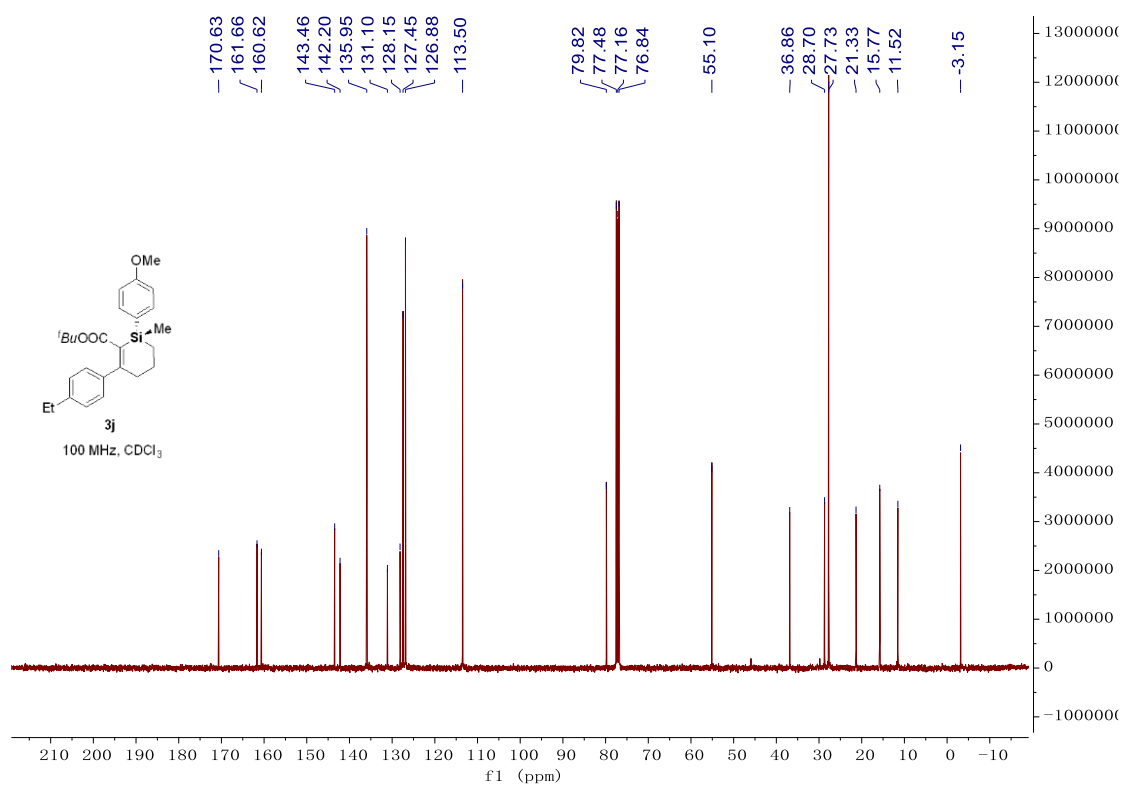

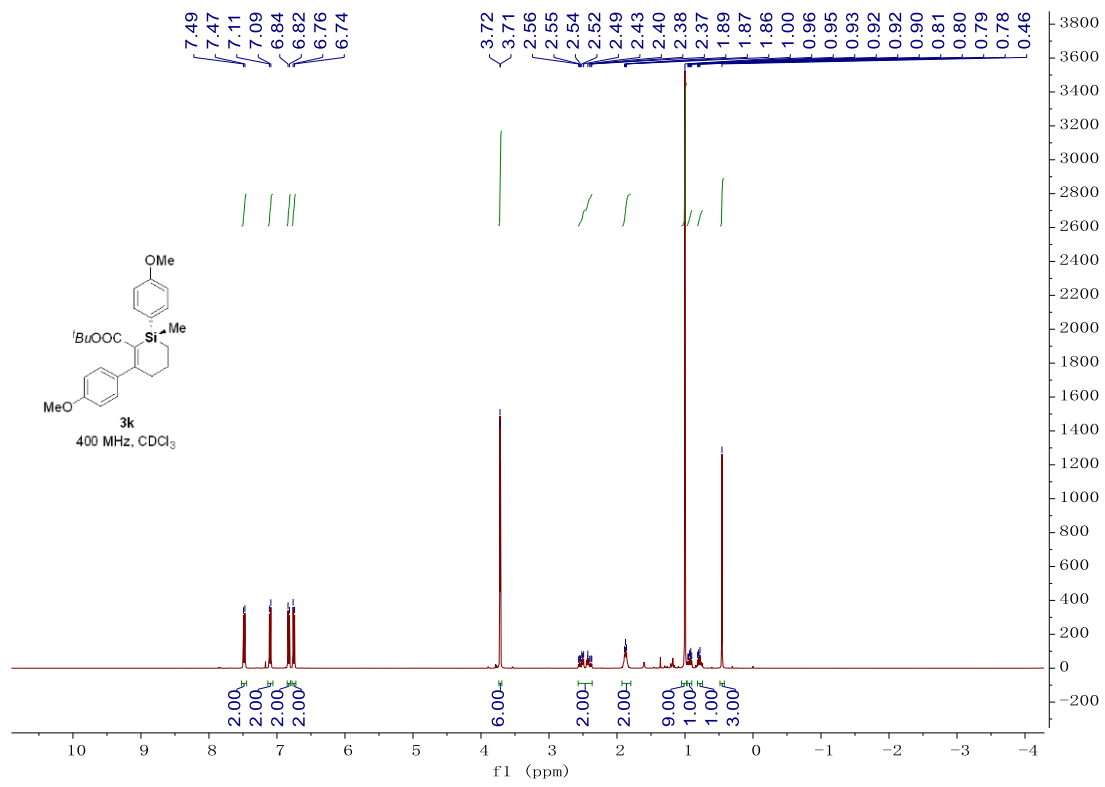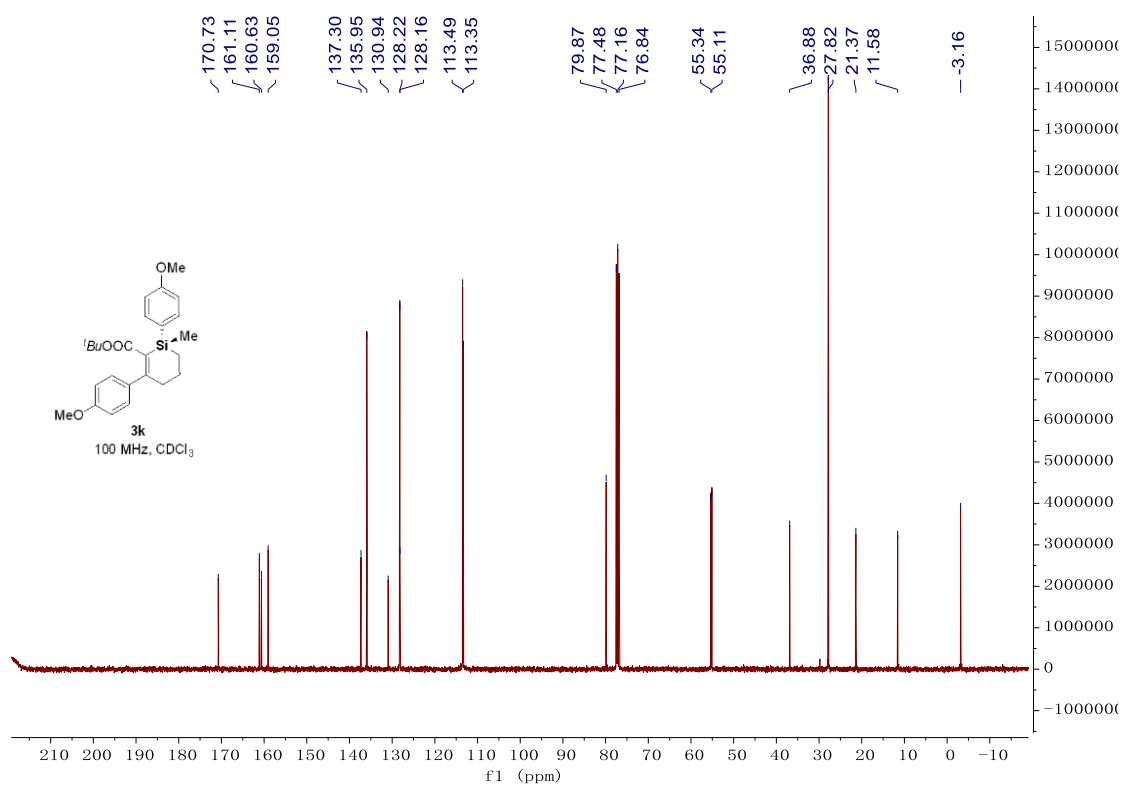

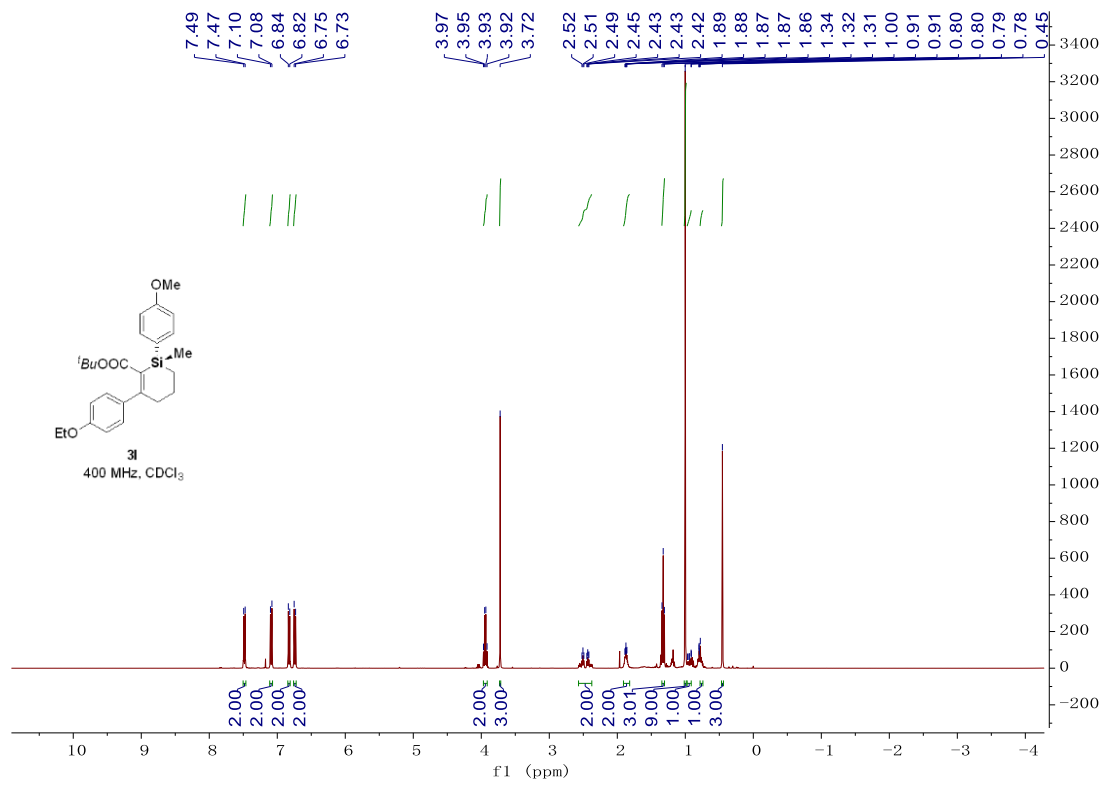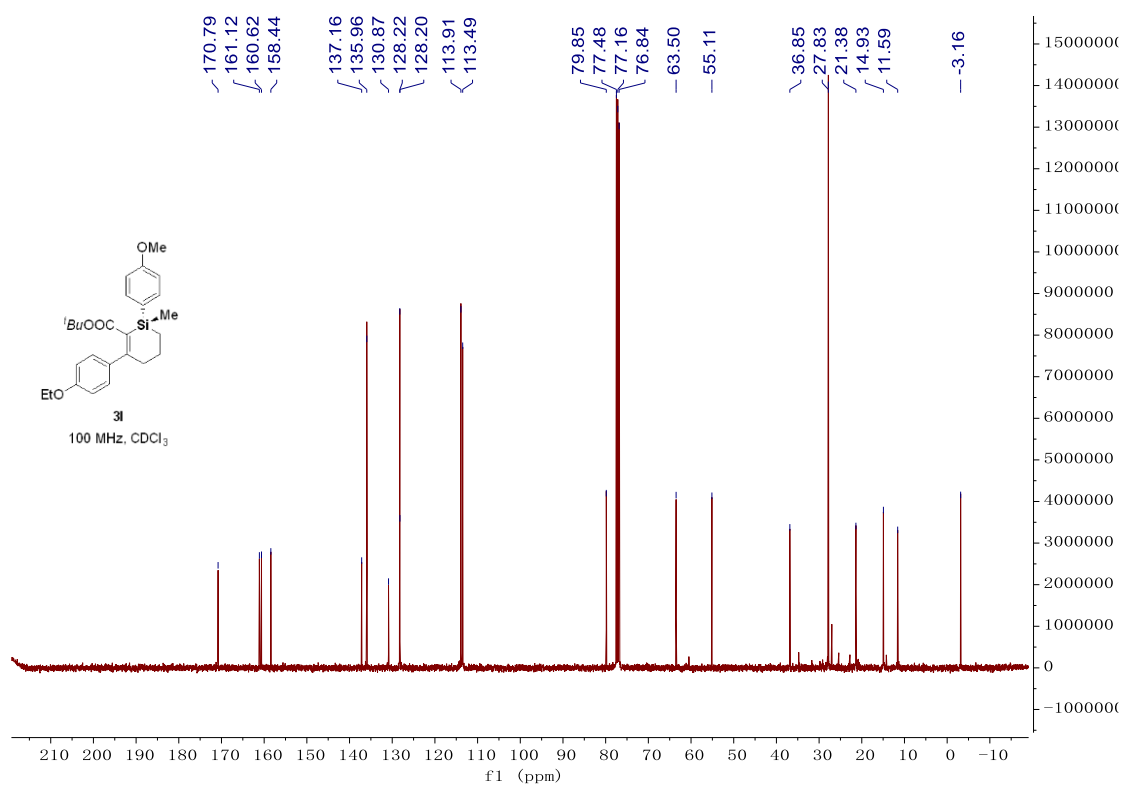



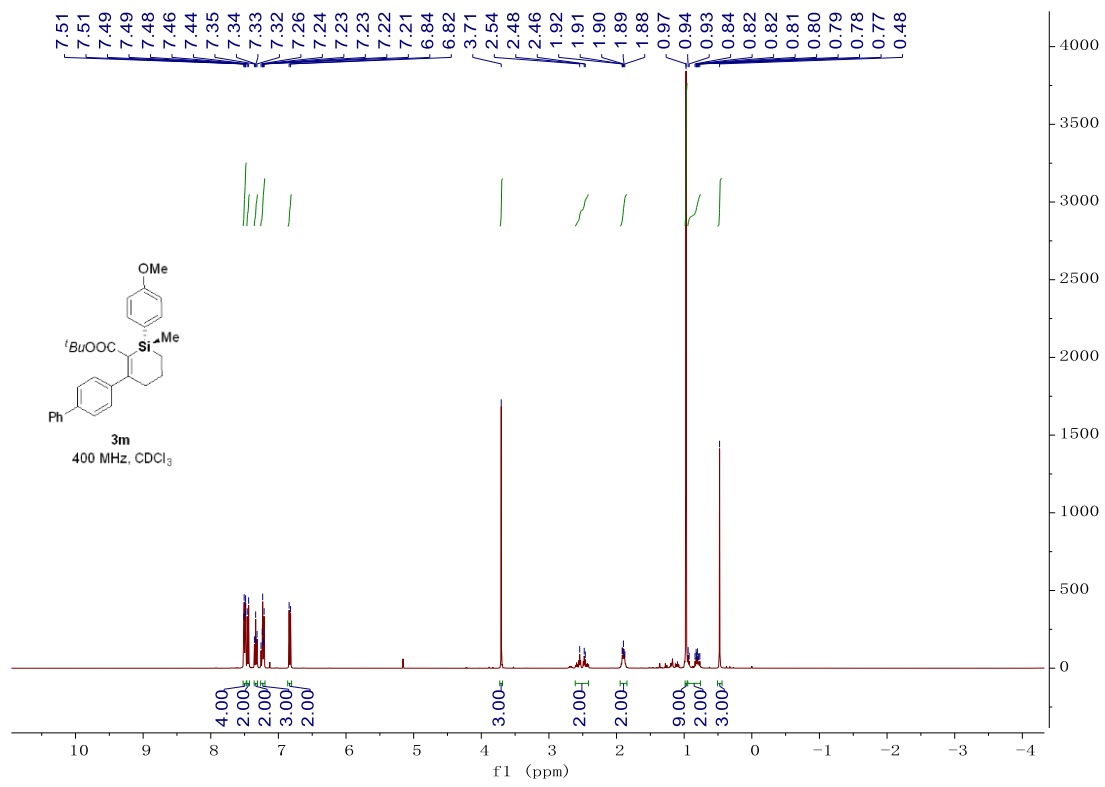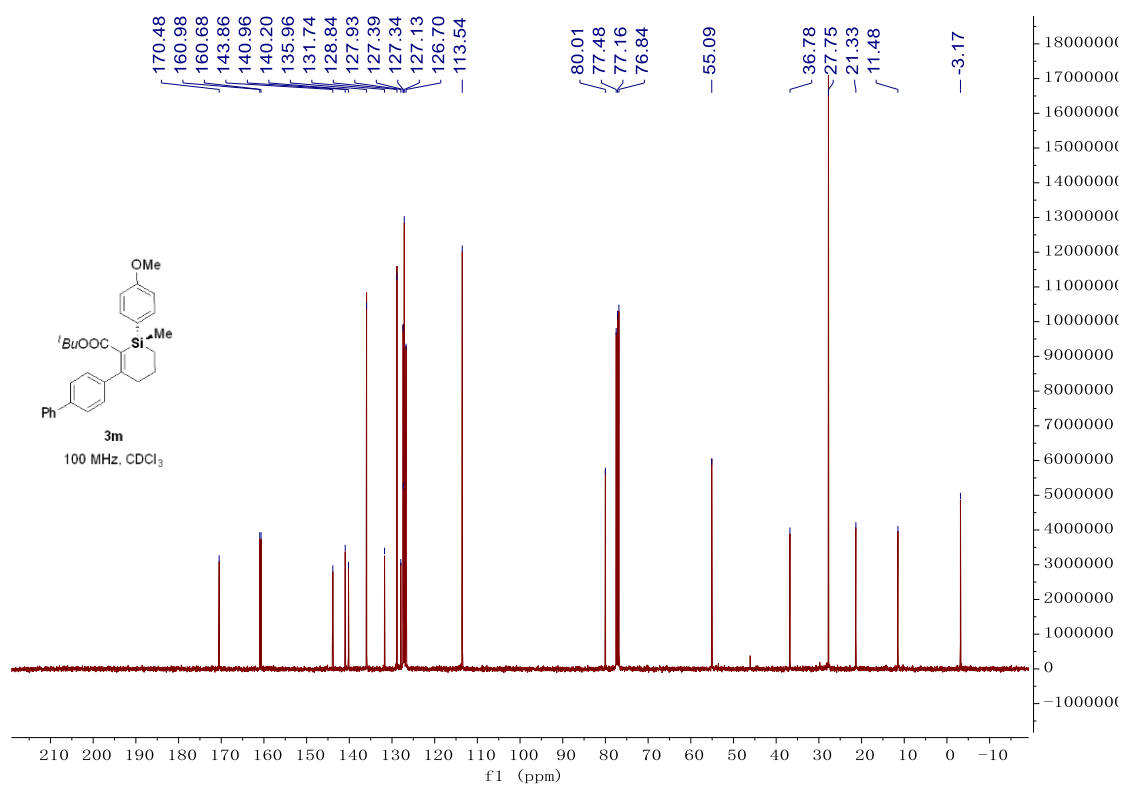

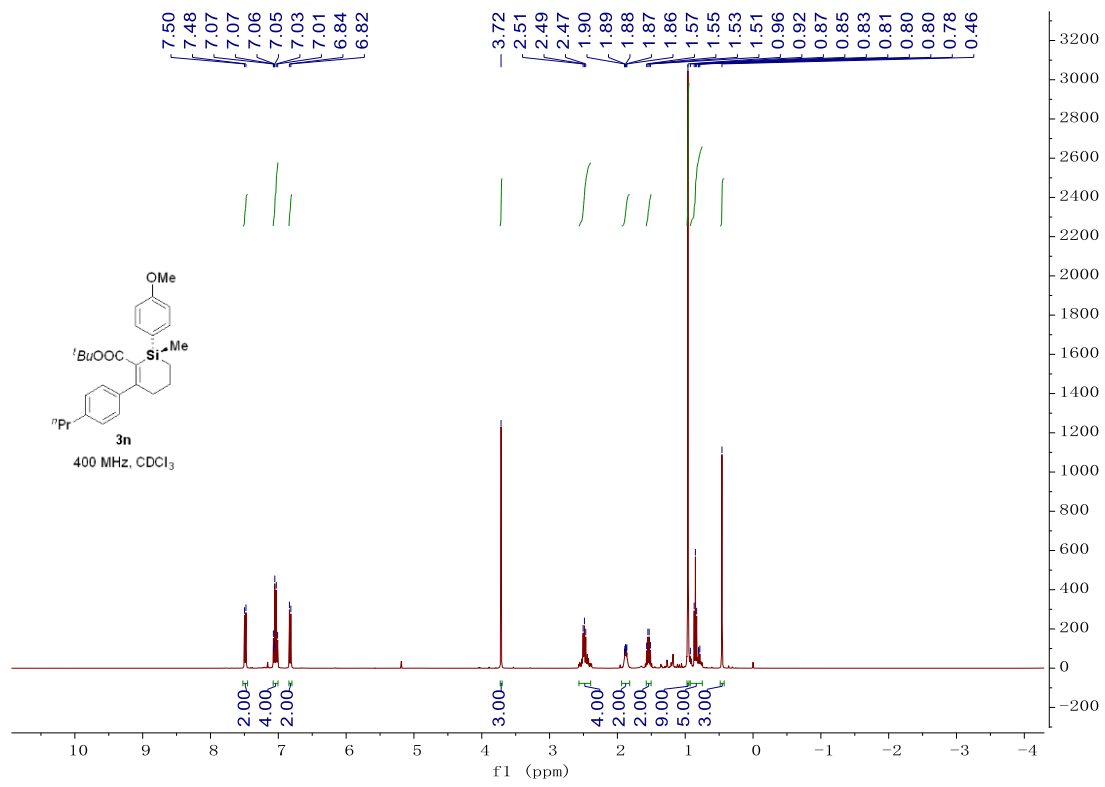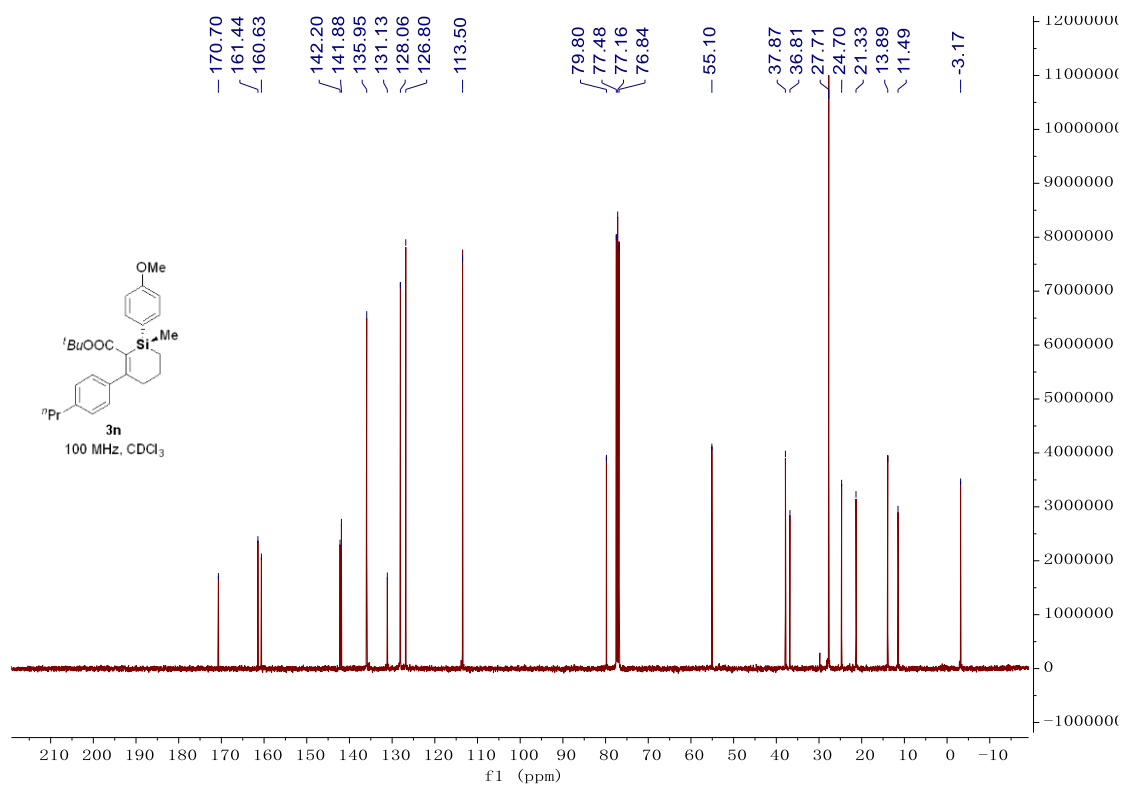

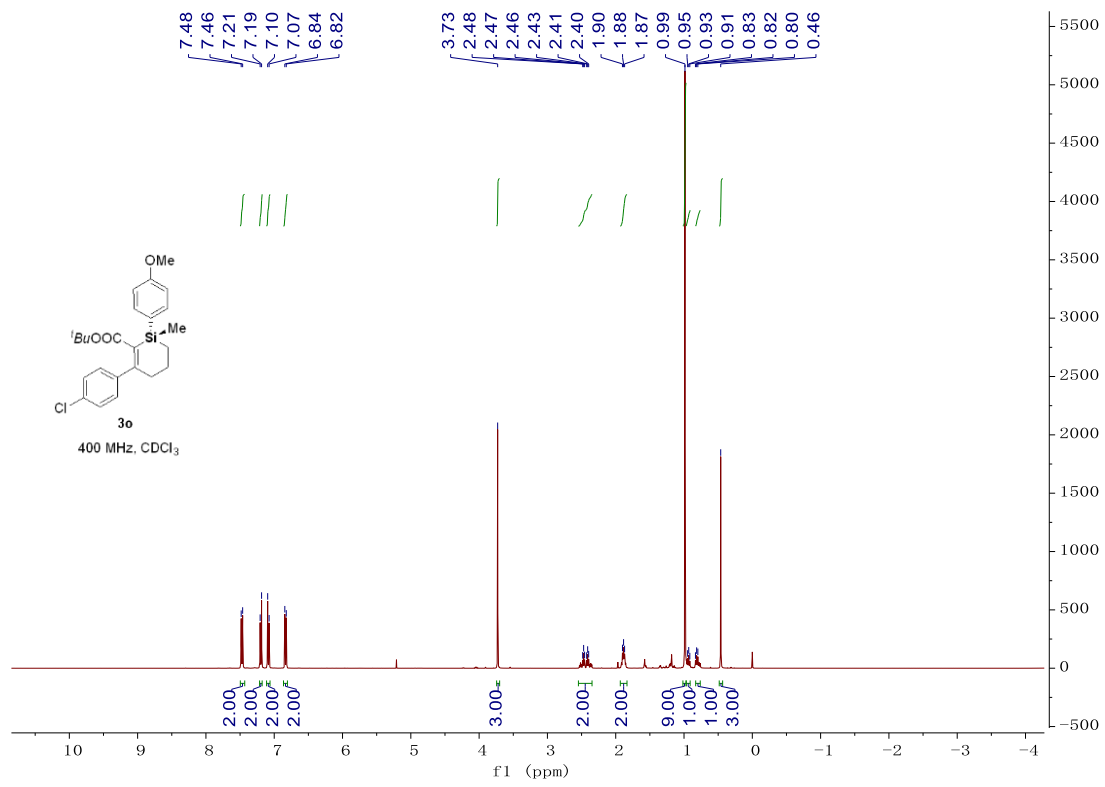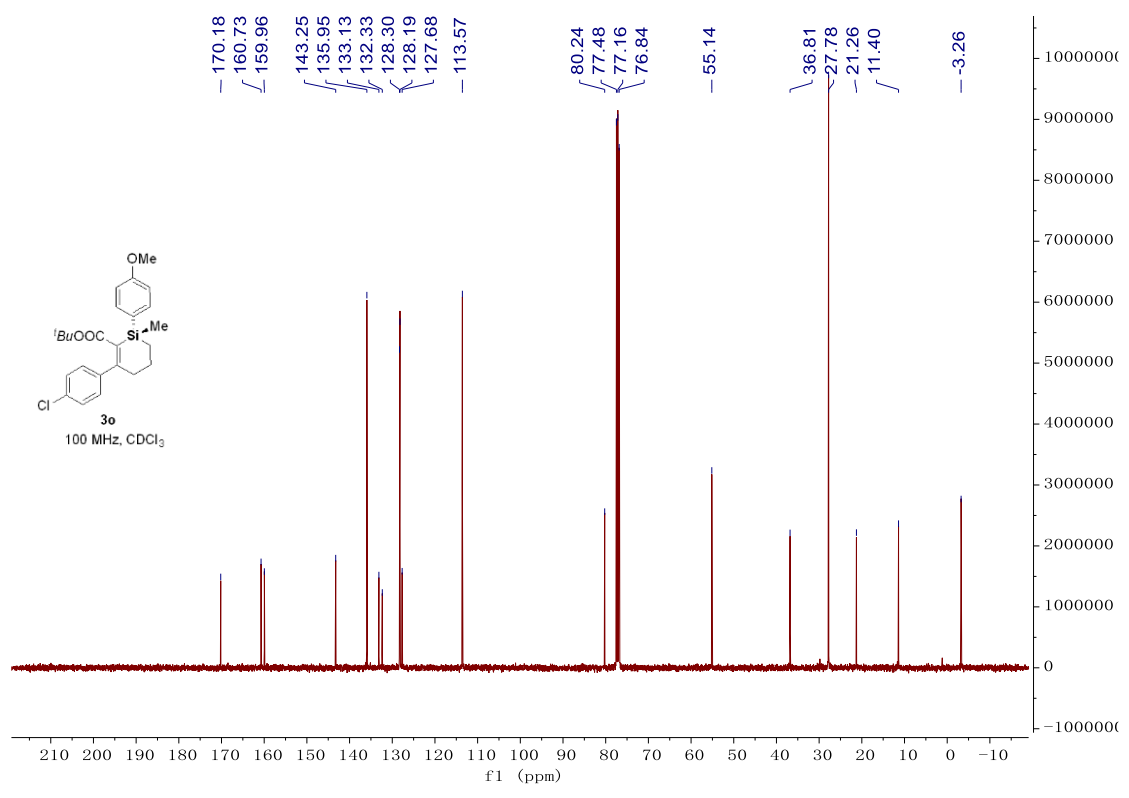

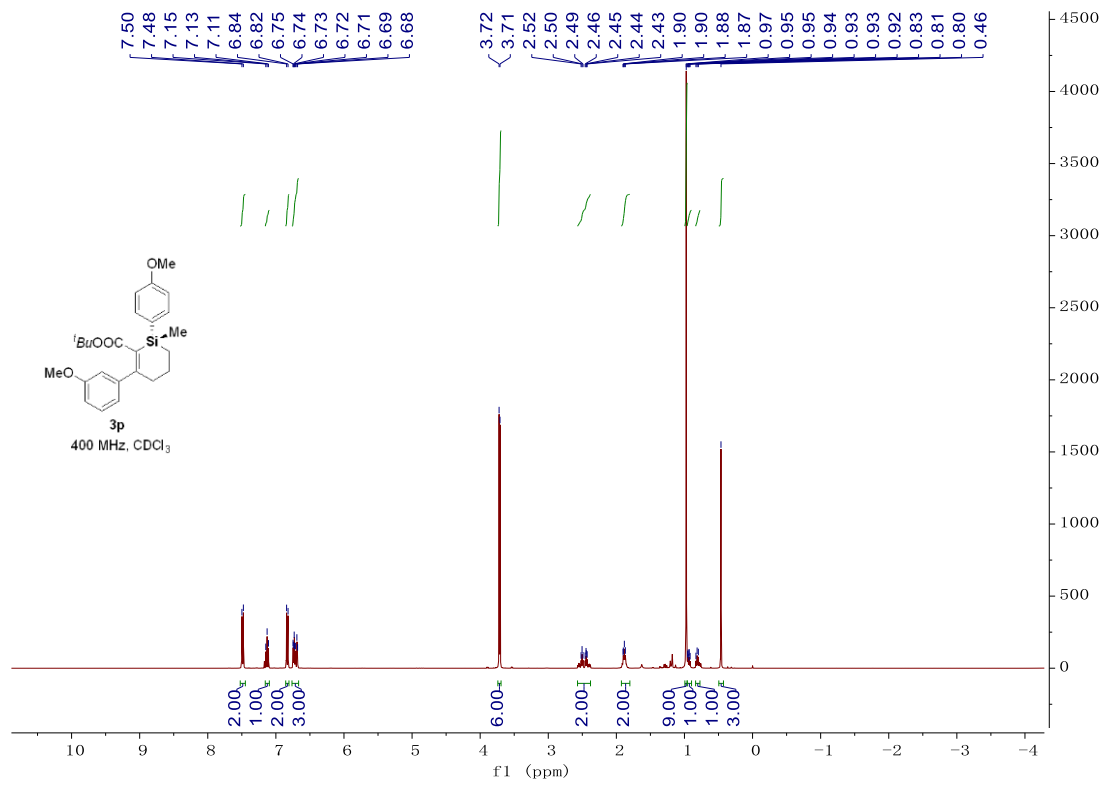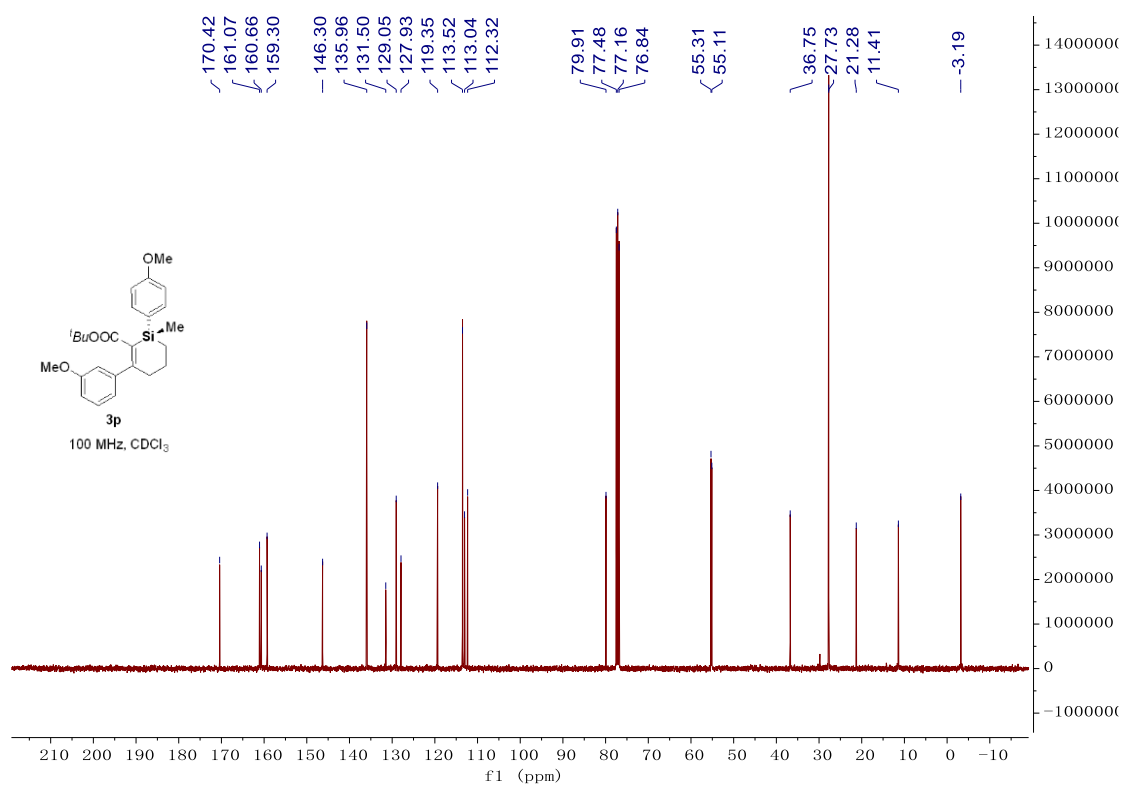

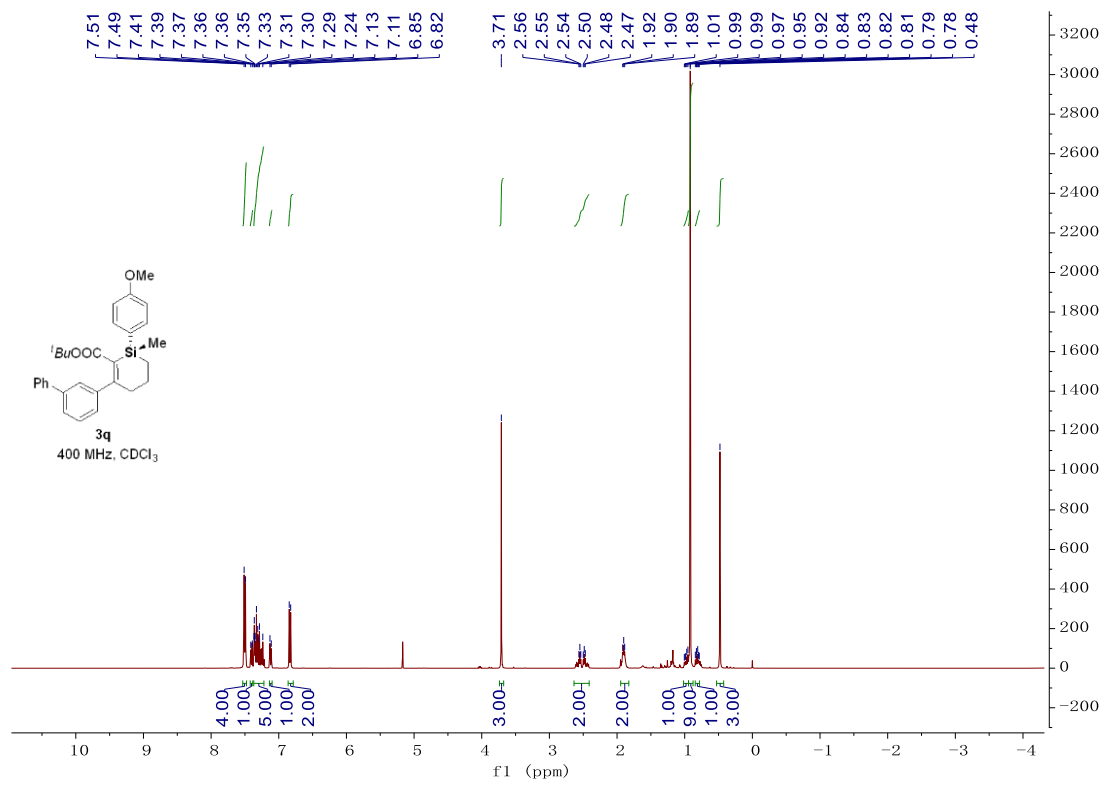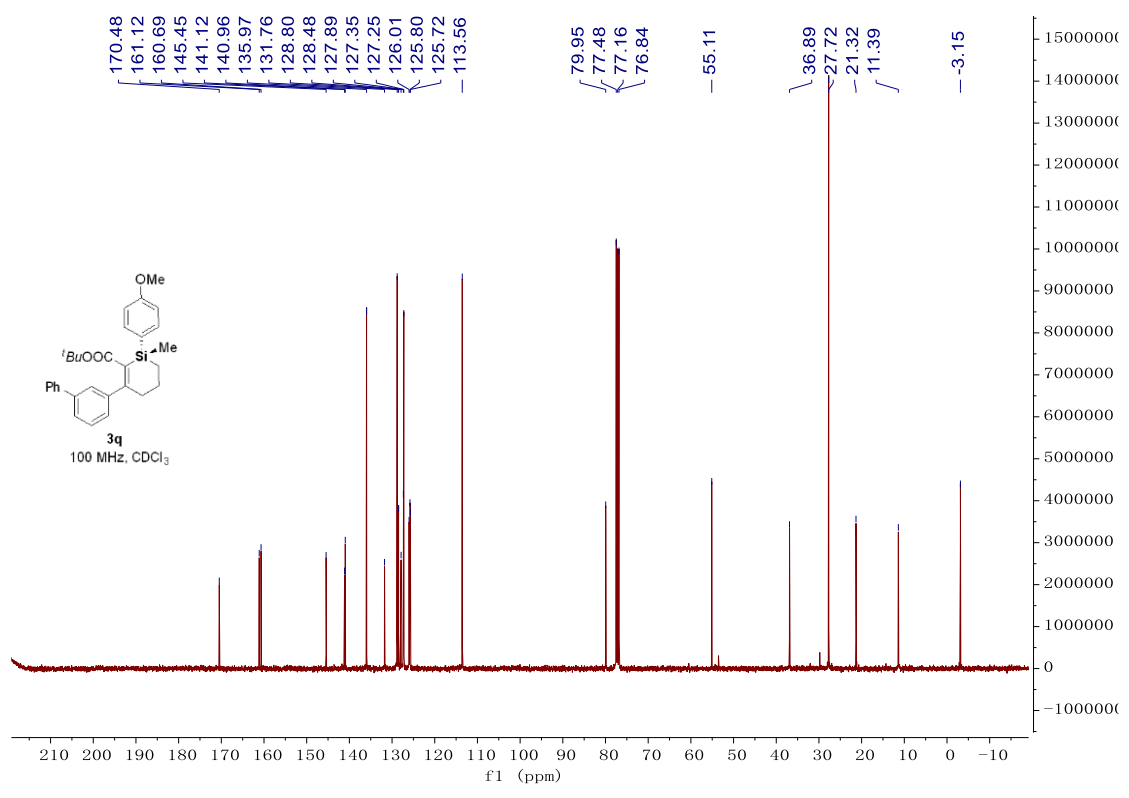

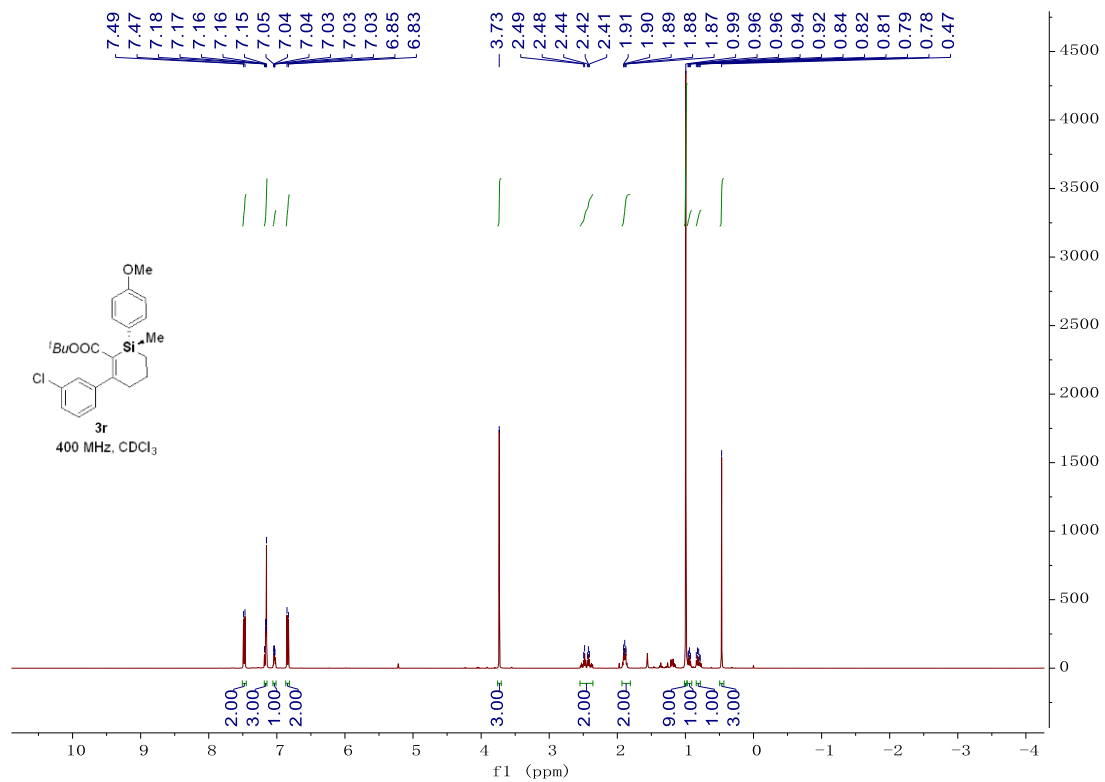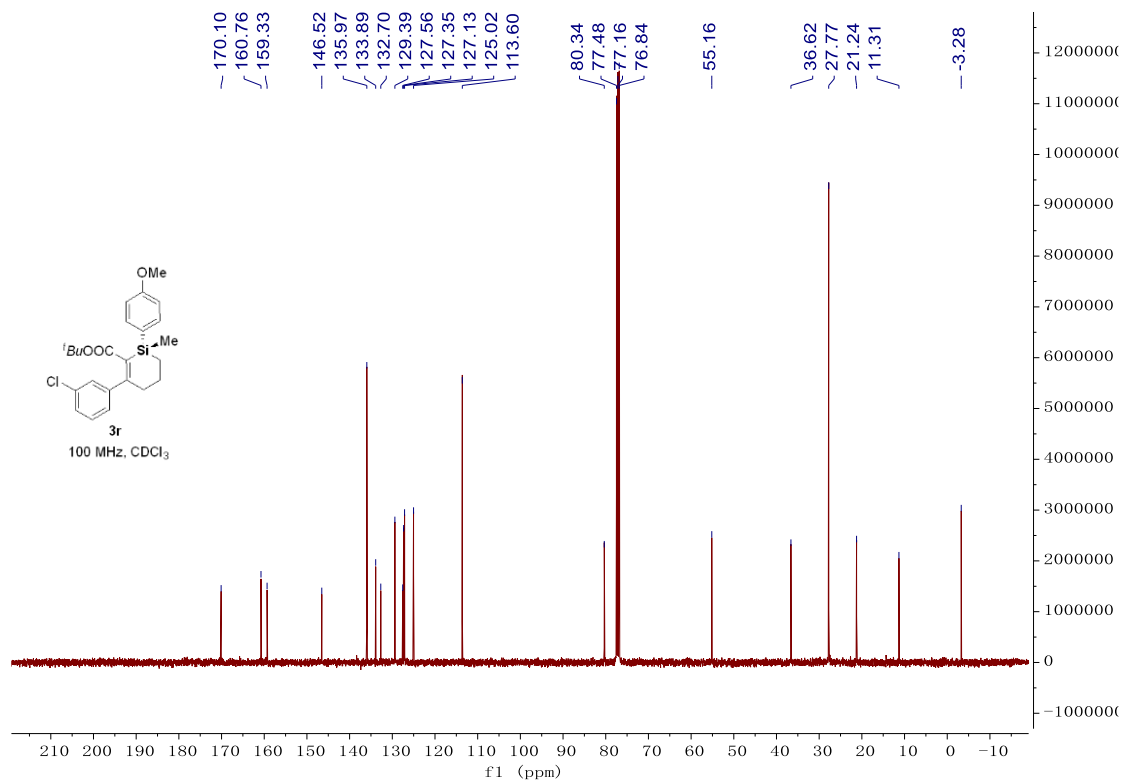

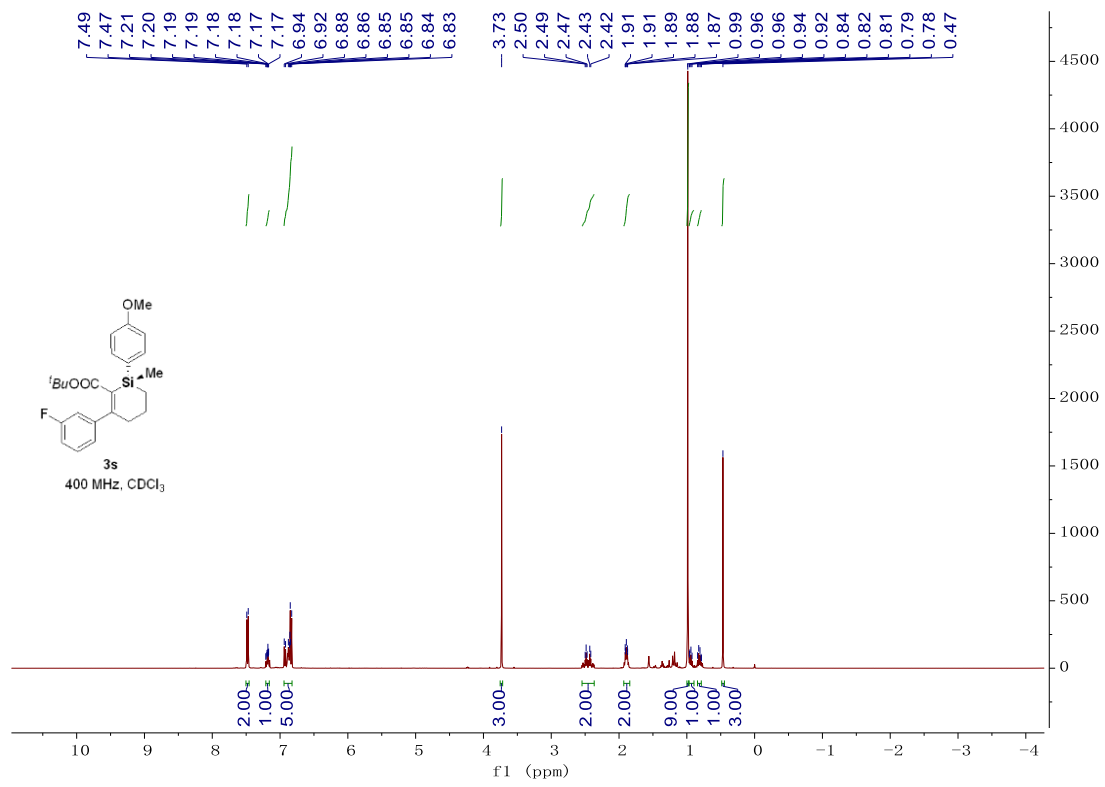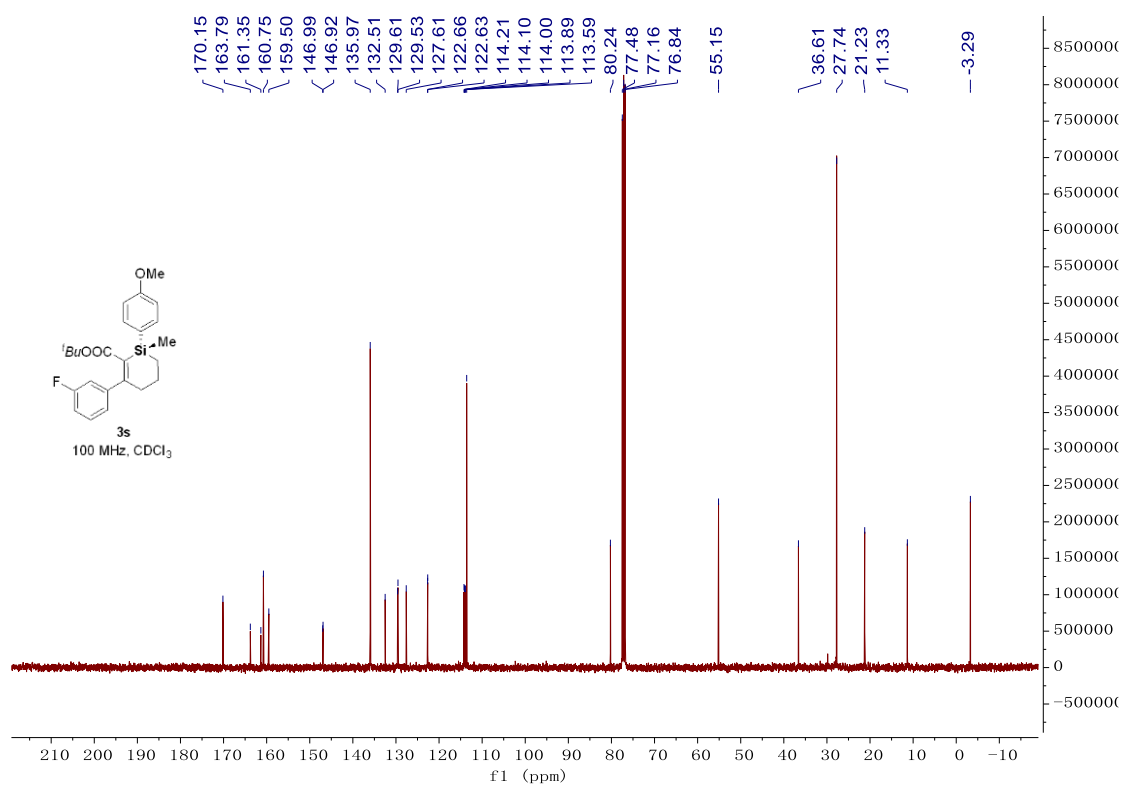

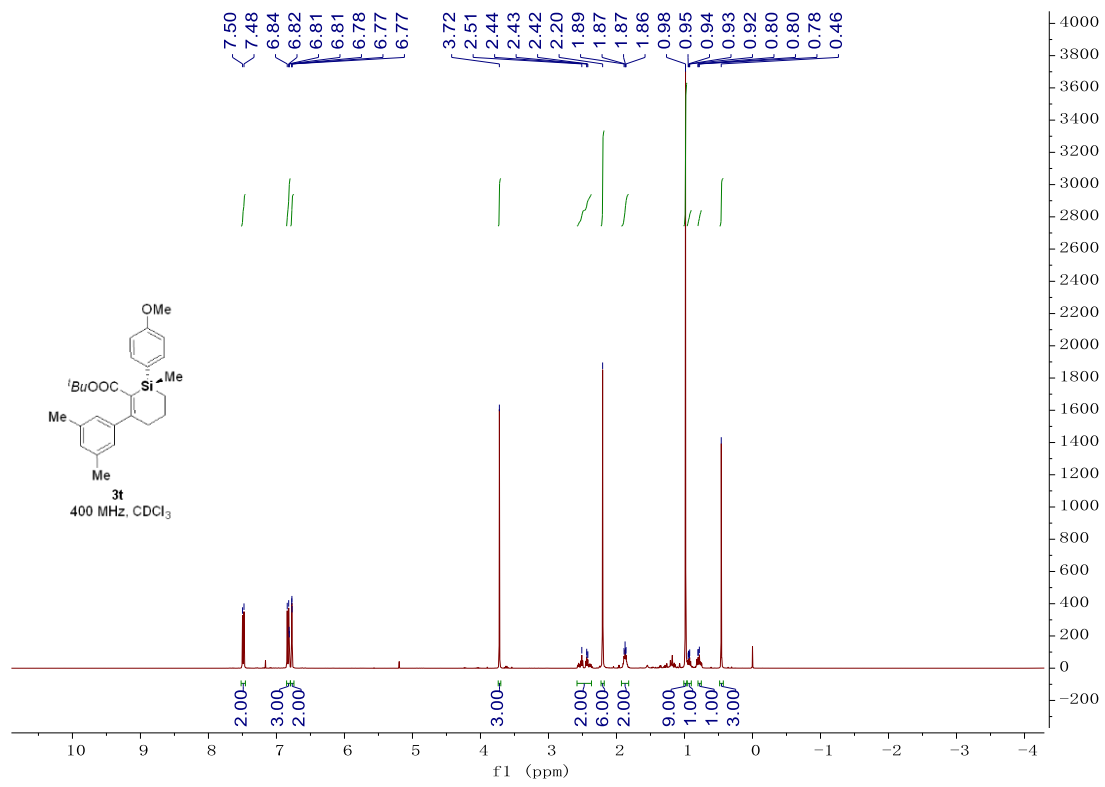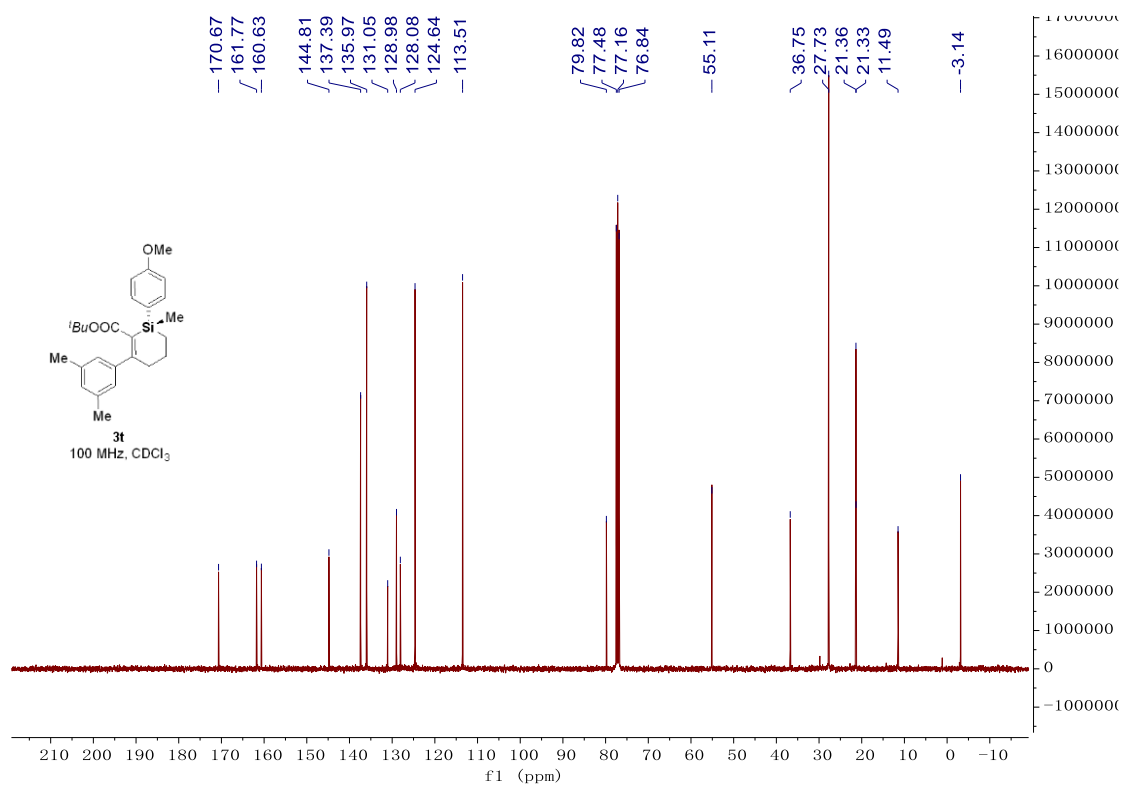



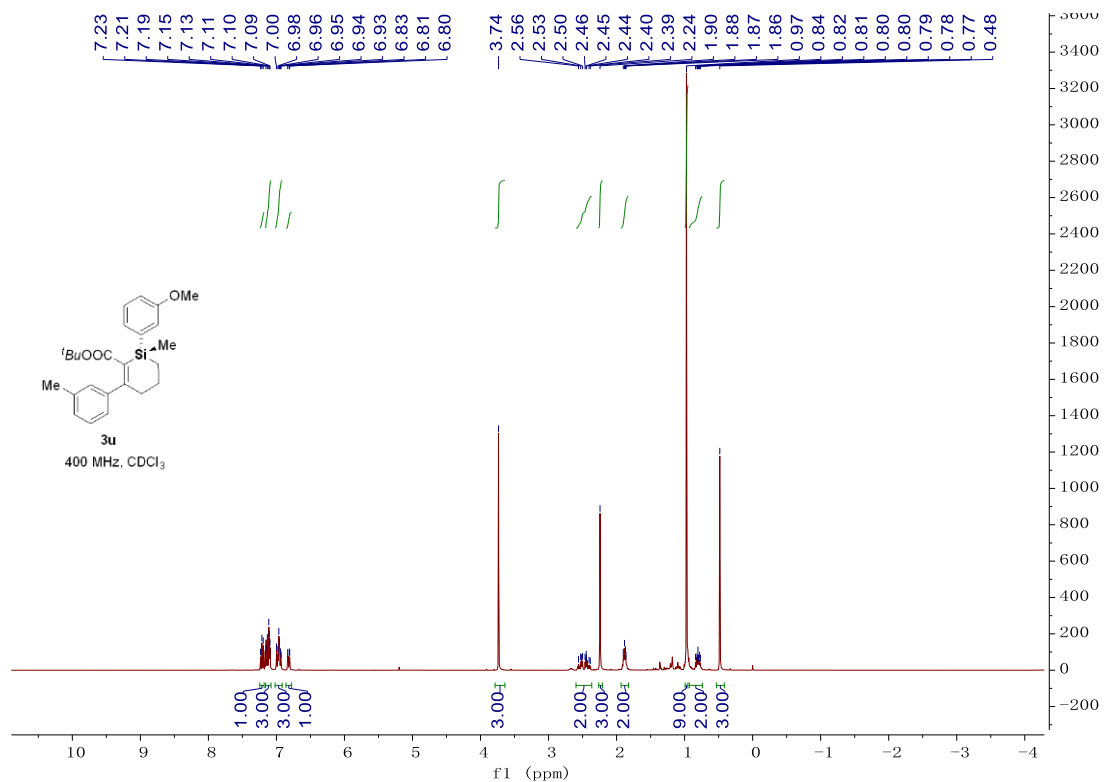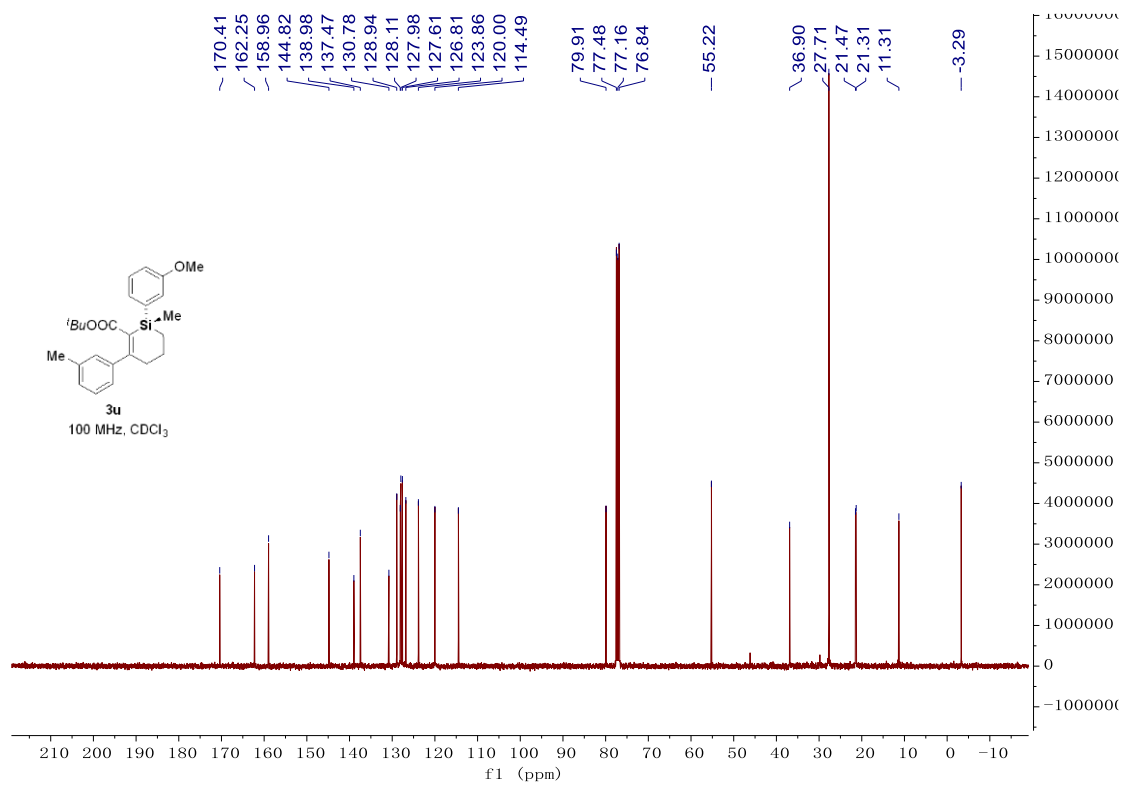

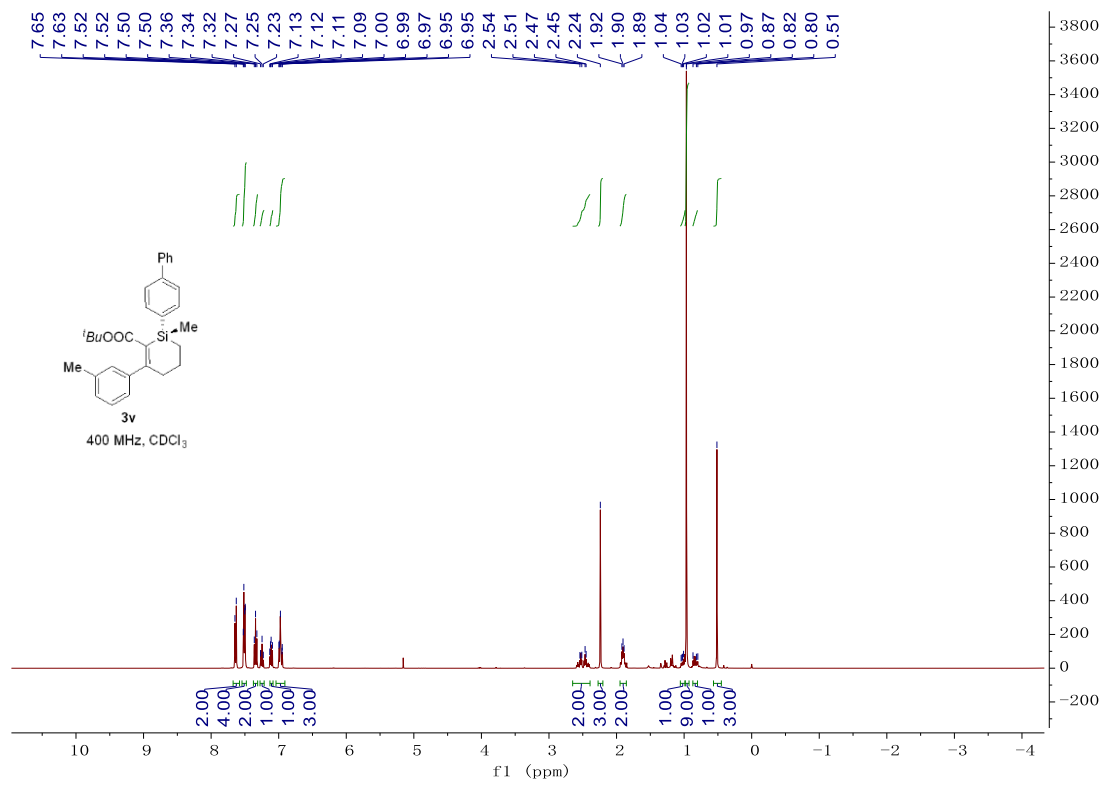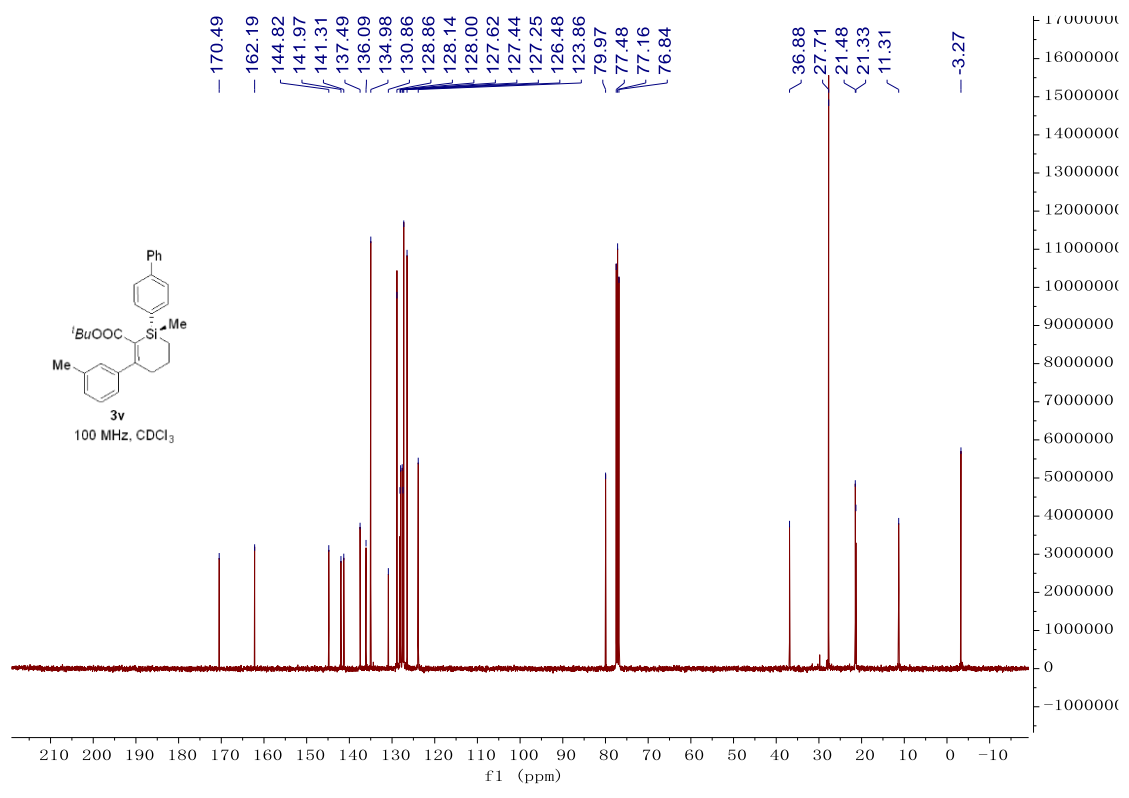

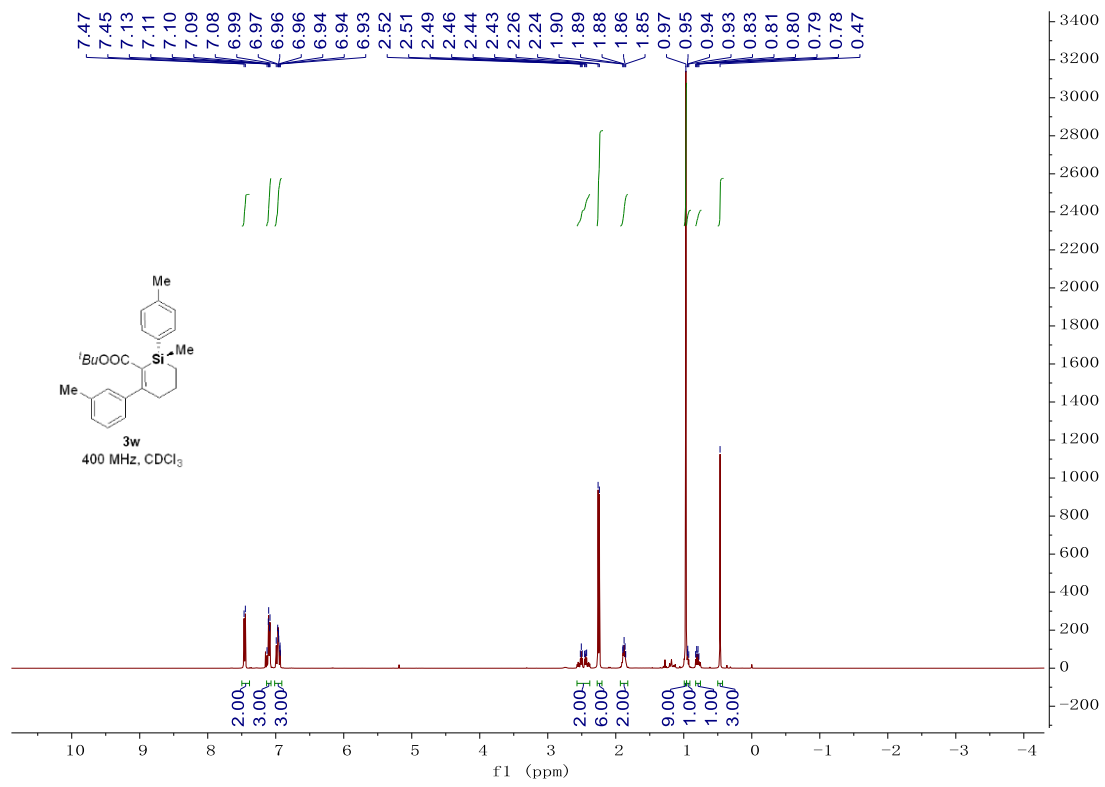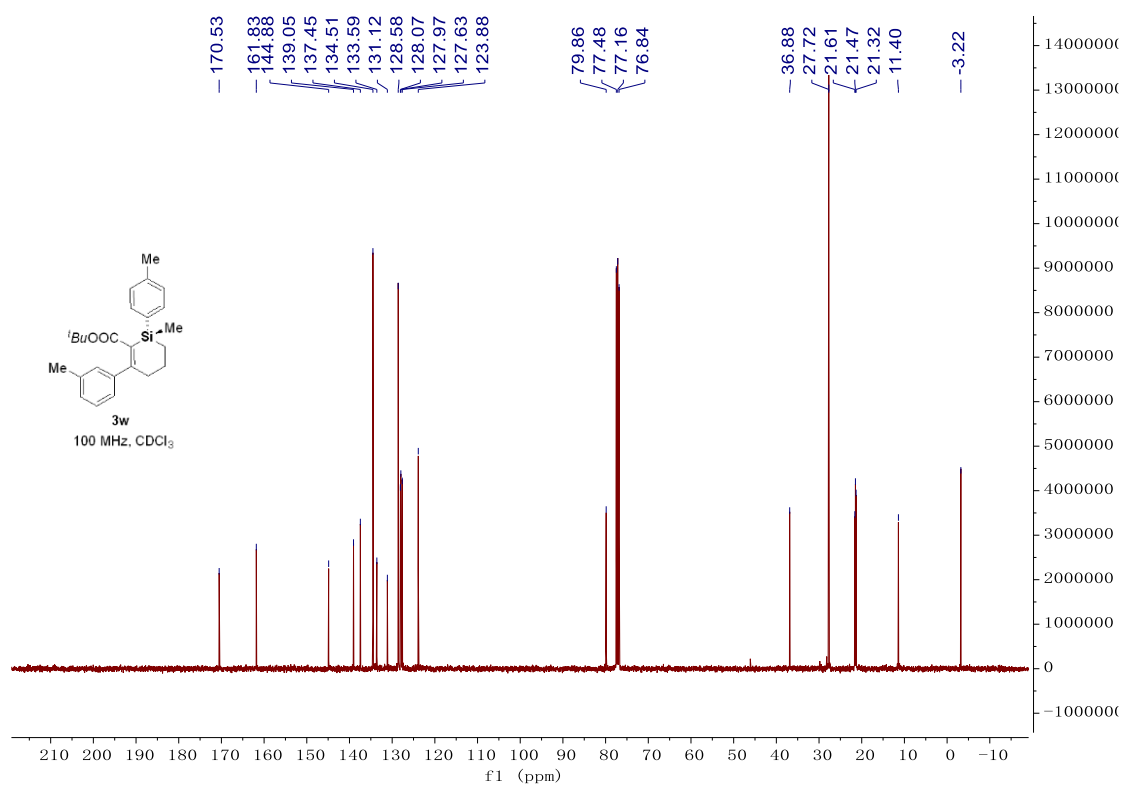

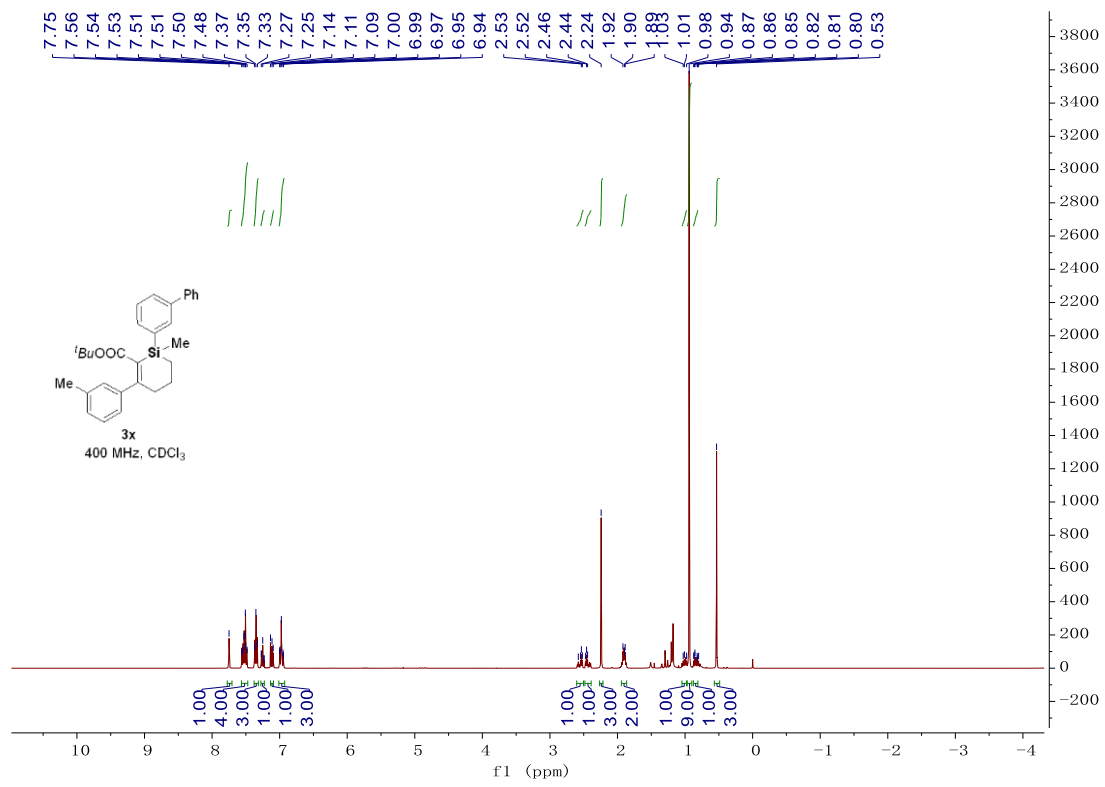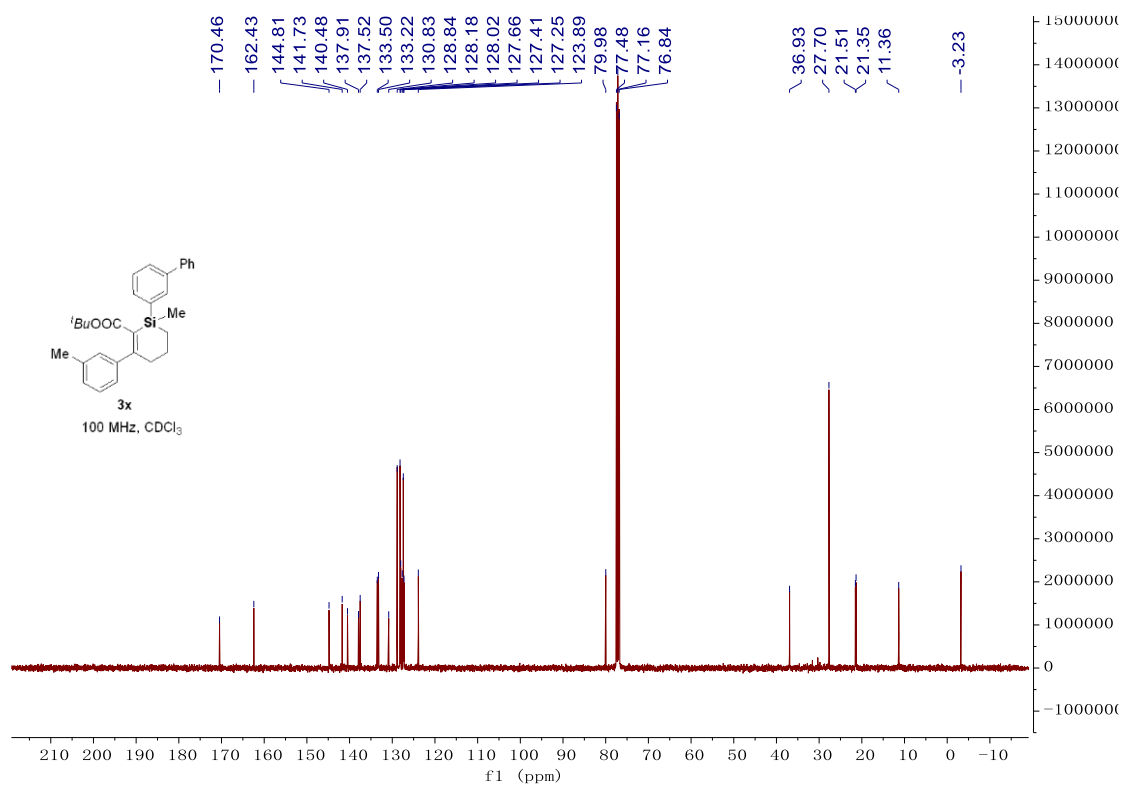

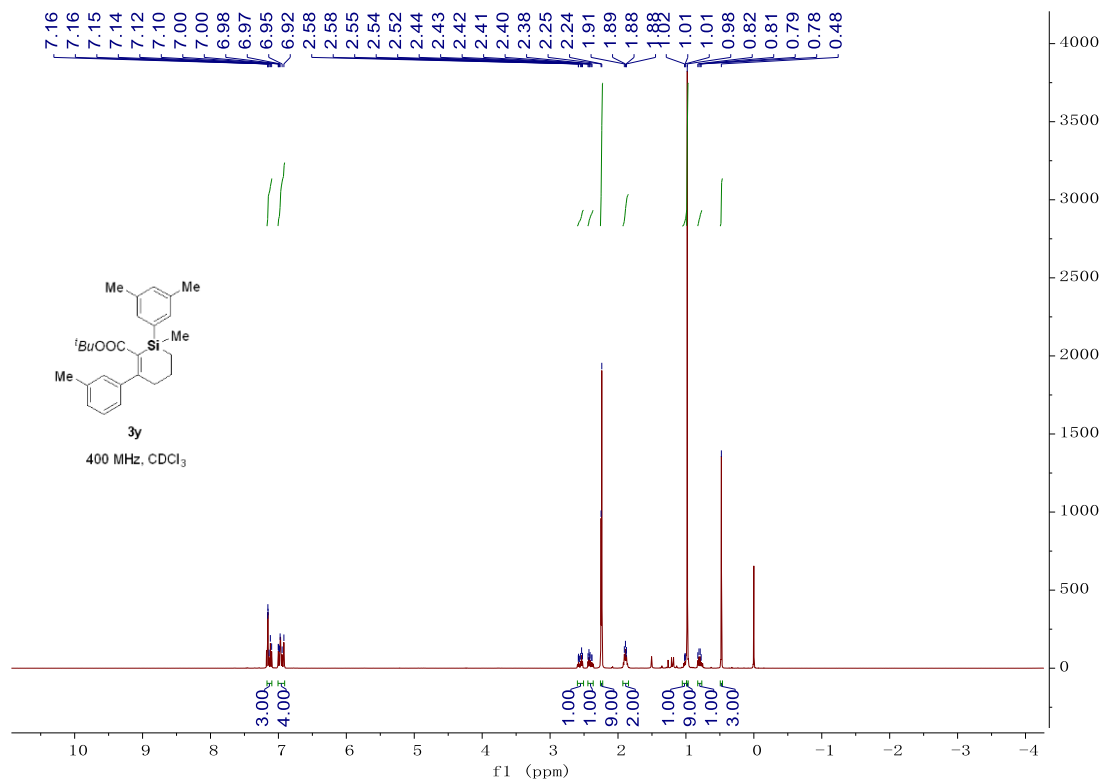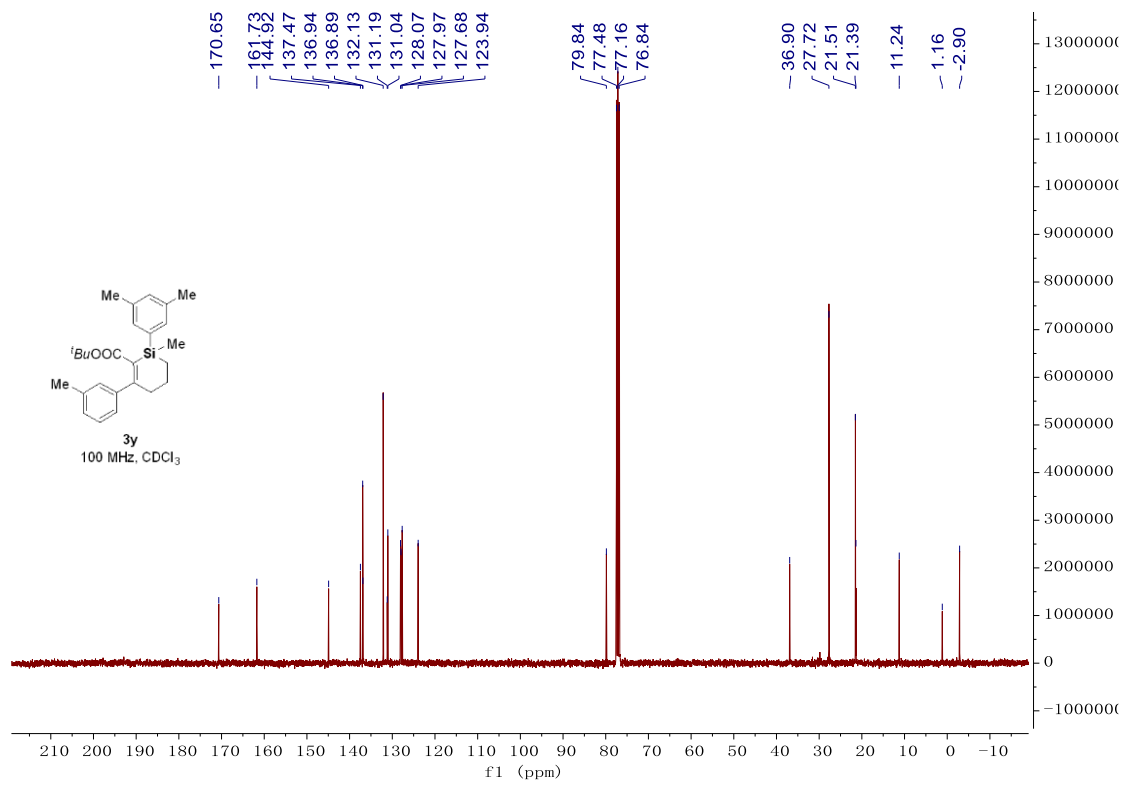

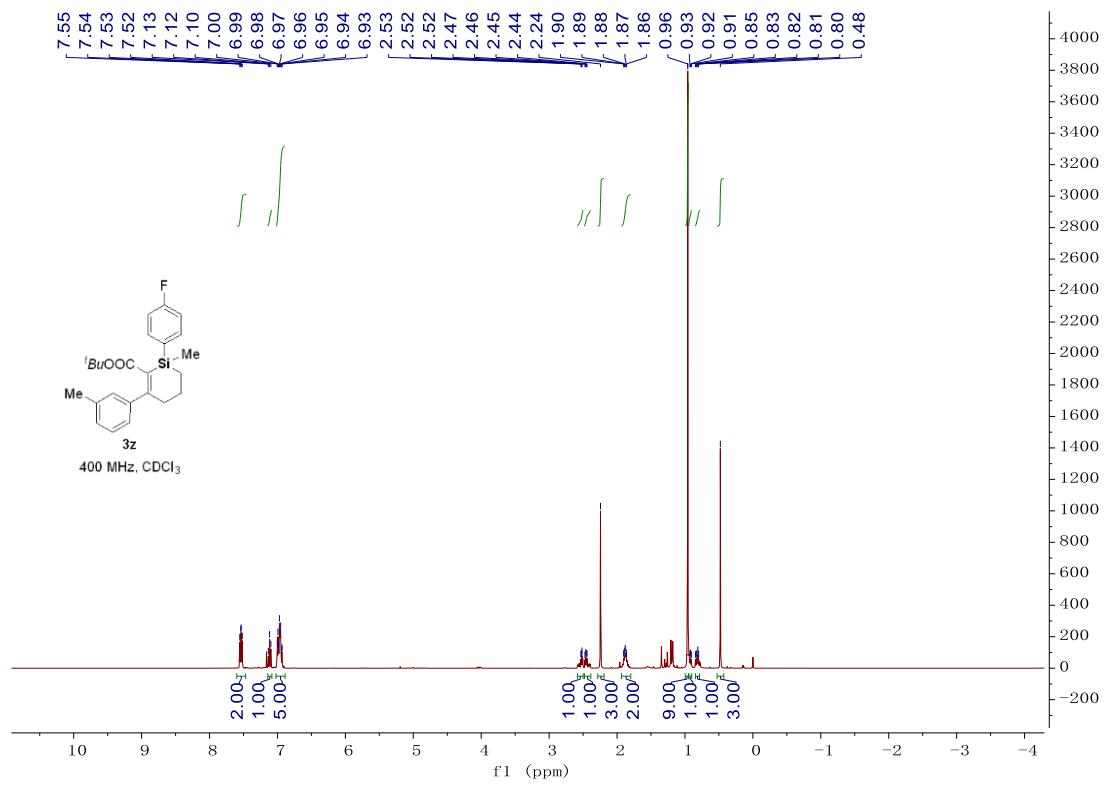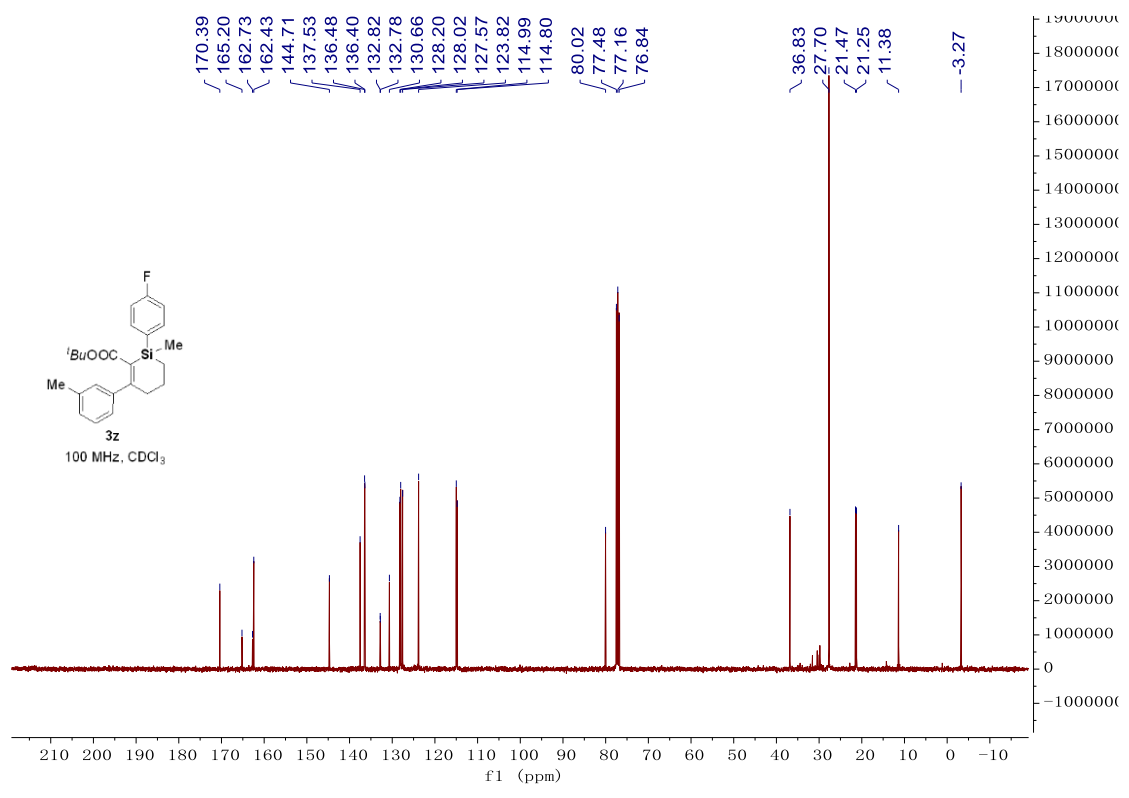

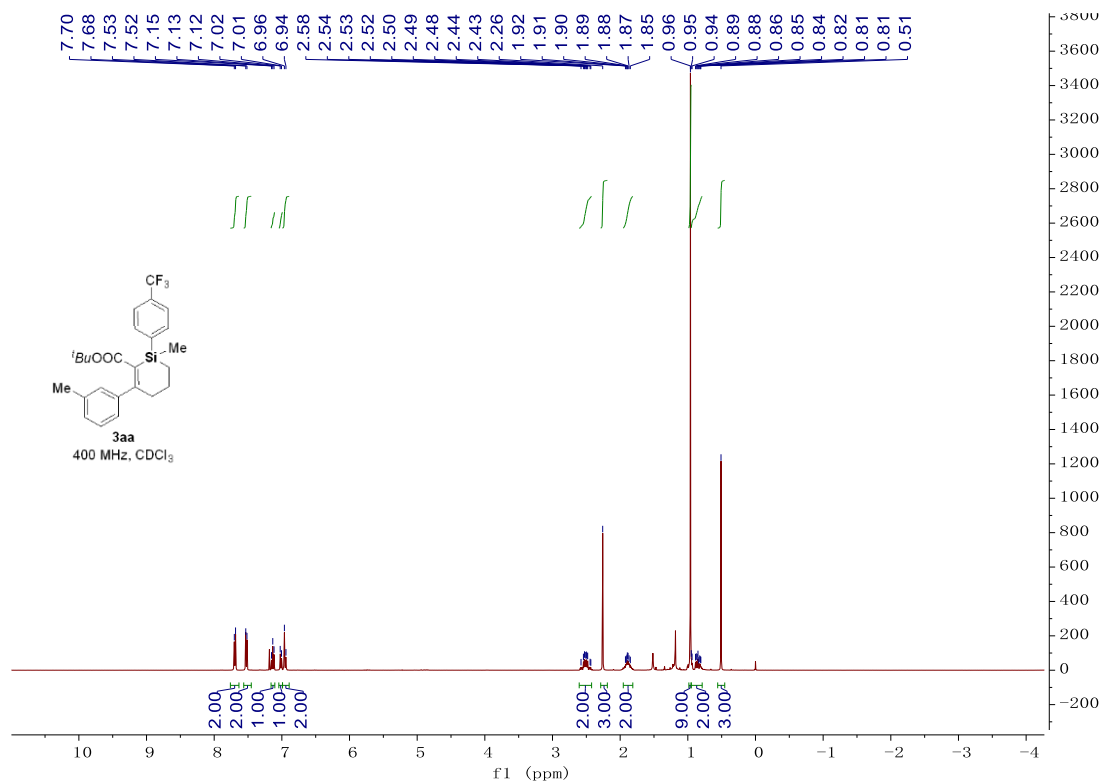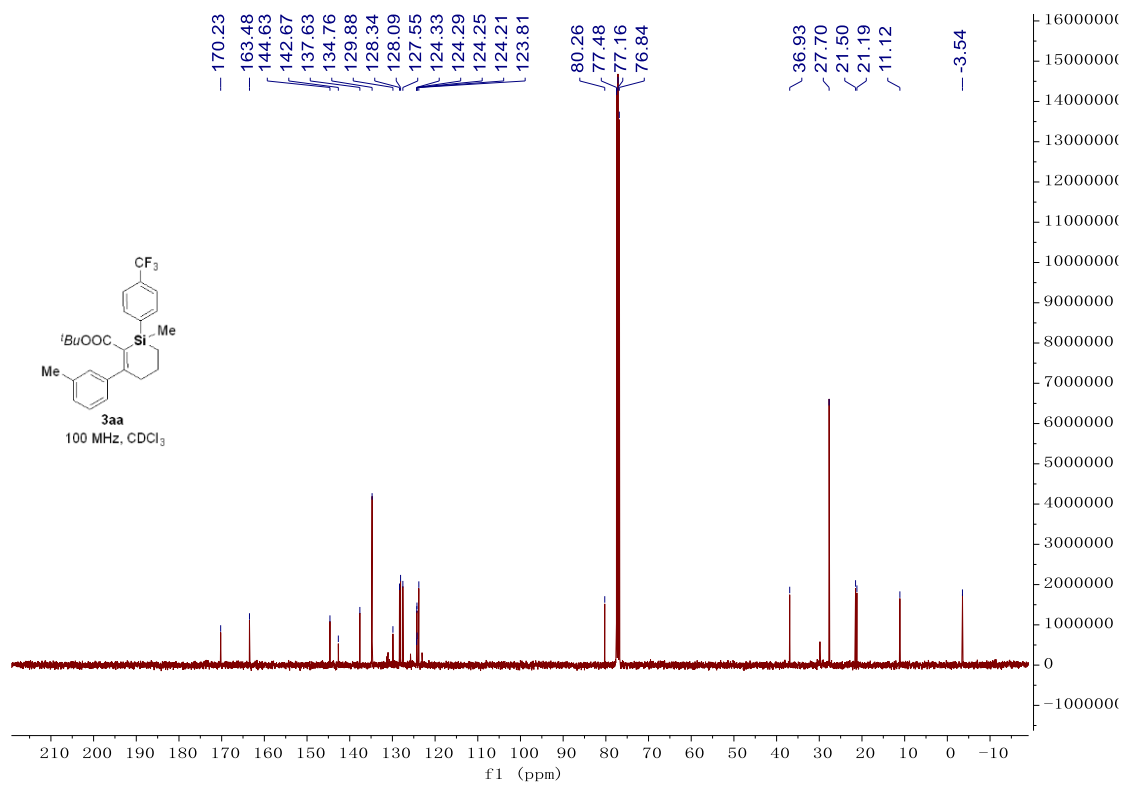

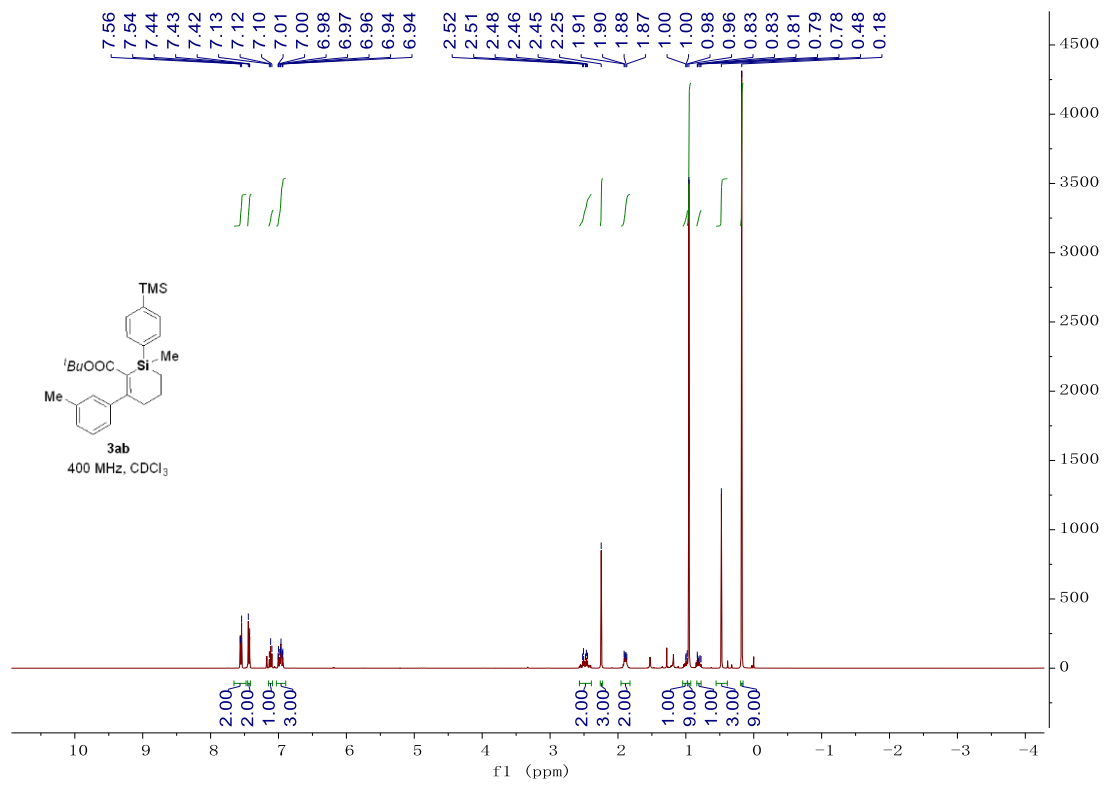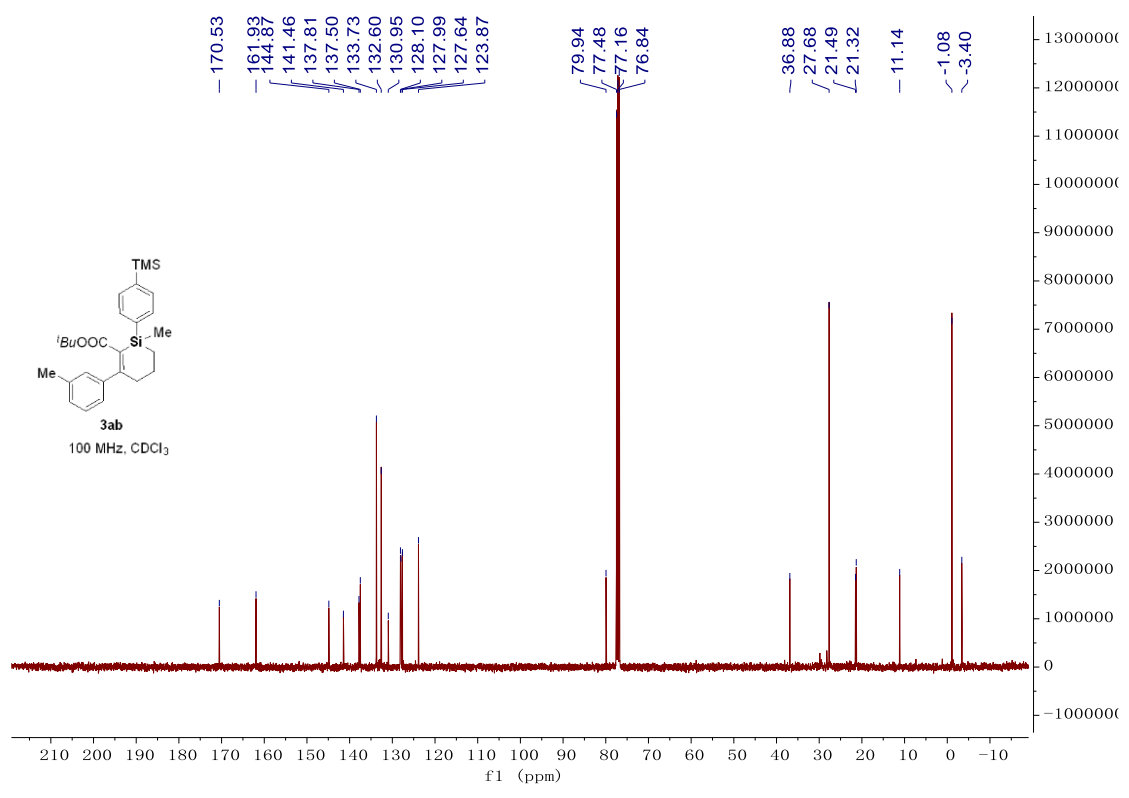



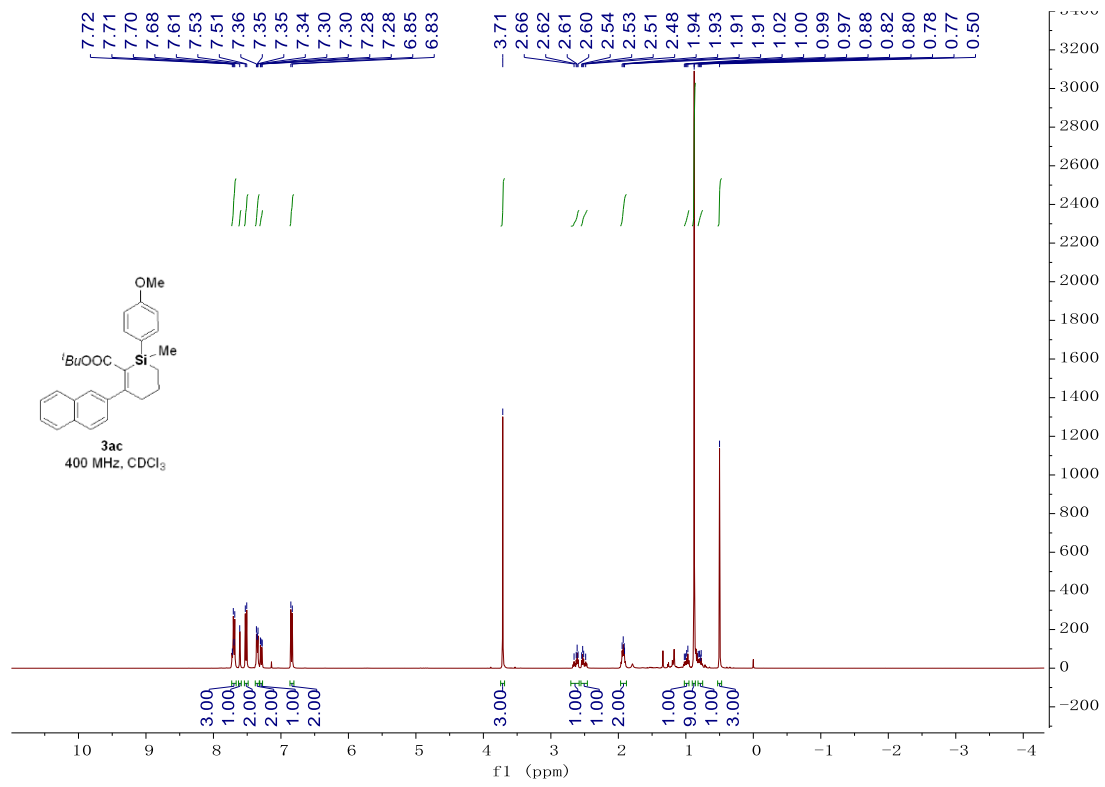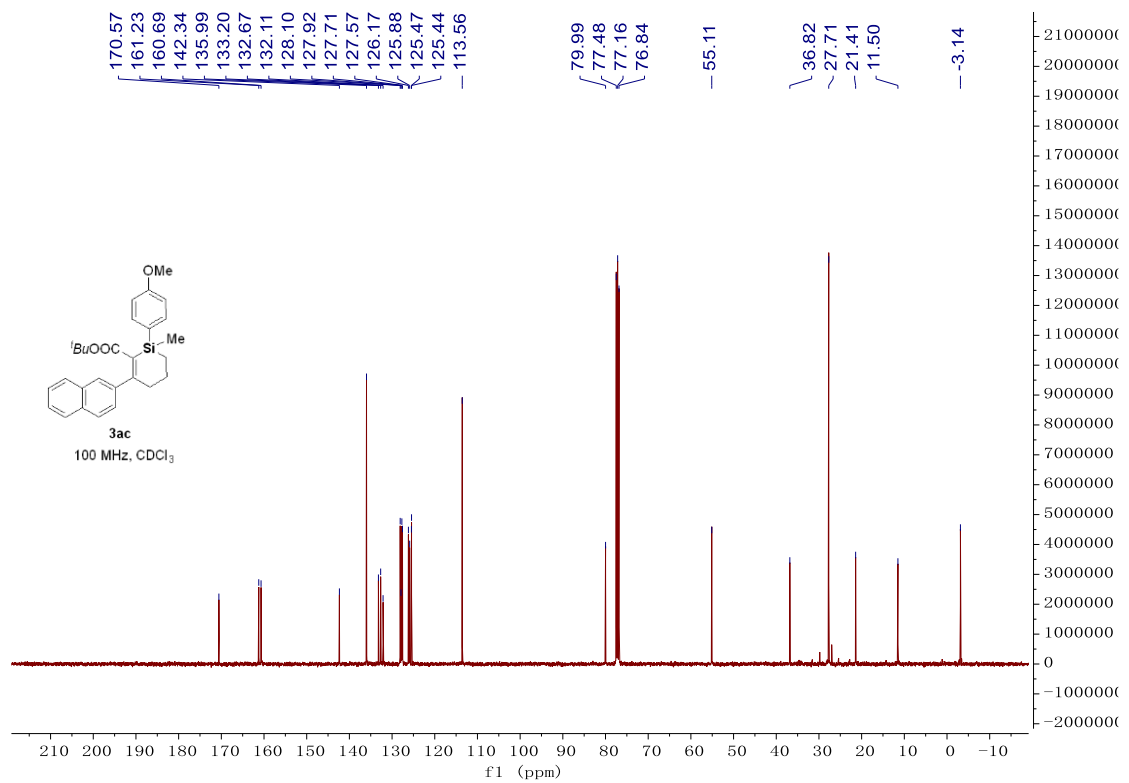

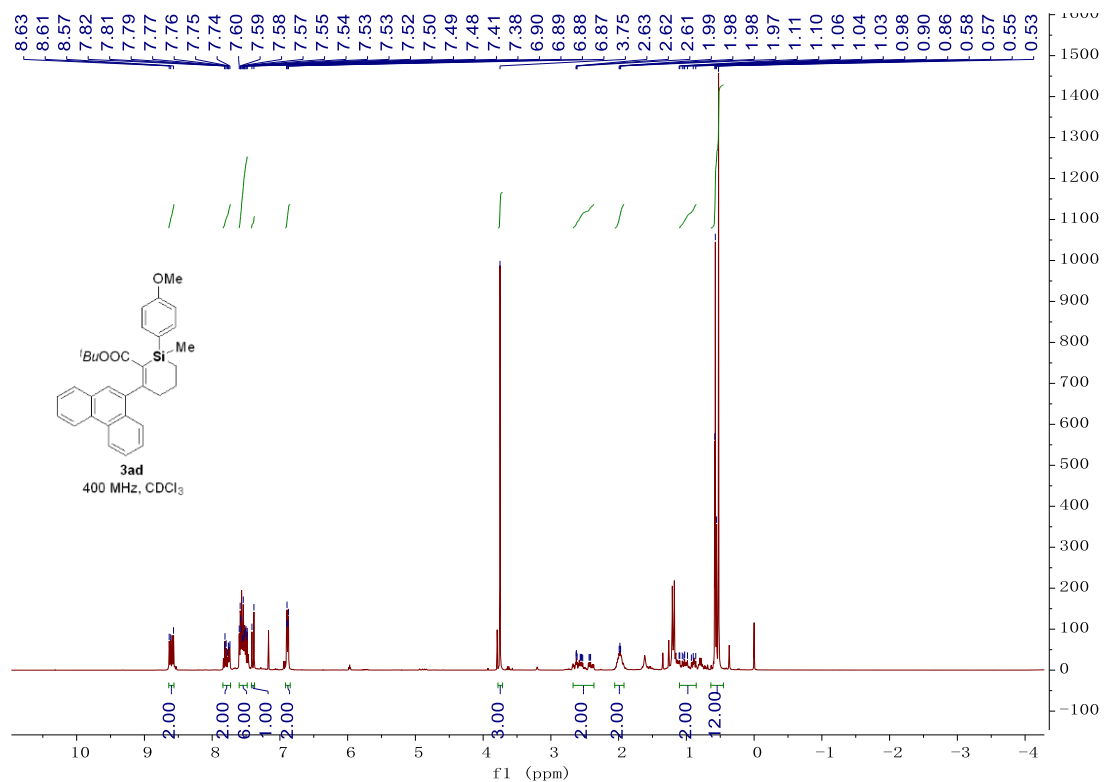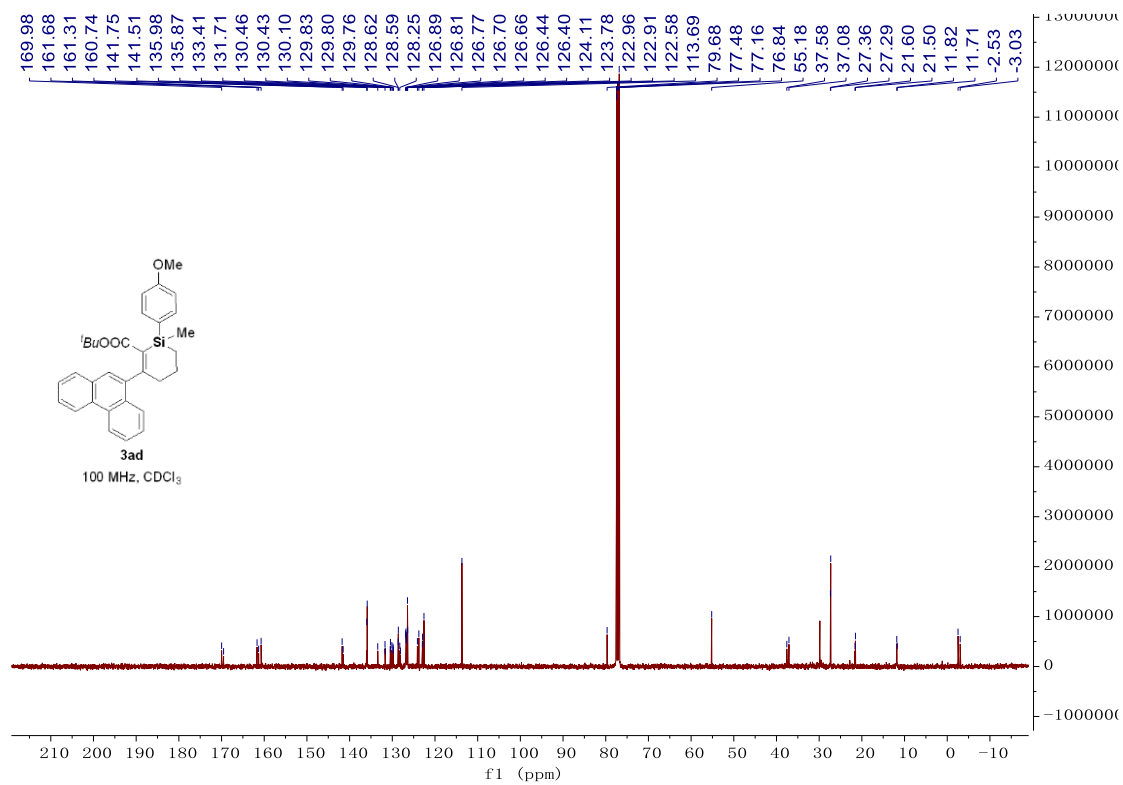

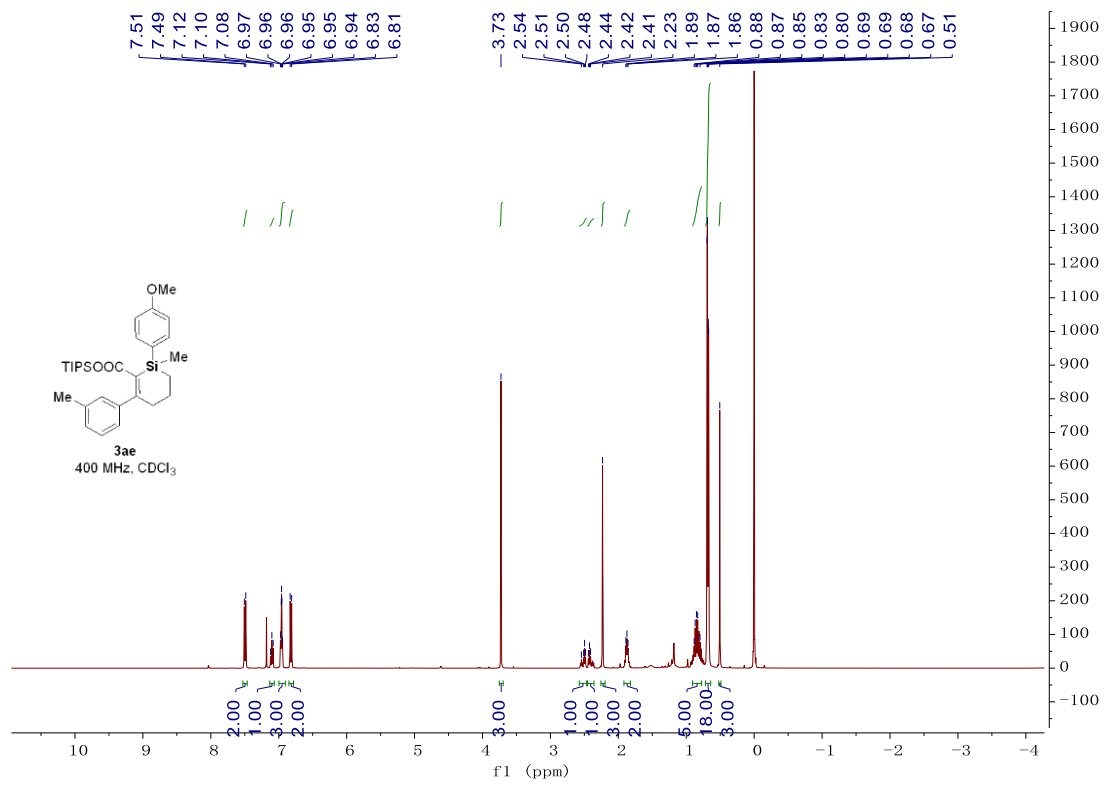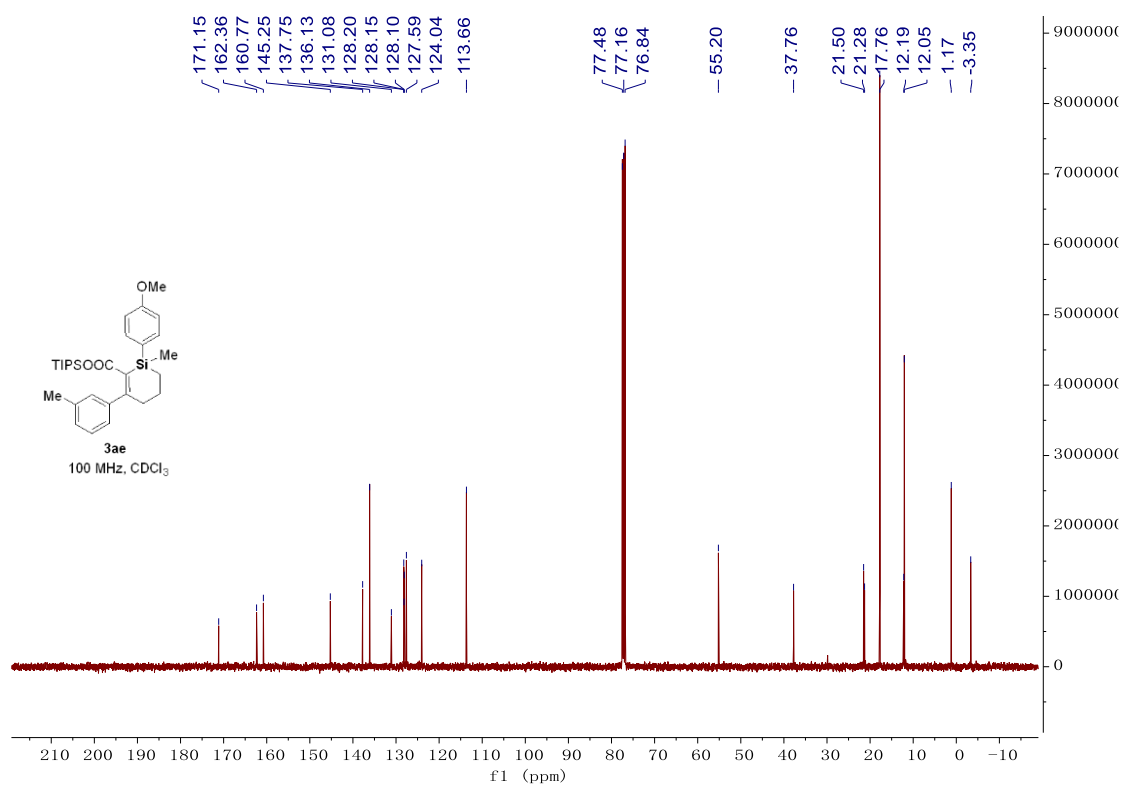

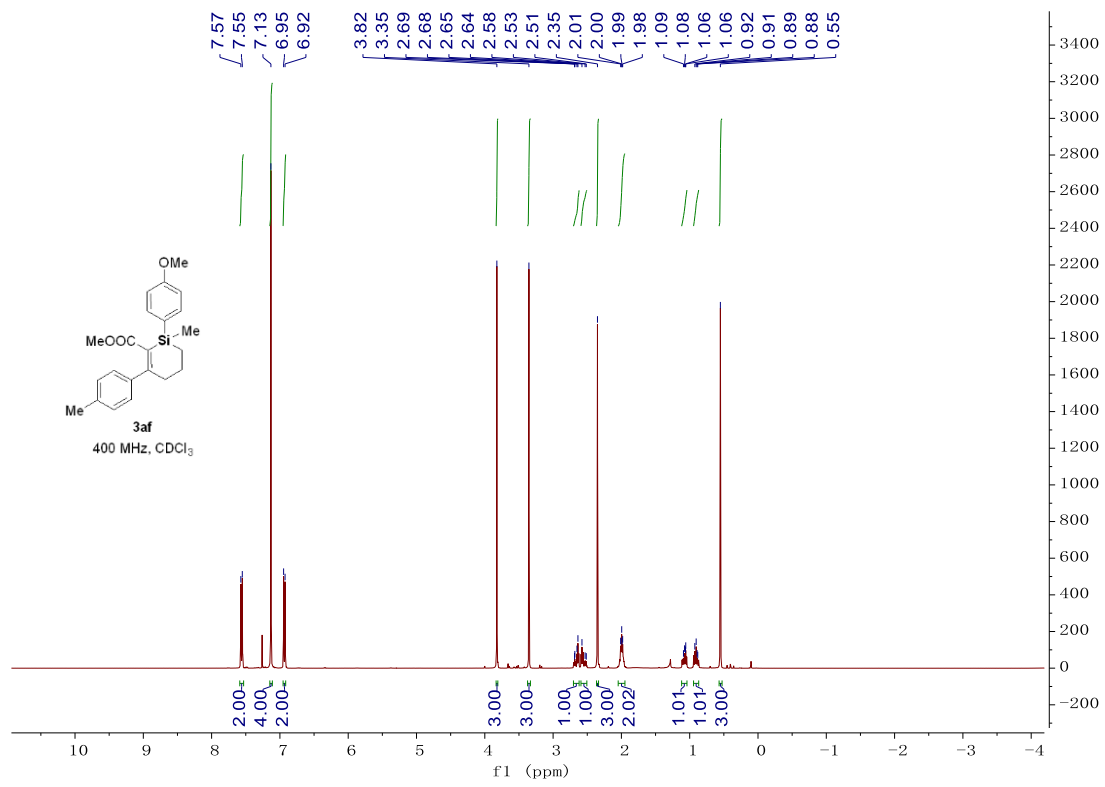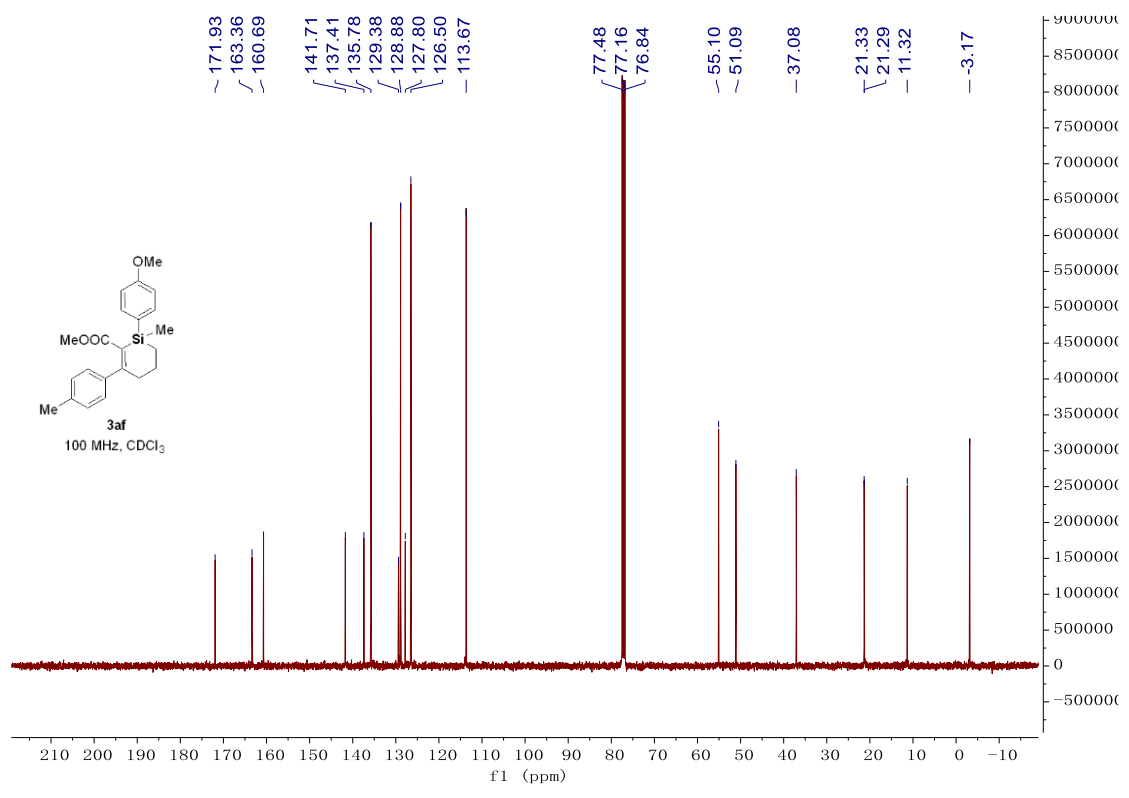

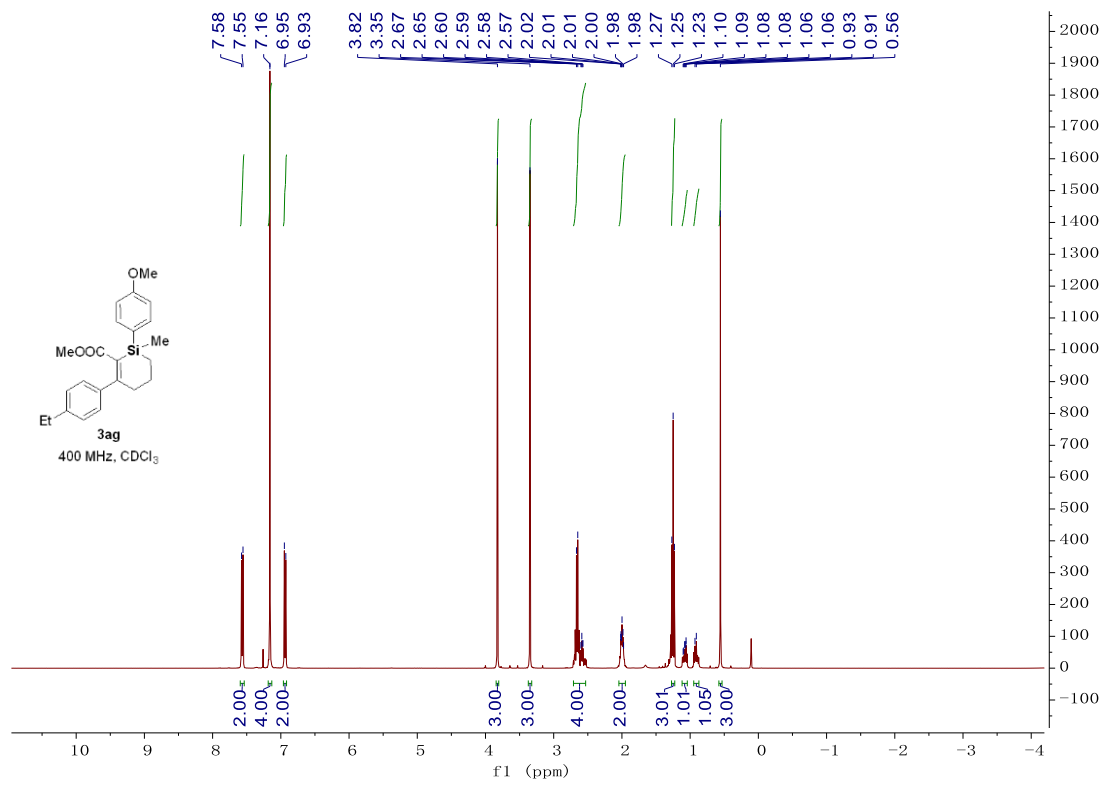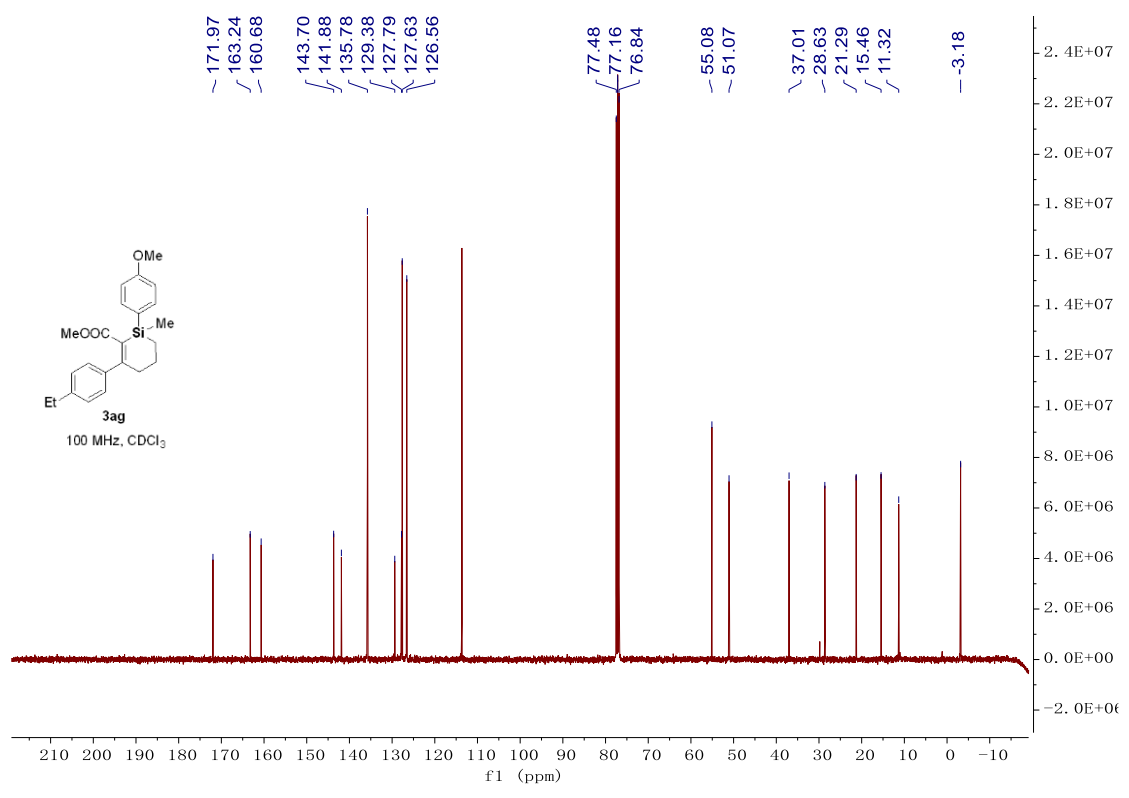

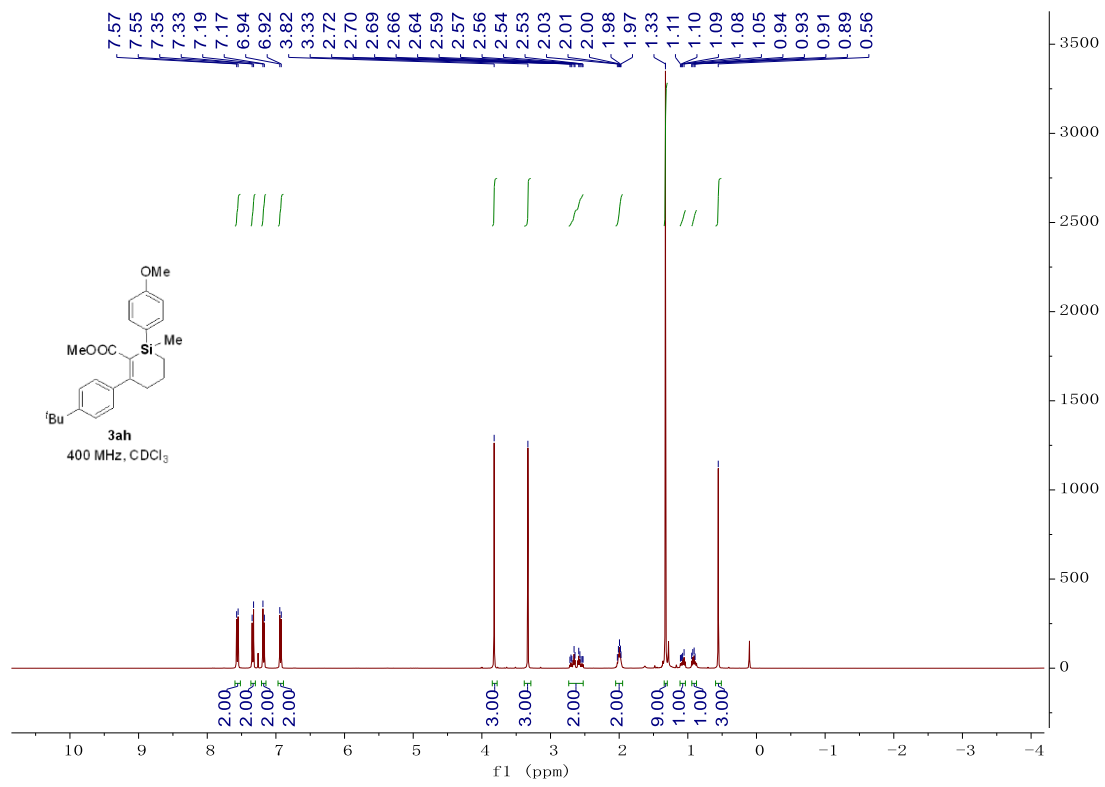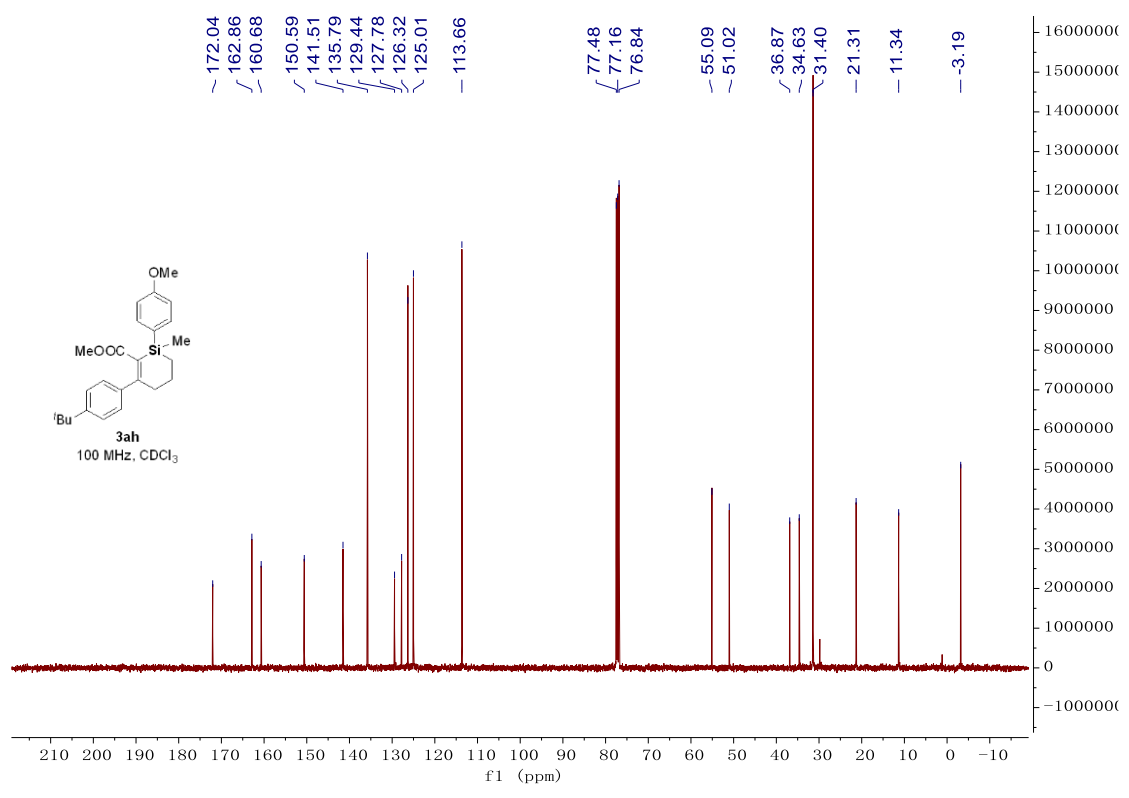

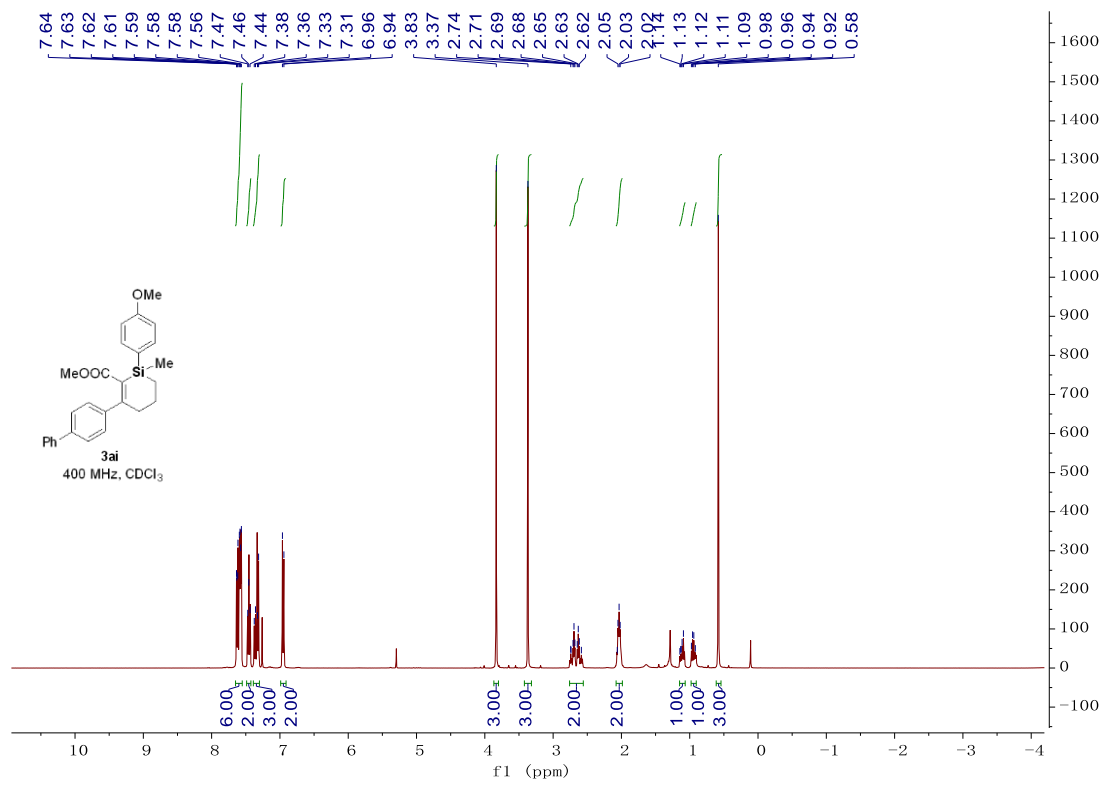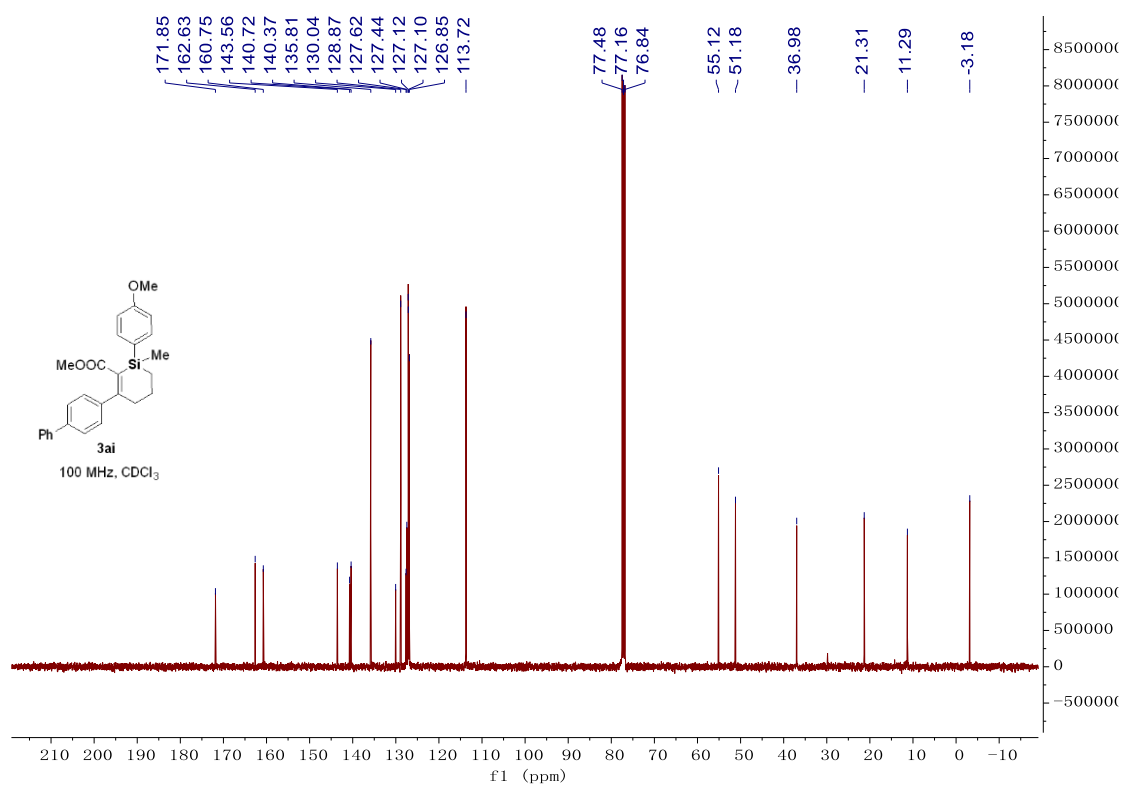

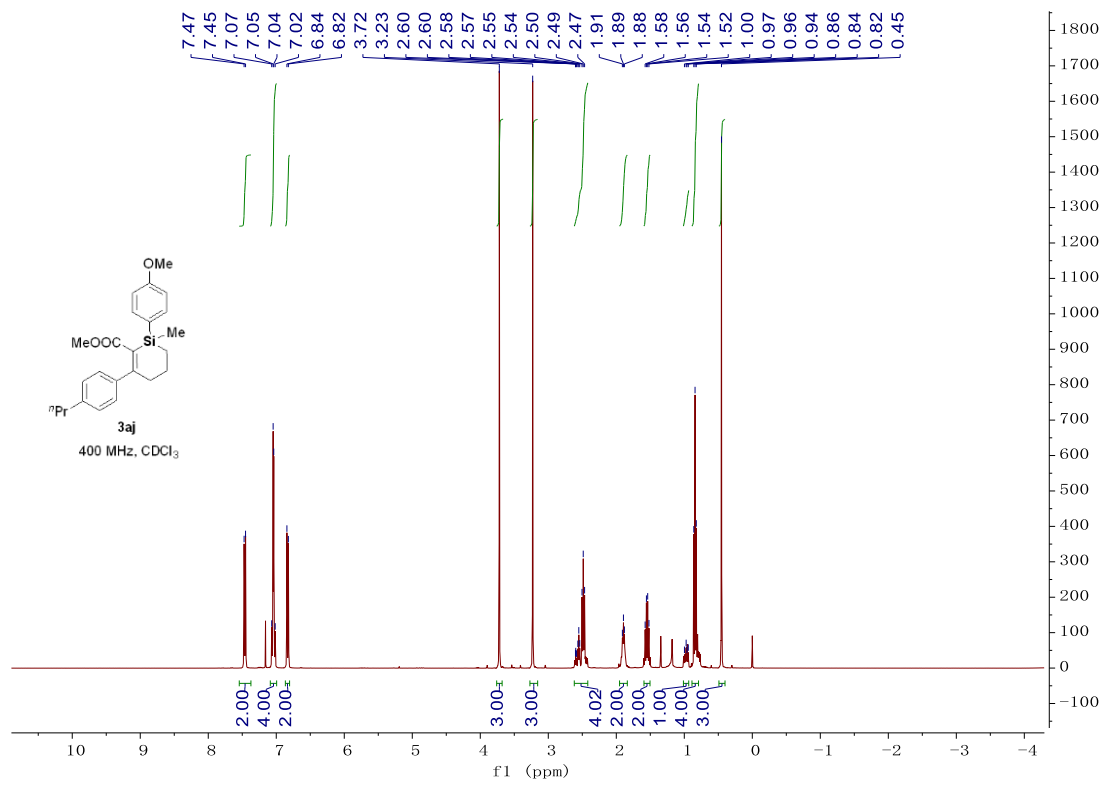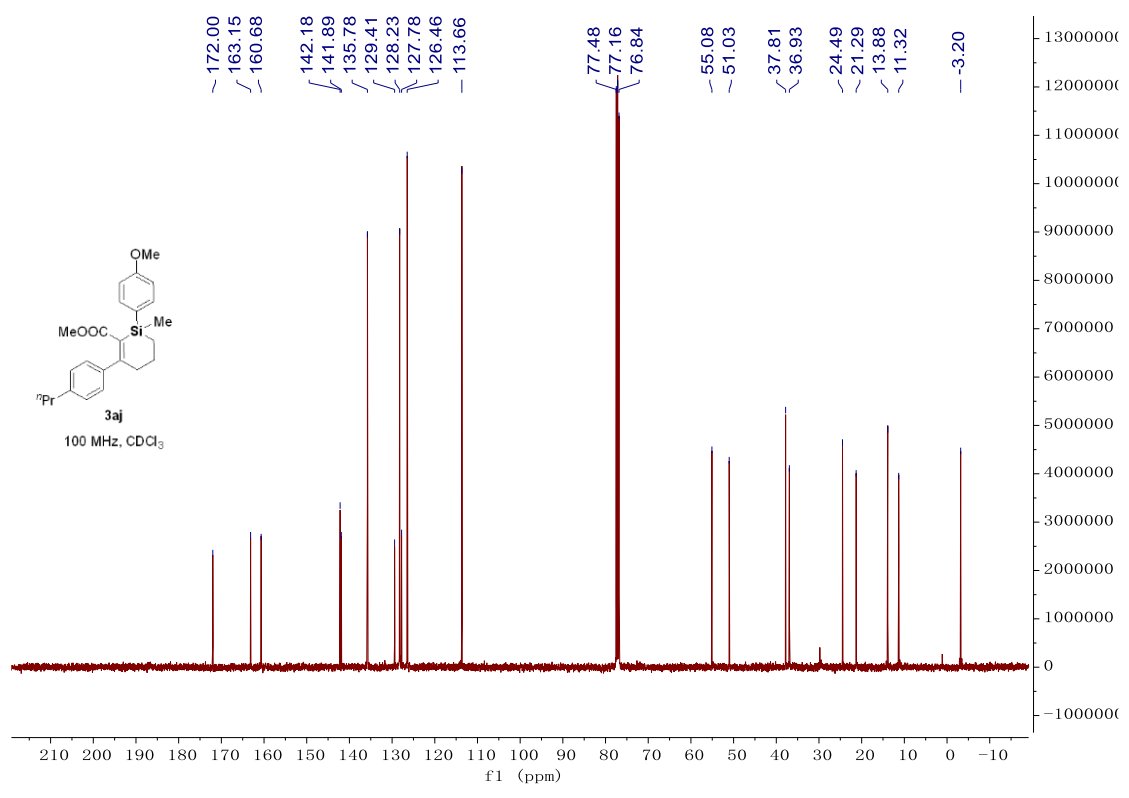



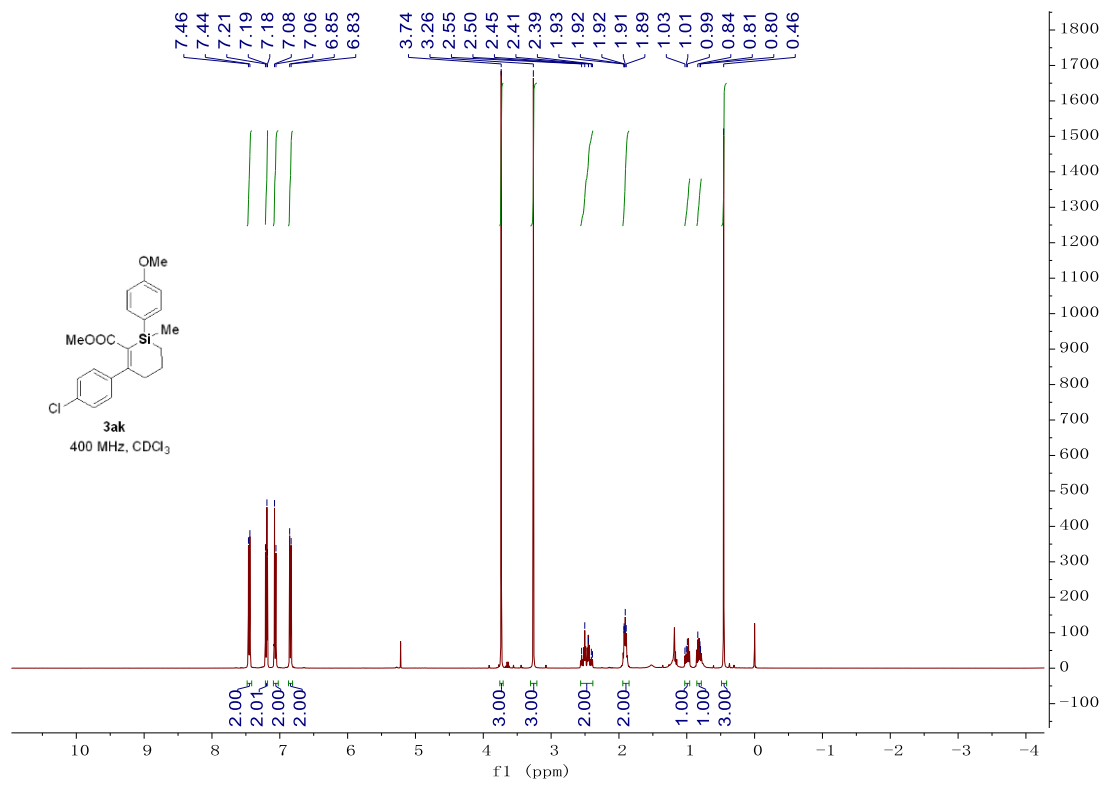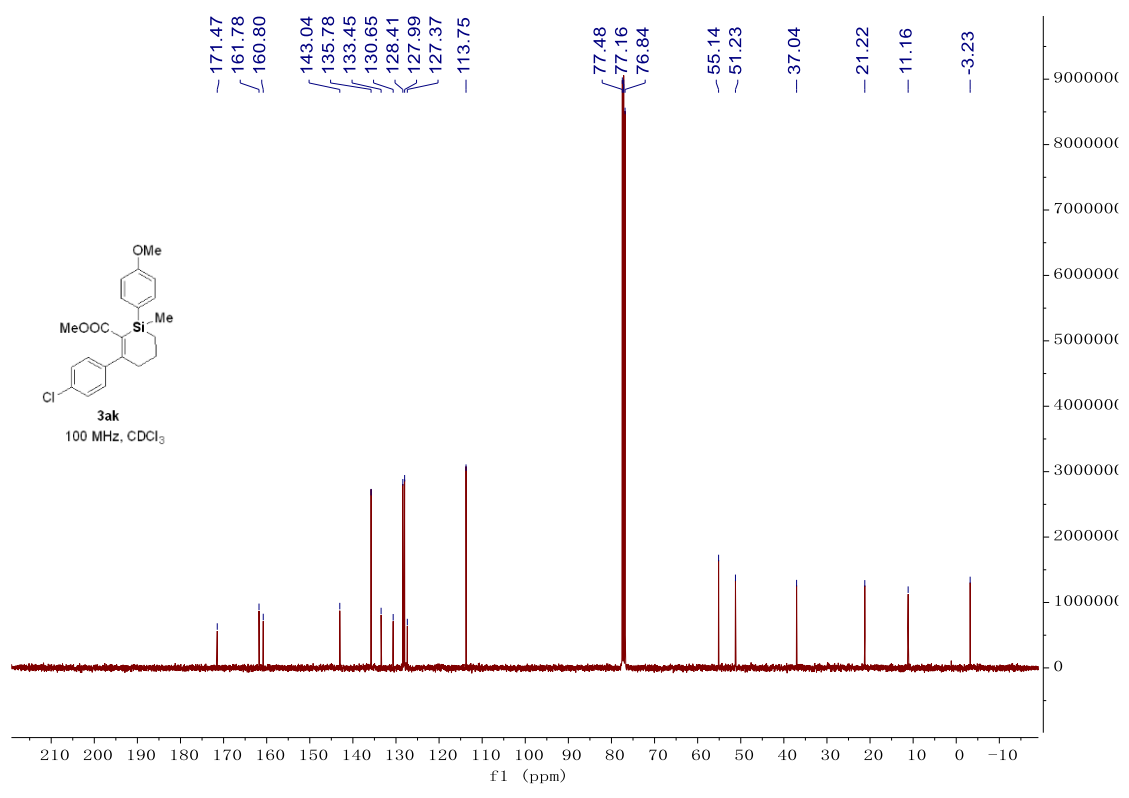

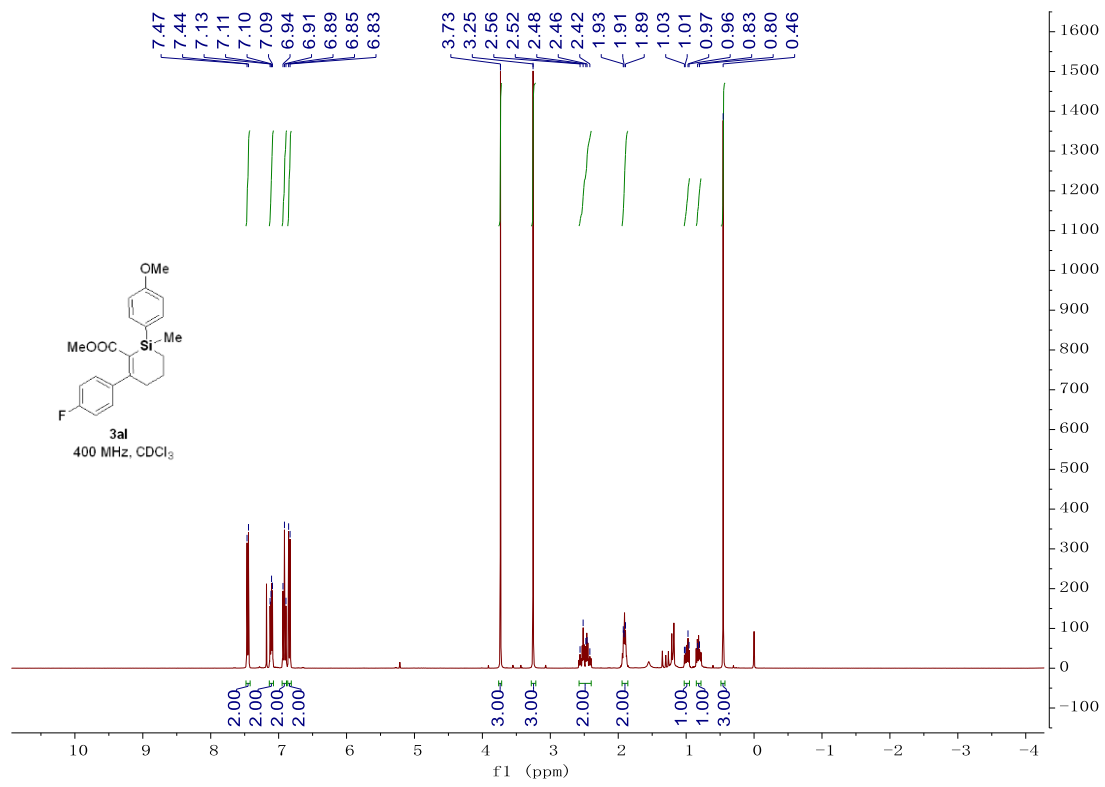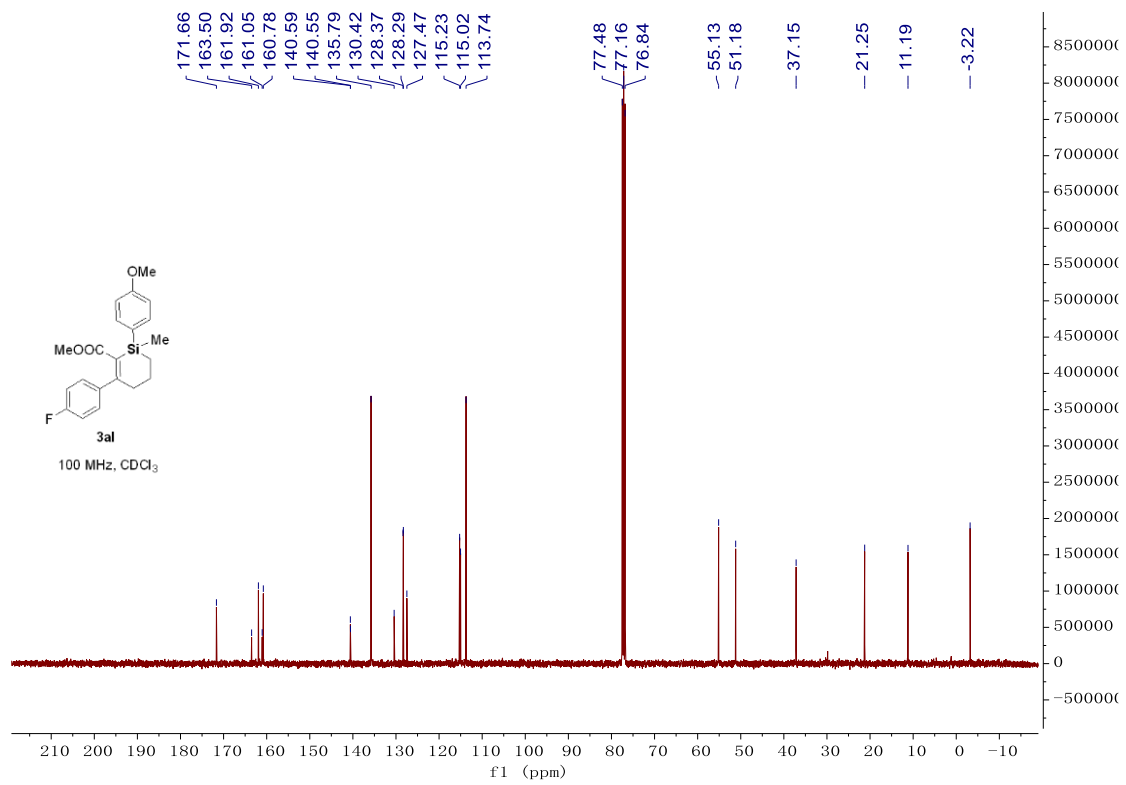

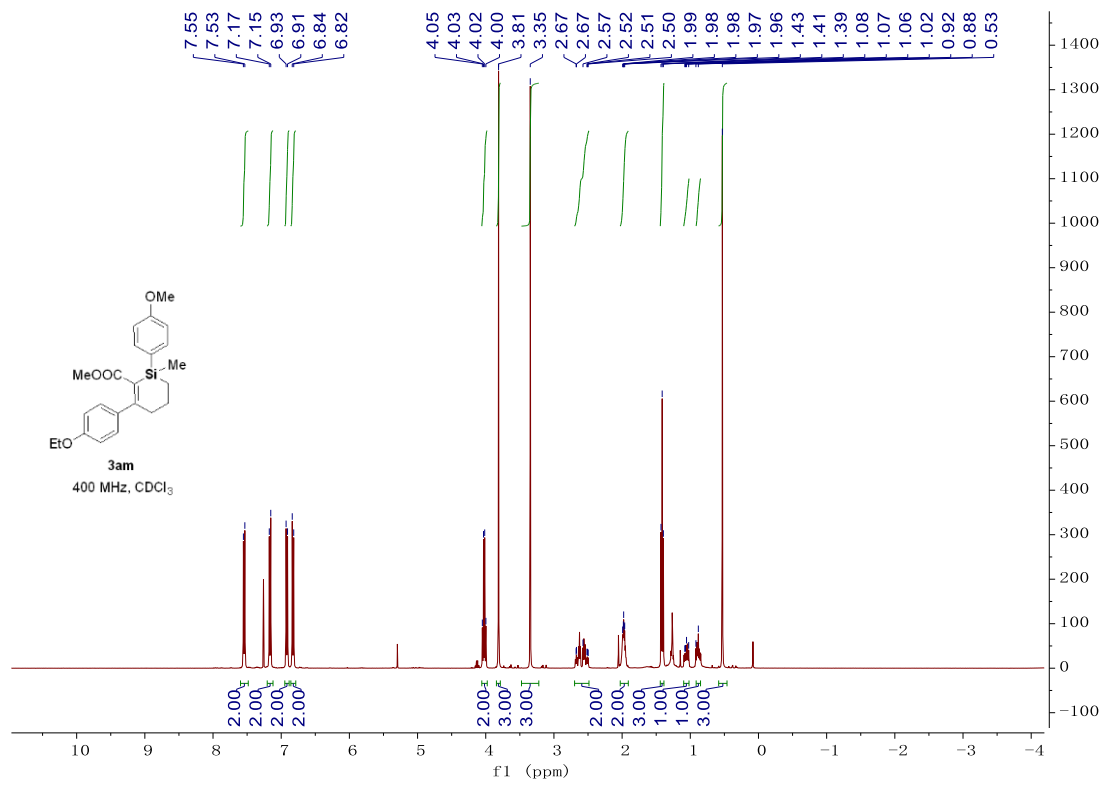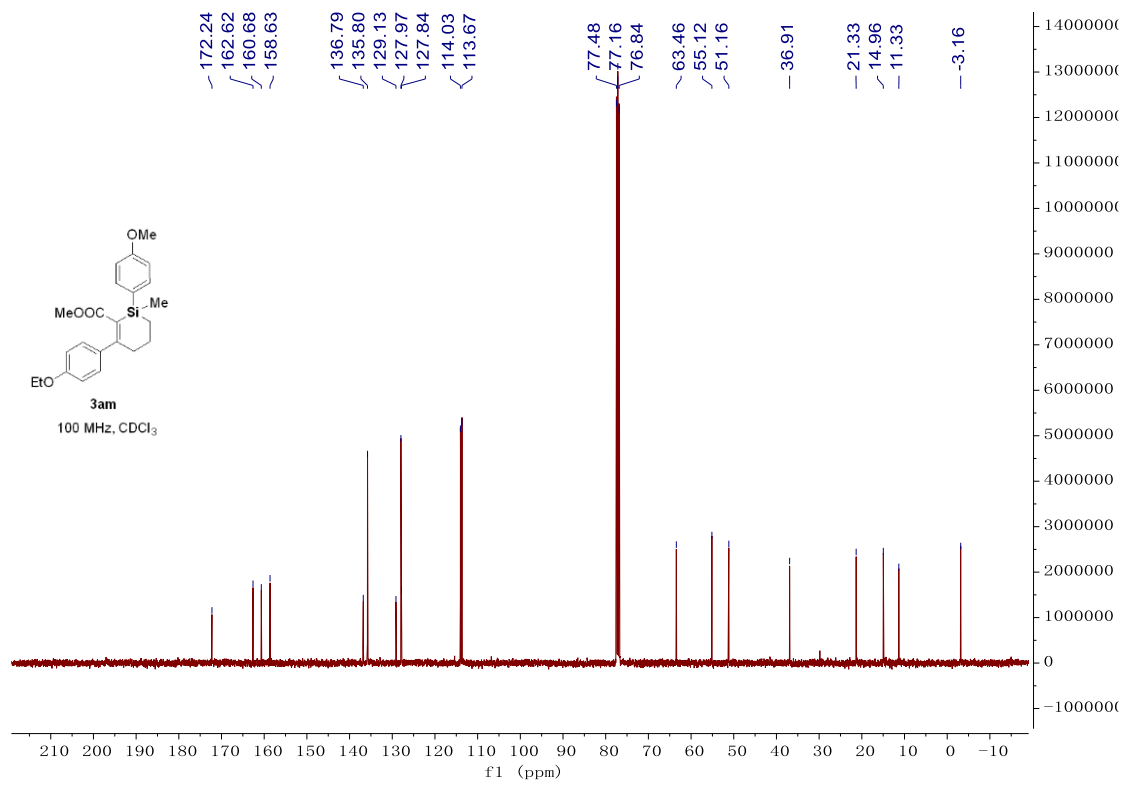

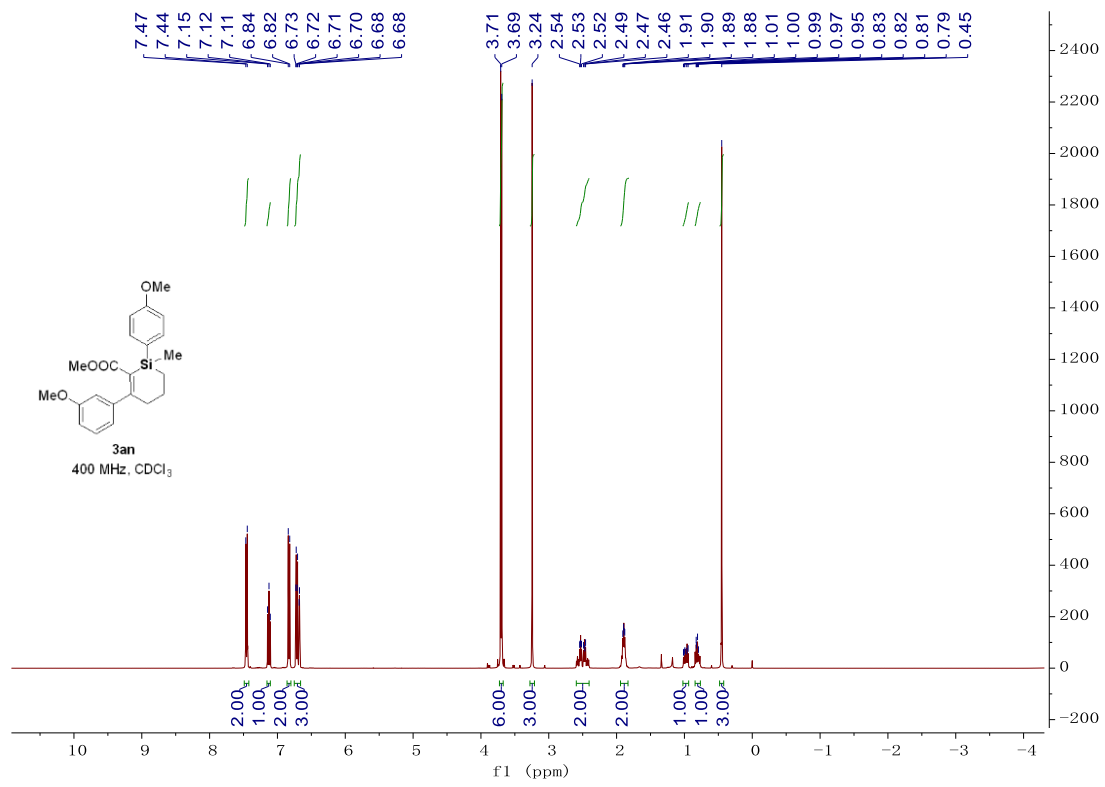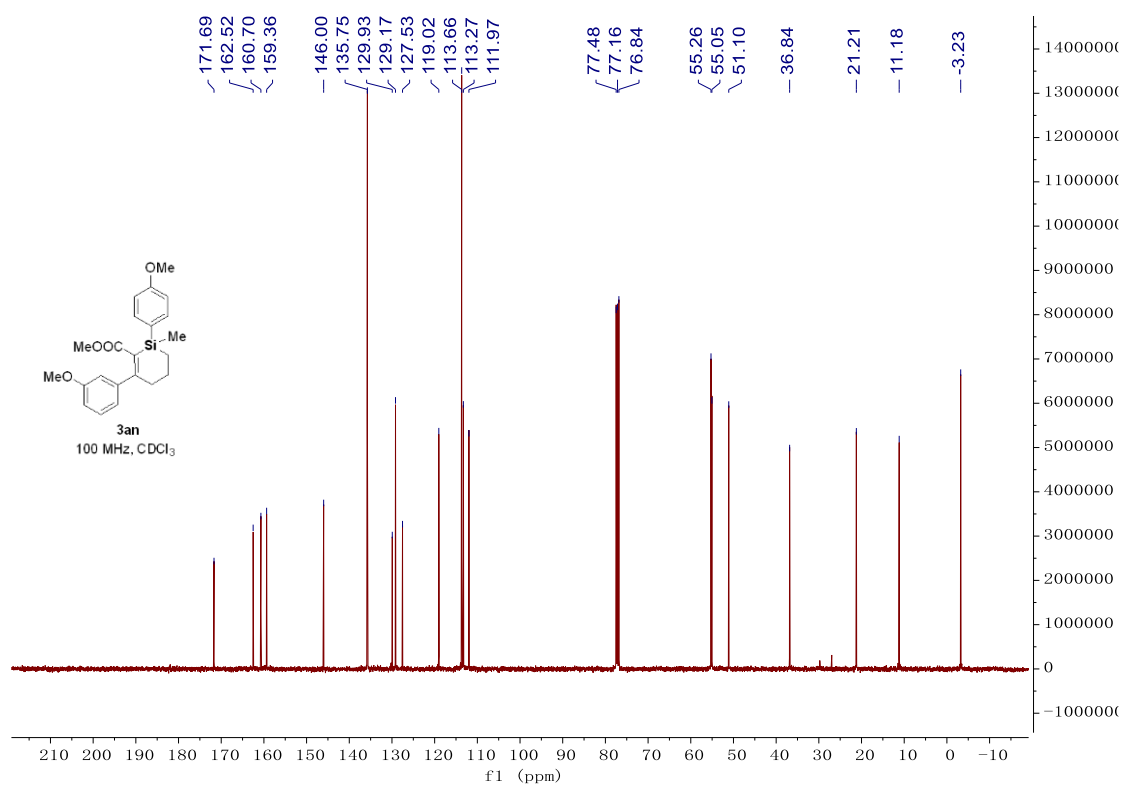

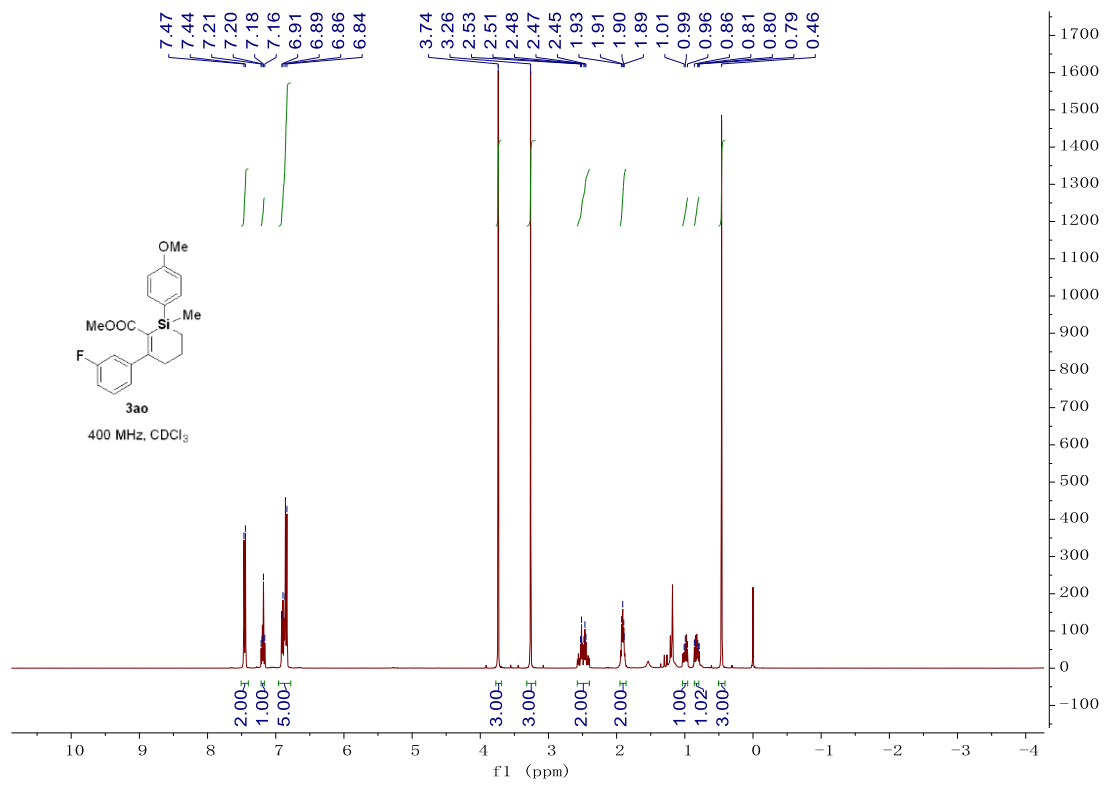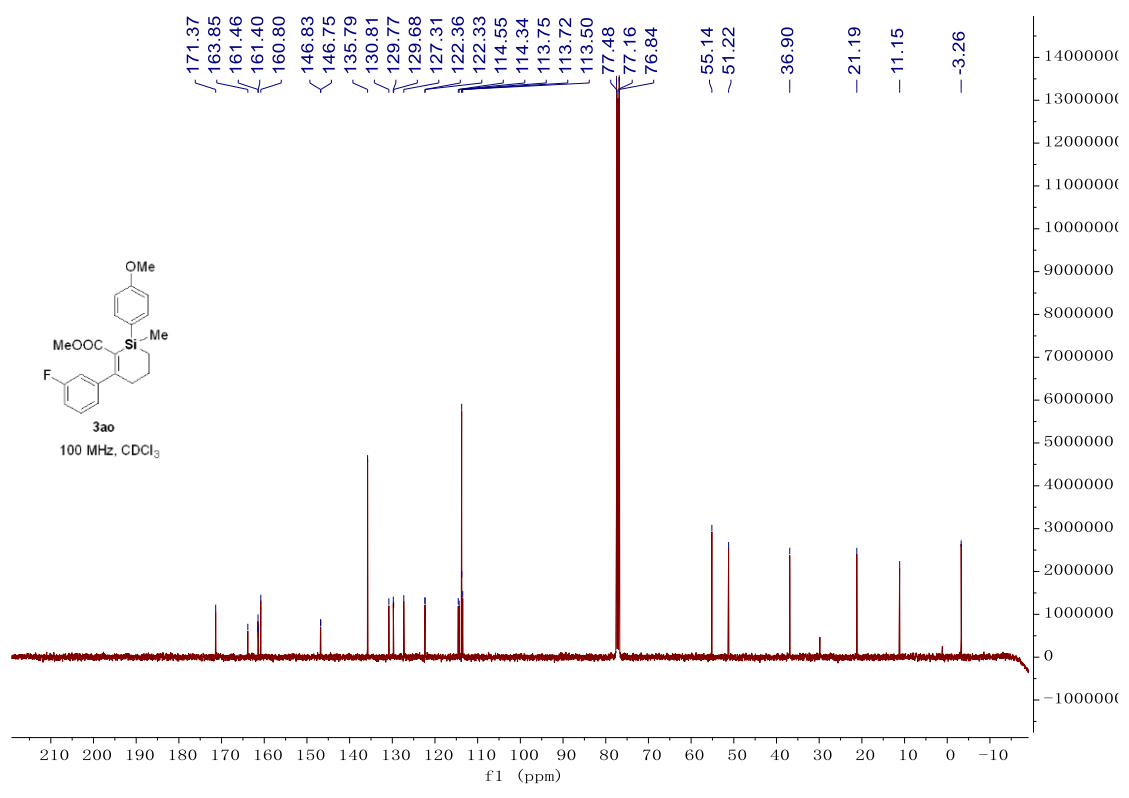

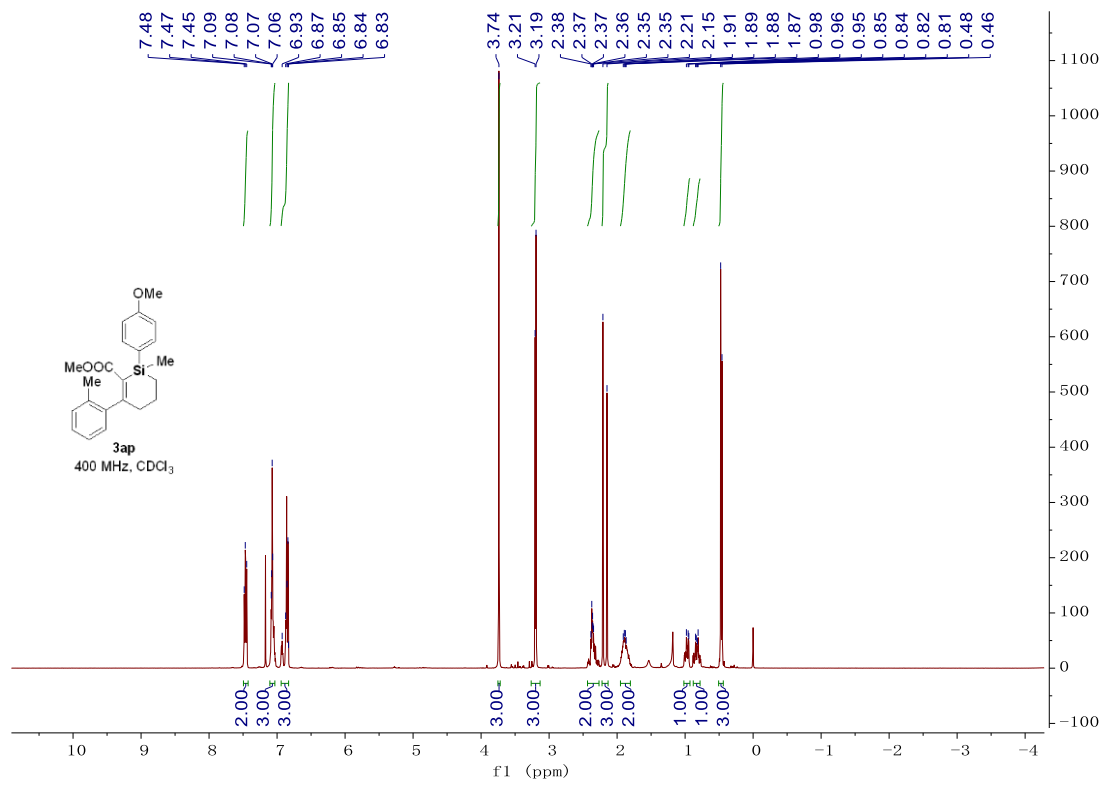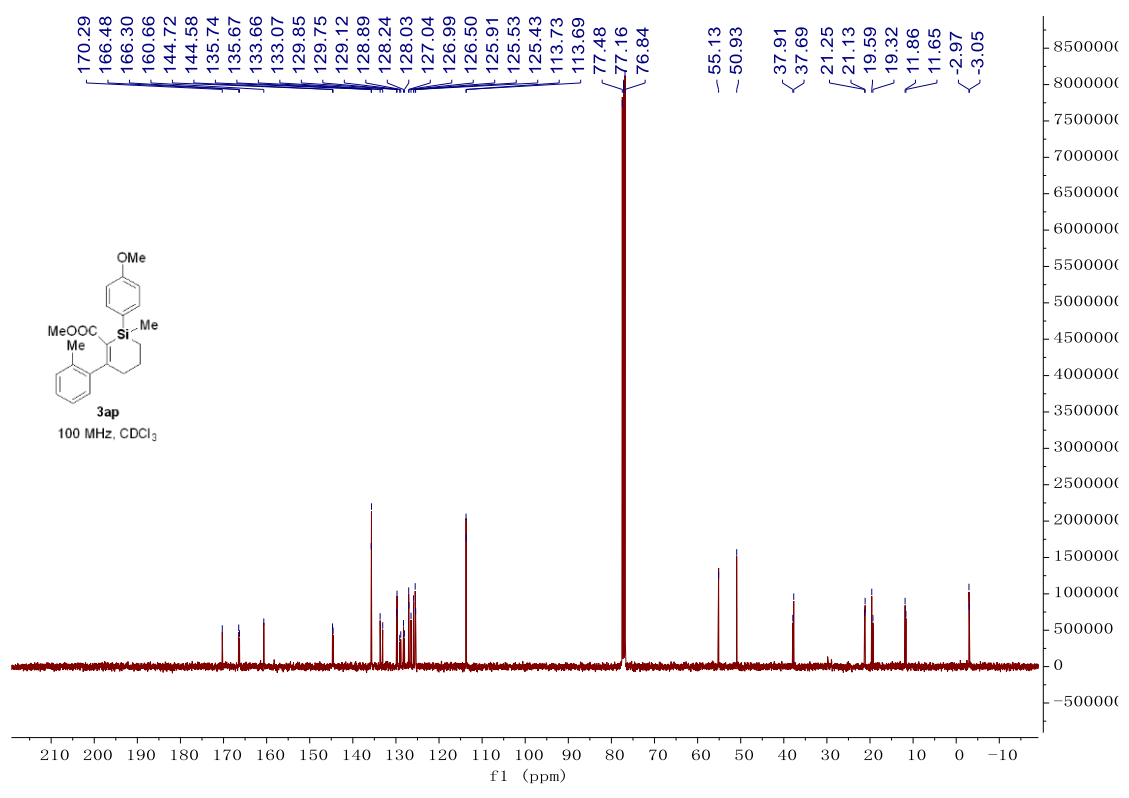

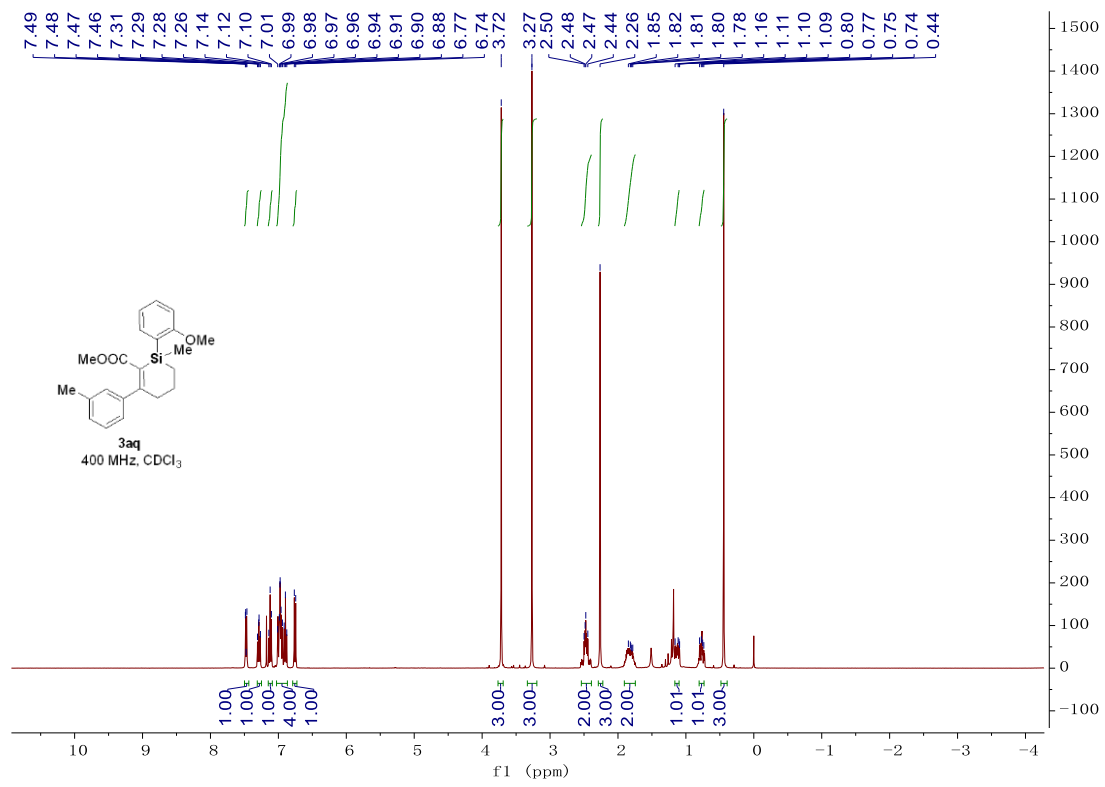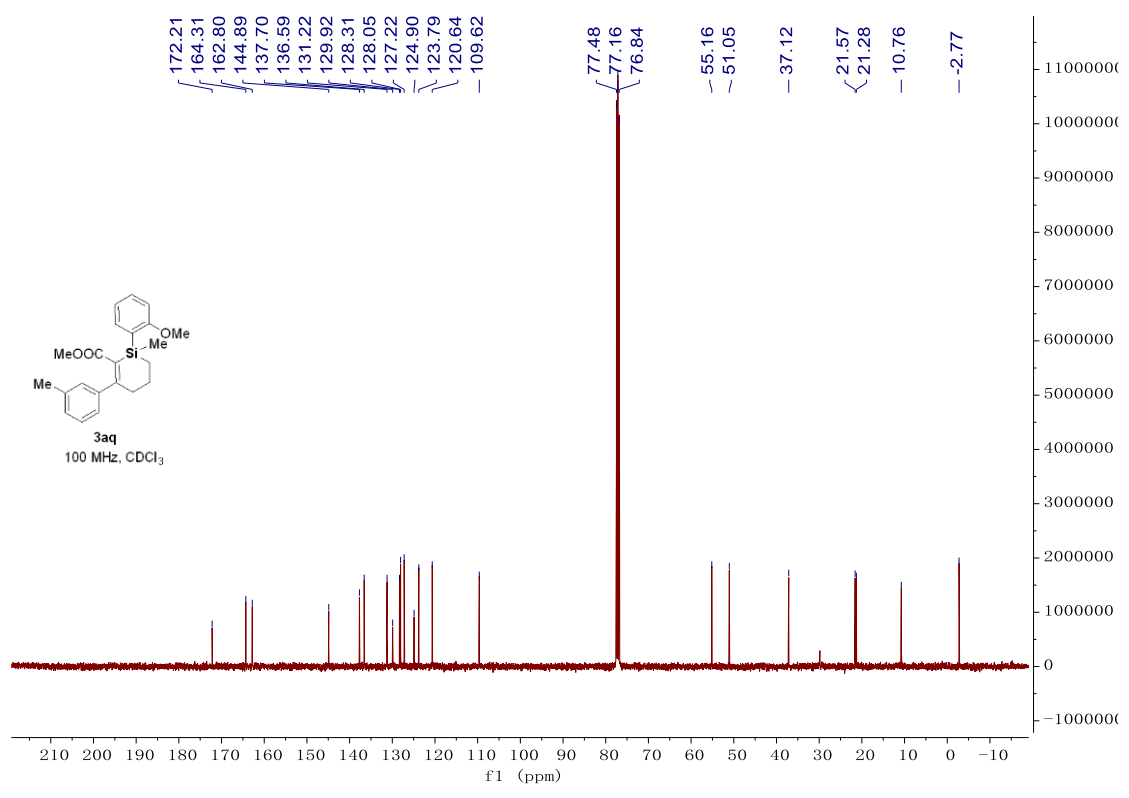

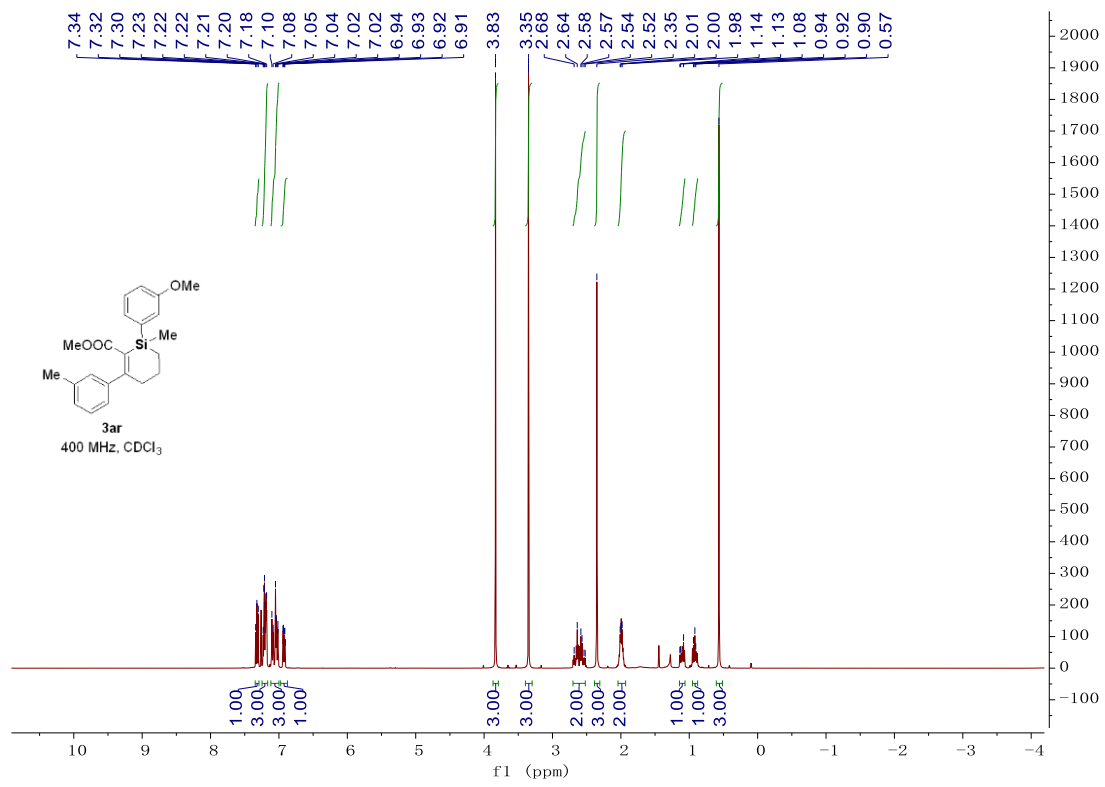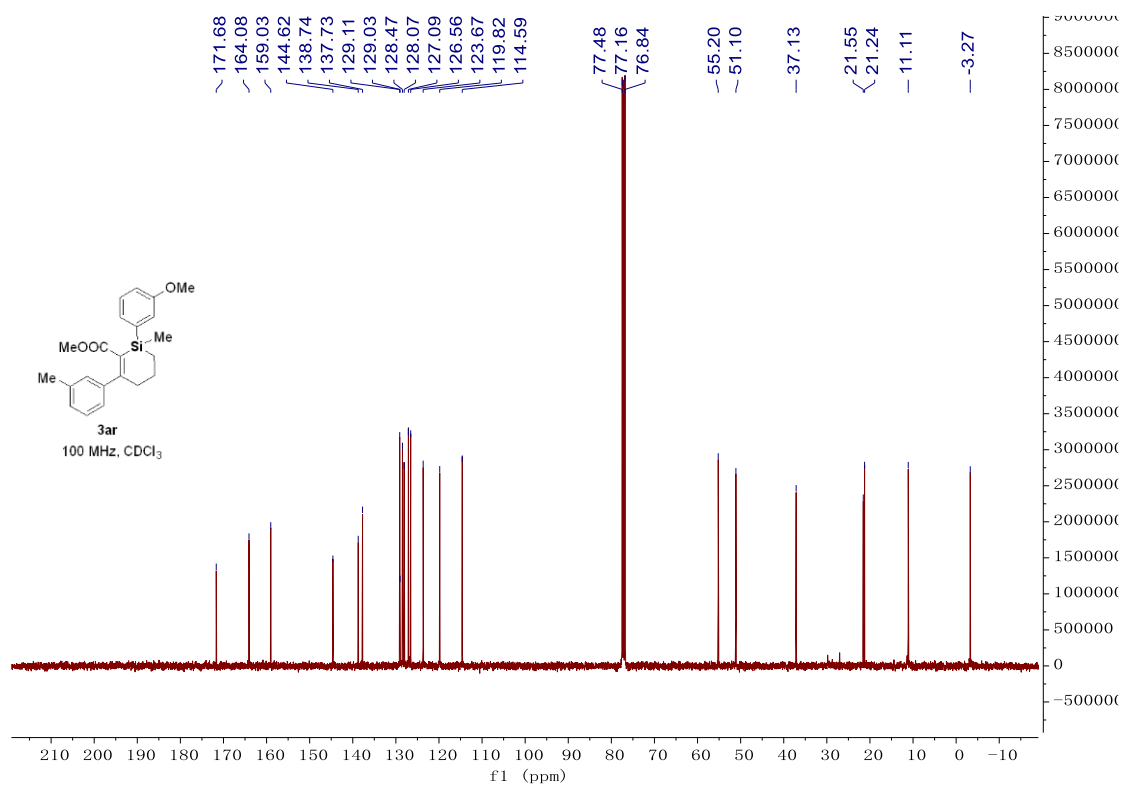



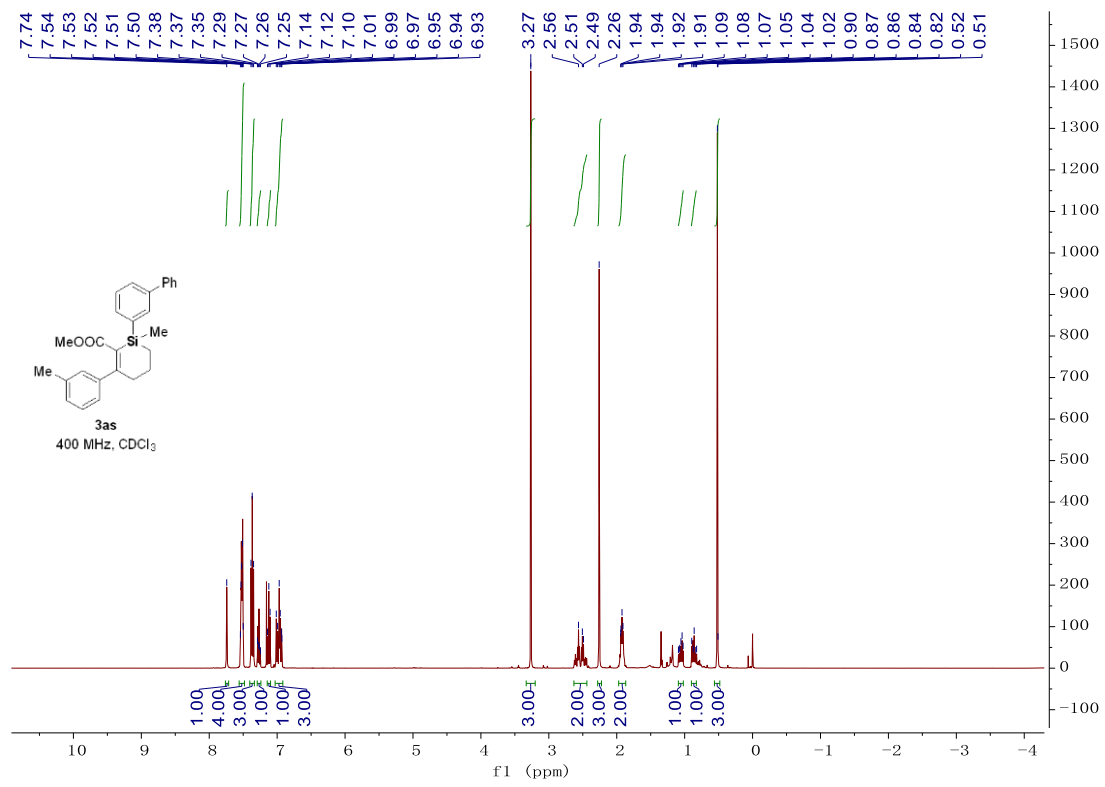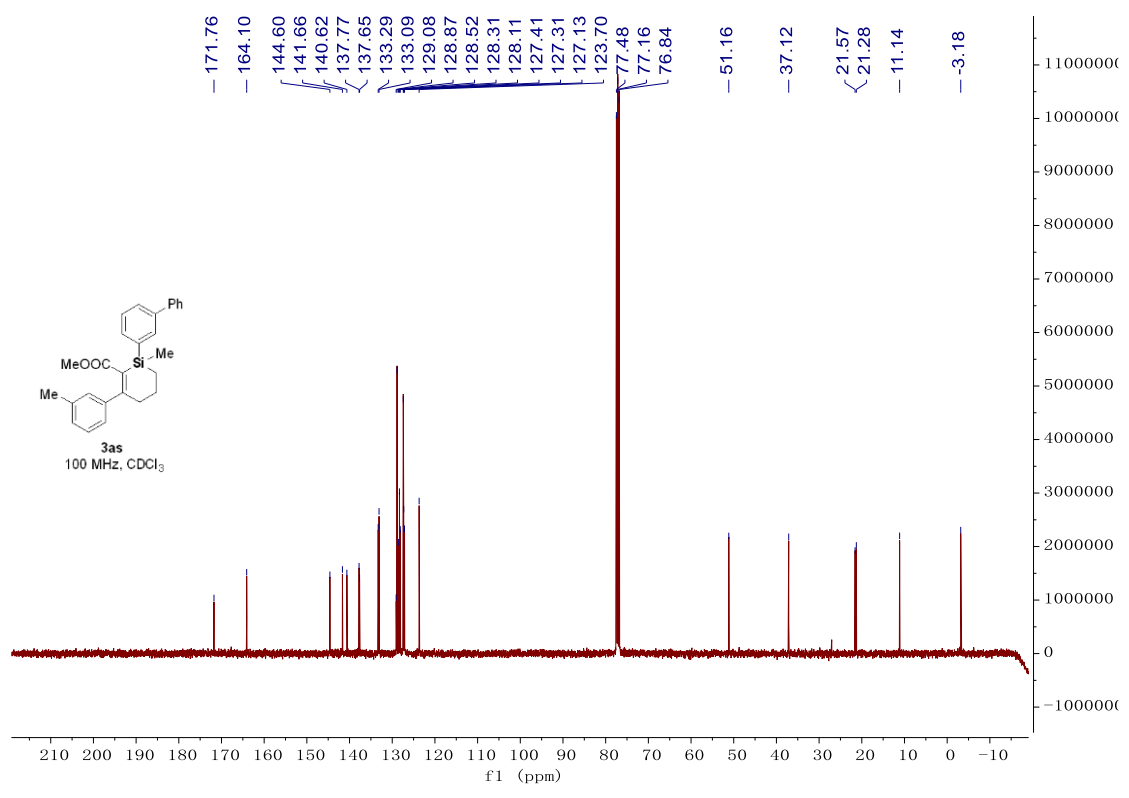



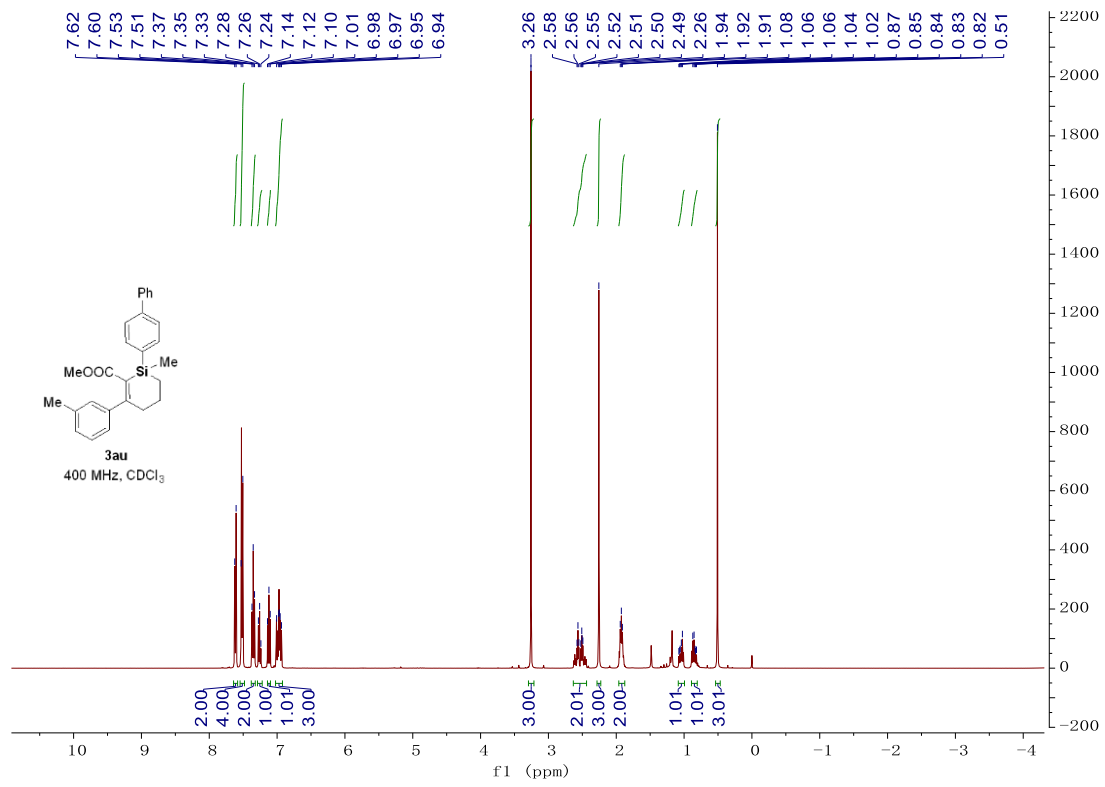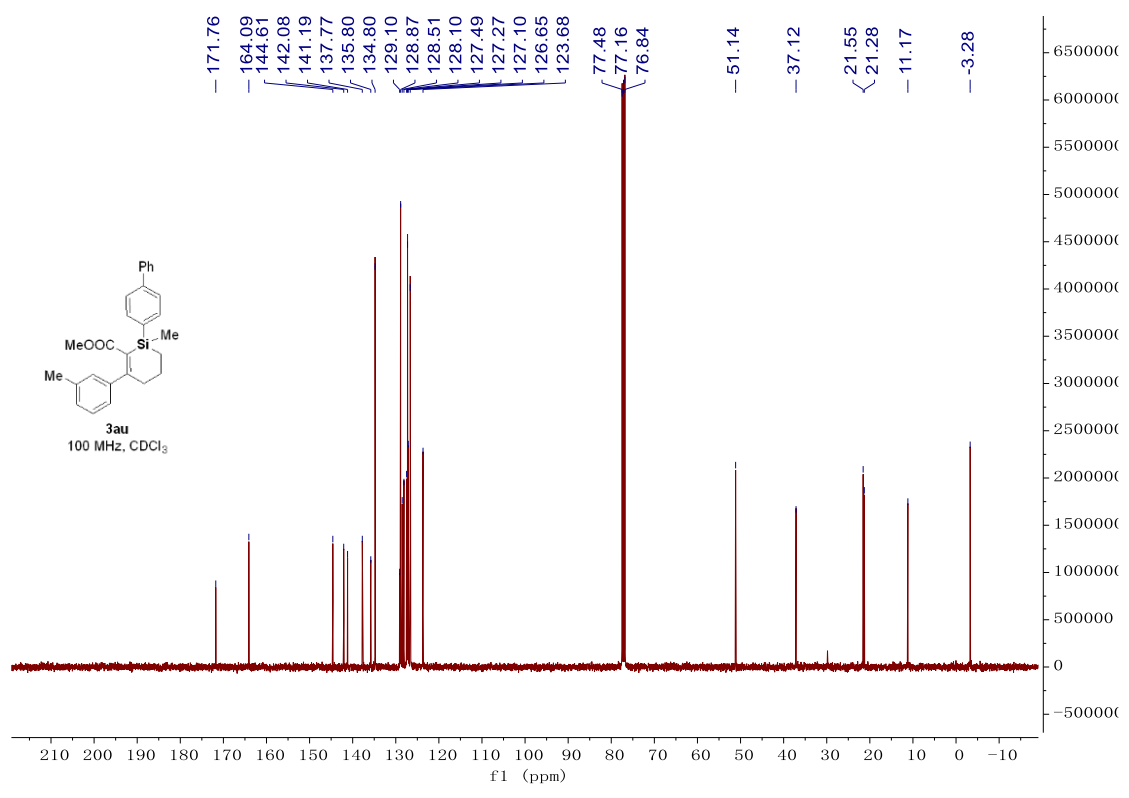

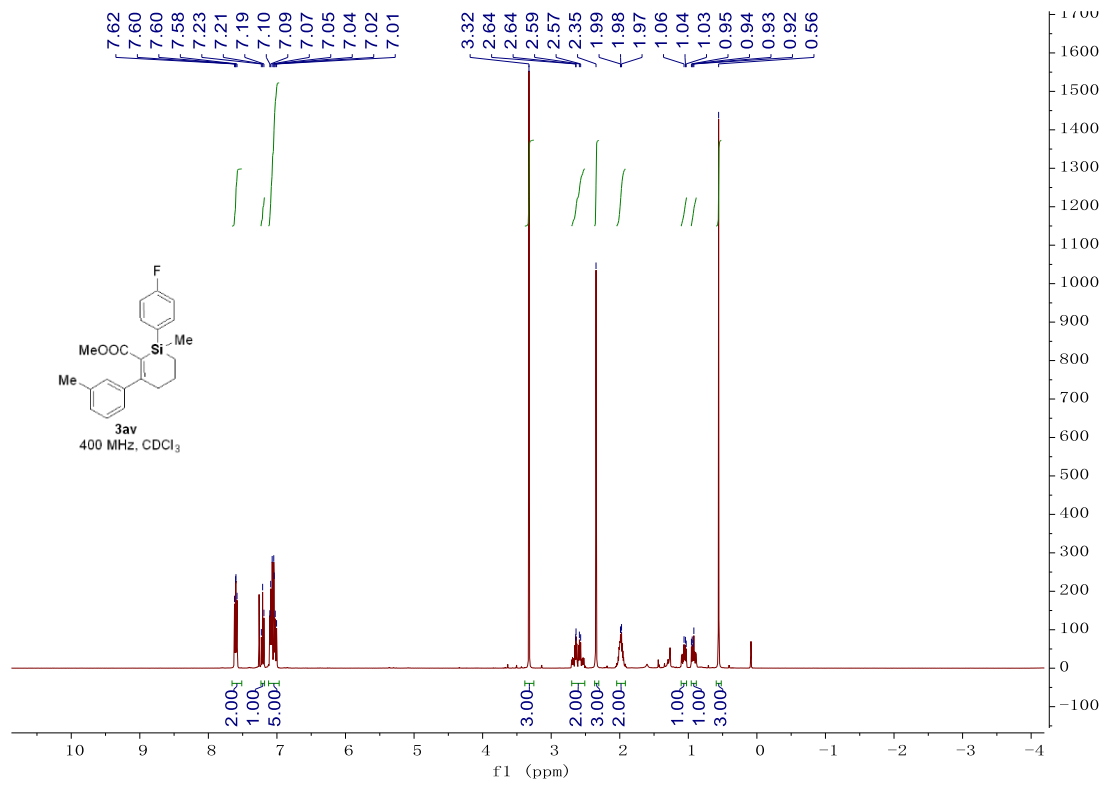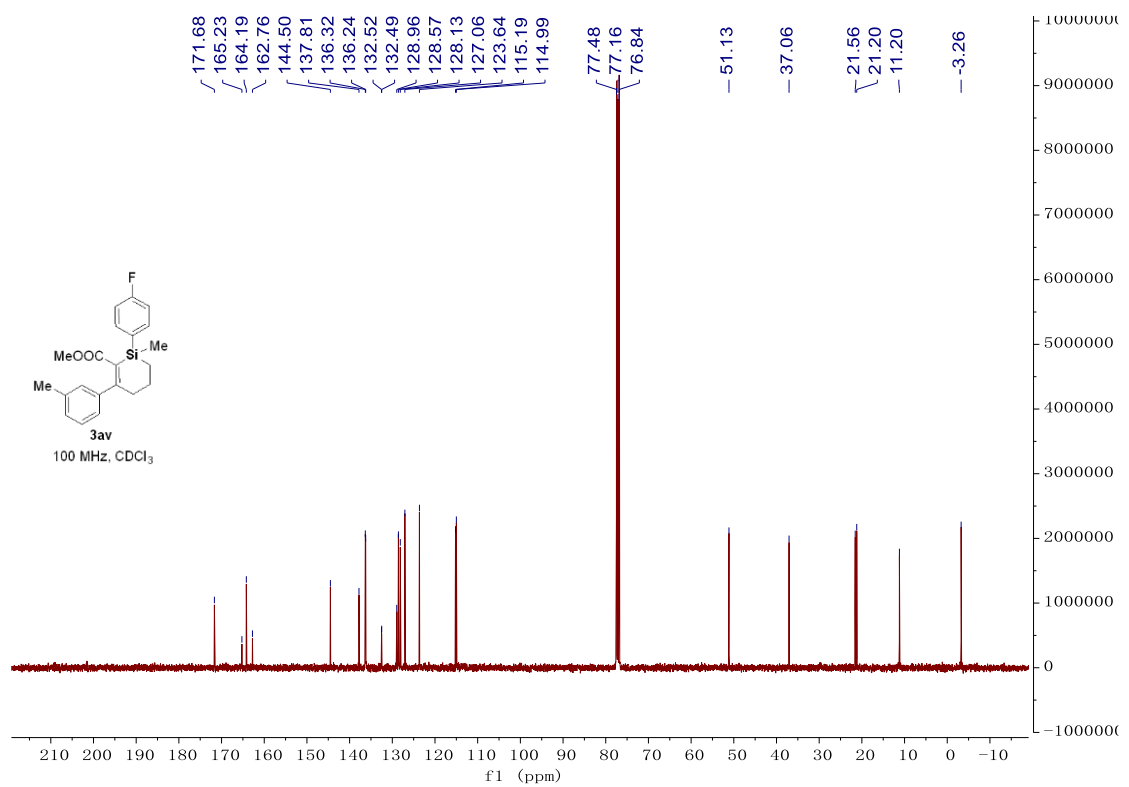

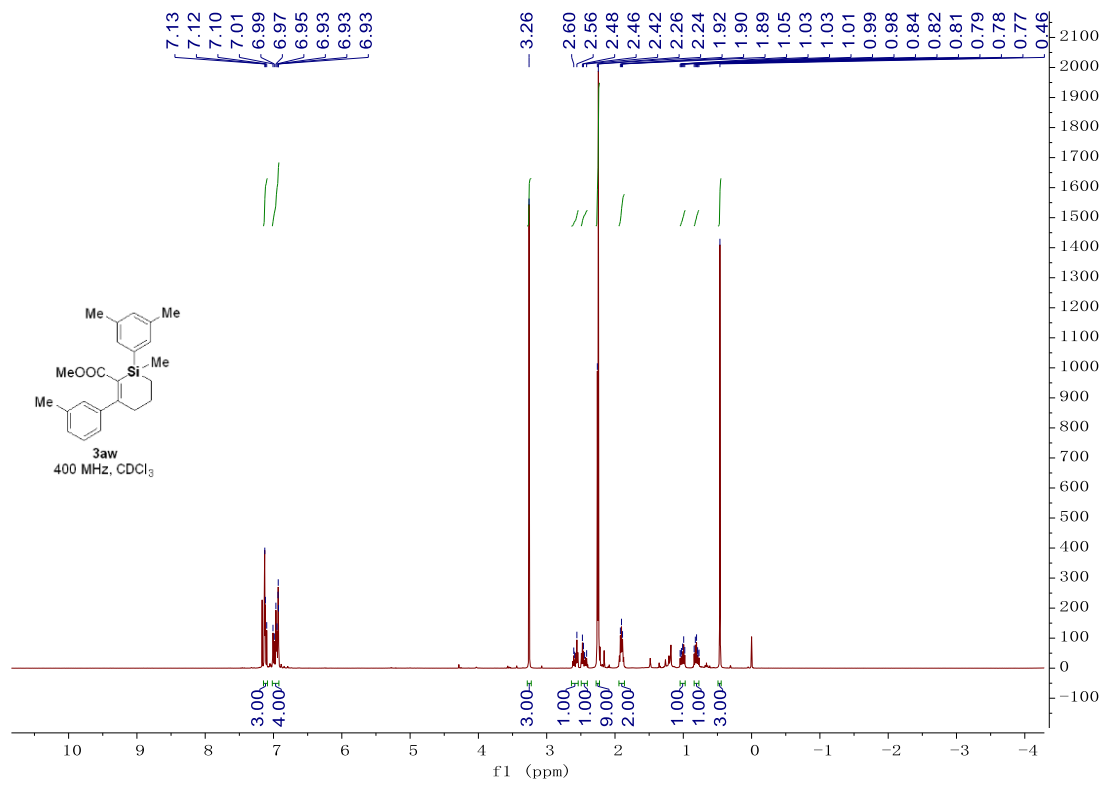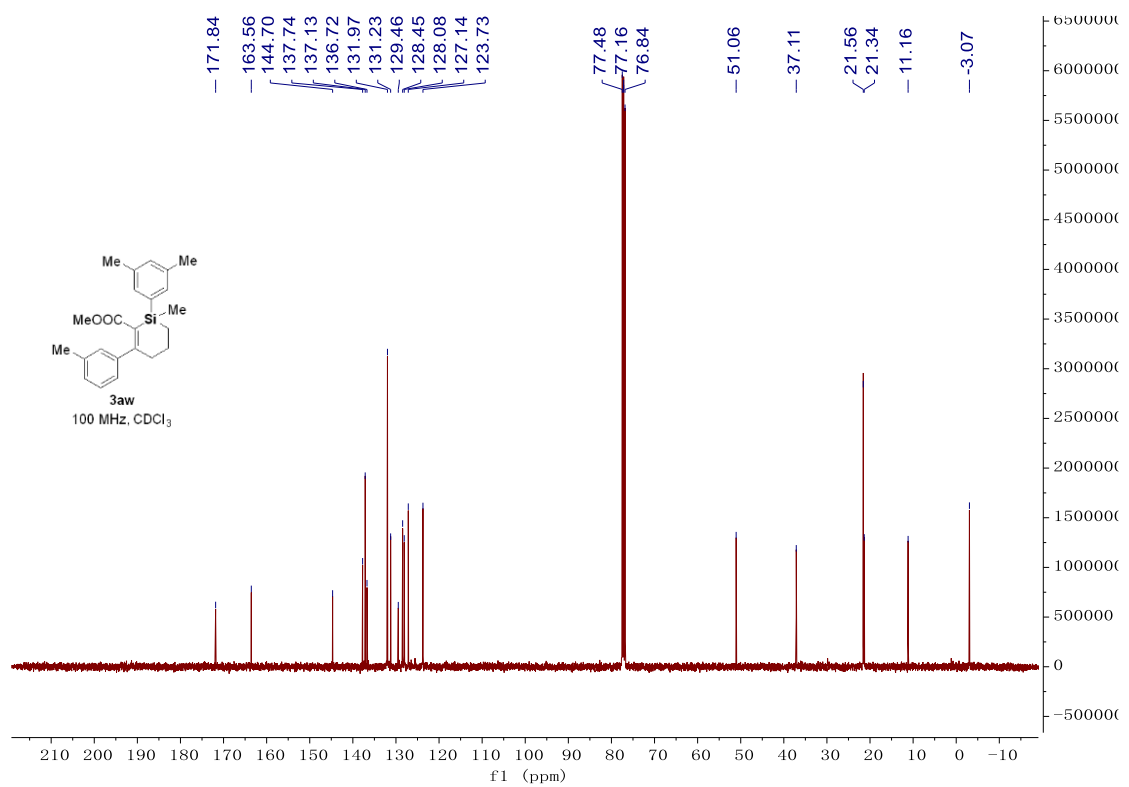

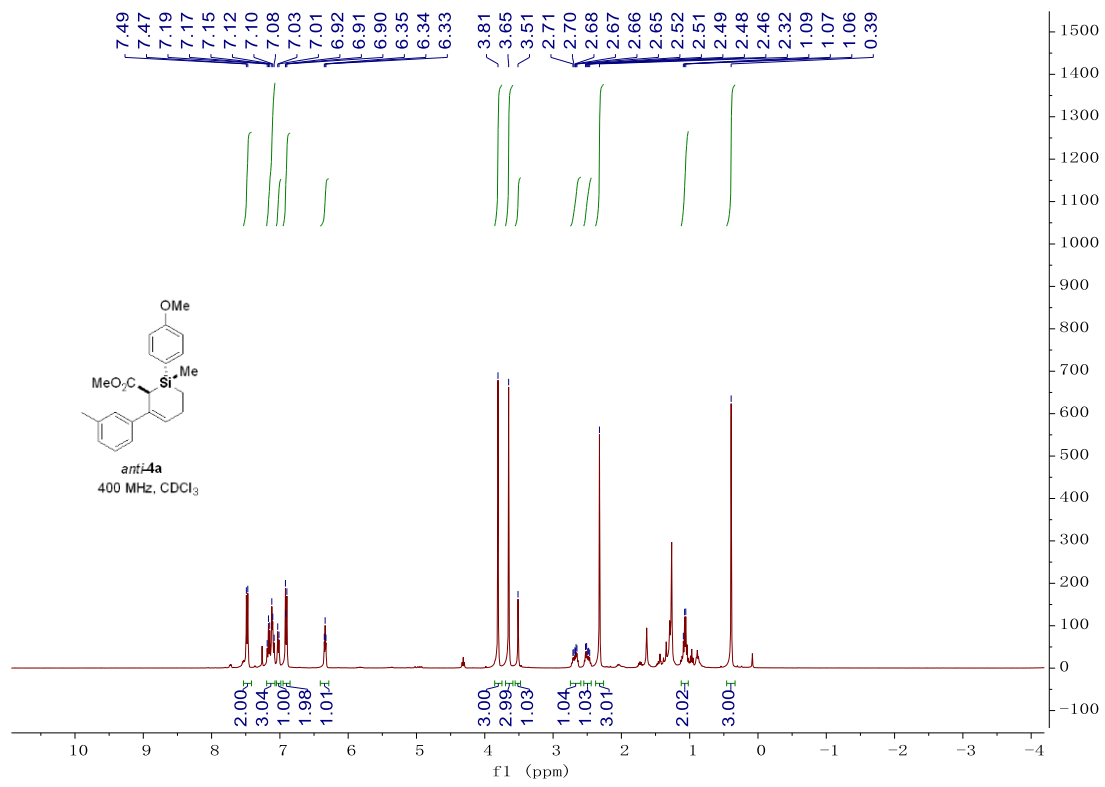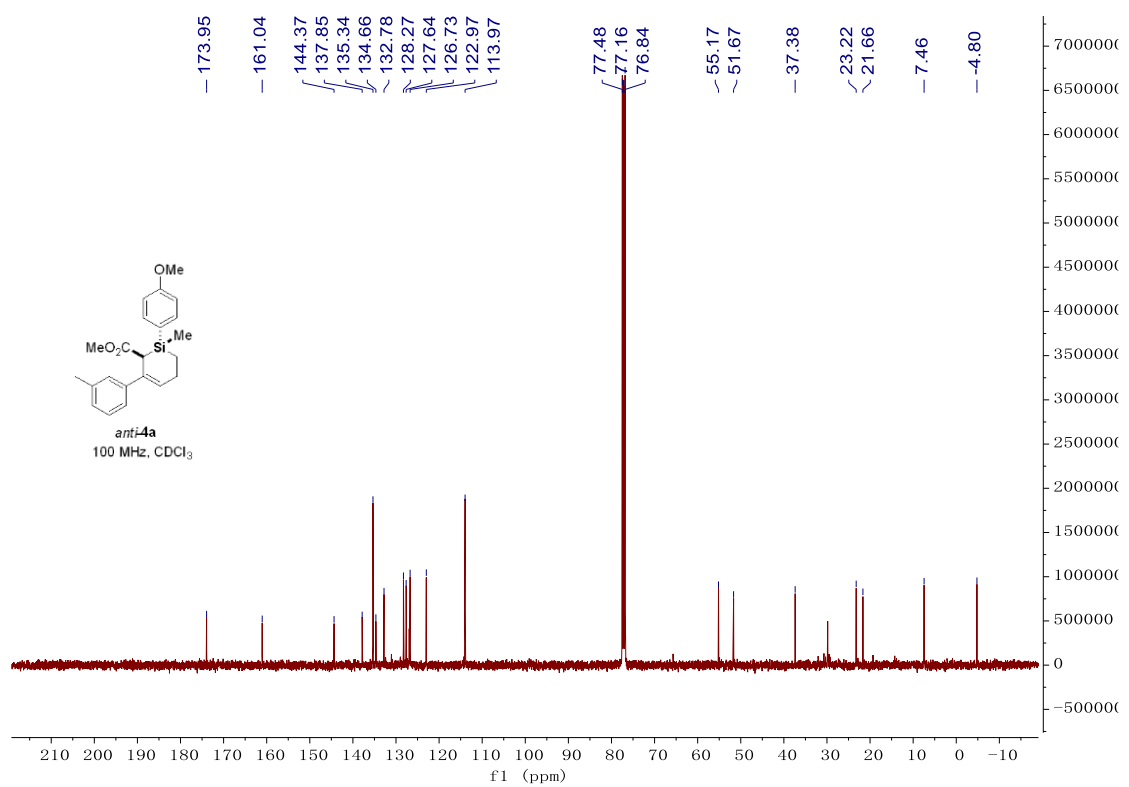

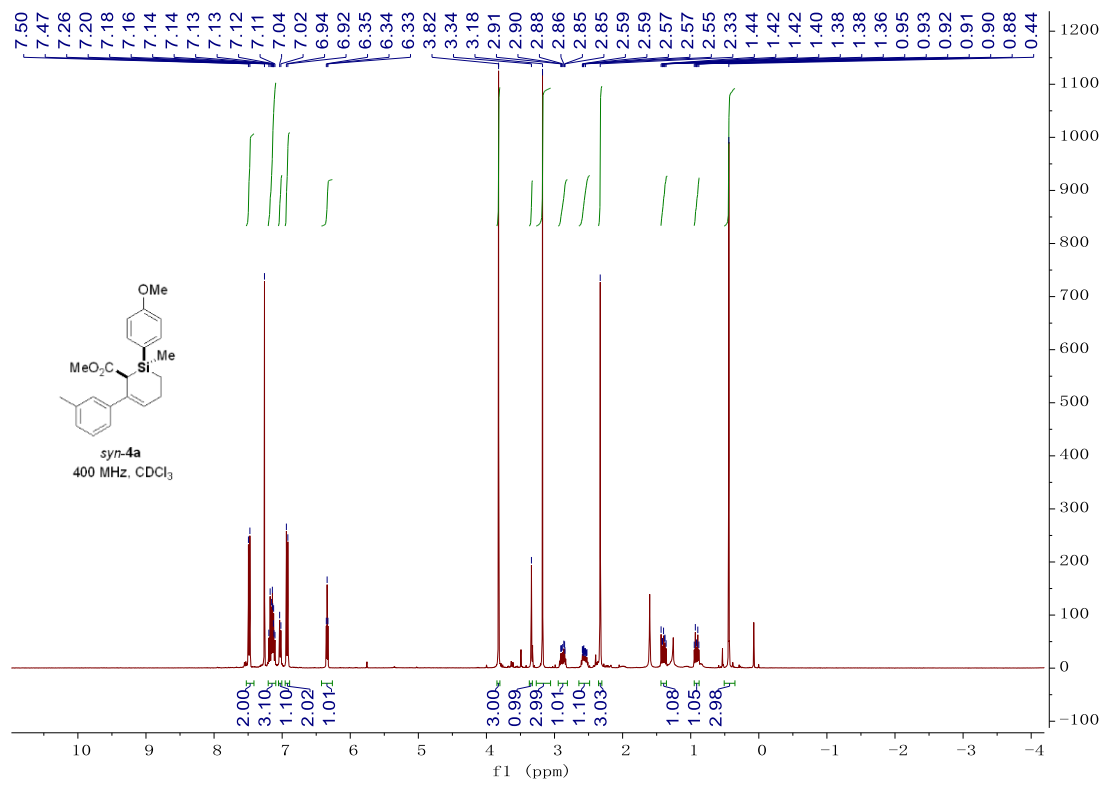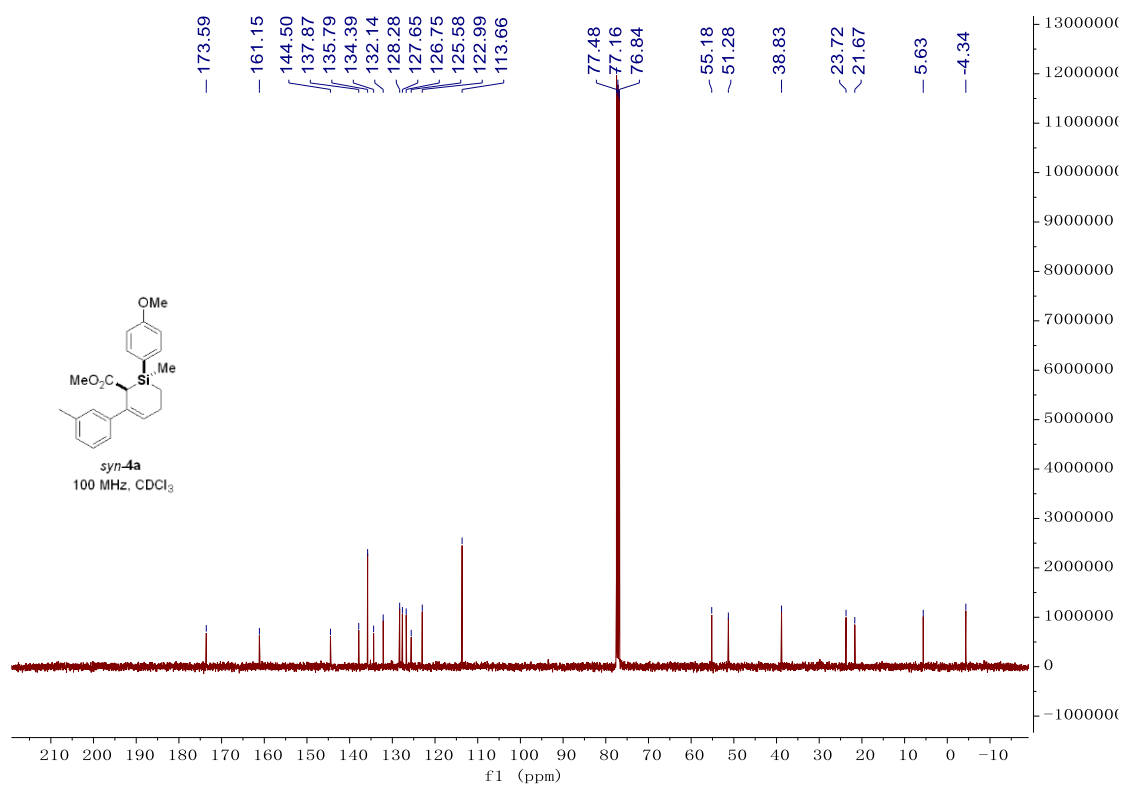

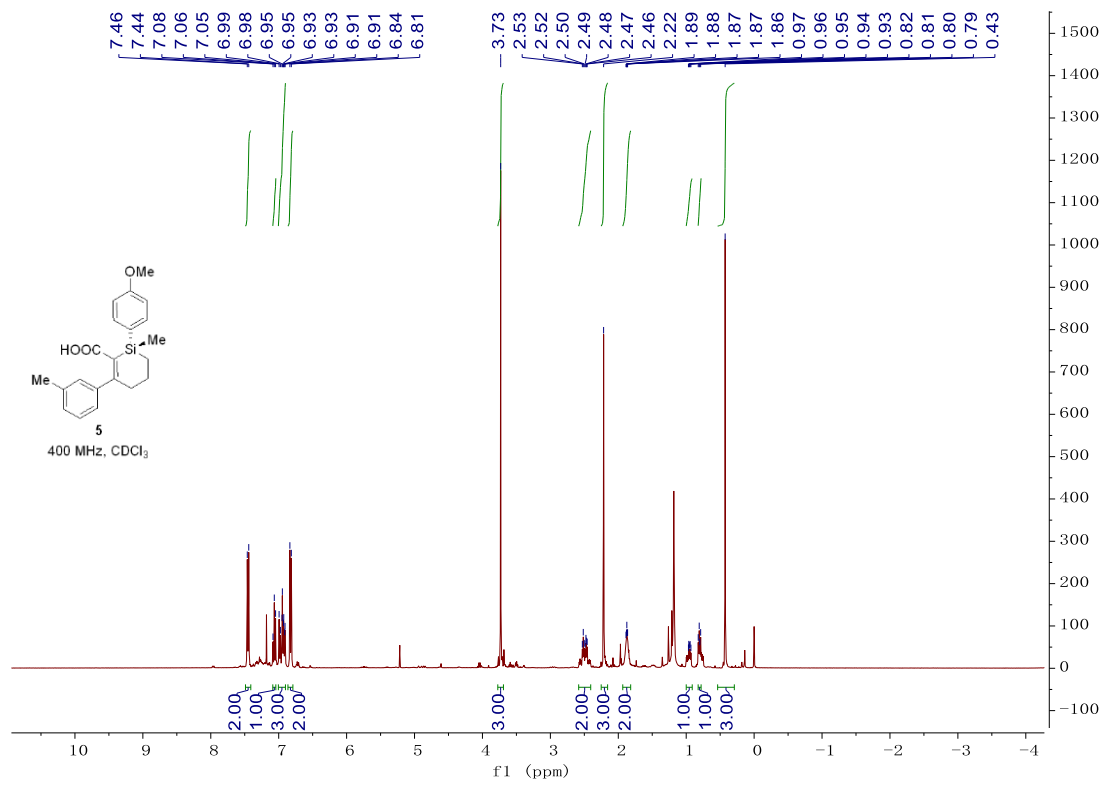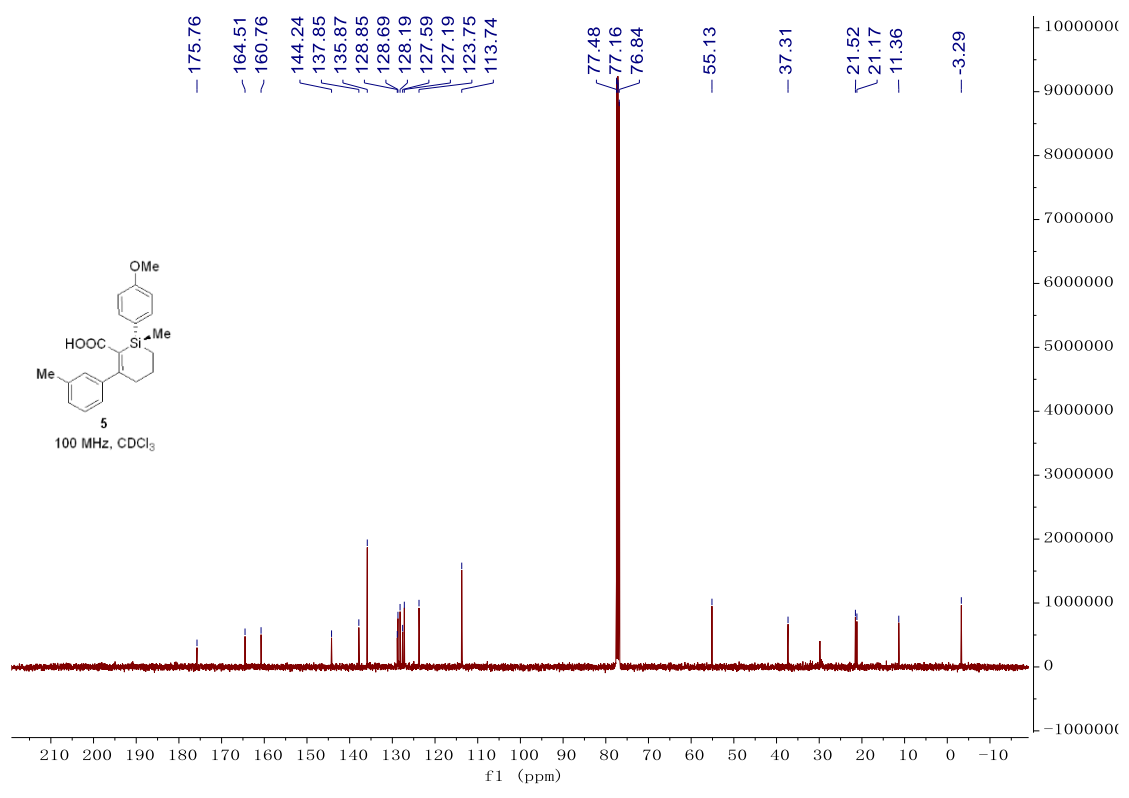



## 9. HPLC Spectra

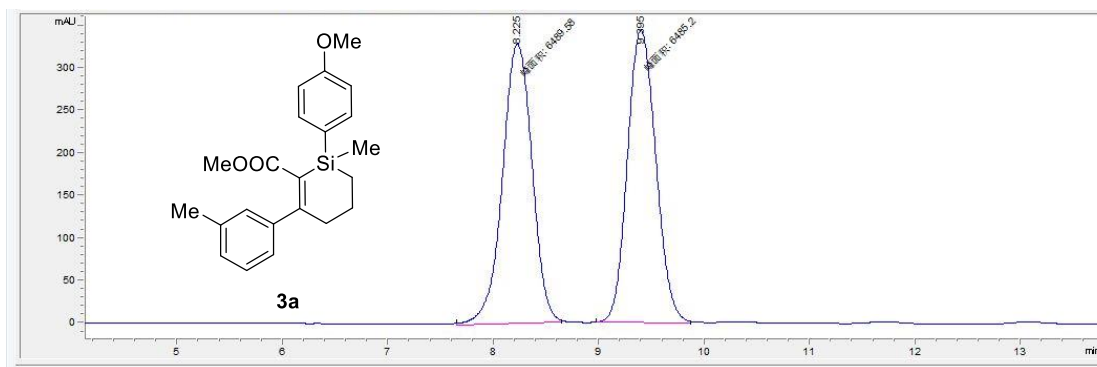

|   | Time/min | Area   | Height | Area%  |
|---|----------|--------|--------|--------|
| 1 | 8.225    | 6489.6 | 329.0  | 50.017 |
| 2 | 9.395    | 6485.2 | 344.8  | 49.983 |

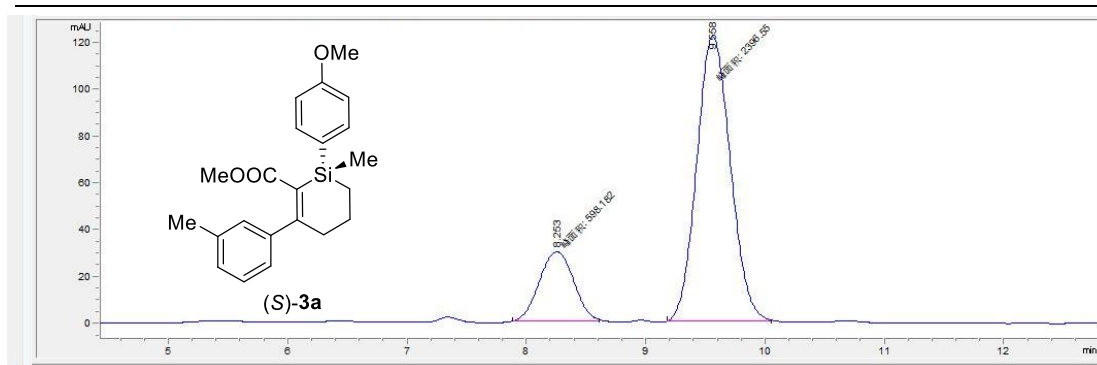

|   | Time/min | Area   | Height | Area%  |
|---|----------|--------|--------|--------|
| 1 | 8.253    | 598.2  | 29.8   | 19.974 |
| 2 | 9.558    | 2396.6 | 122.0  | 80.026 |

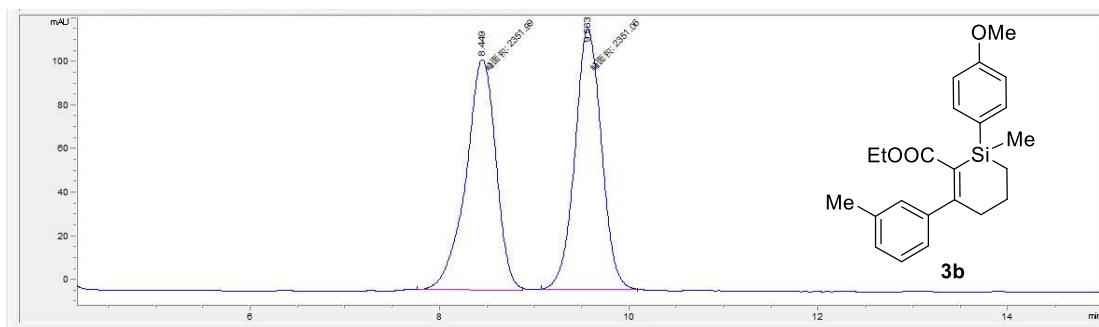

|   | Time/min | Area   | Height | Area%  |
|---|----------|--------|--------|--------|
| 1 | 8.449    | 2352   | 105.9  | 50.010 |
| 2 | 9.563    | 2351.1 | 119.7  | 49.990 |

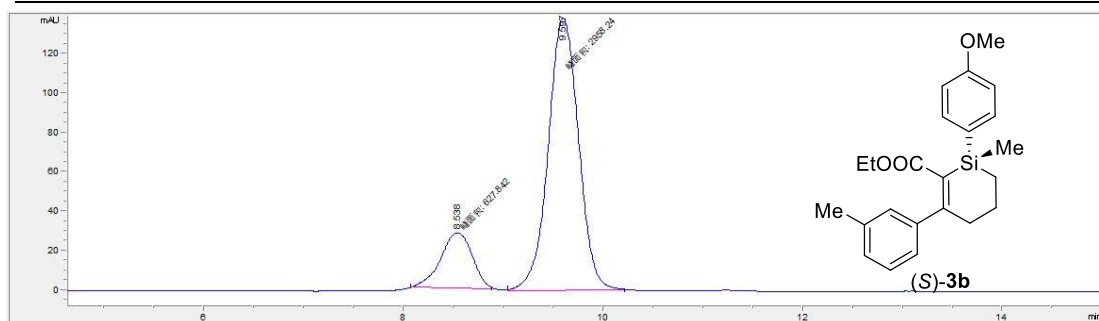

|   | Time/min | Area   | Height | Area%  |
|---|----------|--------|--------|--------|
| 1 | 8.538    | 627.8  | 28.2   | 17.508 |
| 2 | 9.597    | 2958.2 | 138.9  | 82.492 |

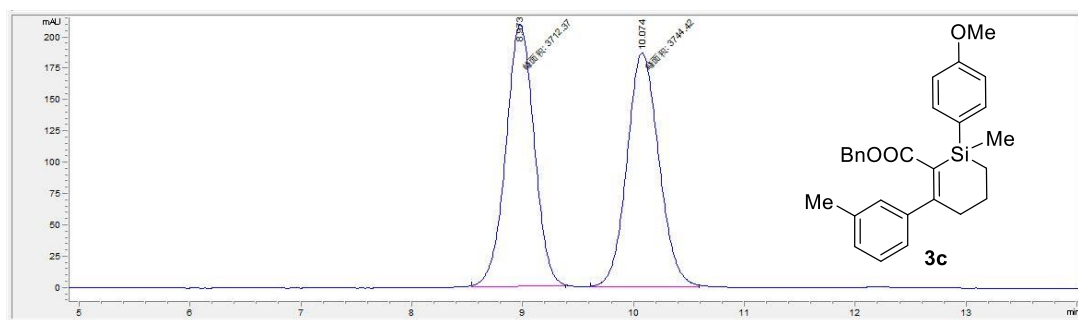

|   | Time/min | Area   | Height | Area%  |
|---|----------|--------|--------|--------|
| 1 | 8.973    | 3712.4 | 209.4  | 49.785 |
| 2 | 10.074   | 3744.4 | 186.8  | 50.215 |

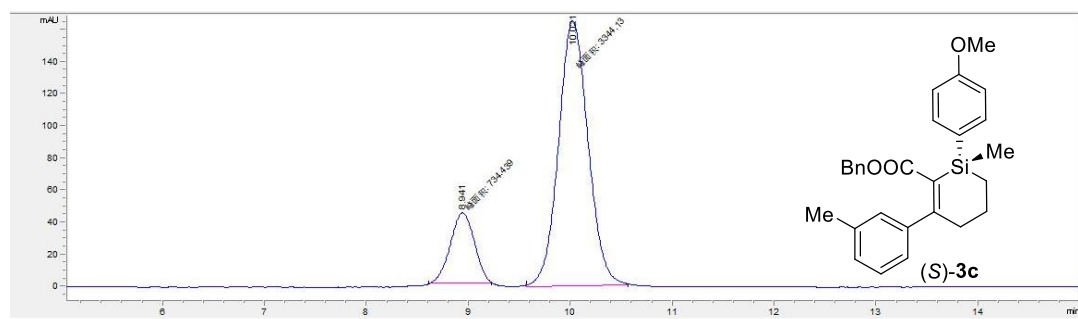

|   | Time/min | Area   | Height | Area%  |
|---|----------|--------|--------|--------|
| 1 | 8.941    | 734.4  | 44.3   | 18.007 |
| 2 | 10.021   | 3344.1 | 165.4  | 81.993 |

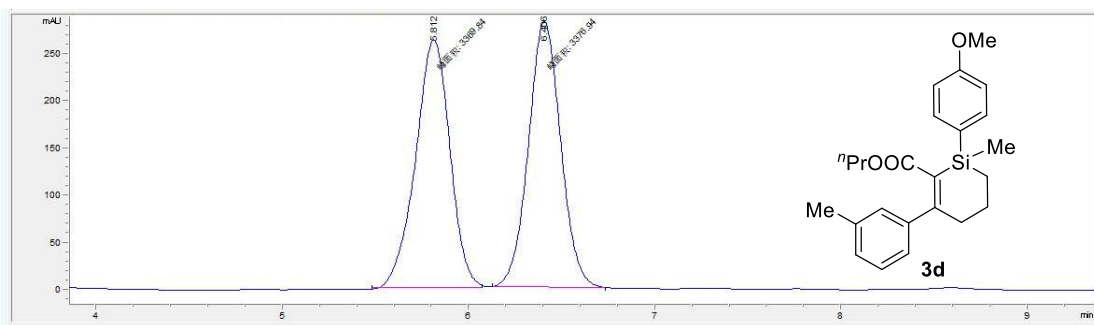

|   | Time/min | Area   | Height | Area%  |
|---|----------|--------|--------|--------|
| 1 | 5.812    | 3369.8 | 262.8  | 49.947 |
| 2 | 6.406    | 3376.9 | 281.4  | 50.053 |

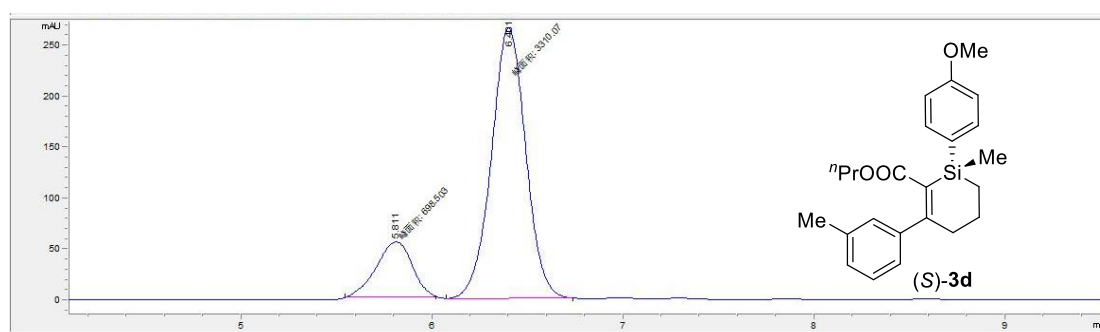

|   | Time/min | Area   | Height | Area%  |
|---|----------|--------|--------|--------|
| 1 | 5.811    | 698.5  | 53.9   | 17.425 |
| 2 | 6.401    | 3310.1 | 265.8  | 82.575 |

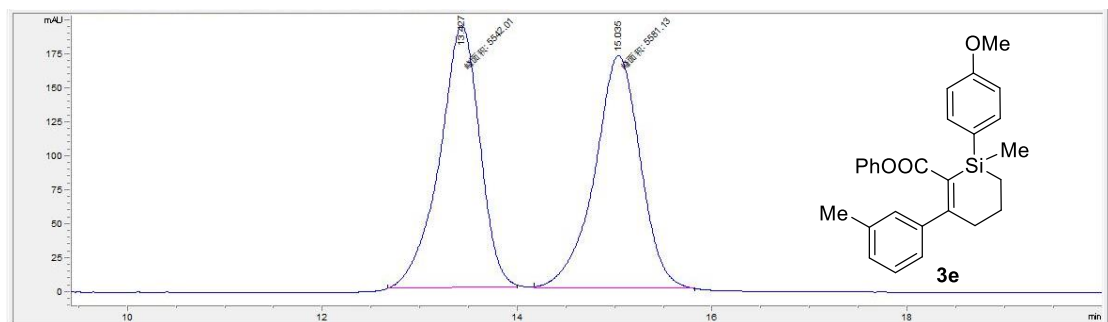

|   | Time/min | Area   | Height | Area%  |
|---|----------|--------|--------|--------|
| 1 | 13.427   | 5542   | 192.7  | 49.824 |
| 2 | 15.035   | 5581.1 | 171.1  | 50.176 |

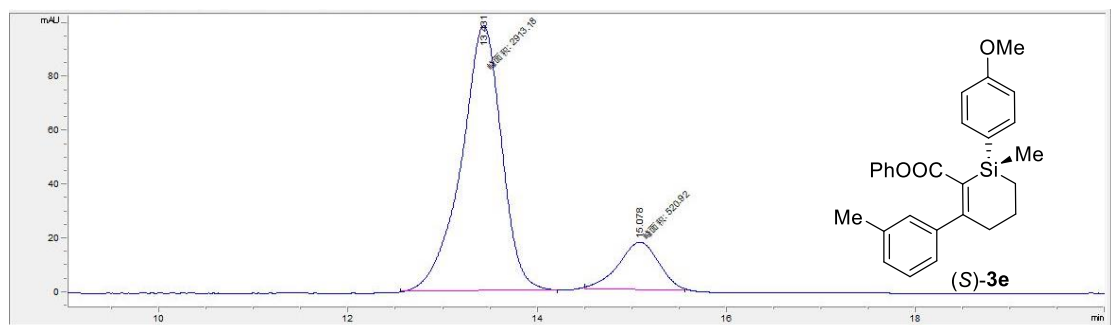

|   | Time/min | Area   | Height | Area%  |
|---|----------|--------|--------|--------|
| 1 | 13.431   | 2913.2 | 98.5   | 84.831 |
| 2 | 15.078   | 520.9  | 17.5   | 15.169 |

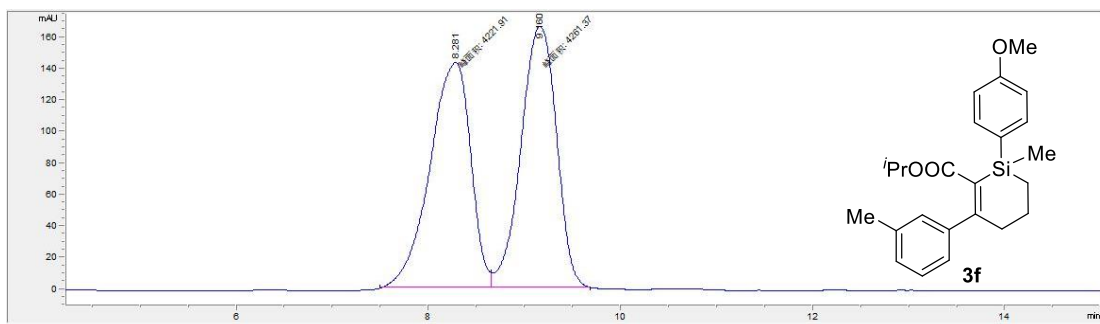

|   | Time/min | Area   | Height | Area%  |
|---|----------|--------|--------|--------|
| 1 | 8.281    | 4221.9 | 142.9  | 49.767 |
| 2 | 9.16     | 4261.4 | 165.7  | 50.233 |

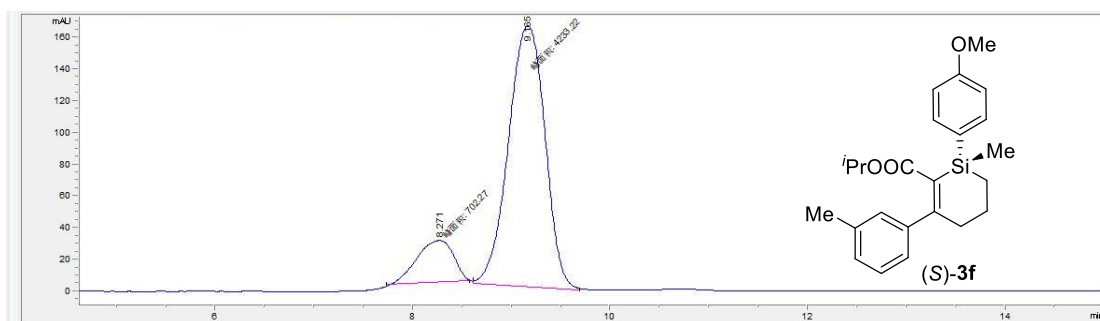

|   | Time/min | Area   | Height | Area%  |
|---|----------|--------|--------|--------|
| 1 | 8.271    | 702.3  | 26.7   | 14.299 |
| 2 | 9.165    | 4233.2 | 164.5  | 85.771 |

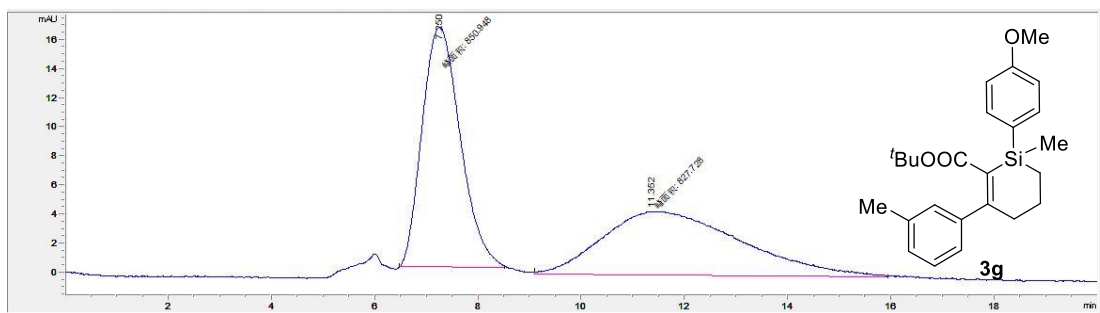

|   | Time/min | Area  | Height | Area%  |
|---|----------|-------|--------|--------|
| 1 | 7.25     | 850.9 | 16.5   | 50.692 |
| 2 | 11.352   | 827.7 | 4.4    | 49.308 |

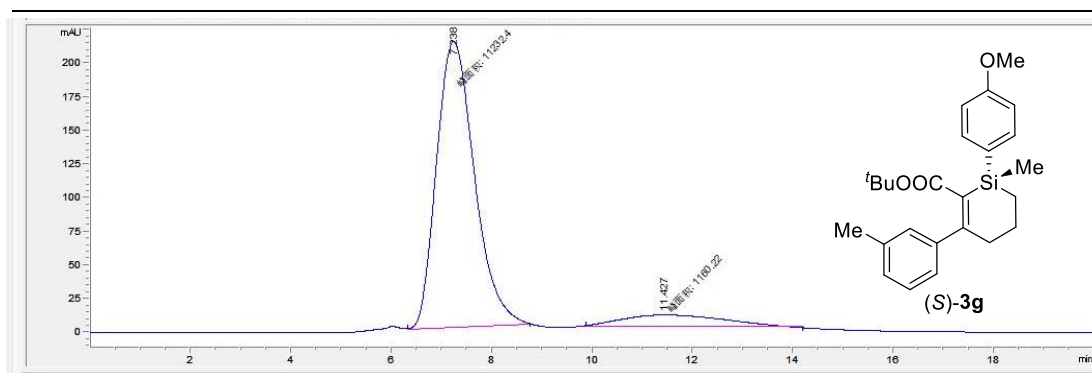

|   | Time/min | Area    | Height | Area%  |
|---|----------|---------|--------|--------|
| 1 | 7.238    | 11232.4 | 212.9  | 90.638 |
| 2 | 11.427   | 1160.2  | 8.4    | 9.362  |

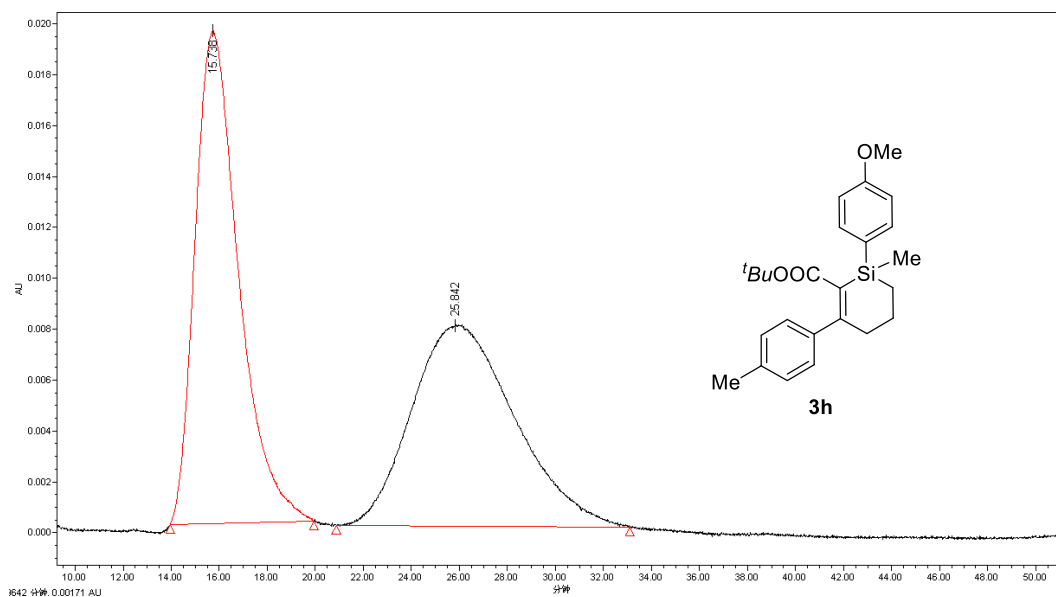

|   | Time/min | Area    | Height | Area% |
|---|----------|---------|--------|-------|
| 1 | 15.738   | 2444349 | 19374  | 50.86 |
| 2 | 25.842   | 2362113 | 7904   | 49.14 |

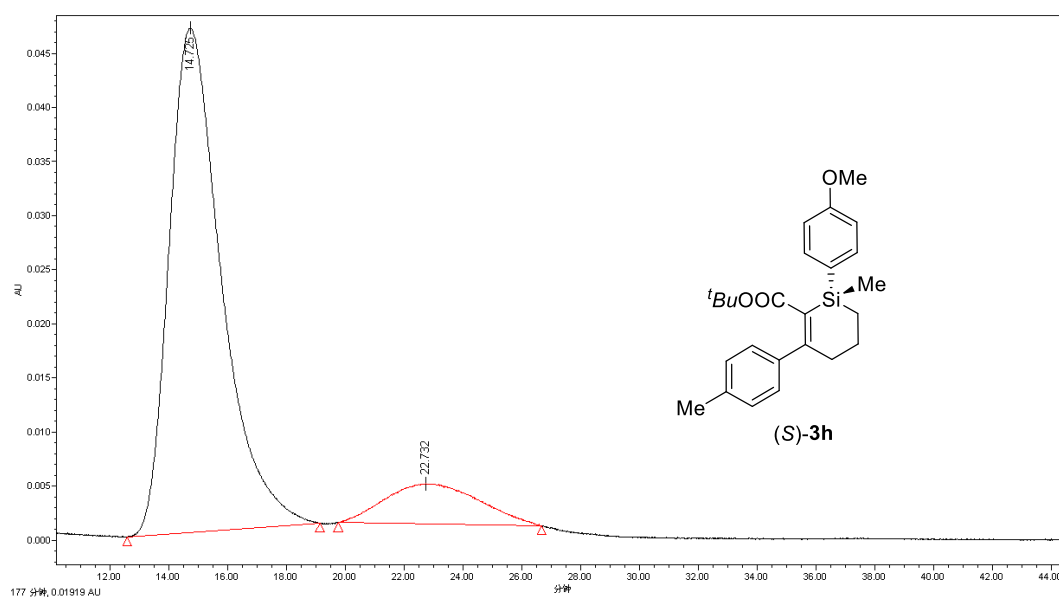

|   | Time/min | Area    | Height | Area% |
|---|----------|---------|--------|-------|
| 1 | 14.725   | 5758452 | 46581  | 87.42 |
| 2 | 22.732   | 828617  | 3721   | 12.58 |



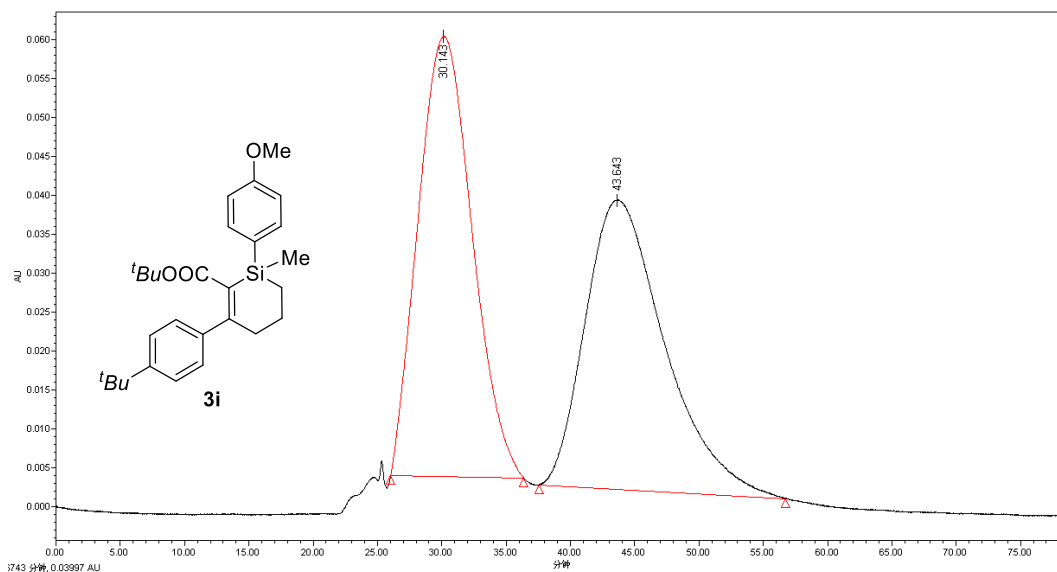

|   | Time/min | Area     | Height | Area% |
|---|----------|----------|--------|-------|
| 1 | 30.143   | 16479937 | 56507  | 50.82 |
| 2 | 43.643   | 15946264 | 37134  | 49.18 |

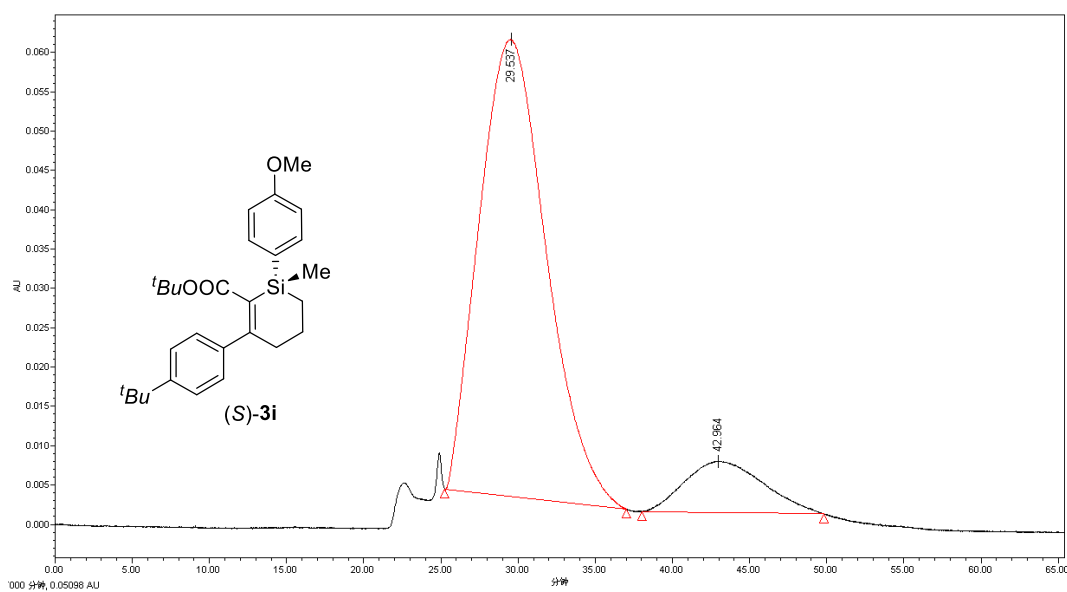

|   | Time/min | Area     | Height | Area% |
|---|----------|----------|--------|-------|
| 1 | 29.537   | 17631221 | 58071  | 88.44 |
| 2 | 42.964   | 2303590  | 6516   | 11.56 |

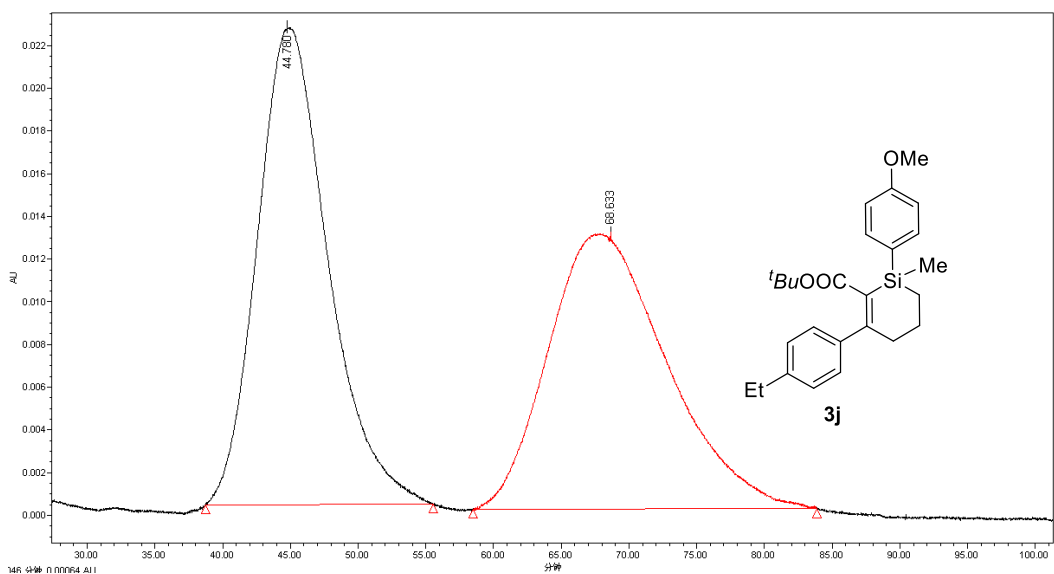

|   | Time/min | Area    | Height | Area% |
|---|----------|---------|--------|-------|
| 1 | 44.780   | 8116999 | 22361  | 50.81 |
| 2 | 68.633   | 7858572 | 12782  | 49.19 |

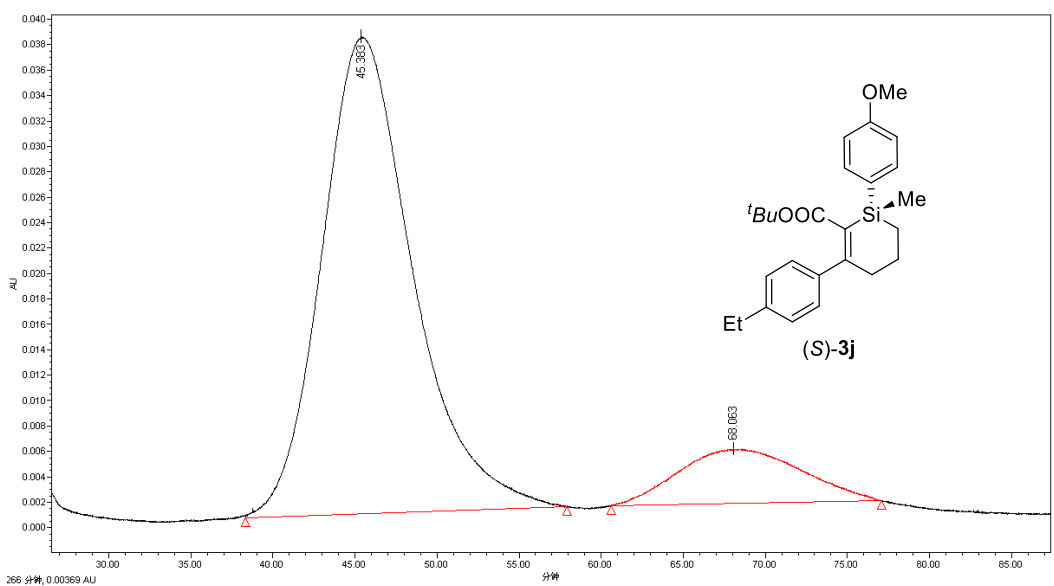

|   | Time/min | Area     | Height | Area% |
|---|----------|----------|--------|-------|
| 1 | 45.383   | 14452558 | 37538  | 86.68 |
| 2 | 68.063   | 2220516  | 4306   | 13.32 |

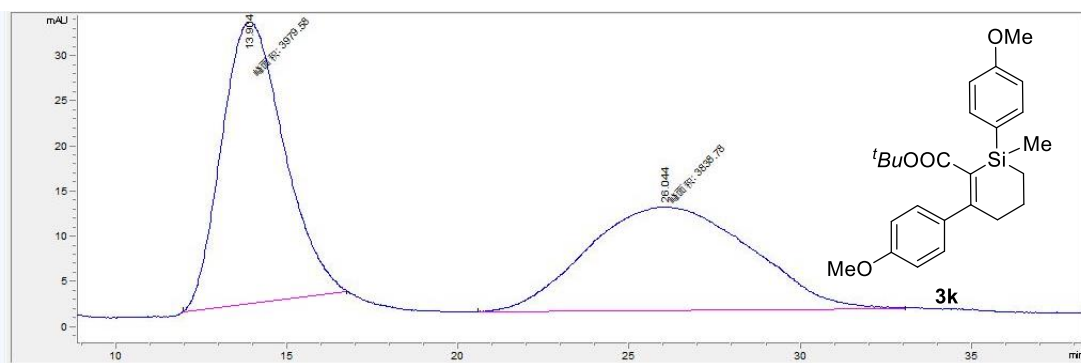

|   | Time/min | Area   | Height | Area%  |
|---|----------|--------|--------|--------|
| 1 | 13.904   | 3979.6 | 31.2   | 50.900 |
| 2 | 26.044   | 3838.8 | 11.5   | 49.100 |

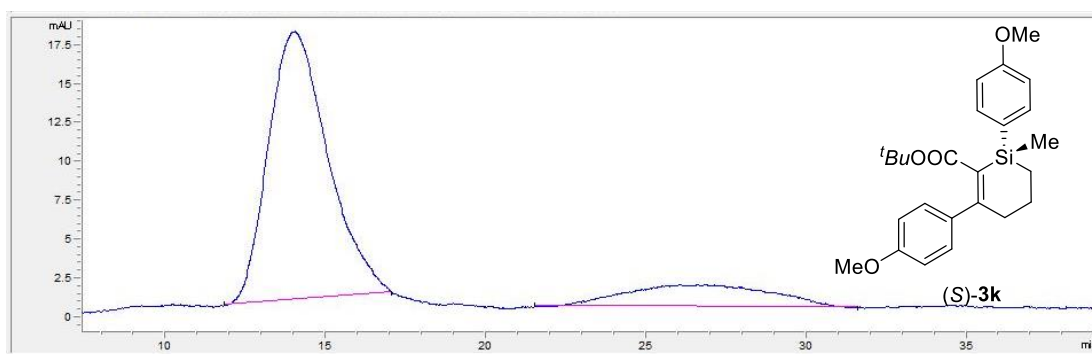

|   | Time/min | Area   | Height | Area%  |
|---|----------|--------|--------|--------|
| 1 | 13.989   | 2231.9 | 17.3   | 83.072 |
| 2 | 26.844   | 545.8  | 1.4    | 16.928 |

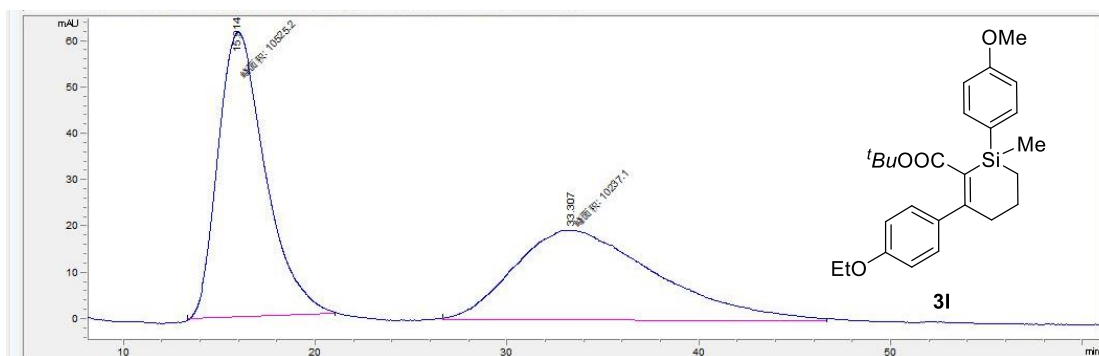

|   | Time/min | Area    | Height | Area%  |
|---|----------|---------|--------|--------|
| 1 | 15.914   | 10525.2 | 61.5   | 50.694 |
| 2 | 33.307   | 10237.1 | 19.6   | 49.306 |

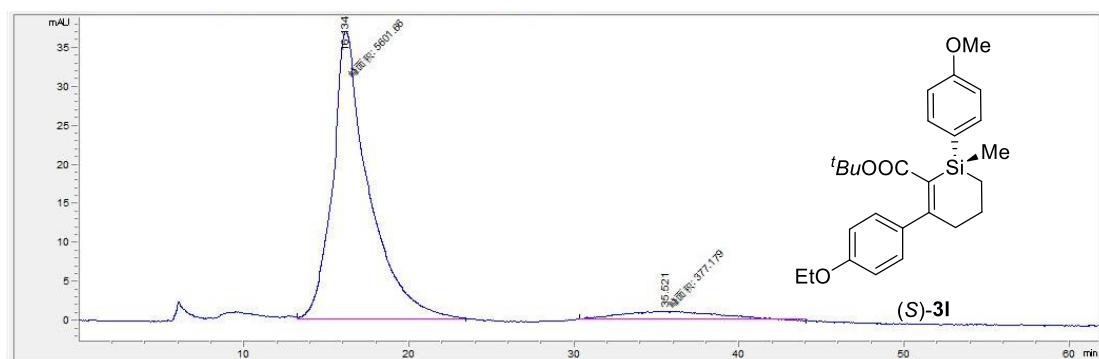

|   | Time/min | Area   | Height | Area%  |
|---|----------|--------|--------|--------|
| 1 | 16.134   | 5601.7 | 36.8   | 93.691 |
| 2 | 35.521   | 377.2  | 1      | 6.309  |

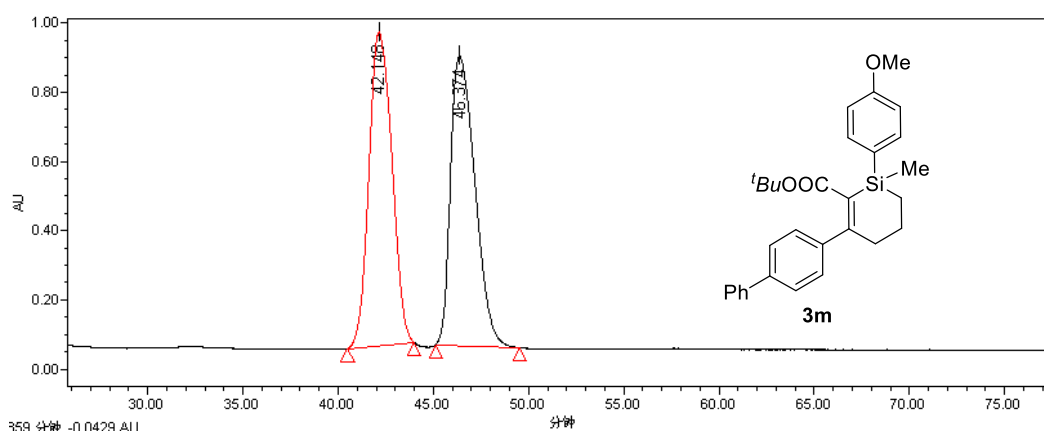

|   | Time/min | Area     | Height | Area% |
|---|----------|----------|--------|-------|
| 1 | 42.148   | 75976378 | 905869 | 50.47 |
| 2 | 46.374   | 74565047 | 837239 | 49.53 |

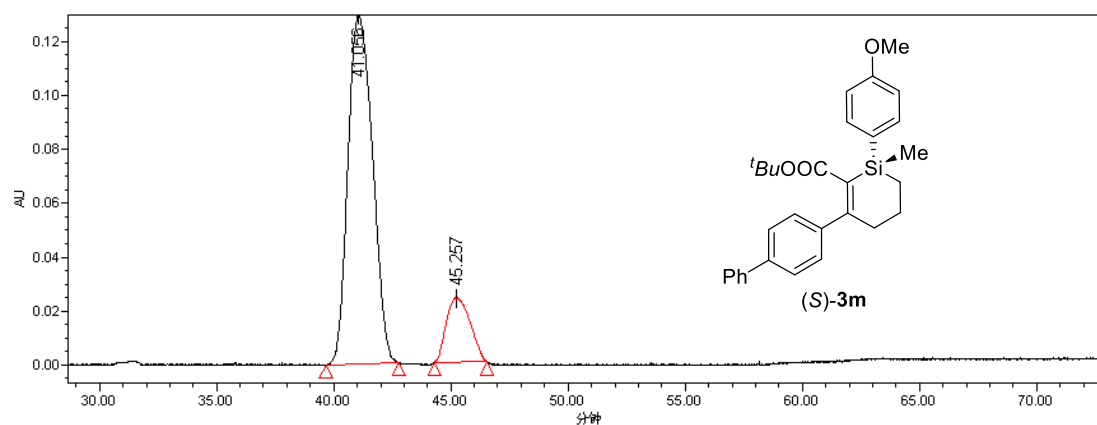

|   | Time/min | Area    | Height | Area% |
|---|----------|---------|--------|-------|
| 1 | 41.056   | 9461729 | 129353 | 84.94 |
| 2 | 45.257   | 1677055 | 23642  | 15.06 |

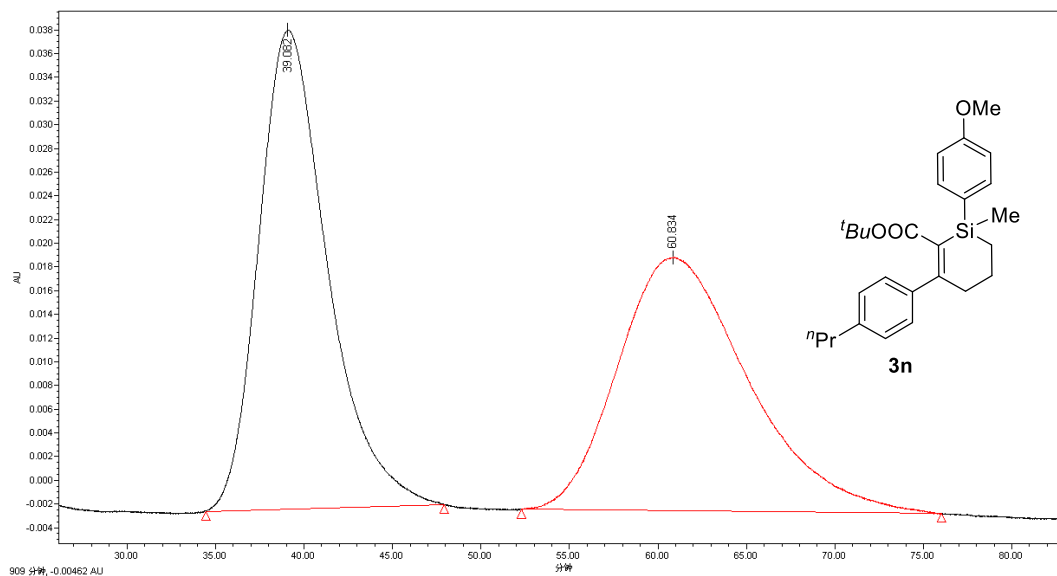

|   | Time/min | Area     | Height | Area% |
|---|----------|----------|--------|-------|
| 1 | 39.082   | 10929952 | 40379  | 49.94 |
| 2 | 60.834   | 10956851 | 21384  | 50.06 |

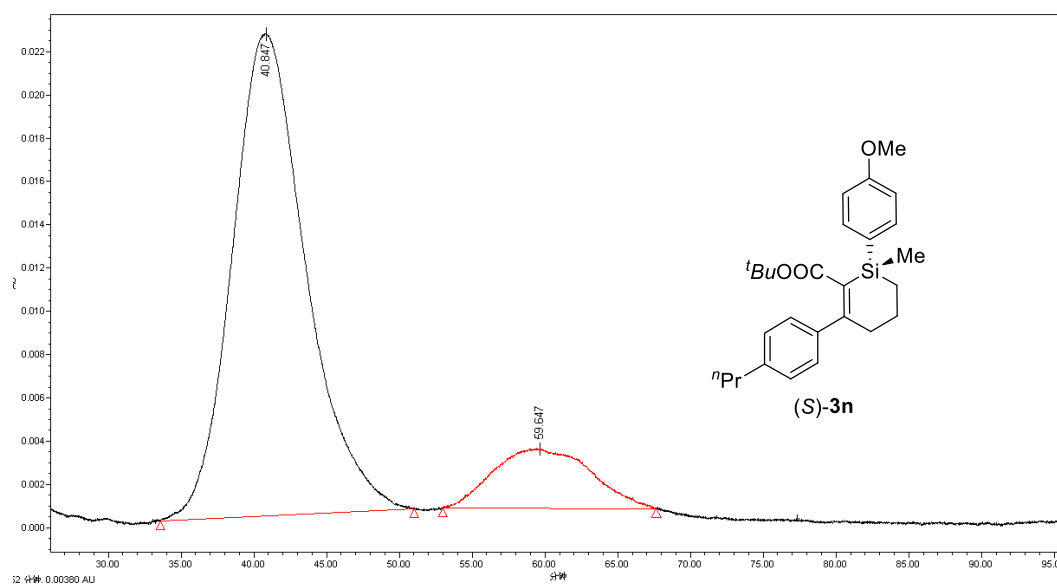

|   | Time/min | Area    | Height | Area% |
|---|----------|---------|--------|-------|
| 1 | 40.847   | 7830199 | 22268  | 85.92 |
| 2 | 59.647   | 1283308 | 2758   | 14.08 |

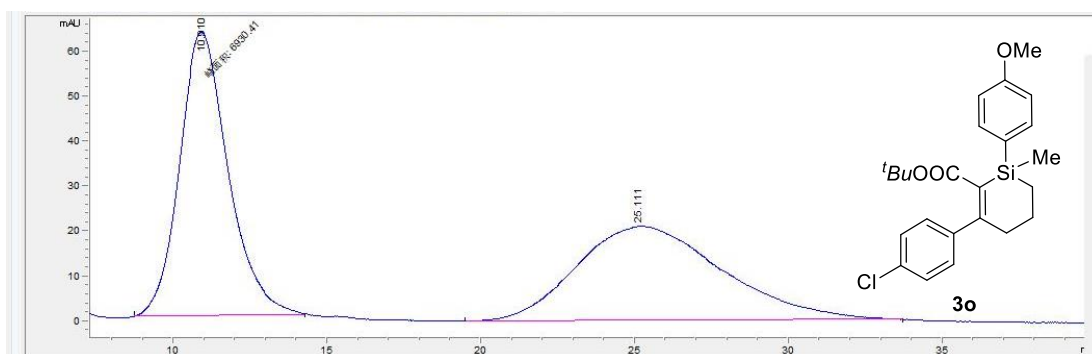

|   | Time/min | Area   | Height | Area%  |
|---|----------|--------|--------|--------|
| 1 | 10.91    | 6930.4 | 63     | 50.036 |
| 2 | 25.111   | 6920.5 | 21     | 49.964 |

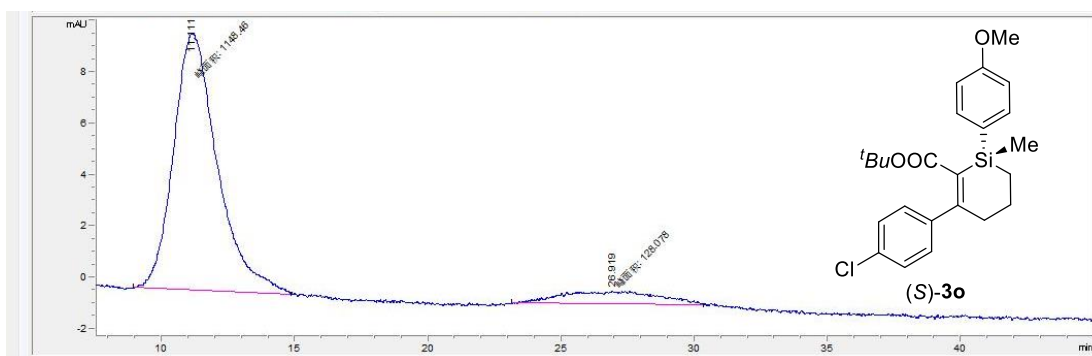

|   | Time/min | Area   | Height | Area%  |
|---|----------|--------|--------|--------|
| 1 | 11.111   | 1148.5 | 10     | 89.967 |
| 2 | 26.919   | 128.1  | 0.52   | 10.033 |

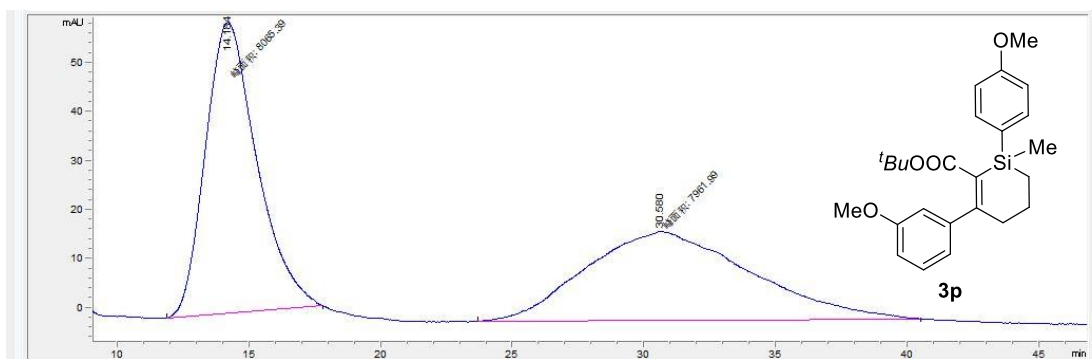

|   | Time/min | Area   | Height | Area%  |
|---|----------|--------|--------|--------|
| 1 | 14.184   | 8065.4 | 59.4   | 50.323 |
| 2 | 30.58    | 7962   | 18.2   | 49.677 |

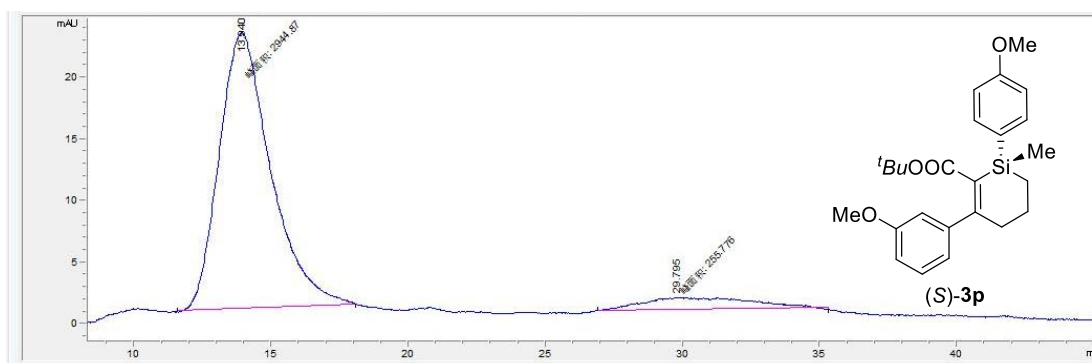

|   | Time/min | Area   | Height | Area%  |
|---|----------|--------|--------|--------|
| 1 | 13.94    | 2944.9 | 22.5   | 92.009 |
| 2 | 29.795   | 255.8  | 0.95   | 7.991  |



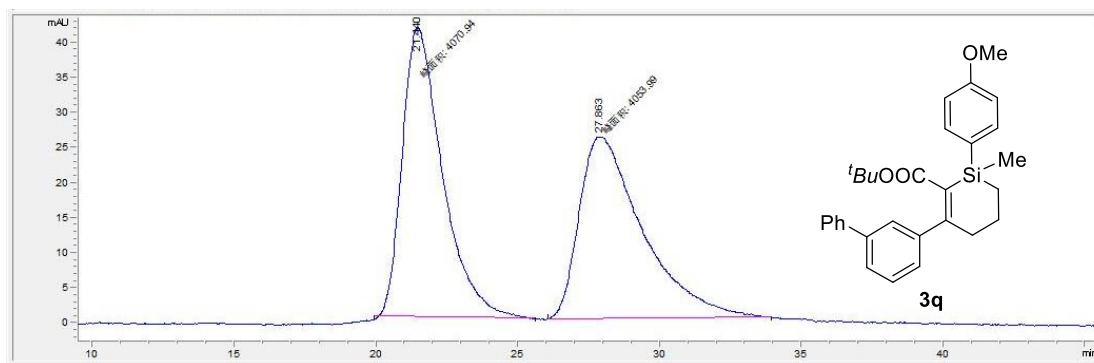

|   | Time/min | Area   | Height | Area%  |
|---|----------|--------|--------|--------|
| 1 | 21.44    | 4070.9 | 41.2   | 50.104 |
| 2 | 27.863   | 4054   | 26     | 49.896 |

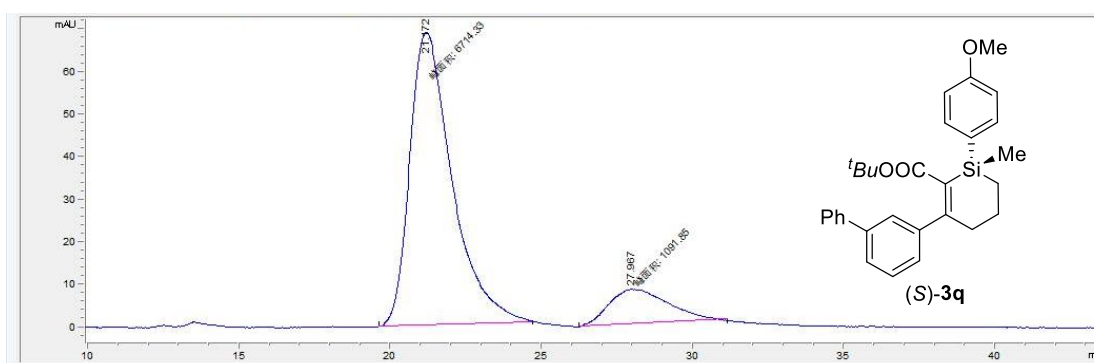

|   | Time/min | Area   | Height | Area%  |
|---|----------|--------|--------|--------|
| 1 | 21.172   | 6714.3 | 68.8   | 86.013 |
| 2 | 27.967   | 1091.8 | 8.1    | 13.987 |

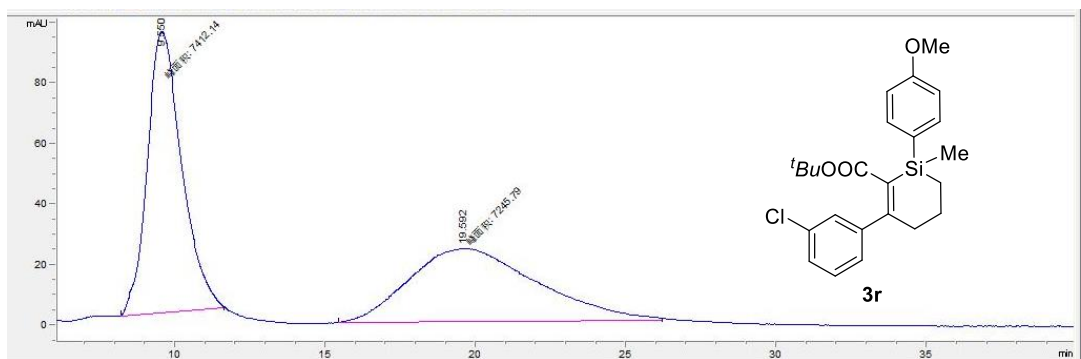

|   | Time/min | Area   | Height | Area%  |
|---|----------|--------|--------|--------|
| 1 | 9.55     | 7412.1 | 92.6   | 50.567 |
| 2 | 19.592   | 7245.8 | 24.3   | 49.433 |

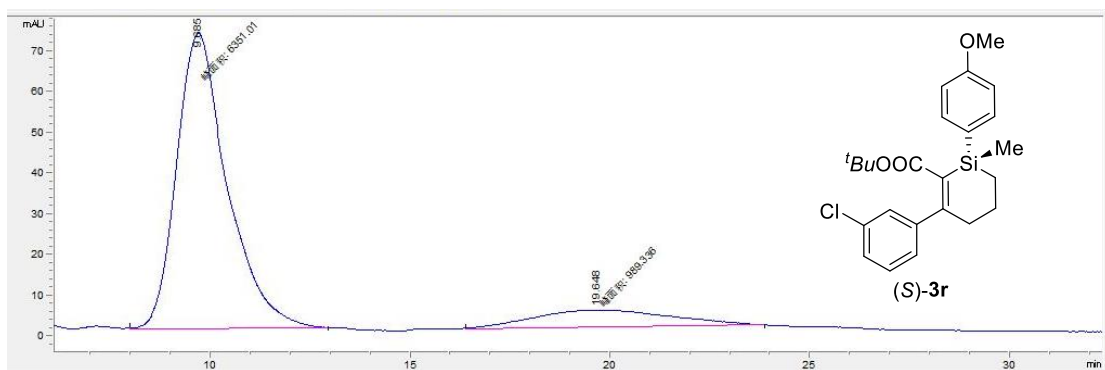

|   | Time/min | Area  | Height | Area%  |
|---|----------|-------|--------|--------|
| 1 | 9.685    | 6351  | 72.4   | 86.522 |
| 2 | 19.648   | 989.3 | 4.2    | 13.478 |

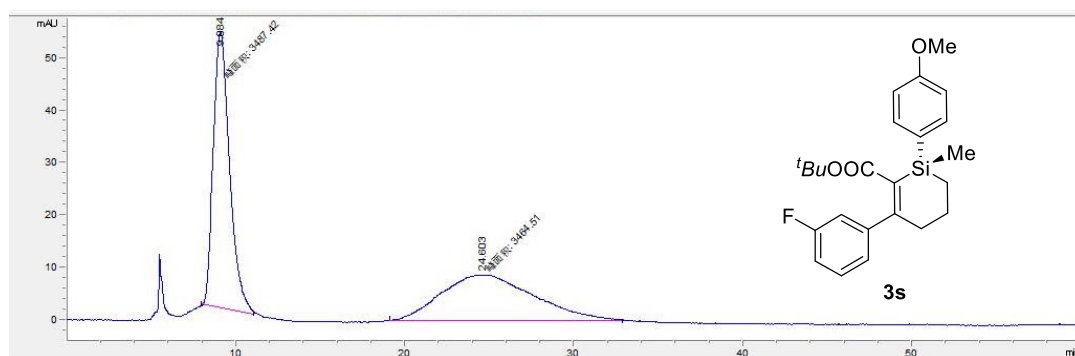

|   | Time/min | Area   | Height | Area%  |
|---|----------|--------|--------|--------|
| 1 | 9.084    | 3487.4 | 52.5   | 50.165 |
| 2 | 24.603   | 3464.5 | 8.9    | 49.835 |

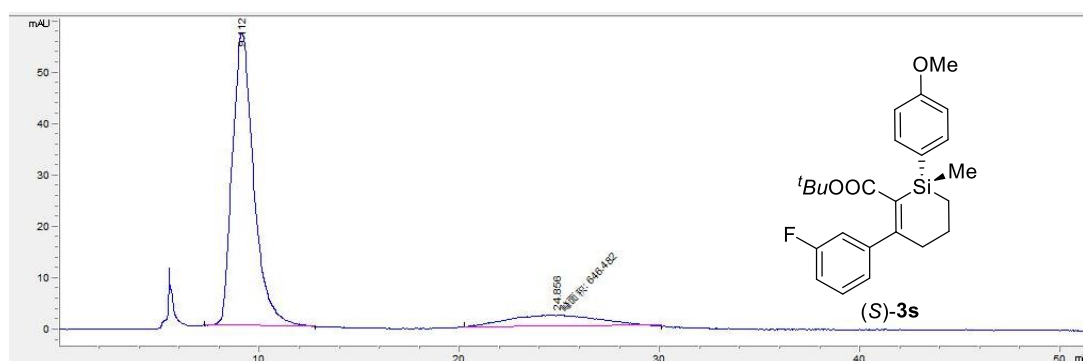

|   | Time/min | Area   | Height | Area%  |
|---|----------|--------|--------|--------|
| 1 | 9.112    | 4255.9 | 57.1   | 86.813 |
| 2 | 24.856   | 646.5  | 2.1    | 13.187 |

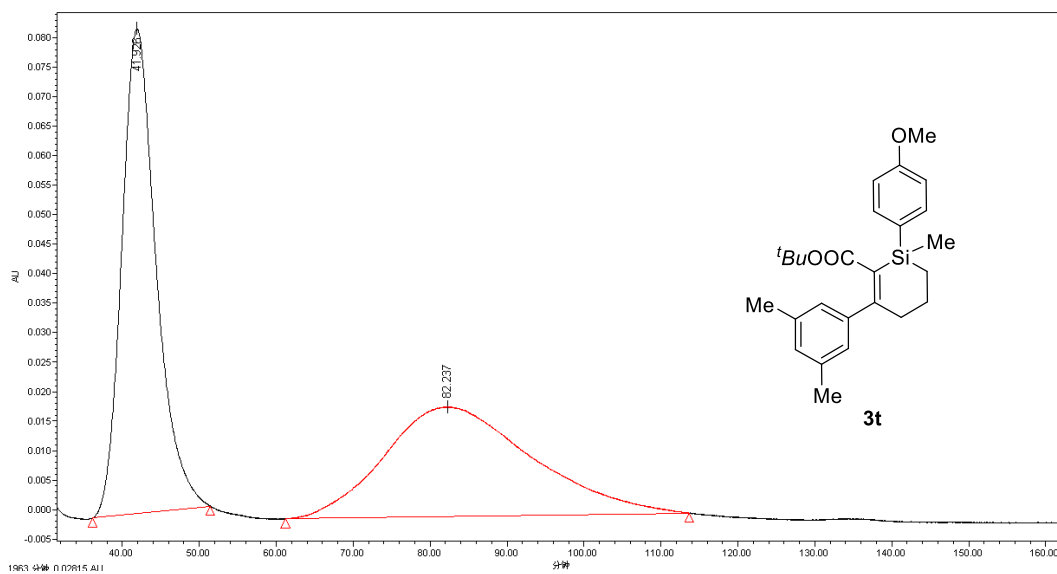

|   | Time/min | Area     | Height | Area% |
|---|----------|----------|--------|-------|
| 1 | 41.926   | 25630447 | 82270  | 50.88 |
| 2 | 82.237   | 24747592 | 18608  | 49.12 |

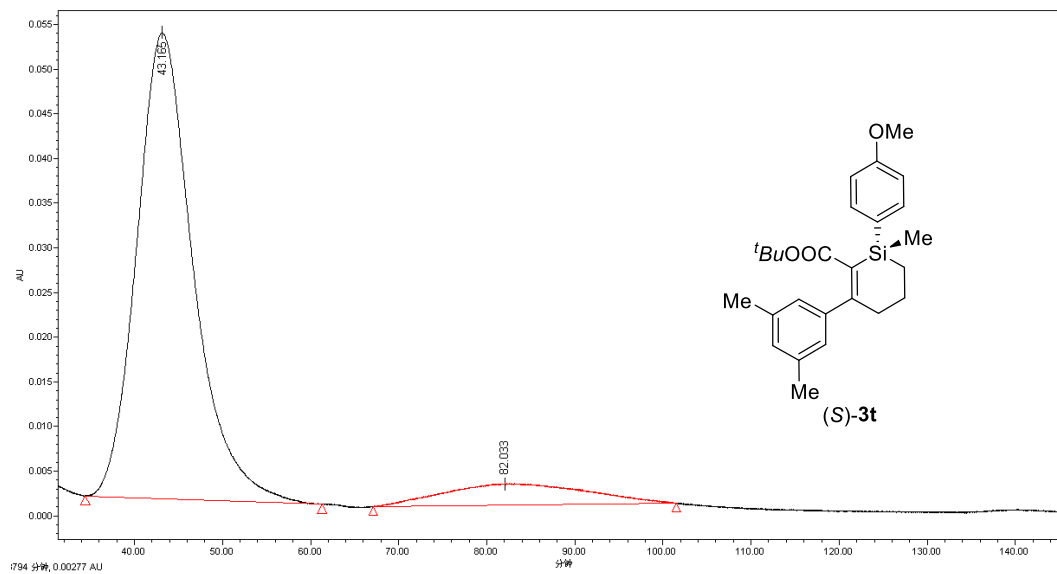

|   | Time/min | Area     | Height | Area% |
|---|----------|----------|--------|-------|
| 1 | 43.165   | 23231254 | 52155  | 89.63 |
| 2 | 82.033   | 2688343  | 2384   | 10.37 |

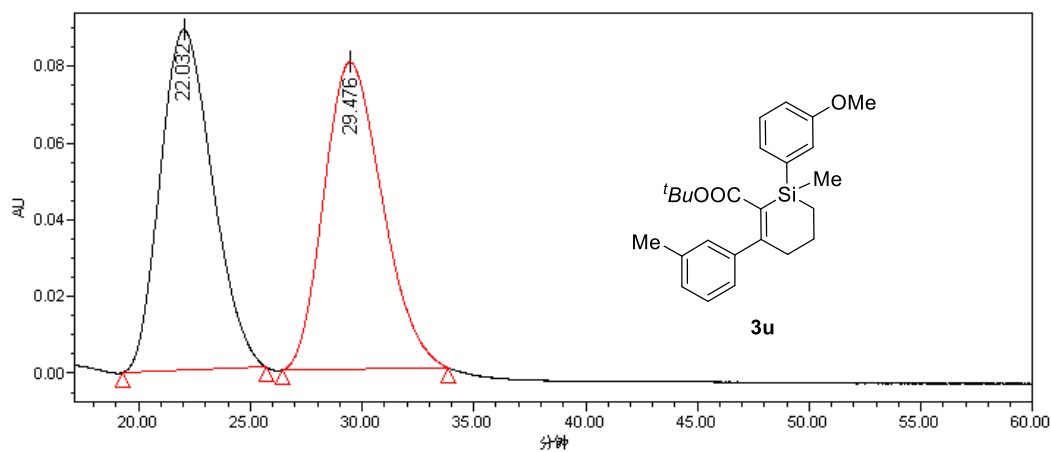

|   | Time/min | Area     | Height | Area% |
|---|----------|----------|--------|-------|
| 1 | 22.032   | 14425751 | 88890  | 49.84 |
| 2 | 29.476   | 14520231 | 80056  | 50.16 |

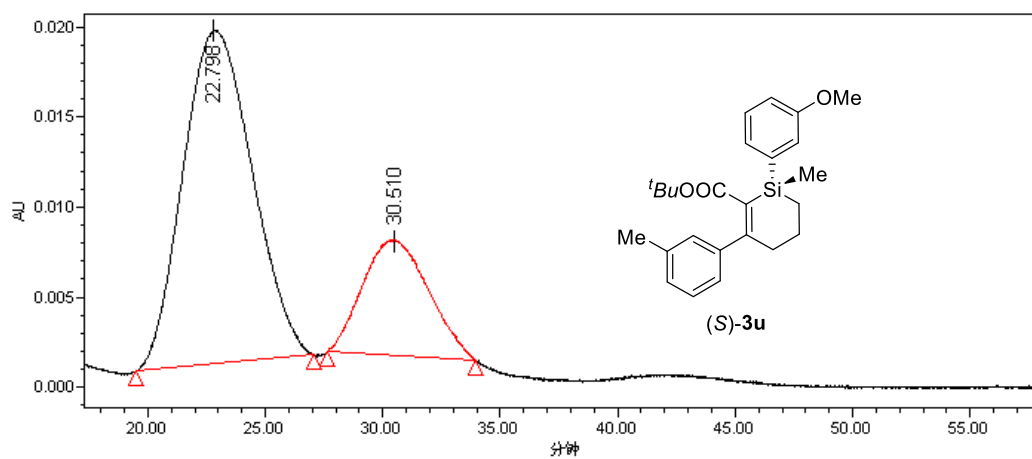

|   | Time/min | Area    | Height | Area% |
|---|----------|---------|--------|-------|
| 1 | 22.798   | 3787257 | 18481  | 75.25 |
| 2 | 30.510   | 1245375 | 6381   | 24.75 |

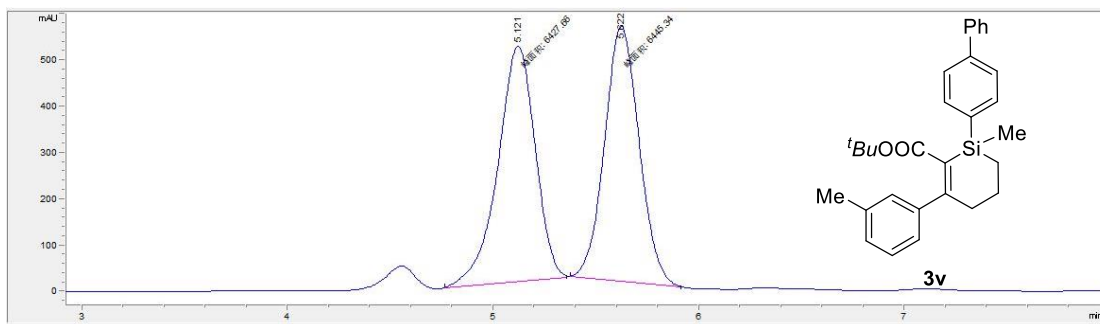

|   | Time/min | Area   | Height | Area%  |
|---|----------|--------|--------|--------|
| 1 | 5.121    | 6427.7 | 509.8  | 49.931 |
| 2 | 5.622    | 6445.3 | 551.3  | 50.069 |

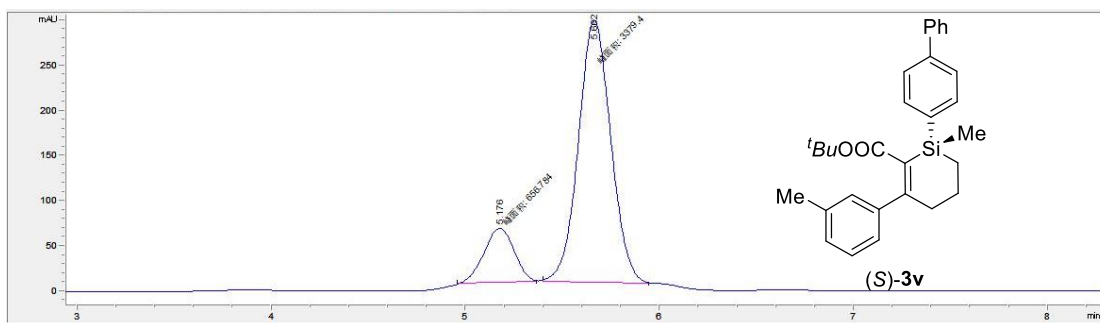

|   | Time/min | Area   | Height | Area%  |
|---|----------|--------|--------|--------|
| 1 | 5.176    | 656.8  | 60.2   | 16.272 |
| 2 | 5.662    | 3379.4 | 291.4  | 83.728 |

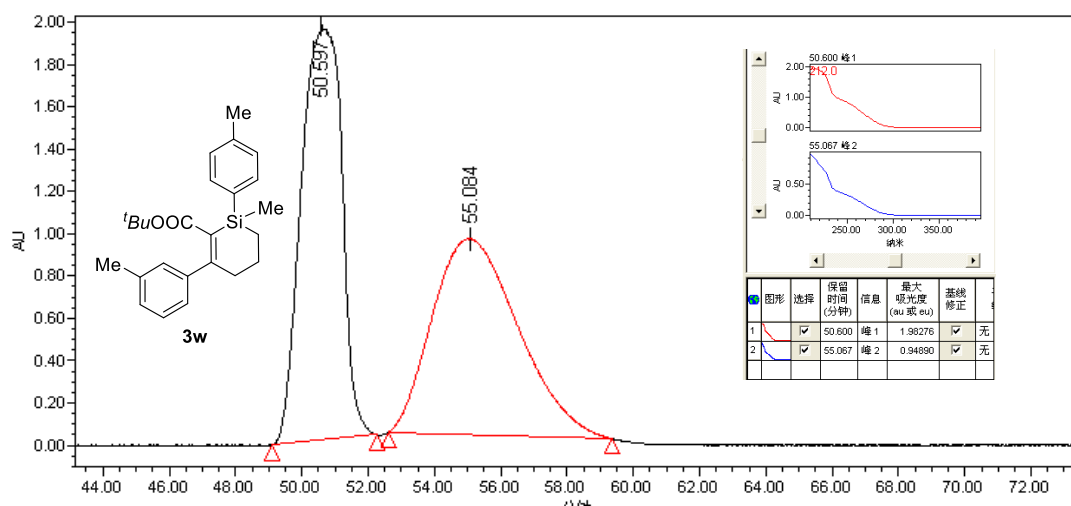

|   | Time/min | Area      | Height  | Area% |
|---|----------|-----------|---------|-------|
| 1 | 50.597   | 166515097 | 1957671 | 49.91 |
| 2 | 55.084   | 167112889 | 926944  | 50.09 |

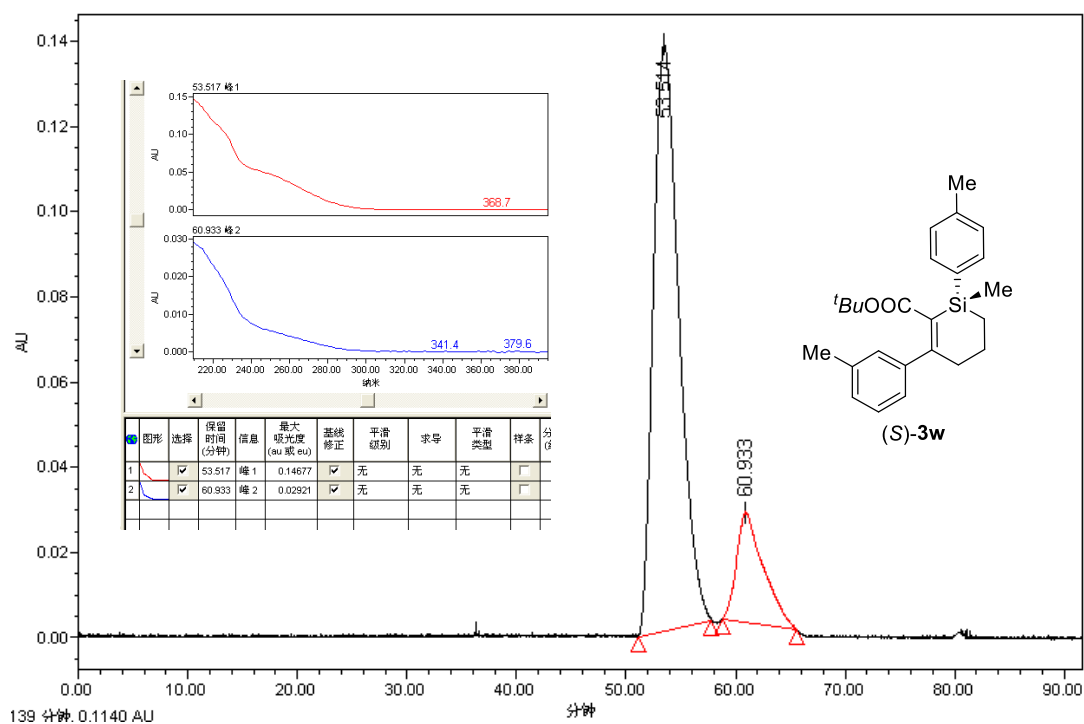

|   | Time/min | Area     | Height | Area% |
|---|----------|----------|--------|-------|
| 1 | 53.514   | 22397903 | 137505 | 83.59 |
| 2 | 60.933   | 4397811  | 25834  | 16.41 |

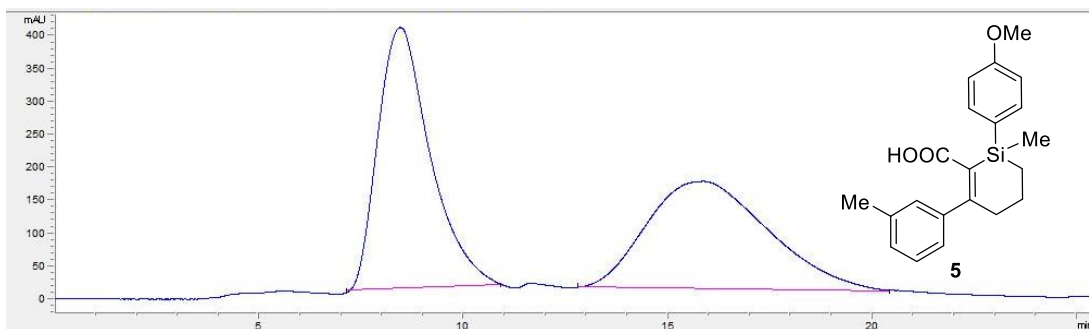

|   | Time/min | Area    | Height | Area%  |
|---|----------|---------|--------|--------|
| 1 | 8.452    | 35371.5 | 397    | 50.935 |
| 2 | 15.879   | 34072.7 | 164    | 49.065 |

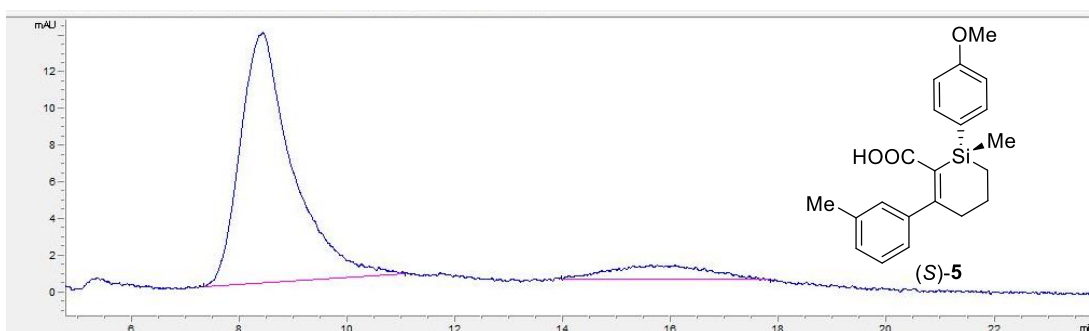

|   | Time/min | Area  | Height | Area%  |
|---|----------|-------|--------|--------|
| 1 | 8.439    | 911.7 | 13.7   | 90.555 |
| 2 | 15.628   | 95.1  | 0.78   | 9.445  |
